# Supplementary material for: Chemoselective, osmium-free, dihydroxylation/oxidative cleavage of heteroaryl isoprenes by a contemporary Malaprade reaction
Source: Royal Society of Chemistry journal article supplement (doi:10.1039/d2ob01643e), 2022-01-01
Supplement: d2ob01643e1.pdf [file d2ob01643e1.pdf]

## Chemoselective, Osmium-Free, Dihydroxylation / Oxidative Cleavage of Heteroaryl Isoprenes by a Contemporary Malaprade Reaction

Zachary Z. Gulledge, Connor C. Pinson, Alexander M. Stovall, Fortune O. Dzeagu,  
and Jesse D. Carrick\*

Department of Chemistry, Tennessee Technological University, Laboratory Science Commons, 803 Stadium  
Drive Cookeville, TN 38505-0001

### *Supporting Information*

#### **Table of Contents**

|                                         |               |
|-----------------------------------------|---------------|
|                                         | <b>S1–S2</b>  |
| Experimental Procedures                 | <b>S3–S21</b> |
| Compound <b>6</b> <sup>1</sup> H NMR    | <b>S22</b>    |
| Compound <b>6</b> <sup>13</sup> C NMR   | <b>S23</b>    |
| Compound <b>S7</b> <sup>1</sup> H NMR   | <b>S24</b>    |
| Compound <b>S7</b> <sup>13</sup> C NMR  | <b>S25</b>    |
| Compound <b>S8</b> <sup>1</sup> H NMR   | <b>S26</b>    |
| Compound <b>S8</b> <sup>13</sup> C NMR  | <b>S27</b>    |
| Compound <b>S9</b> <sup>1</sup> H NMR   | <b>S28</b>    |
| Compound <b>S9</b> <sup>13</sup> C NMR  | <b>S29</b>    |
| Compound <b>S9</b> <sup>19</sup> F NMR  | <b>S30</b>    |
| Compound <b>S10</b> <sup>1</sup> H NMR  | <b>S31</b>    |
| Compound <b>S10</b> <sup>13</sup> C NMR | <b>S32</b>    |
| Compound <b>S11</b> <sup>1</sup> H NMR  | <b>S33</b>    |
| Compound <b>S11</b> <sup>13</sup> C NMR | <b>S34</b>    |
| Compound <b>S13</b> <sup>1</sup> H NMR  | <b>S35</b>    |
| Compound <b>S13</b> <sup>13</sup> C NMR | <b>S36</b>    |
| Compound <b>S15</b> <sup>1</sup> H NMR  | <b>S37</b>    |
| Compound <b>S15</b> <sup>13</sup> C NMR | <b>S38</b>    |
| Compound <b>S16</b> <sup>1</sup> H NMR  | <b>S39</b>    |
| Compound <b>S16</b> <sup>13</sup> C NMR | <b>S40</b>    |
| Compound <b>S17</b> <sup>1</sup> H NMR  | <b>S41</b>    |
| Compound <b>S17</b> <sup>13</sup> C NMR | <b>S42</b>    |
| Compound <b>S18</b> <sup>1</sup> H NMR  | <b>S43</b>    |
| Compound <b>S18</b> <sup>13</sup> C NMR | <b>S44</b>    |
| Compound <b>S19</b> <sup>1</sup> H NMR  | <b>S45</b>    |
| Compound <b>S19</b> <sup>13</sup> C NMR | <b>S46</b>    |
| Compound <b>S19</b> <sup>19</sup> F NMR | <b>S47</b>    |
| Compound <b>S20</b> <sup>1</sup> H NMR  | <b>S48</b>    |
| Compound <b>S20</b> <sup>13</sup> C NMR | <b>S49</b>    |
| Compound <b>S21</b> <sup>1</sup> H NMR  | <b>S50</b>    |
| Compound <b>S21</b> <sup>13</sup> C NMR | <b>S51</b>    |
| Compound <b>S22</b> <sup>1</sup> H NMR  | <b>S52</b>    |
| Compound <b>S22</b> <sup>13</sup> C NMR | <b>S53</b>    |
| Compound <b>S23</b> <sup>1</sup> H NMR  | <b>S54</b>    |

**Table of Contents**, continued

|                                            |      |
|--------------------------------------------|------|
| Compound <b>S23</b> <sup>13</sup> C NMR    | S55  |
| Compound <b>S24</b> <sup>1</sup> H NMR     | S56  |
| Compound <b>S24</b> <sup>13</sup> C NMR    | S57  |
| Compound <b>S25</b> <sup>1</sup> H NMR     | S58  |
| Compound <b>S25</b> <sup>13</sup> C NMR    | S59  |
| Compound <b>S26</b> <sup>1</sup> H NMR     | S60  |
| Compound <b>S26</b> <sup>13</sup> C NMR    | S61  |
| Compound <b>S31</b> <sup>1</sup> H NMR     | S62  |
| Compound <b>S31</b> <sup>13</sup> C NMR    | S63  |
| Compound <b>S32</b> <sup>1</sup> H NMR     | S64  |
| Compound <b>S32</b> <sup>13</sup> C NMR    | S65  |
| Compound <b>2</b> <sup>1</sup> H NMR       | S66  |
| Compound <b>2</b> <sup>13</sup> C NMR      | S67  |
| Compound <b>10</b> <sup>1</sup> H NMR      | S68  |
| Compound <b>10</b> <sup>13</sup> C NMR     | S69  |
| Compound <b>11</b> <sup>1</sup> H NMR      | S70  |
| Compound <b>11</b> <sup>13</sup> C NMR     | S71  |
| Compound <b>12</b> <sup>1</sup> H NMR      | S72  |
| Compound <b>12</b> <sup>13</sup> C NMR     | S73  |
| Compound <b>12</b> <sup>19</sup> F NMR     | S74  |
| Compound <b>13</b> <sup>1</sup> H NMR      | S75  |
| Compound <b>13</b> <sup>13</sup> C NMR     | S76  |
| Compound <b>14</b> <sup>1</sup> H NMR      | S77  |
| Compound <b>14</b> <sup>13</sup> C NMR     | S78  |
| Compound <b>25</b> <sup>1</sup> H NMR      | S79  |
| Compound <b>25</b> <sup>13</sup> C NMR     | S80  |
| Automated Flash Chromatogram of <b>6</b>   | S81  |
| Automated Flash Chromatogram of <b>S7</b>  | S82  |
| Automated Flash Chromatogram of <b>S8</b>  | S83  |
| Automated Flash Chromatogram of <b>S9</b>  | S84  |
| Automated Flash Chromatogram of <b>S10</b> | S85  |
| Automated Flash Chromatogram of <b>S11</b> | S86  |
| Automated Flash Chromatogram of <b>S13</b> | S87  |
| Automated Flash Chromatogram of <b>S15</b> | S88  |
| Automated Flash Chromatogram of <b>S16</b> | S89  |
| Automated Flash Chromatogram of <b>S17</b> | S90  |
| Automated Flash Chromatogram of <b>S18</b> | S91  |
| Automated Flash Chromatogram of <b>S19</b> | S92  |
| Automated Flash Chromatogram of <b>S20</b> | S93  |
| Automated Flash Chromatogram of <b>S21</b> | S94  |
| Automated Flash Chromatogram of <b>S22</b> | S95  |
| Automated Flash Chromatogram of <b>S23</b> | S96  |
| Automated Flash Chromatogram of <b>S24</b> | S97  |
| Automated Flash Chromatogram of <b>S25</b> | S98  |
| Automated Flash Chromatogram of <b>S31</b> | S99  |
| Automated Flash Chromatogram of <b>S32</b> | S100 |

## Experimental Section

**General Considerations:** All reagents were purchased from U.S. chemical suppliers, stored according to published protocols, and used as received unless indicated otherwise. All experiments were performed in oven-dried glassware. Reaction progress was monitored using thin-layer chromatography on glass-backed silica gel plates and/or  $^1\text{H}$  NMR analysis of crude reaction mixtures.  $R_f$  values for compounds that resulted in a concentrically observed spot on normal phase silica gel, or alumina are reported using the conditions listed. Melting point data listed is for a single, uncorrected experiment. All reported yields listed are for pure compounds and corrected for residual solvent, if applicable, from  $^1\text{H}$  NMR spectroscopy. Infrared spectral data was acquired from the (form) listed. All  $^1\text{H}$  and  $^{13}\text{C}$  NMR data was acquired from a 500 MHz multinuclear spectrometer with broad-band  $\text{N}_2$  cryoprobe. Chemical shifts are reported using the  $\delta$  scale and are referenced to the residual solvent signal:  $\text{CDCl}_3$  ( $\delta$  7.26),  $(\text{CD}_3)_2\text{C}=\text{O}$  ( $\delta$  2.05), and  $(\text{CD}_3)_2\text{S}=\text{O}$  ( $\delta$  2.50) for  $^1\text{H}$  NMR and  $\text{CDCl}_3$  ( $\delta$  77.15),  $(\text{CD}_3)_2\text{C}=\text{O}$  ( $\delta$  29.84),  $(\text{CD}_3)_2\text{S}=\text{O}$  ( $\delta$  39.52), and  $\text{CD}_3\text{CN}$  ( $\delta$  1.32) for  $^{13}\text{C}$  NMR.<sup>1</sup> Splittings are reported as follows: (br) = broad, (s) = singlet, (d) = doublet, (t) = triplet, (dd) = doublet of doublets, and (m) = multiplet.  $^{13}\text{C}$  NMR spectra were corrected for ring down using linear back prediction. High resolution mass spectrometry (HRMS) data was obtained utilizing electron impact ionization (EI) with a magnetic sector (EBE trisector), double focusing-geometry mass analyzer. In regards to analysis of samples via Qtof in positive ion mode, the following parameters were utilized: Capillary voltage 0.5–1.5 KV, Sampling cone 40 V, Source offset 60, Source temperature 80 °C, Desolvation 350 °C, Cone gas 30 L/h, Desolvation gas 600 L/h, lock spray capillary voltage 0.2KV, lock mass: 556.2771 in positive mode (leucine enkephalin).

### General Procedure for the Synthesis of Methyl MTPhen Derivatives

Table S1. Summary of NBS-mediated Oxidation Conditions

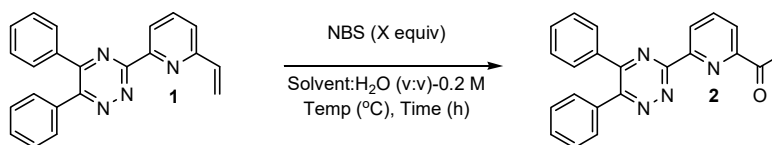

| Entry          | NBS (equiv) | Solvent                | Temp (°C) | Time (h) | Conversion (%) <sup>a</sup>   |
|----------------|-------------|------------------------|-----------|----------|-------------------------------|
| 1              | 1.2         | EtOAc (10:1)           | 75        | 18       | 56 ( <b>38</b> ) <sup>b</sup> |
| 2              | 1.2         | THF (10:1)             | 66        | 18       | 0                             |
| 3              | 1.2         | MeCN (10:1)            | 82        | 18       | 31                            |
| 4              | 1.2         | MeOH (10:1)            | 65        | 18       | 0                             |
| 5              | 1.2         | $\text{CHCl}_3$ (10:1) | 62        | 18       | trace                         |
| 6 <sup>c</sup> | 1.2         | EtOAc (10:1)           | 75        | 18       | 50                            |
| 7 <sup>d</sup> | 1.2         | EtOAc (10:1)           | 75        | 18       | 81 ( <b>42</b> ) <sup>b</sup> |

<sup>a</sup>Determined via integration of crude  $^1\text{H}$ -NMR spectrum without internal standard

<sup>b</sup>Purified, isolated yield (average of 3 experiments)

<sup>c</sup>Drop-wise addition of NBS over 2 hours as a solution in MeCN

<sup>d</sup>Brand-new NBS utilized

**Table S2. Summary of Au-mediated Alkyne Hydration Strategies**

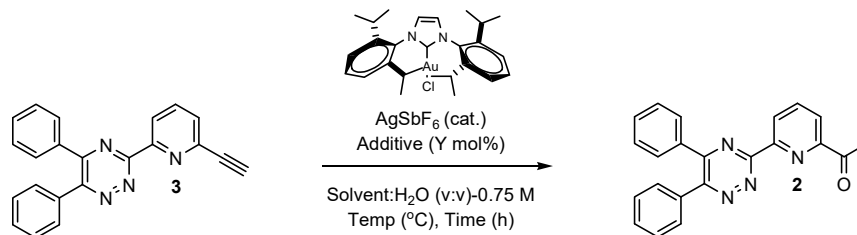

| Entry | [(iPr)AuCl] | Additive (mol%)          | Solvent           | Temp (°C)        | Time (h) | Conversion (%) <sup>b</sup>   |
|-------|-------------|--------------------------|-------------------|------------------|----------|-------------------------------|
| 1     | 100 ppm     | ----                     | MeOH (100:0)      | 65               | 20       | 0                             |
| 2     | 500 ppm     | ----                     | MeOH (2:1)        | 65               | 20       | 0                             |
| 3     | 5 mol%      | ----                     | MeOH (2:1)        | 65               | 20       | 15                            |
| 4     | 5 mol%      | ----                     | 1,4-dioxane (3:1) | 120 <sup>c</sup> | 16       | 15                            |
| 5     | 5 mol%      | <i>p</i> -TsOH (5 mol%)  | MeOH (2:1)        | 80 <sup>c</sup>  | 20       | 48                            |
| 6     | 5 mol%      | <i>p</i> -TsOH (5 mol%)  | MeOH (10:1)       | 80 <sup>c</sup>  | 20       | 50                            |
| 7     | 5 mol%      | <i>p</i> -TsOH (5 mol%)  | MeOH (10:1)       | 80 <sup>c</sup>  | 40       | 50                            |
| 8     | 5 mol%      | <i>p</i> -TsOH (5 mol%)  | MeOH (10:1)       | 85 <sup>c</sup>  | 20       | 50 ( <b>38</b> ) <sup>d</sup> |
| 9     | 5 mol%      | <i>p</i> -TsOH (5 mol%)  | Toluene (10:1)    | 85 <sup>c</sup>  | 20       | 0                             |
| 10    | 5 mol%      | <i>p</i> -TsOH (10 mol%) | MeOH (10:1)       | 85 <sup>c</sup>  | 20       | 37                            |
| 11    | 10 mol%     | <i>p</i> -TsOH (10 mol%) | MeOH (10:1)       | 85 <sup>c</sup>  | 20       | 42                            |

<sup>a</sup>Tip of spatula amount used

<sup>b</sup>Determined via integration of crude <sup>1</sup>H-NMR spectrum without internal standard

<sup>c</sup>Reaction performed in a tightly sealed vessel

<sup>d</sup>Purified, isolated yield

**Scheme S1. Preparation of Br-MTP Starting Materials**

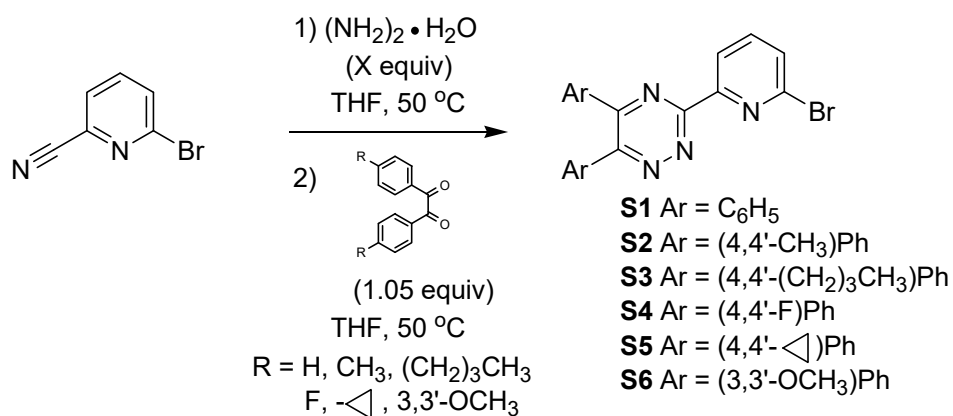

For a general procedure for the construction of **S1**–**S6** above, an adaptation of a literature procedure was employed.<sup>2</sup> The requisite Suzuki-Miyaura cross-coupling of 4,4'-dibromobenzil with potassium butyltrifluoroborate afforded the 4,4'-dibutylbenzyl used in the condensation sequence described above for accessing **S3**.

## Scheme S2. General procedure for the Suzuki-Miyaura Cross-Coupling of Scaffolds

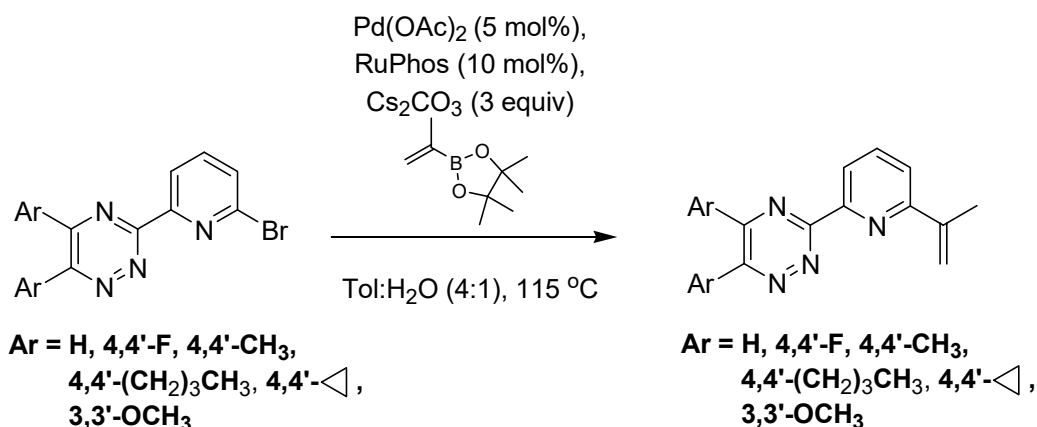

An adaptation of a literature procedure was employed.<sup>3</sup> To a 100 mL round-bottom flask equipped with a magnetic stirring bar at ambient temperature was charged the requisite functionalized bromopyridine (2.0000 g, 5.144 mmol, 1.00 equiv), followed by palladium(II) acetate (0.0577 g, 0.257 mmol, 0.05 equiv), 2-dicyclohexylphosphino-2',6'-diisopropoxybiphenyl (RuPhos) (0.2400 g, 0.514 mmol, 0.10 equiv), and  $\text{Cs}_2\text{CO}_3$  (5.0280 g, 15.432 mmol, 3.00 equiv). The flask was then fitted with a rubber septum and purged with dry nitrogen for five minutes using a gas bubbler. After purging with inert atmosphere, the solids were slurried in a 4:1 (v:v) mixture of toluene:H<sub>2</sub>O (25.72 mL, 0.20 M final concentration) and stirred for 10 minutes at ambient temperature. 2-Isopropenyl-4,4,5,5-tetramethyl-1,3,2-dioxaborolane, or analogous coupling reagent, (1.037 g, 6.172 mmol, 1.20 equiv) was then added under a stream of nitrogen and the contents heated to 110 °C for 16 hours. TLC results indicating consumption of starting material were subsequently benchmarked by <sup>1</sup>H NMR spectroscopy to determine relative ratios of starting material to product, as well as to assess the relevant impurity profile for purification. The crude reaction mixtures were directly adsorbed on silica gel (following removal of aqueous phase) under reduced pressure and purified using automated flash column chromatography with normal phase silica gel columns to afford the title compounds in the morphologies indicated after concentration *in vacuo* at ambient temperature.

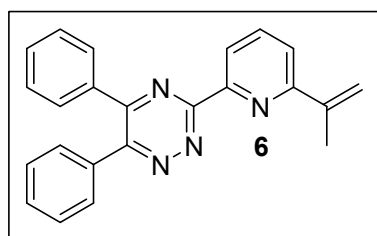

3-(6-Isopropenyl-pyridin-2-yl)-6-(1-methylene-but-2-enyl)-5-phenyl-[1,2,4]triazine (**6**). Prepared according to the general procedure discussed above input of **S1** (2.0080 g, 5.165 mmol, 1.00 equiv),  $\text{Pd(OAc)}_2$  (0.0579 g, 0.2585 mmol, 0.05 equiv), RuPhos (0.2410 g, 0.5165 mmol, 0.10 equiv),  $\text{Cs}_2\text{CO}_3$  (5.0486 g, 15.495 mmol, 3.00 equiv), and 2-isopropenyl-4,4,5,5-tetramethyl-1,3,2-dioxaborolane (1.0414 g, 6.198 mmol, 1.20 equiv),  $R_f = 0.35$ , 20%

ethylacetate:hexanes; purified using automated flash column chromatography on a normal phase silica gel column with a methyl-*tert*-butyl ether:hexanes gradient mobile phase; isolated yield 1.7180 g, 95%; yellow solid; melting point = 165.9–177.3 °C; <sup>1</sup>H NMR (500 MHz,  $(\text{CD}_3)_2\text{CO}$ ):  $\delta = 8.50$  (d,  $J = 7.7$  Hz, 1H), 8.04 (t,  $J = 7.8$  Hz, 1H), 7.86 (d,  $J = 7.8$  Hz, 1H), 7.76–7.72 (m, 2H), 7.70–7.66 (m, 2H), 7.53–7.48 (m, 2H), 7.47–7.41 (m, 4H), 6.14 (s, 1H), 5.44–5.41 (m, 1H), 2.33 (s, 3H); <sup>13</sup>C{<sup>1</sup>H} NMR (125 MHz,  $(\text{CD}_3)_2\text{CO}$ ):  $\delta = 162.0, 159.2, 157.4, 156.6, 153.4, 144.2, 138.4, 137.1, 137.0, 131.5, 130.9, 130.5, 130.4, 129.4, 129.3, 123.3, 121.9, 116.5, 20.6$ ; IR (ATR-solid):

$\bar{\nu}_{max}$  = 3048, 2976, 2955, 2921, 1581, 1565, 1491, 1440, 1358, 775, 763, 697  $\text{cm}^{-1}$ ; HRMS (EI):  $m/z$ :  $[M]^+$  Calcd for  $\text{C}_{23}\text{H}_{18}\text{N}_4$  350.1531; Found: 350.1519.

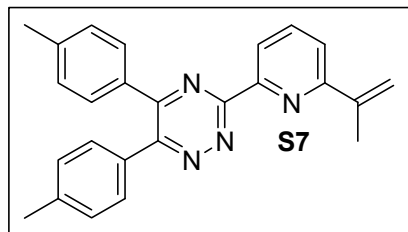

*3-(6-Isopropenyl-pyridin-2-yl)-5,6-di-p-tolyl-[1,2,4]triazine (S7)*. Prepared according to the general procedure discussed above input of **S2** (1.1080 g, 2.663 mmol, 1.00 equiv),  $\text{Pd}(\text{OAc})_2$  (0.0299 g, 0.1331 mmol, 0.05 equiv), RuPhos (0.1243 g, 0.2663 mmol, 0.10 equiv),  $\text{Cs}_2\text{CO}_3$  (2.6030 g, 7.989 mmol, 3.00 equiv), and 2-isopropenyl-4,4,5,5-tetramethyl-1,3,2-dioxaborolane (1.0414 g, 3.1956 mmol, 1.20 equiv),  $R_f$  = 0.40, 20%

ethylacetate:hexanes; purified using automated flash column chromatography on a normal phase silica gel column with an ethyl acetate:hexanes gradient mobile phase; isolated yield 0.5640 g, 56%; peach colored solid; melting point = 154.2–155.6  $^\circ\text{C}$ ;  $^1\text{H}$  NMR (500 MHz,  $(\text{CD}_3)_2\text{CO}$ ):  $\delta$  = 8.49 (d,  $J$  = 7.7 Hz, 1H), 8.03 (t,  $J$  = 7.8 Hz, 1H), 7.84 (d,  $J$  = 7.9 Hz, 1H), 7.65 (d,  $J$  = 8.0 Hz, 2H), 7.58 (d,  $J$  = 7.9 Hz, 2H), 7.28 (d,  $J$  = 7.8 Hz, 2H), 7.25 (d,  $J$  = 7.9 Hz, 2H), 6.14 (s, 1H), 5.42 (s, 1H), 2.40 (s, 3H), 2.38 (s, 3H), 2.33 (s, 3H);  $^{13}\text{C}\{^1\text{H}\}$  NMR (125 MHz,  $(\text{CD}_3)_2\text{CO}$ ):  $\delta$  = 161.7, 159.1, 157.1, 156.3, 153.5, 144.2, 141.9, 140.5, 138.3, 134.27, 134.25, 130.8, 130.3, 130.1, 130.0, 123.2, 121.8, 116.5, 21.4, 21.3, 20.6; IR (ATR-solid):  $\bar{\nu}_{max}$  = 3032, 2921, 1699, 1609, 1583, 1493, 1384, 1360, 1241, 1185, 1091, 911, 820, 733, 592, 538  $\text{cm}^{-1}$ ; HRMS (EI):  $m/z$ :  $[M]^+$  Calcd for  $\text{C}_{25}\text{H}_{22}\text{N}_4$  378.1844; Found: 378.1847.

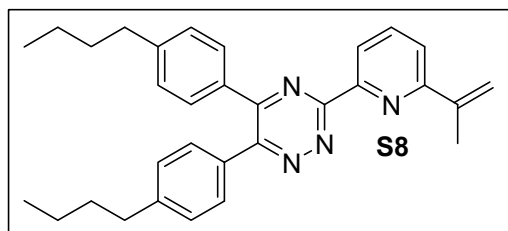

*5,6-Bis-(4-butyl-phenyl)-3-(6-isopropenyl-pyridin-2-yl)-[1,2,4]triazine (S8)*. Prepared according to the general procedure discussed above input of **S3** (0.6169 g, 1.233 mmol, 1.00 equiv),  $\text{Pd}(\text{OAc})_2$  (0.0138 g, 0.0616 mmol, 0.05 equiv), RuPhos (0.0575 g, 0.1233 mmol, 0.10 equiv),  $\text{Cs}_2\text{CO}_3$  (1.2052 g, 3.699 mmol, 3.00 equiv), and 2-isopropenyl-4,4,5,5-tetramethyl-1,3,2-

dioxaborolane (0.2487 g, 1.480 mmol, 1.20 equiv),  $R_f$  = 0.53, 20% ethyl acetate:hexanes; purified using automated flash column chromatography on a normal phase silica gel column with an ethyl acetate:methyl-*tert*-butyl ether (1:1):hexanes gradient mobile phase; isolated yield 0.302 g, 53%; yellow crystalline solid; melting point = 50.1–51.7  $^\circ\text{C}$ ;  $^1\text{H}$  NMR (500 MHz,  $\text{CDCl}_3$ ):  $\delta$  = 8.53 (d,  $J$  = 7.8 Hz, 1H), 7.88 (t,  $J$  = 7.8 Hz, 1H), 7.69–7.64 (m, 3H), 7.58 (d,  $J$  = 7.5 Hz, 2H), 7.21 (d,  $J$  = 7.5 Hz, 1H), 7.17 (d,  $J$  = 7.6 Hz, 2H), 6.10 (s, 1H), 5.42 (s, 1H), 2.66 (t,  $J$  = 8.8 Hz, 2H), 2.64 (t,  $J$  = 8.8 Hz, 2H), 2.36 (s, 3H), 1.67–1.56 (m, 4H), 0.98–0.86 (m, 6H);  $^{13}\text{C}\{^1\text{H}\}$  NMR (125 MHz,  $\text{CDCl}_3$ ):  $\delta$  = 160.7, 158.9, 156.2, 155.8, 152.3, 146.3, 145.0, 143.1, 137.4, 133.3, 133.0, 130.0, 129.5, 128.8, 128.7, 122.5, 121.3, 116.7, 35.67, 35.63, 33.44, 33.35, 22.47, 22.42, 20.6, 14.08, 14.06; IR (ATR-solid):  $\bar{\nu}_{max}$  = 2956, 2929, 2858, 1609, 1582, 1492, 1382, 1360, 831, 733  $\text{cm}^{-1}$ ; HRMS (EI):  $m/z$ :  $[M]^+$  Calcd for  $\text{C}_{31}\text{H}_{34}\text{N}_4$  462.2783; Found: 462.2795.

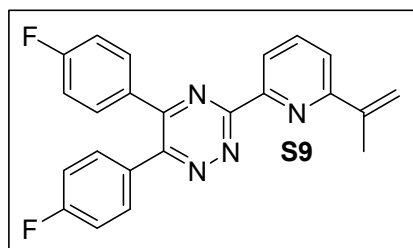

*5,6-Bis-(4-fluoro-phenyl)-3-(6-isopropenyl-pyridin-2-yl)-[1,2,4]triazine (S9)*. Prepared according to the general procedure discussed above input of **S4** (0.6906 g, 1.629 mmol, 1.00 equiv),  $\text{Pd}(\text{OAc})_2$  (0.0183 g, 0.0814 mmol, 0.05 equiv), RuPhos (0.0760 g, 0.163 mmol, 0.10 equiv),  $\text{Cs}_2\text{CO}_3$  (1.5923 g, 4.887 mmol, 3.00 equiv), and 2-isopropenyl-4,4,5,5-tetramethyl-1,3,2-dioxaborolane (0.3285 g, 1.955 mmol, 1.20

equiv),  $R_f = 0.33$ , 20% ethyl acetate:hexanes ; purified using automated flash column chromatography on a normal phase silica gel column with an ethyl acetate:methyl-*tert*-butyl ether (1:1):hexanes gradient mobile phase ; isolated yield 0.192 g, 64%; yellow solid; melting point = 163.5–164.9 °C;  $^1\text{H}$  NMR (500 MHz,  $\text{CDCl}_3$ ):  $\delta = 8.55$  (d,  $J = 7.8$  Hz, 1H), 7.93 (t,  $J = 7.8$  Hz, 1H), 7.78–7.73 (m, 2H), 7.70 (d,  $J = 8.0$  Hz, 1H), 7.69–7.64 (m, 2H), 7.15–7.06 (m, 4H), 6.11 (s, 1H), 5.44 (m, 1H), 2.36 (s, 3H) ;  $^{13}\text{C}\{^1\text{H}\}$  NMR (125 MHz,  $\text{CDCl}_3$ ):  $\delta = 165.3$  ( $J = 330.6$  Hz), 163.3, 160.9, 159.0, 155.2, 154.9, 151.8, 142.9, 137.7, 132.3 ( $J = 34.3$  Hz), 131.7 ( $J = 12.9$  Hz), 131.6 ( $J = 34.5$  Hz), 131.5 ( $J = 13.7$  Hz), 122.7, 121.7, 117.1, 116.1, 20.6 ;  $^{19}\text{F}$  NMR (471 MHz,  $(\text{CD}_3)_2\text{SO}$ ):  $\delta = -109.9$ – $-110.0$  (m, 1F),  $-111.8$ – $-111.9$  (m, 1F) ; IR (ATR-solid):  $\bar{\nu}_{\text{max}} = 3072$ , 2922, 2863, 1603, 1583, 1514, 1492, 1383, 1362, 1236, 1160, 841, 728, 668  $\text{cm}^{-1}$ ; HRMS (EI):  $m/z$ :  $[\text{M}]^+$  Calcd for  $\text{C}_{23}\text{H}_{16}\text{F}_2\text{N}_4$  386.1343; Found: 386.1333.

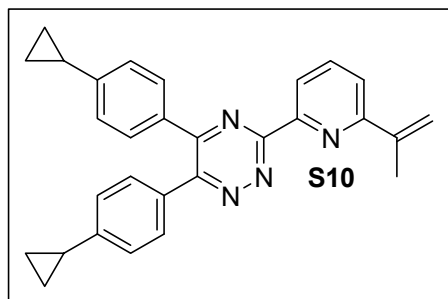

*5,6-Bis-(4-cyclopropyl-phenyl)-3-(6-isopropenyl-pyridin-2-yl)-[1,2,4]triazine (S10)*. Prepared according to the general procedure discussed above input of **S5** (0.0981 g, 0.210 mmol, 1.00 equiv),  $\text{Pd}(\text{OAc})_2$  (0.0024 g, 0.001 mmol, 0.05 equiv), RuPhos (0.0098 g, 0.002 mmol, 0.10 equiv),  $\text{Cs}_2\text{CO}_3$  (0.205 g, 0.629 mmol, 3.00 equiv), and 2-isopropenyl-4,4,5,5-tetramethyl-1,3,2-dioxaborolane (1.0414 g, 6.198 mmol, 1.20 equiv),  $R_f = 0.38$ , 20% ethyl acetate:hexanes ; purified using automated flash column chromatography on a

normal phase silica gel column with an ethyl acetate:methyl-*tert*-butyl ether (1:1):hexanes gradient mobile phase ; isolated yield 0.0514 g, 57%; yellow crystalline solid; melting point = 112.3–113.7 °C;  $^1\text{H}$  NMR (500 MHz,  $\text{CDCl}_3$ ):  $\delta = 8.52$  (d,  $J = 7.7$  Hz, 1H), 7.88 (t,  $J = 7.8$  Hz, 1H), 7.68–7.63 (m, 3H), 7.57 (d,  $J = 7.6$  Hz, 2H), 7.08 (d,  $J = 7.7$  Hz, 2H), 7.05 (d,  $J = 7.7$  Hz, 2H), 6.10 (s, 1H), 5.41 (s, 1H), 2.35 (s, 3H), 1.97–1.87 (m, 2H), 1.07–1.00 (m, 4H), 0.79–0.73 (m, 4H) ;  $^{13}\text{C}\{^1\text{H}\}$  NMR (125 MHz,  $\text{CDCl}_3$ ):  $\delta = 160.6$ , 158.9, 155.9, 155.6, 152.3, 147.9, 146.3, 143.2, 137.4, 133.0, 132.7, 130.1, 129.5, 125.9, 125.7, 122.5, 121.3, 116.6, 20.6, 15.7, 15.6, 10.3, 10.0 ; IR (ATR-solid):  $\bar{\nu}_{\text{max}} = 3081$ , 3004, 1699, 1609, 1492, 1384, 1362, 902, 826, 733  $\text{cm}^{-1}$ ; HRMS (EI):  $m/z$ :  $[\text{M}+\text{H}]^+$  Calcd for  $\text{C}_{29}\text{H}_{27}\text{N}_4$  431.2236 ; Found: 431.2233.

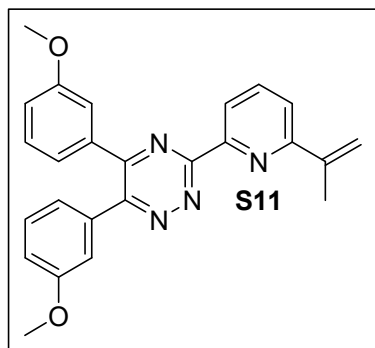

*3-(6-Isopropenyl-pyridin-2-yl)-5,6-bis-(3-methoxy-phenyl)-[1,2,4]triazine (S11)*. Prepared according to the general procedure discussed above input of **S6** (0.5151 g, 1.1500 mmol, 1.00 equiv),  $\text{Pd}(\text{OAc})_2$  (0.0129 g, 0.0575 mmol, 0.05 equiv), RuPhos (0.0537 g, 0.115 mmol, 0.10 equiv),  $\text{Cs}_2\text{CO}_3$  (1.1241 g, 3.450 mmol, 3.00 equiv), and 2-isopropenyl-4,4,5,5-tetramethyl-1,3,2-dioxaborolane (1.0414 g, 6.198 mmol, 1.20 equiv)  $R_f = 0.18$ , 20% ethyl acetate:hexanes ; purified using automated flash column chromatography on a normal phase silica gel column with an ethyl acetate:methyl-*tert*-butyl ether (1:1):hexanes gradient mobile

phase ; isolated yield 0.3442 g, 73%; yellow solid; melting point = 99.5–100.8 °C;  $^1\text{H}$  NMR (500 MHz,  $\text{CDCl}_3$ ):  $\delta = 8.56$  (dd,  $J = 0.7, 7.8$  Hz, 1H), 7.91 (t,  $J = 7.9$  Hz, 1H), 7.68 (dd,  $J = 0.8, 7.9$  Hz, 1H), 7.37 (br-s, 1H), 7.31–7.30 (m, 1H), 7.27–7.24 (m, 3H), 7.17–7.14 (m, 1H), 7.02–6.96 (m, 2H), 6.10 (br-s, 1H), 5.44–5.41 (m, 1H), 3.78 (s, 3H), 3.75 (s, 3H), 2.36 (s, 3H) ;  $^{13}\text{C}\{^1\text{H}\}$  NMR (125 MHz,  $\text{CDCl}_3$ ):  $\delta = 161.0$ , 159.9, 159.7, 158.9, 156.1, 155.8, 152.0, 143.1, 137.5, 137.0, 136.8, 129.8, 129.7, 122.6, 122.2, 121.5, 117.5, 116.7X (overlaps with 116.7), 116.7, 116.3, 114.7, 114.4,

55.5, 55.4, 20.6 ; IR (ATR-solid):  $\bar{\nu}_{max}$  = 3073, 3002, 2939, 2835, 1599, 1582, 1504, 1487, 1463, 1381, 1290, 1249, 1044, 817, 790, 703  $\text{cm}^{-1}$ ; HRMS (EI):  $m/z$ :  $[M]^+$  Calcd for  $\text{C}_{25}\text{H}_{22}\text{N}_4\text{O}_2$  410.1743; Found: 410.1731.

### Scheme S3. Suzuki-Miyaura Cross-Coupling of Functionalized Pyridines Utilized

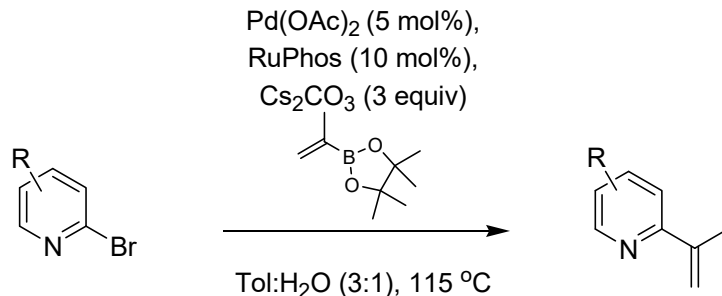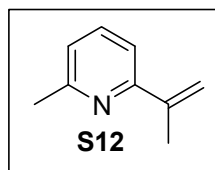

*2-Isopropenyl-6-methylpyridine (S12)*. Prepared according to the general procedure discussed above input of 2-bromo-6-methylpyridine (1.427 g, 8.346 mmol). Spectroscopic data obtained was commensurate with that previously reported.<sup>4</sup>

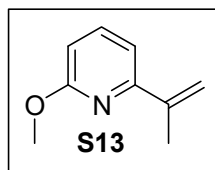

*2-Isopropenyl-6-methoxypyridine (S13)*. Prepared according to the general procedure discussed above via input of 2-bromo-6-methoxypyridine (0.2510 g, 1.343 mmol, 1.00 equiv), Pd(OAc)<sub>2</sub> (0.0150 g, 0.067 mmol, 0.05 equiv), RuPhos (0.0630 g, 0.135 mmol, 0.10 equiv), Cs<sub>2</sub>CO<sub>3</sub> (1.312 g, 4.027 mmol, 3.00 equiv), and 2-isopropenyl-4,4,5,5-tetramethyl-1,3,2-dioxaborolane (0.271 g, 1.613 mmol, 1.20 equiv),  $R_f$  = 0.70, 20% methyl *tert*-butyl ether:hexanes ; purified using automated flash column chromatography on a normal phase silica gel column with a methyl-*tert*-butyl ether:hexanes gradient mobile phase ; isolated yield 0.0852 g, 43%; colorless oil; <sup>1</sup>H NMR (500 MHz, (CD<sub>3</sub>)<sub>2</sub>CO):  $\delta$  = 7.64 (dd,  $J$  = 7.6, 7.9 Hz, 1H), 7.13 (d,  $J$  = 7.4 Hz, 1H), 6.66 (d,  $J$  = 8.2 Hz, 1H), 6.01–5.99 (m, 1H), 5.25–5.23 (m, 1H), 3.91 (s, 3H), 2.16 (s, 3H) ; <sup>13</sup>C{<sup>1</sup>H} NMR (125 MHz, CDCl<sub>3</sub>):  $\delta$  = 163.1, 155.5, 142.6, 139.0, 115.5, 112.5, 109.5, 53.2, 20.4 ; IR (ATR-liquid):  $\bar{\nu}_{max}$  = 3091, 2977, 2949, 2926, 2849, 1463, 1413, 1576, 1318, 1255, 1030, 808  $\text{cm}^{-1}$ ; HRMS (EI):  $m/z$ :  $[M+H]^+$  Calcd for  $\text{C}_9\text{H}_{12}\text{NO}$  150.0919; Found: 150.0917.

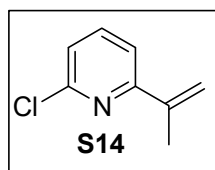

*2-Isopropenyl-6-chloropyridine (S14)*. Prepared according to the general procedure discussed above input of 2-bromo-6-chloropyridine (0.6018 g, 3.152 mmol). Spectroscopic data obtained was commensurate with that reported.<sup>5</sup>

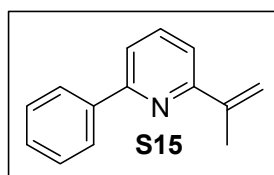

*2-Isopropenyl-6-phenylpyridine (S15)*. Prepared according to the general procedure discussed above via input of 2-bromo-6-phenylpyridine (0.1200 g, 0.515 mmol), Pd(OAc)<sub>2</sub> (0.0060 g, 0.0267 mmol, 0.05 equiv), RuPhos (0.024 g, 0.051 mmol, 0.10 equiv), Cs<sub>2</sub>CO<sub>3</sub> (0.5000 g, 1.535 mmol, 3.00 equiv), and 2-isopropenyl-4,4,5,5-tetramethyl-1,3,2-dioxaborolane (0.1030 g, 0.613 mmol, 1.20 equiv),  $R_f$  = 0.50, 2% methyl-*tert*-butyl ether ; purified using



automated flash column chromatography on a normal phase silica gel column with a methyl-*tert*-butyl ether:hexanes gradient mobile phase ; isolated yield 0.0450 g, 45%; light brown oil;  $^1\text{H}$  NMR (500 MHz,  $(\text{CD}_3)_2\text{CO}$ ):  $\delta$  = 8.18–8.15 (m, 2H), 7.86–7.80 (m, 2H), 7.58 (dd,  $J$  = 1.8, 6.7 Hz, 1H), 7.51–7.47 (m, 2H), 7.45–7.39 (m, 1H), 6.04–6.01 (m, 1H), 5.36–5.34 (m, 1H), 2.29–2.27 (m, 3H) ;  $^{13}\text{C}\{^1\text{H}\}$  NMR (125 MHz,  $(\text{CD}_3)_2\text{CO}$ ):  $\delta$  = 158.4, 156.4, 144.5, 140.3, 138.2, 129.7, 129.5, 127.5, 119.3, 118.9, 115.7, 20.6 ; IR (ATR-liquid):  $\bar{\nu}_{\text{max}}$  = 3064, 2976, 2921, 2853, 1372, 1567, 1458, 1444, 904, 822, 769, 747, 695  $\text{cm}^{-1}$ ; HRMS (EI):  $m/z$ :  $[\text{M}]^+$  Calcd for  $\text{C}_{14}\text{H}_{14}\text{N}$  196.1126; Found: 196.1129.

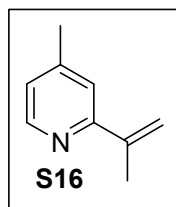

**2-Isopropenyl-4-methyl-pyridine (S16).** Prepared according to the general procedure discussed above via input of 2-bromo-4-methylpyridine (0.257 g, 1.503 mmol, 1.00 equiv),  $\text{Pd}(\text{OAc})_2$  (0.017 g, 0.076 mmol, 0.05 equiv), RuPhos (0.070 g, 0.150 mmol, 0.10 equiv),  $\text{Cs}_2\text{CO}_3$  (1.469 g, 4.509 mmol, 3.00 equiv), and 2-isopropenyl-4,4,5,5-tetramethyl-1,3,2-dioxaborolane (0.3030 g, 1.803 mmol, 1.20 equiv),  $R_f$  = 0.50, 15% methyl *tert*-butyl ether:hexanes ; purified using automated flash column chromatography on a normal phase silica gel column with a methyl-*tert*-butyl ether:hexanes gradient mobile phase ; isolated yield 0.1281 g, 64%; yellow oil;  $^1\text{H}$  NMR (500 MHz,  $\text{CD}_3\text{CN}$ ):  $\delta$  = 8.29 (d,  $J$  = 5.0 Hz, 1H), 7.37 (s, 1H), 7.01 (d,  $J$  = 4.6 Hz, 1H), 5.83 (s, 1H), 5.19–5.16 (m, 1H), 2.26 (s, 3H), 2.08–2.06 (m, 3H) ;  $^{13}\text{C}\{^1\text{H}\}$  NMR (125 MHz,  $(\text{CD}_3)_2\text{CO}$ ):  $\delta$  = 158.1, 149.0, 148.9, 143.8, 124.1, 121.5, 116.0, 21.0, 20.6 ; IR (ATR-liquid):  $\bar{\nu}_{\text{max}}$  = 3088, 3052, 2977, 2921, 1596, 1558, 1467, 1451, 901, 827  $\text{cm}^{-1}$ ; HRMS (EI):  $m/z$ :  $[\text{M}+\text{H}]^+$  Calcd for  $\text{C}_9\text{H}_{12}\text{N}$  134.0970; Found: 134.0965.

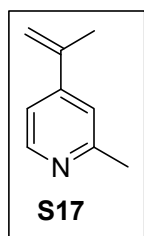

**4-Isopropenyl-2-methyl-pyridine (S17).** Prepared according to the general procedure discussed above via input of 4-bromo-2-methylpyridine (0.257 g, 1.503 mmol, 1.00 equiv),  $\text{Pd}(\text{OAc})_2$  (0.017 g, 0.076 mmol, 0.05 equiv), RuPhos (0.070 g, 0.150 mmol, 0.10 equiv),  $\text{Cs}_2\text{CO}_3$  (1.469 g, 4.509 mmol, 3.00 equiv), and 2-isopropenyl-4,4,5,5-tetramethyl-1,3,2-dioxaborolane (0.3030 g, 1.803 mmol, 1.20 equiv);  $R_f$  = 0.40, 35% ethyl acetate:hexanes ; purified using automated flash column chromatography on a normal phase silica gel column with an ethyl acetate:hexanes gradient mobile phase ; isolated yield 0.146 g, 73%; amber oil;  $^1\text{H}$  NMR (500 MHz,  $\text{CDCl}_3$ ):  $\delta$  = 8.46–8.42 (m, 1H), 7.25–7.16 (m, 2H), 5.56 (br-d,  $J$  = 4.3 Hz, 1H), 5.30–5.25 (m, 1H), 2.60 (d,  $J$  = 6.4 Hz, 3H), 2.13 (s, 3H) ;  $^{13}\text{C}\{^1\text{H}\}$  NMR (125 MHz,  $\text{CDCl}_3$ ):  $\delta$  = 157.9, 149.7, 148.1, 141.0, 120.1, 117.7, 116.3, 23.9, 20.9 ; IR (ATR-liquid):  $\bar{\nu}_{\text{max}}$  = 3087, 2975, 2923, 2857, 1598, 1542, 1442, 1406, 1381, 905, 840  $\text{cm}^{-1}$ ; HRMS (EI):  $m/z$ :  $[\text{M}+\text{H}]^+$  Calcd for  $\text{C}_9\text{H}_{12}\text{N}$  134.0970; Found: 134.0965.

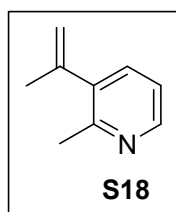

**3-Isopropenyl-2-methyl-pyridine (S18).** Prepared according to the general procedure discussed above via input of 3-bromo-2-methylpyridine pyridine (0.257 g, 1.503 mmol, 1.00 equiv),  $\text{Pd}(\text{OAc})_2$  (0.017 g, 0.076 mmol, 0.05 equiv), RuPhos (0.070 g, 0.150 mmol, 0.10 equiv),  $\text{Cs}_2\text{CO}_3$  (1.469 g, 4.509 mmol, 3.00 equiv), and 2-isopropenyl-4,4,5,5-tetramethyl-1,3,2-dioxaborolane (0.3030 g, 1.803 mmol, 1.20 equiv),  $R_f$  = 0.33, 5% methanol:dichloromethane ; purified using automated flash column chromatography on a normal phase silica gel column with a methyl-*tert*-butyl ether:hexanes gradient mobile phase ; isolated yield 0.416 g, 57%; yellow powder; melting point = 175.6–176.0  $^\circ\text{C}$ ;  $^1\text{H}$  NMR (500 MHz,  $(\text{CD}_3)_2\text{CO}$ ):  $\delta$  = 8.35 (d,  $J$  = 4.6 Hz, 1H), 7.46–7.42 (m, 1H), 7.14 (dd,  $J$  = 4.9, 7.5 Hz, 1H), 5.26 (s, 1H), 4.89 (s, 1H), 2.47 (s, 3H), 2.05 (s, 3H)-overlaps with residual  $(\text{CH}_3)_2\text{CO}$  ;  $^{13}\text{C}\{^1\text{H}\}$  NMR (125 MHz,  $(\text{CD}_3)_2\text{CO}$ ):  $\delta$  = 155.5, 148.4, 145.2, 139.2, 135.9,

121.7, 116.2, 24.1, 23.0 ; IR (ATR-solid):  $\bar{\nu}_{max}$  = 3083, 3046, 2974, 2921, 2854, 1638, 1567, 1458, 1432, 1373, 1095, 901, 808, 742,  $\text{cm}^{-1}$ ; HRMS (EI):  $m/z$ :  $[\text{M}+\text{H}]^+$  Calcd for  $\text{C}_9\text{H}_{12}\text{N}$  134.0970; Found: 134.00967.

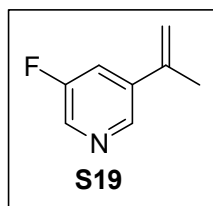

**3-Fluoro-5-isopropenyl-pyridine (S19).** Prepared according to the general procedure discussed above via input of 3-bromo-5-fluoro-pyridine (0.3000 g, 1.712 mmol, 1.00 equiv),  $\text{Pd}(\text{OAc})_2$  (0.0193 g, 0.086 mmol, 0.05 equiv), RuPhos (0.0798 g, 0.171 mmol, 0.10 equiv),  $\text{Cs}_2\text{CO}_3$  (1.6734 g, 5.136 mmol, 3.00 equiv), and 2-isopropenyl-4,4,5,5-tetramethyl-1,3,2-dioxaborolane (0.3452 g, 2.054 mmol, 1.20 equiv),  $R_f$  = 0.48, 10% methyl *tert*-butylether:hexanes ; purified using automated flash column chromatography on a normal phase silica gel column with a methyl-*tert*-butyl ether:hexanes gradient mobile phase ; isolated yield 0.1904 g, 69%; clear oil;  $^1\text{H}$  NMR (500 MHz,  $\text{CD}_3\text{CN}$ ):  $\delta$  = 8.59–8.55 (m, 1H), 8.38 (d,  $J$  = 2.7 Hz, 1H), 7.62 (ddd,  $J$  = 1.9, 2.6, 10.5 Hz, 1H), 5.54 (s, 1H), 5.29–5.25 (m, 1H), 2.16, (br-s, 3H) ;  $^{13}\text{C}\{^1\text{H}\}$  NMR (125 MHz,  $\text{CD}_3\text{CN}$ ):  $\delta$  = 160.6 (d,  $J$  = 252.2 Hz), 144.0 (d,  $J$  = 2.4 Hz), 140.7, 139.2 (d,  $J$  = 3.6 Hz), 137.4 (d,  $J$  = 23.1 Hz), 120.3 (d,  $J$  = 18.6 Hz), 116.1, 21.5 ;  $^{19}\text{F}$  NMR (471 MHz,  $\text{CD}_3\text{CN}$ ):  $\delta$  = -130.0 (d,  $J$  = -5.6 Hz) ; IR (ATR-oil):  $\bar{\nu}_{max}$  = 3733, 3627, 2598, 2923, 2853, 1457, 668  $\text{cm}^{-1}$ ; HRMS (EI):  $m/z$ :  $[\text{M}+\text{H}]^+$  Calcd for  $\text{C}_8\text{H}_9\text{FN}$  138.0719; Found: 138.0714.

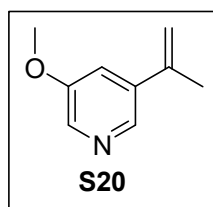

**3-Isopropenyl-5-methoxy-pyridine (S20).** Prepared according to the general procedure discussed above via input of 3-bromo-5-methoxy-pyridine (0.2510 g, 1.343 mmol, 1.00 equiv),  $\text{Pd}(\text{OAc})_2$  (0.0150 g, 0.067 mmol, 0.05 equiv), RuPhos (0.0630 g, 0.135 mmol, 0.10 equiv),  $\text{Cs}_2\text{CO}_3$  (1.312 g, 4.027 mmol, 3.00 equiv), and 2-isopropenyl-4,4,5,5-tetramethyl-1,3,2-dioxaborolane (0.271 g, 1.613 mmol, 1.20 equiv),  $R_f$  = 0.40, 20% ethyl acetate:hexanes ; purified using automated flash column chromatography on a normal phase silica gel column with an ethyl acetate:hexanes gradient mobile phase ; isolated yield 0.1863 g, 93%; yellow oil;  $^1\text{H}$  NMR (500 MHz,  $(\text{CD}_3)_2\text{CO}$ ):  $\delta$  = 8.33 (d,  $J$  = 1.3 Hz, 1H), 8.21 (d,  $J$  = 2.6 Hz, 1H), 7.41–7.39 (m, 1H), 5.51 (br-s, 1H), 5.22–5.20 (m, 1H), 3.92 (s, 3H), 2.19–2.17 (m, 3H) ;  $^{13}\text{C}\{^1\text{H}\}$  NMR (125 MHz,  $(\text{CD}_3)_2\text{CO}$ ):  $\delta$  = 156.5, 141.6, 140.1, 137.9, 137.4, 117.6, 114.7, 55.9, 21.7 ; IR (ATR-liquid):  $\bar{\nu}_{max}$  = 3093, 3044, 2968, 2941, 2841, 1629, 1585, 1567, 1453, 1417, 1305, 1254, 1048, 896, 871, 690  $\text{cm}^{-1}$ ; HRMS (EI):  $m/z$ :  $[\text{M}+\text{H}]^+$  Calcd for  $\text{C}_9\text{H}_{12}\text{NO}$  150.0919; Found: 150.0922.

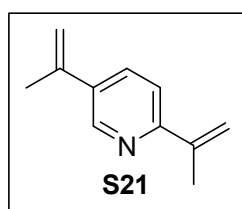

**2,5-Diisopropenyl-pyridine (S21).** Prepared according to the general procedure discussed above input of 2,5-dibromopyridine (0.2977 g, 1.257 mmol, 1.00 equiv),  $\text{Pd}(\text{OAc})_2$  (0.0281 g, 0.126 mmol, 0.05 equiv), RuPhos (0.1172 g, 0.251 mmol, 0.10 equiv),  $\text{Cs}_2\text{CO}_3$  (1.2286 g, 3.771 mmol, 3.00 equiv), and 2-isopropenyl-4,4,5,5-tetramethyl-1,3,2-dioxaborolane (0.423 g, 2.51 mmol, 1.20 equiv),  $R_f$  = 0.40, 1% methyl *tert*-butyl ether:hexanes ; purified using automated flash column chromatography on a normal phase silica gel column with a methyl-*tert*-butyl ether:hexanes gradient mobile phase ; isolated yield 0.1285 g, 61% over two steps from 2,5-dibromopyridine; red-orange oil;  $^1\text{H}$  NMR (500 MHz,  $\text{CDCl}_3$ ):  $\delta$  = 8.72 (s, 1H), 7.77–7.71 (br-m, 1H), 7.49–7.45 (br-m, 1H), 5.93–5.88 (br-m, 1H), 5.44 (s, 1H), 5.35–5.30 (br-m, 1H), 5.17 (s, 1H), 2.30 (s, 3H), 2.17 (s, 3H) ;  $^{13}\text{C}\{^1\text{H}\}$  NMR (125 MHz,  $(\text{CD}_3)_2\text{CO}$ ):  $\delta$  = 157.6, 146.8, 144.0, 141.4, 135.5, 133.7, 119.7, 115.4, 114.0, 21.5, 20.5 ; IR (ATR-liquid):  $\bar{\nu}_{max}$  = 3088, 2973, 2921, 2853, 1628, 1589, 1547, 1479, 1456, 1380  $\text{cm}^{-1}$ ; HRMS (EI):  $m/z$ :  $[\text{M}+\text{H}]^+$  Calcd for  $\text{C}_{11}\text{H}_{14}\text{N}$  160.1126; Found: 160.1133.

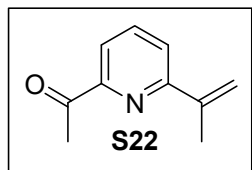

**1-(6-Isopropenyl-pyridin-2-yl)-ethanone (S22).** Prepared according to the general procedure discussed above via input of 1-(6-bromo-pyridin-2-yl)-ethanone (0.2470 g, 1.241 mmol, 1.00 equiv), Pd(OAc)<sub>2</sub> (0.0139 g, 0.062 mmol, 0.05 equiv), RuPhos (0.0579 g, 0.124 mmol, 0.10 equiv), Cs<sub>2</sub>CO<sub>3</sub> (1.214 g, 3.726 mmol, 3.00 equiv), and 2-isopropenyl-4,4,5,5-tetramethyl-1,3,2-dioxaborolane (0.2500 g, 1.488 mmol, 1.20 equiv),  $R_f = 0.60$ , 7% methyl-*tert*-butyl ether:hexanes ; purified using automated flash column chromatography on a normal phase silica gel column with a methyl-*tert*-butyl ether:hexanes gradient mobile phase ; isolated yield 0.1825 g, 92%; amber oil; <sup>1</sup>H NMR (500 MHz, CDCl<sub>3</sub>):  $\delta = 7.90$  (d,  $J = 7.7$  Hz, 1H), 7.78 (t,  $J = 7.8$  Hz, 1H), 7.66 (d,  $J = 7.9$  Hz, 1H), 5.97 (br-s, 1H), 5.38 (br-s, 1H), 2.75 (s, 3H), 2.26 (s, 3H) ; <sup>13</sup>C{<sup>1</sup>H} NMR (125 MHz, (CD<sub>3</sub>)<sub>2</sub>CO):  $\delta = 200.0, 158.1, 153.6, 143.7, 138.4, 123.8, 120.2, 116.6, 25.5, 20.4$ , one <sup>13</sup>C resonance, either overlapped, or was phased out during acquisition and not observed ; IR (ATR-liquid):  $\bar{\nu}_{max} = 3097, 2975, 2923, 1698, 1581, 1454, 1356, 1241, 1108, 822, 598$  cm<sup>-1</sup>; HRMS (EI):  $m/z$ : [M+H]<sup>+</sup> Calcd for C<sub>10</sub>H<sub>11</sub>NO 162.0919 ; Found: 162.0915.

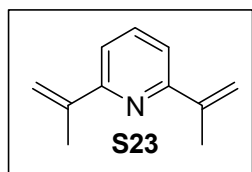

**2,6-Diisopropenyl-pyridine (S23).** Prepared according to the general procedure discussed above via input of 2,6-dibromopyridine (0.2977 g, 1.257 mmol, 1.00 equiv), Pd(OAc)<sub>2</sub> (0.0281 g, 0.126 mmol, 0.05 equiv), RuPhos (0.1172 g, 0.251 mmol, 0.10 equiv), Cs<sub>2</sub>CO<sub>3</sub> (1.2286 g, 3.771 mmol, 3.00 equiv), and 2-isopropenyl-4,4,5,5-tetramethyl-1,3,2-dioxaborolane (0.423 g, 2.51 mmol, 1.20 equiv),  $R_f = 0.60$ , 1% methyl *tert*-butyl ether:hexanes ; purified using automated flash column chromatography on a normal phase silica gel column with a methyl-*tert*-butyl ether (1:1):hexanes gradient mobile phase ; isolated yield 0.1326 g, 66% over two steps from 2,6-dibromopyridine; yellow oil; <sup>1</sup>H NMR (500 MHz, (CD<sub>3</sub>)<sub>2</sub>CO):  $\delta = 7.73$  (t,  $J = 7.9$  Hz, 1H), 7.51 (d,  $J = 7.8$  Hz, 2H), 5.96–5.94 (m, 2H), 5.31–5.29 (m, 2H), 2.22–2.20 (m, 6H) ; <sup>13</sup>C{<sup>1</sup>H} NMR (125 MHz, (CD<sub>3</sub>)<sub>2</sub>CO):  $\delta = 157.5, 144.5, 137.6, 118.8, 115.4, 20.5$  ; IR (ATR-liquid):  $\bar{\nu}_{max} = 3088, 2975, 2922, 1632, 1566, 1455, 1370, 1175, 897, 822, 747$  cm<sup>-1</sup>; HRMS (EI):  $m/z$ : [M+H]<sup>+</sup> Calcd for C<sub>11</sub>H<sub>14</sub>N 160.1126; Found: 160.1120.

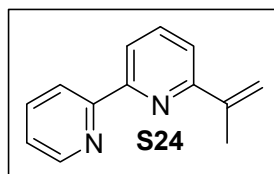

**6-Isoprenyl-[2,2']bipyridinyl (S24).** Prepared according to the general procedure discussed above input of 6-bromo-2,2'-bipyridine (0.3000 g, 1.282 mmol, 1.00 equiv), Pd(OAc)<sub>2</sub> (0.0144 g, 0.0641 mmol, 0.05 equiv), RuPhos (0.0598 g, 0.1282 mmol, 0.10 equiv), Cs<sub>2</sub>CO<sub>3</sub> (1.2531 g, 3.846 mmol, 3.00 equiv), and 2-isopropenyl-4,4,5,5-tetramethyl-1,3,2-dioxaborolane (0.2586 g, 1.539 mmol, 1.20 equiv),  $R_f = 0.65$ , 10% (9:1) ethyl acetate:methyl *tert*-butyl ether:hexanes ; purified using automated flash column chromatography on a normal phase pH 7 Al<sub>2</sub>O<sub>3</sub> column with an ethyl acetate:methyl-*tert*-butyl ether (1:1):hexanes gradient mobile phase ; isolated yield 0.1416 g, 56%-average yield over three experiments ; yellow oil; <sup>1</sup>H NMR (500 MHz, (CD<sub>3</sub>)<sub>2</sub>CO):  $\delta = 8.70$ –8.64 (m, 1H), 8.55 (d,  $J = 7.9$  Hz, 1H), 8.38 (d,  $J = 7.7$  Hz, 1H), 7.95–7.86 (m, 2H), 7.68 (d,  $J = 7.8$  Hz, 1H), 7.43–7.38 (m, 1H), 6.05 (s, 1H), 5.37 (s, 1H), 2.29 (s, 3H) ; <sup>13</sup>C NMR (125 MHz, (CD<sub>3</sub>)<sub>2</sub>CO):  $\delta = 158.0, 157.0, 155.8, 150.0, 144.3, 138.2, 137.7, 124.7, 121.4, 120.5, 119.9, 115.8, 20.6$  ; IR (ATR-solid):  $\bar{\nu}_{max} = 3060, 2976, 2921, 2857, 1634, 1579, 1563, 1472, 1456, 1428, 902, 830, 787, 753$  cm<sup>-1</sup>; HRMS (EI):  $m/z$ : [M]<sup>+</sup> Calcd for C<sub>13</sub>H<sub>13</sub>N<sub>2</sub> 197.1079; Found: 197.1072.

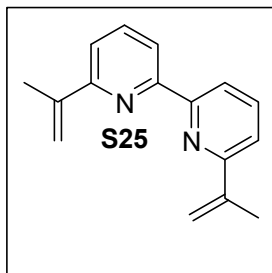

**6,6'-Diisopropenyl-[2,2']bipyridine (S25).** Prepared according to the general procedure discussed above via input of 6,6'-dibromo-[2,2']bipyridine (0.3000 g, 0.962 mmol, 1.00 equiv), Pd(OAc)<sub>2</sub> (0.0108 g, 0.048 mmol, 0.05 equiv), RuPhos (0.0449 g, 0.0962 mmol, 0.10 equiv), Cs<sub>2</sub>CO<sub>3</sub> (0.9403 g, 2.886 mmol, 3.00 equiv), and 2-isopropenyl-4,4,5,5-tetramethyl-1,3,2-dioxaborolane (0.3880 g, 2.308 mmol, 2.40 equiv), R<sub>f</sub> = 0.78, 15% acetone:hexanes ; purified using automated flash column chromatography on a normal phase silica gel column with an acetone:hexanes gradient mobile phase ; isolated yield 0.1070 g, 89% over two steps from 6,6'-dibromo-[2,2']bipyridine; white solid; melting point = 167.8–169.1 °C; <sup>1</sup>H NMR (500 MHz, CDCl<sub>3</sub>): δ = 8.43 (dd, *J* = 0.8, 7.9 Hz, 2H), 7.78 (t, *J* = 7.8 Hz, 2H), 7.50 (dd, *J* = 0.9, 7.8 Hz, 2H), 6.01–5.99 (m, 2H), 5.36–5.33 (m, 2H), 2.32–2.29 (m, 6H) ; <sup>13</sup>C {<sup>1</sup>H} NMR (125 MHz, CDCl<sub>3</sub>): δ = 157.3, 155.3, 143.6, 137.2, 119.6, 119.5, 115.5, 20.6 ; IR (ATR-solid):  $\bar{\nu}_{max}$  = 3033, 2959, 2922, 1608, 1584, 1568, 1487, 1382, 820, 536 cm<sup>-1</sup>; HRMS (EI): *m/z*: [M+H]<sup>+</sup> Calcd for C<sub>16</sub>H<sub>17</sub>N<sub>2</sub> 237.1392; Found: 237.1387.

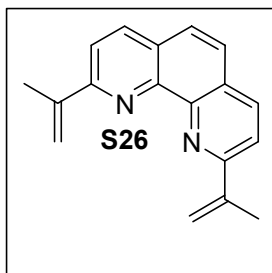

**2,9-Diisoprenyl-[1,10]phenanthroline (S26).** Prepared according to the general procedure discussed above via input of 2,9-dibromo-1,10-phenanthroline (0.3000 g, 0.893 mmol, 1.00 equiv), Pd(OAc)<sub>2</sub> (0.0100 g, 0.0447 mmol, 0.05 equiv), RuPhos (0.0417 g, 0.0893 mmol, 0.10 equiv), Cs<sub>2</sub>CO<sub>3</sub> (0.8729 g, 2.679 mmol, 3.00 equiv), and 2-isopropenyl-4,4,5,5-tetramethyl-1,3,2-dioxaborolane (0.3602 g, 2.144 mmol, 2.40 equiv), R<sub>f</sub> = 0.19, on C18 reverse-phase TLC plates MeCN:H<sub>2</sub>O (3:1) ; isolated yield 0.2052 g, 87% over two steps from 2,9-dibromo-1,10-phenanthroline ; yellow gum ; <sup>1</sup>H NMR (500 MHz, (CD<sub>3</sub>)<sub>2</sub>CO): δ = 8.37 (d, *J* = 8.4 Hz, 2H), 8.06 (d, *J* = 8.4 Hz, 2H), 7.89 (s, 2H), 6.20–6.19 (m, 2H), 5.56–5.53 (m, 2H), 2.50–2.47 (m, 6H) ; <sup>13</sup>C {<sup>1</sup>H} NMR (CD<sub>3</sub>)<sub>2</sub>CO): δ = 158.1, 146.3, 145.6, 137.0, 128.7, 126.9, 120.0, 116.8, 20.6 ; IR (ATR- CDCl<sub>3</sub>):  $\bar{\nu}_{max}$  = 3727, 2676, 2629, 2923, 2853, 1654, 1584, 1498, 1457, 1033, 854, 669 cm<sup>-1</sup>; HRMS (EI): *m/z*: Calcd for C<sub>18</sub>H<sub>17</sub>N<sub>2</sub> [M+H]<sup>+</sup> 261.1392; Found: 261.1400.

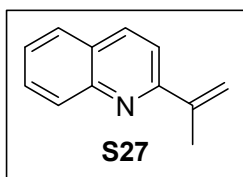

**2-Isoprenylquinoline (S27).** Prepared according to the general procedure discussed above with 2-bromoquinoline (0.3000 g, 1.449 mmol). Spectroscopic data obtained was commensurate with that previously reported.<sup>6</sup>

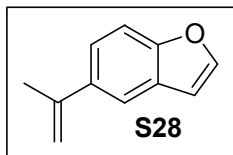

**5-isoprenylbenzofuran (S28).** Prepared to the general procedure discussed above with 5-bromobenzofuran (0.2961 g, 1.503 mmol). Spectroscopic data obtained was commensurate with that previously reported.<sup>7</sup>

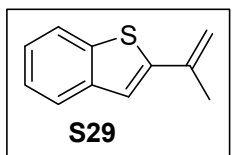

**2-Isoprenylbenzothiophene (S29).** Prepared to the general procedure discussed above with 2-bromobenzothiophene (0.3203 g, 1.503 mmol). Spectroscopic data obtained was commensurate with that previously reported.<sup>8</sup>

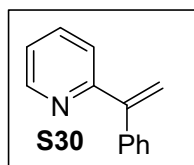

2-(1-Phenylvinyl)pyridine (**S30**). Spectroscopic data obtained was commensurate with that previously reported.<sup>9</sup>

#### Scheme S4. General procedure for Sonogashira Cross-Coupling of Scaffolds

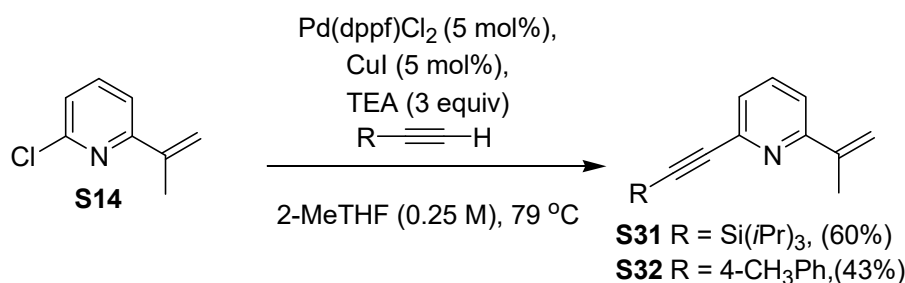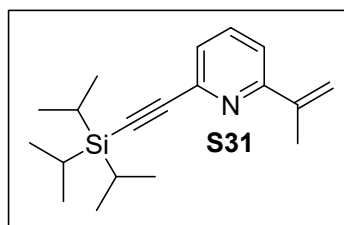

2-Isopropenyl-6-[(triisopropylsilyl)-ethynyl]-pyridine (**S31**). An adaptation of a literature procedure was helpful.<sup>10</sup> To an 8 mL reaction vial equipped with a magnetic stirring bar at ambient temperature was charged **S14** (0.0912 g, 0.596 mmol, 1.00 equiv) in anhydrous 2-methyltetrahydrofuran (2.38 mL, 0.25 M). The resulting clear solution was charged successively with Pd(dppf)Cl<sub>2</sub> (0.0218 g, 0.0298 mmol, 0.05 equiv), CuI (0.0057 g, 0.0298 mmol,

0.05 equiv), triethylamine (0.1806 g, 1.288 mmol, 3.00 equiv), and triisopropylsilyl ethyne (0.1628 g, 0.8939 mmol, 1.20 equiv) then heated to 79 °C for 12 hours until consumption of the starting material was observed on TLC then benchmarked with <sup>1</sup>H NMR spectroscopy. The crude reaction mixture was worked up as described in the reference and purified using automated flash column chromatography with a normal phase silica gel column using a ethyl acetate:hexanes gradient mobile phase to afford the title compound, R<sub>f</sub> = 0.55, 5% ethyl acetate:hexanes ; purified using automated flash column chromatography on a normal phase silica gel column with an ethyl acetate:hexanes gradient mobile phase ; isolated yield 0.1042 g, 60%; amber oil; <sup>1</sup>H NMR (500 MHz, (CD<sub>3</sub>)<sub>2</sub>CO): δ = 7.77 (t, *J* = 7.8 Hz, 1H), 7.61 (dd, *J* = 0.7, 8.0 Hz, 1H), 7.44 (dd, *J* = 0.7, 7.6 Hz, 1H), 5.94 (br-m, 1H), 5.34–5.32 (br-m, 1H), 2.18 (s, 3H), 1.23–1.14 (m, 21H) ; <sup>13</sup>C {<sup>1</sup>H} NMR (125 MHz, (CD<sub>3</sub>)<sub>2</sub>CO): δ = 159.1, 143.9, 143.0, 137.6, 127.0, 120.2, 116.4, 108.0, 90.1, 20.4, 19.0, 12.0 ; IR (ATR-liquid):  $\bar{\nu}_{\text{max}}$  = 2943, 2864, 2161, 1574, 1562, 1463, 1445, 884, 818, 727, 677, 663 cm<sup>-1</sup>; HRMS (EI): *m/z* C<sub>19</sub>H<sub>30</sub>NSi [M+H] 300.2148; Found: 300.2146.

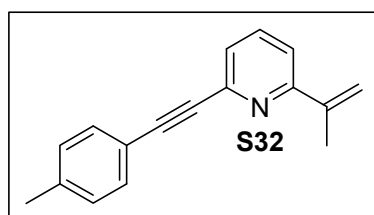

2-Isoprenyl-6-*p*-tolylethynyl-pyridine (**S32**). To an 8 mL reaction vial equipped with a magnetic stirring bar at ambient temperature was charged **S14** (0.1480 g, 0.967 mmol, 1.00 equiv) in anhydrous 2-methyltetrahydrofuran (3.87 mL, 0.25 M). The resulting clear solution was charged successively with Pd(dppf)Cl<sub>2</sub> (0.0353 g, 0.0484 mmol, 0.05 equiv), CuI (0.0092 g, 0.0484 mmol, 0.05 equiv), triethylamine (0.2933 g, 2.901 mmol, 3.00 equiv), and 4-methylphenylethyne (0.1178 g, 1.015 mmol, 1.05 equiv) then heated to 79 °C for 16 hours until consumption of the starting material was observed on TLC then benchmarked with <sup>1</sup>H NMR spectroscopy. The crude reaction

mixture was worked up as described in the reference and purified using automated flash column chromatography with a normal phase silica gel column using an ethyl acetate:hexanes gradient mobile phase to afford the title compound,  $R_f = 0.50$ , 5% ethyl acetate:hexanes ; purified using automated flash column chromatography on a normal phase silica gel column with an ethyl acetate:hexanes gradient mobile phase ;isolated yield 0.1110 g, 43%; amber liquid;  $^1\text{H NMR}$  (500 MHz,  $(\text{CD}_3)_2\text{CO}$ ):  $\delta = 7.79$  (t,  $J = 7.8$  Hz, 1H), 7.61 (dd,  $J = 0.7, 8.0$  Hz, 1H), 7.51–7.47 (m, 3H), 7.27 (d,  $J = 7.8$  Hz, 2H), 5.96–5.93 (m, 1H), 5.33–5.36 (m, 1H), 2.37 (s, 3H), 2.22–2.18 (m, 3H), ;  $^{13}\text{C NMR}$  (125 MHz,  $(\text{CD}_3)_2\text{CO}$ ):  $\delta = 159.2, 144.0, 143.4, 140.3, 137.7, 132.6, 130.2, 126.5, 120.2, 119.8, 116.4, 89.5, 88.9, 21.5, 20.5$  ; IR (ATR- $(\text{CD}_3)_2\text{CO}$ ):  $\bar{\nu}_{\text{max}} = 3081, 3055, 2978, 2954, 2923, 2213, 1575, 1561, 1508, 1446, 1167, 814, 748, 530, \text{cm}^{-1}$ ; HRMS (EI):  $m/z$ : Calcd for  $\text{C}_{17}\text{H}_{16}\text{N}$   $[\text{M}+\text{H}]^+$  234.1283; Found: 234.1283.

### Scheme S5. Preparation of Novel Pyridinyl Methyl Ketones

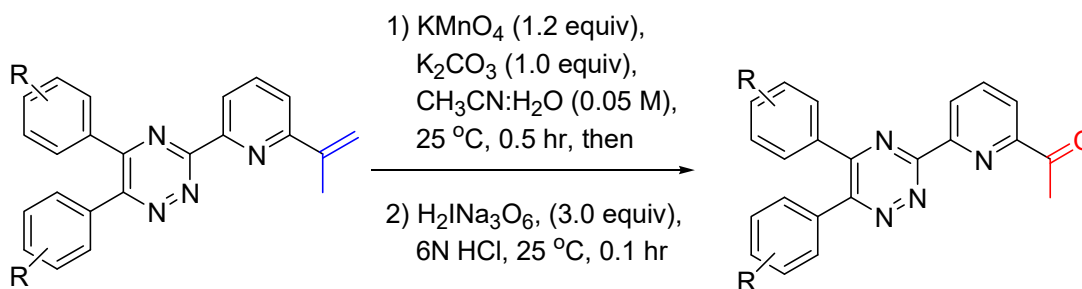

**General Procedure for Oxidative Isoprene Cleavage.** To an 8 mL reaction vial equipped with a magnetic stirring bar at ambient temperature were successively charged: the required substrate (0.285 mmol, 1.00 equiv), sodium paraperiodate (0.855 mmol, 3.00 equiv), and potassium carbonate (0.285 mmol, 1.00 equiv). The resulting mixture was slurried in a 4:1 (v:v) acetonitrile:water (0.05 M) solution followed by addition of potassium permanganate (0.342 mmol, 1.20 equiv) in one portion. The resulting mixture which possessed a pH of approximately 8–9 was continued at ambient temperature until conversion of the isoprene to the vicinal-1,2-diol was confirmed by thin layer chromatography. The reaction mixture was subsequently acidified to a pH of 3–4 with a 6.0 N aqueous hydrochloric acid solution, diluted with anhydrous dichloromethane, and subsequently quenched with a saturated aqueous sodium thiosulfate solution (3.0 mL). The biphasic mixture was filtered through a pad of Celite over normal phase silica gel flash chromatography column to remove residual manganese dioxide. The resulting filtrate was washed successively with a saturated potassium carbonate solution (2.0 mL), followed by a saturated sodium chloride solution, dried over anhydrous sodium sulfate, filtered, and then concentrated under reduced pressure at ambient temperature to afford the title compounds in the morphologies listed.

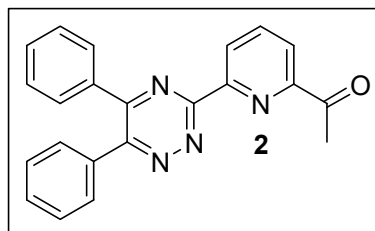

*1-[6-(5,6-Diphenyl-[1,2,4]triazin-3-yl)-pyridin-2-yl]-ethanone* (**2**). Prepared according to the general procedure discussed above with input of **6** (0.1000 g, 0.285 mmol),  $R_f = 0.22$ , 25% ethyl acetate:hexanes; isolated yield 0.0823 g, 82%; yellow solid; melting point =  $147.5\text{--}148.9\text{ }^\circ\text{C}$ ;  $^1\text{H NMR}$  (500 MHz,  $\text{CDCl}_3$ ):  $\delta = 8.84$  (d,  $J = 7.8$  Hz, 1H), 8.23 (d,  $J = 7.7$  Hz, 1H), 8.09 (t,  $J = 7.7$  Hz, 1H), 7.73 (d,  $J = 7.8$  Hz, 2H), 7.67 (d,  $J = 7.7$  Hz, 2H), 7.51–7.45 (m, 2H), 7.44–7.37 (m, 4H), 2.93 (s, 3H) ;  $^{13}\text{C}\{^1\text{H}\}$  NMR (125 MHz,  $(\text{CD}_3)_2\text{SO}$ ):  $\delta = 200.4$ ,

160.3, 156.7, 156.2, 154.2, 152.5, 138.2, 135.6, 135.3, 131.2, 130.13, 130.08, 129.7, 128.9, 128.8, 127.5, 123.2, 25.9; IR (ATR-solid):  $\bar{\nu}_{max}$  = 3060, 2956, 2924, 1699, 1581, 1493, 1446, 1385, 1362, 1242, 771, 699  $\text{cm}^{-1}$ ; HRMS (EI):  $m/z$ :  $[M]^+$  Calcd for  $\text{C}_{22}\text{H}_{16}\text{N}_4\text{O}$  352.1324; Found: 352.1324.

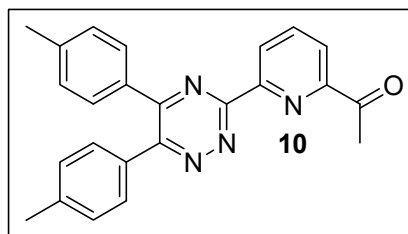

*1-[6-(5,6-Di-p-tolyl-[1,2,4]triazin-3-yl)-pyridin-2-yl]-ethanone (10)*. Prepared according to the general procedure discussed above with input of **S7** (0.5640 g, 1.491 mmol),  $R_f$  = 0.29, 25% ethyl acetate:hexanes; isolated yield 0.4263 g, 74%; yellow solid; melting point = 185.1–186.8  $^{\circ}\text{C}$ ;  $^1\text{H}$  NMR (500 MHz,  $(\text{CD}_3)_2\text{CO}$ ):  $\delta$  = 8.82 (dd,  $J$  = 1.2, 7.7 Hz, 1H), 8.26 (t,  $J$  = 7.8 Hz, 1H), 8.19 (dd,  $J$  = 1.1, 7.7 Hz, 1H), 7.69–7.66 (m, 2H), 7.61–

7.57 (m, 2H), 7.31–7.27 (m, 2H), 7.26–7.24 (m, 2H), 2.81 (s, 3H), 2.41 (s, 3H), 2.39 (s, 3H);  $^{13}\text{C}\{^1\text{H}\}$  NMR (125 MHz,  $(\text{CD}_3)_2\text{CO}$ ):  $\delta$  = 199.8, 161.0, 157.4, 156.5, 154.9, 153.9, 142.1, 140.6, 139.2, 134.1, 134.X (overlaps with 134.1), 130.8, 130.3, 130.1, 130.0, 128.0, 123.2, 25.6, 21.4, 21.3; IR (ATR- $\text{CDCl}_3$ ):  $\bar{\nu}_{max}$  = 3032, 2921, 1699, 1609, 1583, 1493, 1384, 1360, 1241, 1185, 1091, 911, 820, 733, 592, 538  $\text{cm}^{-1}$ ; HRMS (EI):  $m/z$ :  $[M+\text{Na}]^+$  Calcd for  $\text{C}_{24}\text{H}_{20}\text{N}_4\text{ONa}$  403.1535; Found: 403.1529.

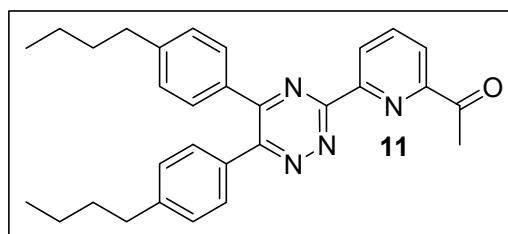

*1-[6-[5,6-Bis-(4-butyl-phenyl)-[1,2,4]triazin-3-yl]-pyridin-2-yl]-ethanone (11)*. Prepared according to the general procedure discussed above with input of **S8** (0.3015 g, 652  $\mu\text{mol}$ ),  $R_f$  = 0.37, 25% ethyl acetate:hexanes; isolated yield 0.1578 g, 52%; yellow solid; melting point = 79.8–81.3  $^{\circ}\text{C}$ ;  $^1\text{H}$  NMR (500 MHz,  $(\text{CD}_3)_2\text{CO}$ ):  $\delta$  = 8.82 (dd,  $J$  = 0.8, 7.7 Hz, 1H), 8.25 (t,  $J$

= 7.7 Hz, 1H), 8.18 (dd,  $J$  = 0.9, 7.7 Hz, 1H), 7.71–7.67 (m, 2H), 7.62–7.59 (m, 2H), 7.32–7.28 (m, 2H), 7.27–7.25 (m, 2H), 2.80 (s, 3H), 2.71–2.65 (m, 4H), 1.69–1.57 (m, 4H), 1.42–1.31 (m, 4H), 0.97–0.90 (m, 6H);  $^{13}\text{C}\{^1\text{H}\}$  NMR (125 MHz,  $(\text{CD}_3)_2\text{CO}$ ):  $\delta$  = 199.9, 161.0, 157.5, 156.5, 154.9, 153.9, 147.0, 145.6, 139.2, 134.32, 134.30, 130.9, 130.4, 129.5, 129.4, 128.0, 123.3, 36.02, 36.00, 34.2, 34.1, 25.7, 23.0, 22.9X (overlaps with 23.0), 14.20, 14.16; IR (ATR-solid):  $\bar{\nu}_{max}$  = 3174,  $\text{cm}^{-1}$ ; HRMS (EI):  $m/z$ :  $[M+\text{Na}]^+$  Calcd for  $\text{C}_{30}\text{H}_{32}\text{N}_4\text{ONa}$  487.2474; Found: 487.2471.

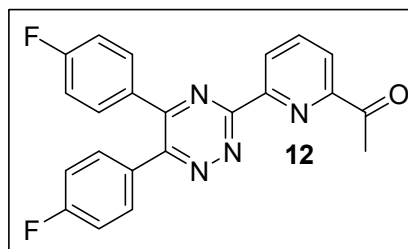

*1-[6-[5,6-Bis-(4-fluoro-phenyl)-[1,2,4]triazin-3-yl]-pyridin-2-yl]-ethanone (12)*. Prepared according to the general procedure discussed above with input of **S9** (0.6100 g, 1.990 mmol),  $R_f$  = 0.20, 25% ethyl acetate:hexanes; isolated yield 0.0373 g, 48%; yellow solid; melting point = 186.8–188.4  $^{\circ}\text{C}$ ;  $^1\text{H}$  NMR (500 MHz,  $(\text{CD}_3)_2\text{SO}$ ):  $\delta$  = 8.78 (dd,  $J$  = 0.9, 7.8 Hz, 1H), 8.29 (t,  $J$  = 7.8 Hz, 1H), 8.19 (dd,  $J$  = 1.0, 7.7 Hz, 1H), 7.73–7.69 (m, 2H),

7.36–7.30 (m, 4H), 2.78 (s, 3H);  $^{13}\text{C}\{^1\text{H}\}$  NMR (125 MHz,  $(\text{CD}_3)_2\text{SO}$ ):  $\delta$  = 199.3, 164.3 ( $J$  = 289.4 Hz), 162.3 ( $J$  = 283.8 Hz), 159.9, 155.8, 155.1, 153.4, 152.1, 139.0, 132.4 ( $J$  = 35.8 Hz), 131.8 ( $J$  = 34.8 Hz), 131.7 ( $J$  = 13.0 Hz), 131.67 ( $J$  = 12.1 Hz), 127.5, 122.8, 115.8 ( $J$  = 17.7 Hz), 115.7 ( $J$  = 17.9 Hz), 25.5;  $^{19}\text{F}$  NMR (471 MHz,  $(\text{CD}_3)_2\text{SO}$ ):  $\delta$  = -109.2–-109.4 (m, 1F), -111.1–-111.3 (m, 1F); IR (ATR- $\text{CDCl}_3$ ):  $\bar{\nu}_{max}$  = 3072, 2922, 2863, 1603, 1513, 1492, 1383, 1362, 1236, 1160, 1097, 1008, 910, 841, 728, 668, 567, 546  $\text{cm}^{-1}$ ; HRMS (EI):  $m/z$ :  $[M+\text{Na}]^+$  Calcd for  $\text{C}_{22}\text{H}_{14}\text{F}_2\text{N}_4\text{ONa}$  411.1033; Found: 411.1031.

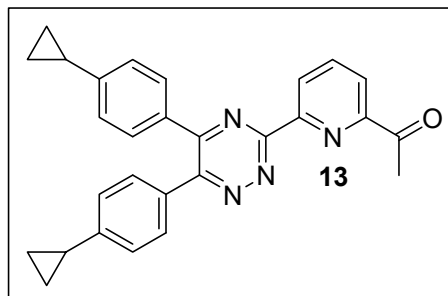

*1*-{6-[5,6-Bis-(4-cyclopropyl-phenyl)-[1,2,4]triazin-3-yl]-pyridin-2-yl}-ethanone (**13**). Prepared according to the general procedure discussed above with input of **S10** (0.6200 g, 1.441 mmol),  $R_f = 0.15$ , 25% ethyl acetate:hexanes; isolated yield 0.2081 g, 33%; yellow solid; melting point = 112.3–113.7 °C;  $^1\text{H}$  NMR (500 MHz,  $(\text{CD}_3)_2\text{CO}$ ):  $\delta = 8.09$  (d,  $J = 7.7$  Hz, 1H), 8.24 (t,  $J = 7.7$  Hz, 1H), 8.17 (d,  $J = 7.7$  Hz, 1H), 7.67 (d,  $J = 8.0$  Hz, 2H), 7.58 (d,  $J = 8.0$  Hz, 2H), 7.17 (d,  $J = 8.0$  Hz, 2H), 7.14 (d,  $J = 8.0$  Hz, 2H), 7.14 (d,  $J = 8.0$  Hz, 2H), 2.79 (s, 3H), 2.08–1.89 (m, 2H)-overlaps with residual  $(\text{CH}_3)_2\text{CO}$  resonance, 1.06–1.02 (m, 4H), 0.80–0.73 (m, 4H);  $^{13}\text{C}\{^1\text{H}\}$  NMR (125 MHz,  $(\text{CD}_3)_2\text{CO}$ ):  $\delta = 199.9, 160.4, 157.3, 156.3, 154.9, 153.9, 148.8, 147.3, 139.2, 133.9, 133.8, 130.8, 130.3, 128.0, 126.4, 126.3, 123.3, 25.7, 16.0, 15.9, 10.6, 10.4$ ; IR (ATR- $\text{CDCl}_3$ ):  $\bar{\nu}_{\text{max}} = 3086, 2992, 2959, 2921, 2853, 1695, 1610, 1493, 1358, 892, 828, 802, 598, 546$   $\text{cm}^{-1}$ ; HRMS (EI):  $m/z$ : Calcd for  $\text{C}_{28}\text{H}_{25}\text{N}_4\text{O}$   $[\text{M}+\text{H}]^+$  433.2028; Found: 433.2023.

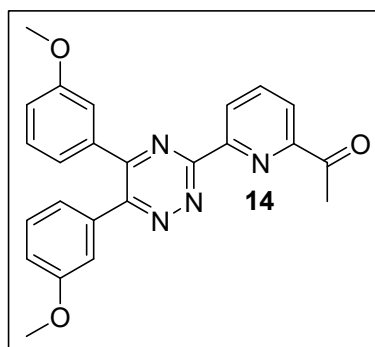

*1*-{6-[5,6-Bis-(3-methoxy-phenyl)-[1,2,4]triazin-3-yl]-pyridin-2-yl}-ethanone (**14**). Prepared according to the general procedure discussed above with input of **S11** (0.6111 g, 1.490 mmol),  $R_f = 0.15$ , 25% ethyl acetate:hexanes; isolated yield 0.1780 g, 87%; yellow solid; melting point = 139.7–141.9 °C;  $^1\text{H}$  NMR (500 MHz,  $\text{CDCl}_3$ ):  $\delta = 8.84$  (d,  $J = 7.7$  Hz, 1H), 8.23 (d,  $J = 7.7$  Hz, 1H), 8.08 (t,  $J = 7.7$  Hz, 1H), 7.37–7.27 (m, 5H), 7.19–7.15 (m, 1H), 7.05–6.98 (m, 2H), 3.79 (s, 3H), 3.74 (s, 3H), 2.92 (s, 3H);  $^{13}\text{C}\{^1\text{H}\}$  NMR (125 MHz,  $\text{CDCl}_3$ ):  $\delta = 200.3, 160.3, 160.0, 159.8, 156.5, 156.0, 154.2, 152.5, 138.2, 136.8, 136.5, 129.8, 127.4, 123.2, 122.5, 122.2, 117.4, 116.4, 114.9, 114.5, 55.5, 55.4, 25.9$ , one  $^{13}\text{C}$  resonance overlapped, or was phased out during acquisition and was not observed; IR (ATR-film):  $\bar{\nu}_{\text{max}} = 3004, 2938, 2835, 1699, 1600, 1582, 1503, 1361, 1249, 1043, 912, 734, 703$   $\text{cm}^{-1}$ ; HRMS (EI):  $m/z$ :  $[\text{M}]^+$  Calcd for  $\text{C}_{24}\text{H}_{20}\text{N}_4\text{O}_3$  412.1535; Found: 412.1530.

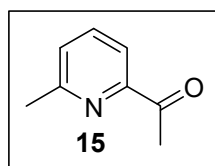

*1*-(6-Methylpyridin-2-yl)-ethanone (**15**). Prepared according to the general procedure discussed above with input of **S12** (0.0985 g, 0.740 mmol). Spectroscopic data obtained was commensurate with that previously reported.<sup>11</sup>

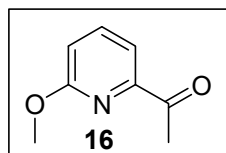

*1*-(6-Methoxypyridin-2-yl)-ethanone (**16**). Prepared according to the general procedure discussed above with input of **S13** (0.0745 g, 0.740 mmol). Spectroscopic data obtained was commensurate with that previously reported.<sup>12</sup>

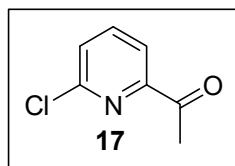

*1*-(6-Chloropyridin-2-yl)-ethanone (**17**). Prepared according to the general procedure discussed above with input of **S14** (0.0765 g, 0.500 mmol). Spectroscopic data obtained was commensurate with that previously reported.<sup>13</sup>



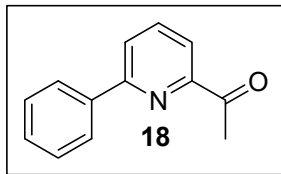

*1-(6-Phenylpyridin-2-yl)-ethanone (18)*. Prepared according to the general procedure discussed above with input of **S15** (0.0976 g, 0.500 mmol). Spectroscopic data obtained was commensurate with that previously reported.<sup>14</sup>

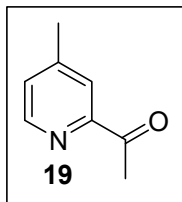

*1-(4-Methylpyridin-2-yl)-ethanone (19)*. Prepared according to the general procedure discussed above with input of **S16** (0.0665 g, 0.500 mmol). Spectroscopic data obtained was commensurate with that previously reported.<sup>15</sup>

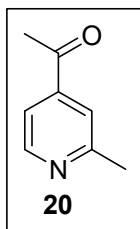

*1-(2-Methylpyridin-4-yl)-ethanone (20)*. Prepared according to the general procedure discussed above with input of **S17** (0.0665 g, 0.500 mmol). Spectroscopic data obtained was commensurate with that previously reported.<sup>16</sup>

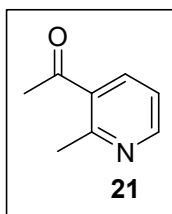

*1-(2-Methylpyridin-3-yl)-ethanone (21)*. Prepared according to the general procedure discussed above with input of **S18** (0.180 g, 1.350 mmol). Spectroscopic data obtained was commensurate with that previously reported.<sup>17</sup>

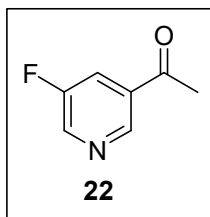

*1-(5-Fluoropyridin-3-yl)-ethanone (22)*. Prepared according to the general procedure discussed above with input of **S19** (0.2297 g, 1.676 mmol). Spectroscopic data obtained was commensurate with that previously reported.<sup>18</sup>

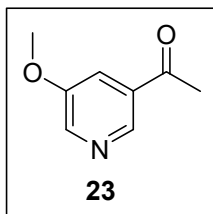

*1-(5-Methoxy-pyridin-3-yl)-ethanone (23)*. Prepared according to the general procedure discussed above with input of **S20** (0.0754 g, 0.500 mmol). Spectroscopic data obtained was commensurate with that reported.<sup>19</sup>

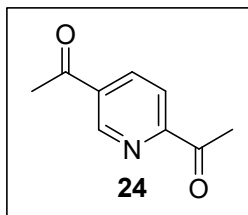

*1-(6-Acetyl-pyridin-3-yl)-ethanone (24)*. Prepared according to the general procedure discussed above with input of **S21** (0.0796 g, 0.500 mmol). This compound is commercially available.

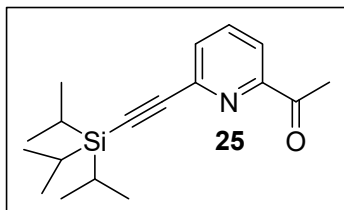

*1-{6-[(Trisopropylsilyl)-ethynyl]-pyridin-2-yl}-ethanone (25)*. Prepared according to the general procedure discussed above with input of **S31** (0.1047 g, 0.357 mmol),  $R_f = 0.41$ , 5% ethyl acetate:hexanes; isolated yield 0.0600 g, 56%; yellow oil;  $^1\text{H}$  NMR (500 MHz,  $(\text{CD}_3)_2\text{CO}$ ):  $\delta = 7.99$  (t,  $J = 7.7$  Hz, 1H), 7.96 (dt,  $J = 1.2, 7.8$  Hz, 1H), 7.78 (dt,  $J = 1.2, 7.5$  Hz, 1H), 2.63 (s, 3H), 1.22–1.14 (m, 21H);  $^{13}\text{C}\{^1\text{H}\}$  NMR (125 MHz,  $(\text{CD}_3)_2\text{CO}$ ):  $\delta = 199.2, 154.8, 143.3, 138.6, 131.8, 121.4, 106.9, 91.9, 25.5, 18.9, 12.0$ ; IR (ATR-liquid):  $\bar{\nu}_{\text{max}} = 2943, 2893, 2865, 1703, 1576, 1463, 1445, 1357, 1295, 1254, 1222, 996, 903, 883, 815$   $\text{cm}^{-1}$ ; HRMS (EI):  $m/z$ :  $[\text{M}]^+$  Calcd for  $\text{C}_{18}\text{H}_{28}\text{NOSi}$   $[\text{M}+\text{H}]$  302.1940; Found: 302.1939.

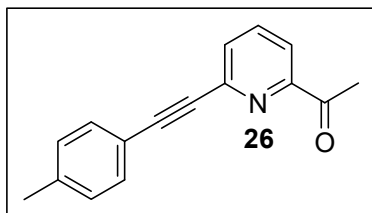

*1-(6-p-Tolylethynyl-pyridin-2-yl)-ethanone (26)*. Prepared according to the general procedure discussed above with input of **S32** (0.1064 g, 0.456 mmol). Spectroscopic data obtained was commensurate with that reported.<sup>20</sup>

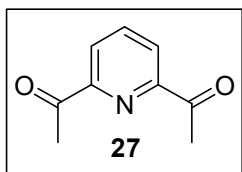

*1-(6-Acetyl-pyridin-2-yl)-ethanone (27)*. *Procedure (A)*: Prepared according to the general procedure discussed above input of **S22** (0.0796 g, 0.500 mmol). *Procedure (B)*: Prepared according to the general procedure discussed above with input of **S23** (0.0805 g, 0.500 mmol). Spectroscopic data obtained was commensurate with that previously reported.<sup>21</sup>

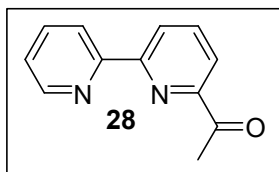

*1-[2,2']Bipyridinyl-6-yl-ethanone (28)*. Prepared according to the general procedure discussed above with input of **S24** (0.1000 g, 0.510 mmol). Spectroscopic data obtained was commensurate with that reported.<sup>22</sup>

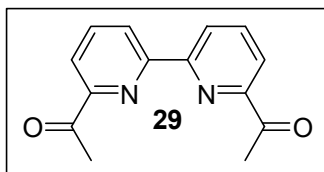

*1-(6'-Acetyl-[2,2']bipyridinyl-6-yl)-ethanone (29)*. Prepared according to the general procedure discussed above with input of **S25** (0.2457 g, 0.934 mmol). Spectroscopic data obtained was commensurate with that reported.<sup>23</sup>

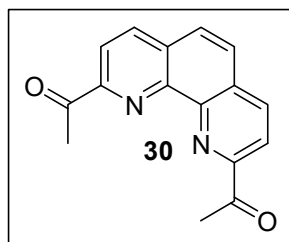

*1-(9-Acetyl-[1,10]phenanthrolin-2-yl)-ethanone (30).* Prepared according to the general procedure discussed above with input of **S26** (0.1701 g, 0.654 mmol). Spectroscopic data obtained was commensurate with that previously reported.<sup>24</sup>

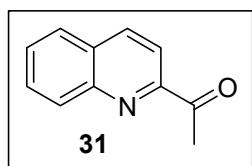

*1-Quinolin-2-yl-ethanone (31).* Prepared according to the general procedure discussed above with input of **S27** (0.0840 g, 0.498 mmol). Spectroscopic data obtained was commensurate with that previously reported.<sup>25</sup>

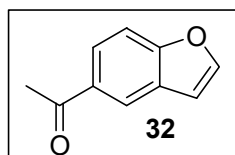

*1-Benzofuran-5-yl-ethanone (32).* Prepared according to the general procedure discussed above with input of **S28** (0.0450 g, 0.285 mmol). Spectroscopic data obtained was commensurate with that previously reported.<sup>26</sup>

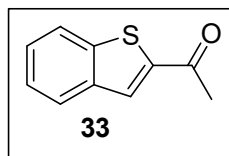

*1-Benzothiophen-2-ylethanone (33).* Prepared according to the general procedure discussed above with input of **S29** (0.0450 g, 0.285 mmol). Spectroscopic data obtained was commensurate with that previously reported.<sup>27</sup>

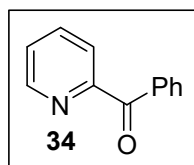

*Phenyl-pyridin-2-yl-methanone (34).* Prepared according to the general procedure discussed above input of **S30**. Spectroscopic data obtained was commensurate with that previously reported.<sup>28</sup>

<sup>1</sup> (a) Fulmer, G. R.; Miller, A. J. M.; Sherden, N. H.; Gottlieb, H. E.; Nudelman, A.; Stoltz, B. M.; Bercaw, J. E.; Goldberg, K. I. NMR Chemical Shifts of Trace Impurities: Common Laboratory Solvents, Organics, and Gases in Deuterated Solvents Relevant to the Organometallic Chemist. *Organometallics* **2010**, *29*, 2176–2179. (b) Gottlieb, H. E.; Kotlyar, V.; Nudelman, A. NMR Chemical Shifts of Common Laboratory Solvents as Trace Impurities. *Journal of Organic Chemistry* **1997**, *62*, 7512–7515.

<sup>2</sup> Chin, A.-L.; Carrick, J. D. Modular approaches to diversified soft Lewis basic complexants through Suzuki-Miyaura cross-coupling of bromoheteroarenes with organotrifluoroborates. *Journal of Organic Chemistry* **2016**, *81*, 1106–1115.

<sup>3</sup> Reference 2 above.

<sup>4</sup> Jordan, R. F.; Taylor, D. F.; Baenziger, N. C. Synthesis and Insertion Chemistry of Cationic Zirconium(IV) Pyridyl Complexes. Productive  $\sigma$ -Bond Metathesis. *Organometallics* **1990**, *9*, 1546–1557.

- <sup>5</sup> Hosokawa, A.; Katsurada, M.; Mikami, E.; Ikeda, O.; Minami, N.; Jikihara, T. Synthesis and Herbicidal Activity of N-(2-Pyridyloxiran-2-ylmethyl)benzenesulfonamide Derivatives. *Nippon Noyaku Gakkaishi* **2001**, *26*, 9–15.
- <sup>6</sup> Xu, C.; Muir, C. W.; Leach, A. G.; Kennedy, A. R.; Watson, A. J. B. Catalytic Enantioselective Synthesis of  $\alpha$ -Chiral Azaheteroaryl Ethylamines by Asymmetric Protonation. *Angewandte Chemie, International Edition* **2018**, *57*, 11374–11377.
- <sup>7</sup> Music, A.; Baumann, A.N.; Spiess, P.; Hilgert, N.; Koellen, M.F.; Didier, D. Single-Pot Access to Bisorganoborinates: Applications in Zweifel Olefination. *Organic Letters* **2019**, *21*, 2189–2193.
- <sup>8</sup> (a) Li, J.; Li, J.; He, R.; Liu, J.; Liu, Y.; Chen, L.; Huang, Y.; Li, Y. Selective Synthesis of Substituted Pyridines and Pyrimidines through Cascade Annulation of Isopropene Derivatives. *Organic Letters* **2022**, *24*, 1620–1625. (b) Wang, X.; Wang, Z.; Asanuma, Y.; Nishihara, Y.. Synthesis of 2-Substituted Propenes by Bidentate Phosphine-Assisted Methylenation of Acyl Fluorides and Acyl Chlorides with AlMe<sub>3</sub>. *Organic Letters* **2019**, *21*, 3640–3643.
- <sup>9</sup> Nuñez, An.; Abarca, B.; Cuadro, A. M.; Alvarez-Builla, J.; Vaquero, J. J. Ring-Closing Metathesis Reactions of Azinium Salts: Straightforward Access to Quinolizinium Cations and their Dihydro Derivatives. *Journal of Organic Chemistry* **2009**, *102*, 4166–4176.
- <sup>10</sup> Chaudhuri, S.; Carrick, J. D. Synthetic Access to Functionalized Dipolarophiles of Lewis Basic Complexant Scaffolds through Sonogashira Cross-Coupling. *Journal of Organic Chemistry* **2018**, *83*, 10261–10271.
- <sup>11</sup> Reeves, Z. R.; Mann, K. L. V.; Jeffery, J. C.; McCleverty, J. A.; Ward, M. D.; Barigelletti, F.; Armaroli, N. Lanthanide Complexes of a New Sterically Hindered Potentially Hexadentate Podand Ligand Based on a Tris(pyrazolyl)borate Core; Crystal Structures, Solution Structures, and Luminescence Properties. *Journal of the Chemical Society, Dalton Transactions* **1999**, 349–355.
- <sup>10</sup> Abarca, B.; Mojarred, F.; Jones, G.; Phillips, C.; Ng, N.; Wastling, J. Triazolopyridines. Part 8. Nucleophilic Substitution Reactions of 5-Bromo[1,2,3]Triazolo[5,1-a]Isoquinoline and 7-Bromo[1,2,3]-Triazolo[1,5-a]Pyridine. *Tetrahedron* **1988**, *10*, 3005–3014.
- <sup>13</sup> Trofymchuk, S.; Bugera, M.; Klipkov, A. A.; Ahunovych, V.; Razhyk, B.; Semenov, S.; Boretskyi, A.; Tarasenko, K.; Mykhailiuk, P. V. Scalable Approach to Fluorinated Heterocycles with Sulfur Tetrafluoride (SF<sub>4</sub>). *Journal of Organic Chemistry* **2021**, *86*, 12181–12198.
- <sup>14</sup> Lambert, A. E.; Carrick, J. D. Diversification of 6-Bromo-2-substituted Pyridine Derivatives via Suzuki-Miyaura Cross-Coupling: Synthetic Access to Functionalized 2-Carbonyl and Procarbonyl Pyridine Synthons. *Journal of Heterocyclic Chemistry* **2018**, *55*, 1232–1239.
- <sup>13</sup> Choi, J. S.; Kang, C. W.; Jung, K.; Yang, J. W.; Yang-Gyun, K.; Han, H. Synthesis of DNA Triangles with Vertexes of Bis(terpyridine)iron(III) Complexes. *Journal of the American Chemical Society* **2004**, *126*, 8606–8607.
- <sup>16</sup> Hay, M. P.; Torcotte, S.; Flanagan, J. V.; Bonnet, M.; Chan, D. A.; Sutphin, D. D.; Nguyen, D.; Giaccia, A. J.; Denny, W. A. 4-Pyridylaminothiazoles that Selectively Target von Hippel-Lindau Deficient Renal Cell Carcinoma. *Journal of Medicinal Chemistry* **2010**, *53* 787–797.

- 
- <sup>17</sup> Allais, C.; Lieby-Muller, F.; Rodriguez, J.; Constantieux, T. Metal-Free Michael-Addition-Initiated Three-Component Reaction for the Regioselective Synthesis of Highly Functionalized Pyridines: Scope, Mechanistic Investigations and Applications. *European Journal of Organic Chemistry* **2013**, *2013*, 4131–4145.
- <sup>18</sup> López-Iglesias, M.; González-Martínez, D.; Rodríguez-Mata, M.; Gotor, V.; Busto, E.; Kroutil, W.; Gotor-Fernández, V. Asymmetric Biocatalytic Synthesis of Fluorinated Pyridines through Transesterification or Transamination: Computational Insights into the Reactivity of Transaminases. *Advanced Synthetic Catalysis* **2017**, *359*, 279–291.
- <sup>19</sup> Reference 16.
- <sup>18</sup> Chaudhuri, S.; Carrick, J. D.\* Synthetic access to functionalized dipolarophiles of Lewis Basic Complexant Scaffolds through Sonogashira Cross-Coupling. *Journal of Organic Chemistry* **2018**, *83*, 10261–10271.
- <sup>19</sup> Kianmehr, E.; Pakbaznia, A.; Faghih, N.; Foroumadi, A. Metal-Free Chemo- and Regioselective Acylation of Pyridine Derivatives with Alcohols in Water. *Tetrahedron* **2017**, *73*, 1407–1412.
- <sup>20</sup> Xie, G.; Ai, H.; Lu, L.; Zhang, P. A Facile and Efficient Approach to the Synthesis of 2,6-Diacetylpyridine. *Journal of the Chemical Society of Pakistan* **2009**, *31*, 674–676.
- <sup>22</sup> Vlugt, J. L.; Demeshko, S.; Dechert, S.; Meyer, F. Tetranuclear Co<sup>II</sup>, Mn<sup>II</sup>, and Cu<sup>II</sup> Complexes of a Novel Binucleating Pyrazolate Ligand Preorganized for the Self-Assembly of Compact [2×2]-Grid Structures. *Inorganic Chemistry* **2008**, *47*, 1576–1585.
- <sup>23</sup> Zong, R.; Want, D.; Hammitt, R.; Thummel, R. P. Synthetic Approaches to Polypyridyl Bridging Ligands with Proximal Multidentate Binding Sites. *Journal of Organic Chemistry* **2006**, *71*, 167–175.
- <sup>24</sup> Reference 21
- <sup>25</sup> Mroczek, A.; Erre, G.; Taras, G.; Gladiali, S. Chiral Ferrocenyl Ligands with Bidentate Pyridine Donors. Synthesis and Application in Pd-Catalyzed Asymmetric Alkylation of 1,3-Diphenylpropenyl-1-esters. *Tetrahedron Asymmetry* **2010**, *21*, 1921–1927.
- <sup>26</sup> (a) Kotha, S.; Solanke, B.U.; Gupta, N.K. Design and Synthesis of C<sub>3</sub>-symmetric Molecules Containing Oxepine and Benzofuran Moieties via Metathesis. *Journal of Molecular Structure* **2021**, *1244*, 130907. (b) Lu, L.; Hua, R. A Monomer-Polymer-Monomer (MPM) Organic Synthesis Strategy: Synthesis and Application of Polybenzofuran for Functionalizing Benzene Ring of Benzofuran. *Asian Journal of Organic Chemistry* **2021**, *10*, 2137–2142.
- <sup>27</sup> Tosa, M.I.; Podea, P.V.; Paizs, C.; Irimie, Florin D. Chemoenzymatic Synthesis of (*R*)- and (*S*)-1-heteroarylethanol. *Tetrahedron* **2008**, *19*, 2068–2071.
- <sup>28</sup> Mamane, V.; Aubert, E.; Fort, Y. The Methyl Group as a Source of Structural Diversity in Heterogeneous Chemistry: Side Chain Functionalization of Picolines and Related Heterocycles. *Journal of Organic Chemistry* **2007**, *72*, 7294–7300.

3-(6-Isopropenyl-pyridin-2-yl)-6-(1-methylene-but-2-enyl)-5-phenyl-[1,2,4]triazine (6)  
AMS-A-193 (7)

8.51  
8.49  
8.06  
8.04  
8.03  
7.86  
7.85  
7.75  
7.74  
7.69  
7.68  
7.67  
7.53  
7.51  
7.50  
7.50  
7.49  
7.47  
7.46  
7.45  
7.43  
7.42  
6.14  
5.42

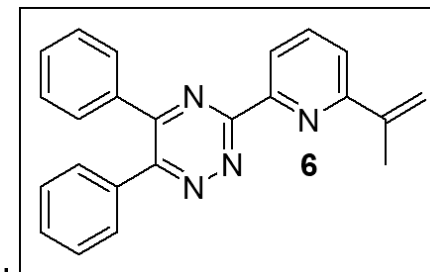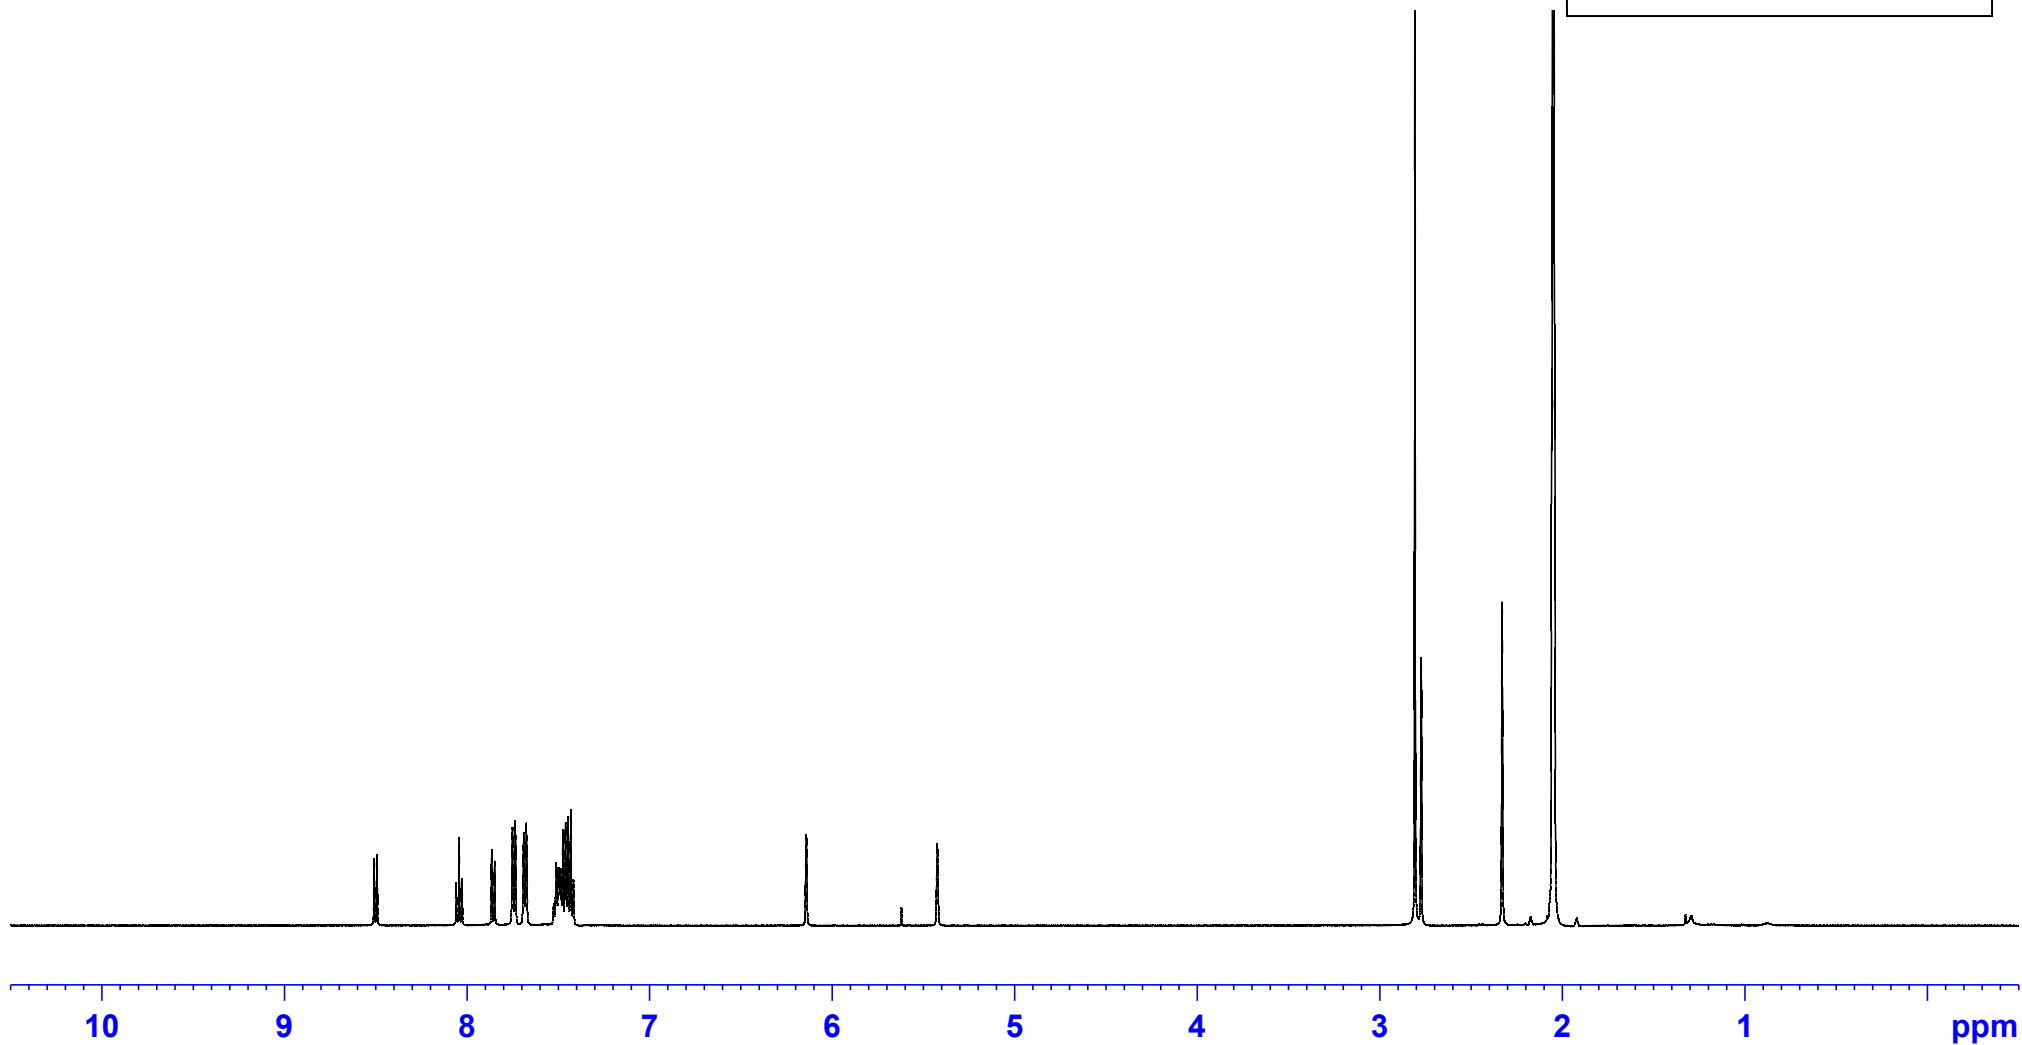

0.98  
1.03  
1.00  
1.99  
1.99  
6.12

1.00  
1.00

3.01

3-(6-Isopropenyl-pyridin-2-yl)-6-(1-methylene-but-2-enyl)-5-phenyl-[1,2,4]triazine (6)  
AMS-A-193(8)

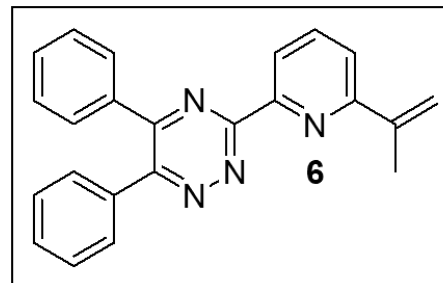

162.0  
159.2  
157.4  
156.6  
153.4  
144.2  
138.4  
137.1  
137.0  
131.5  
130.9  
130.5  
130.4  
129.4  
129.3  
123.3  
121.9  
116.5

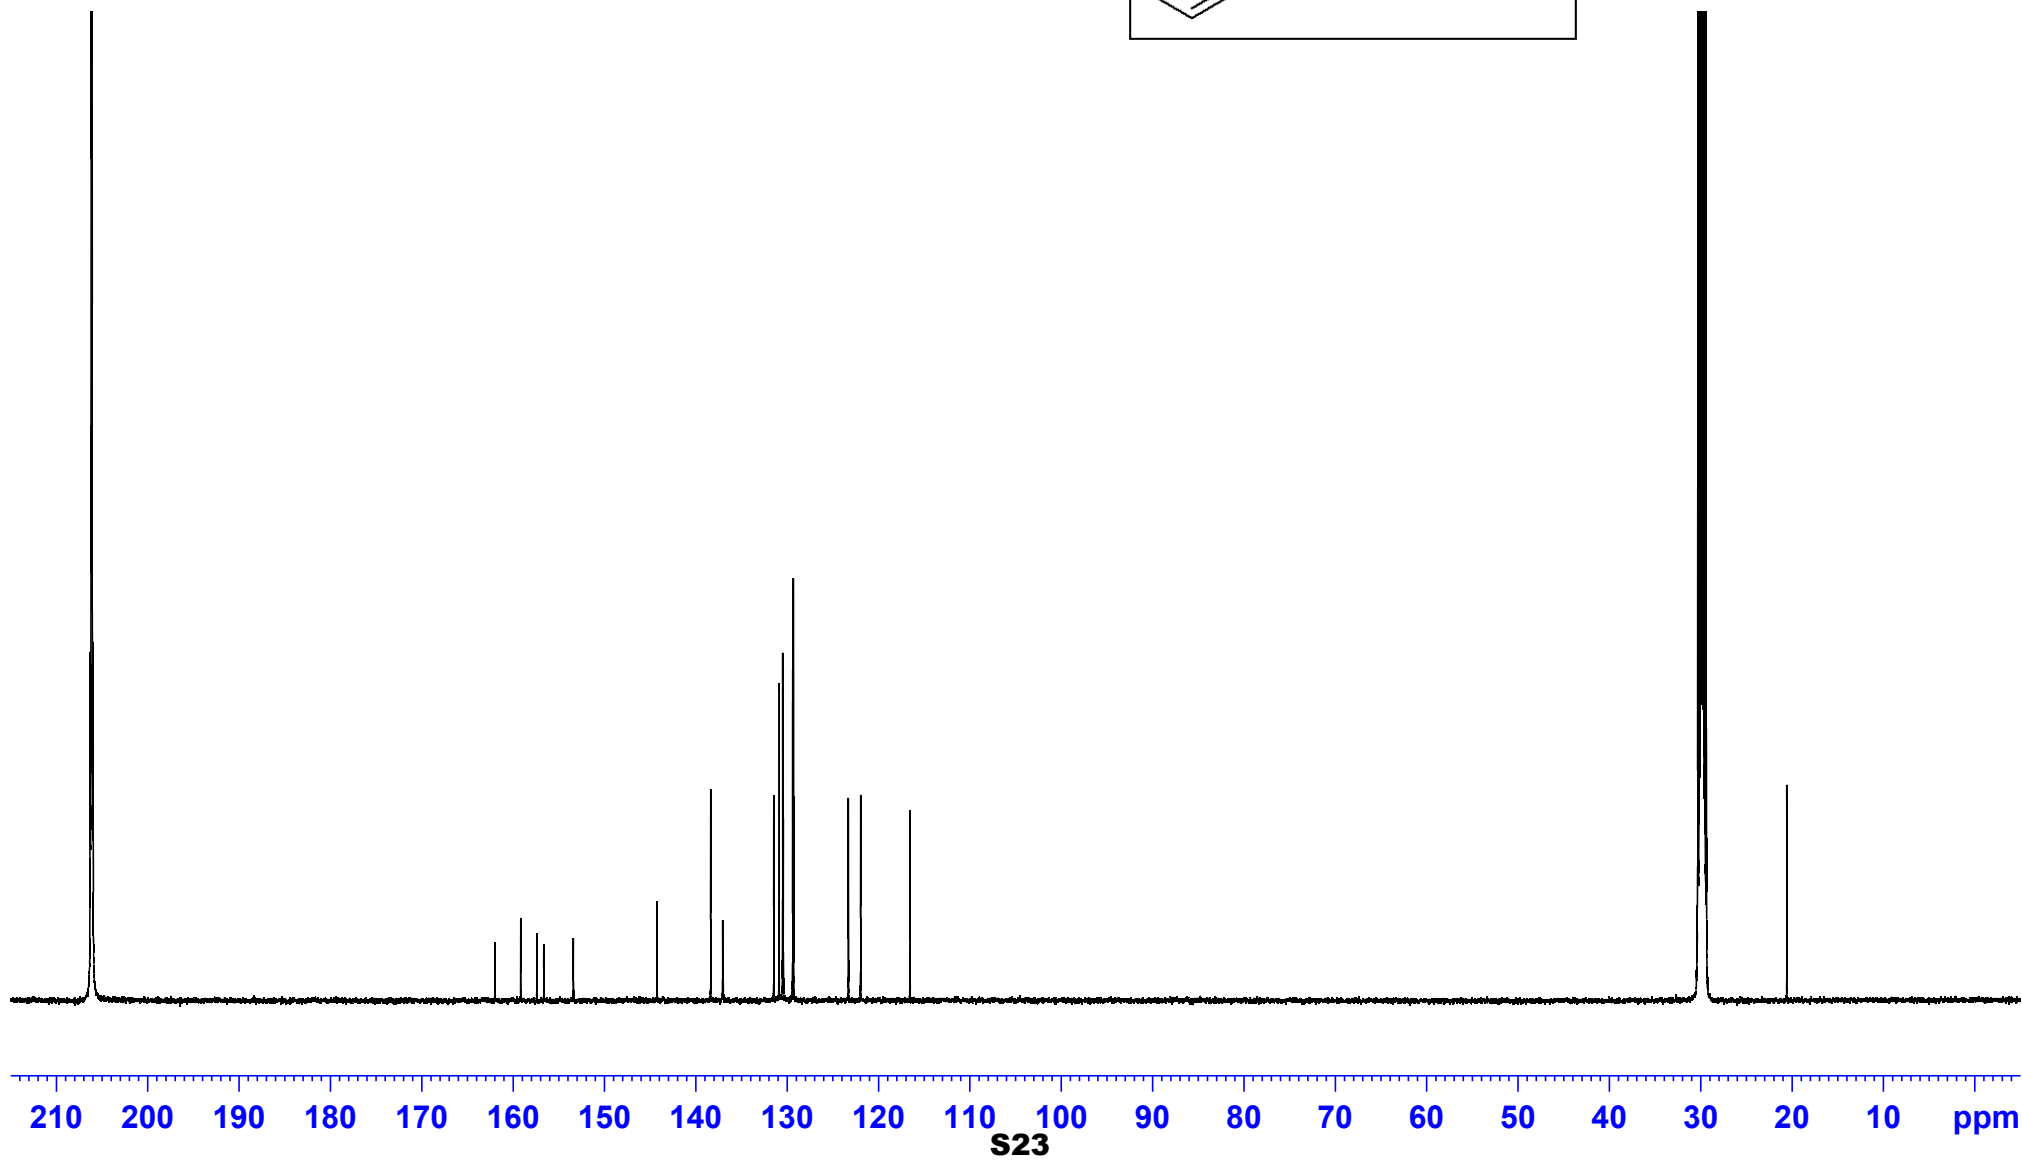

3-(6-Isopropenyl-pyridin-2-yl)-5,6-di-p-tolyl-[1,2,4]triazine (S7)  
AMS-A-231 (3)

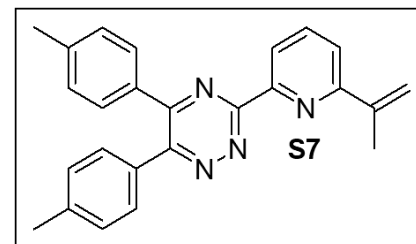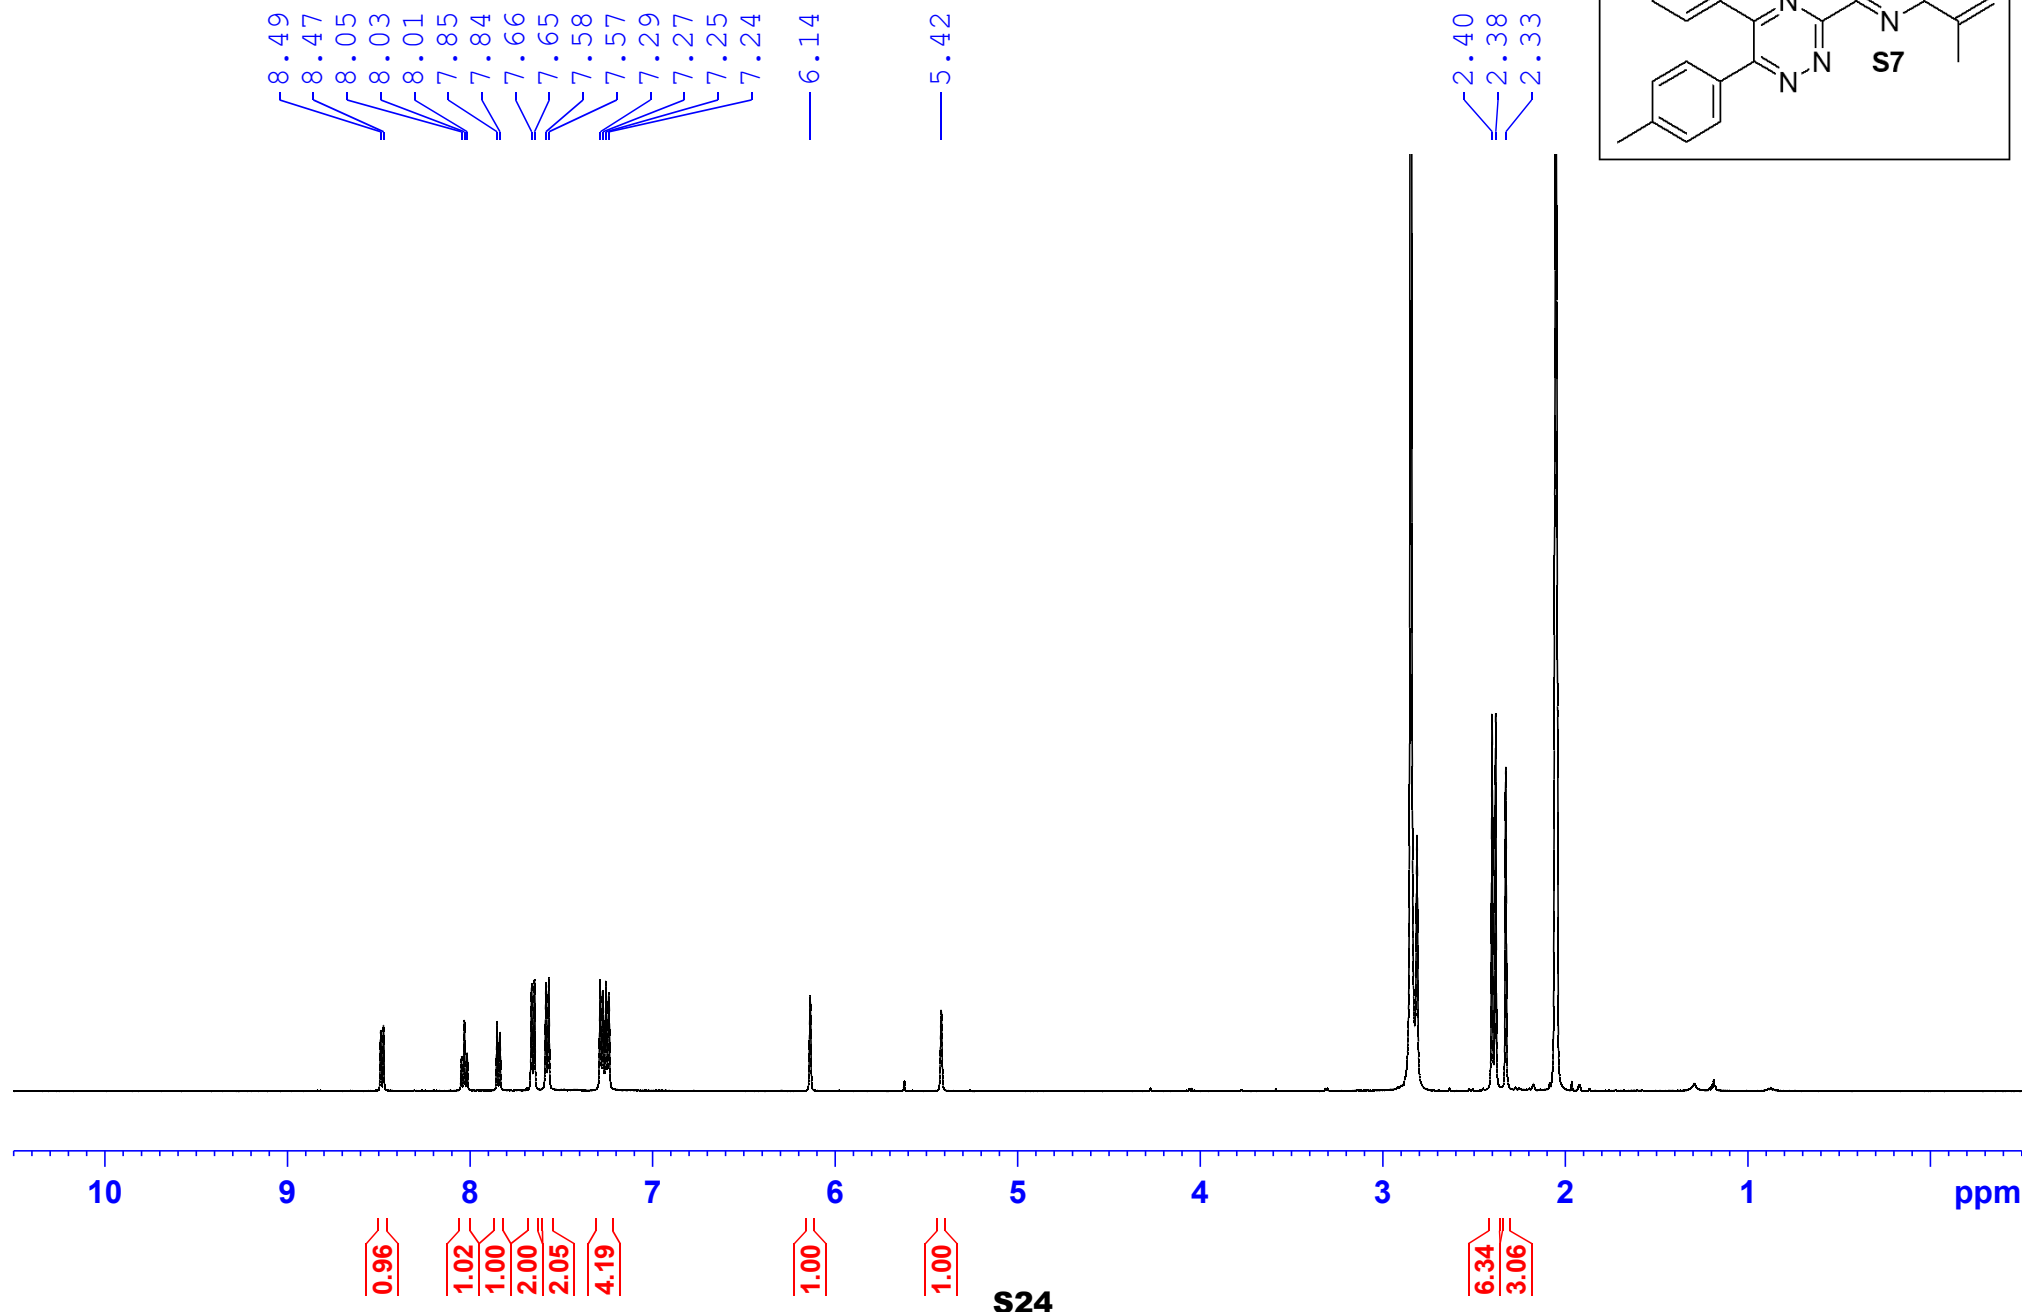

S24



3-(6-Isopropenyl-pyridin-2-yl)-5,6-di-p-tolyl-[1,2,4]triazine (S7)  
AMS-A-231(3)

161.7  
159.1  
157.2  
156.3  
153.5  
144.2  
141.9  
140.5  
138.3  
134.3  
134.3  
130.8  
130.3  
130.1  
130.0  
123.2  
121.8  
116.5

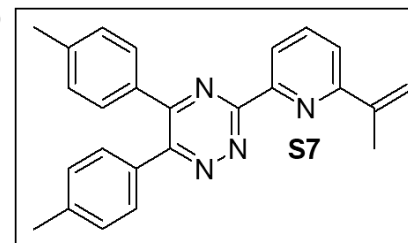

21.4  
21.3  
20.6

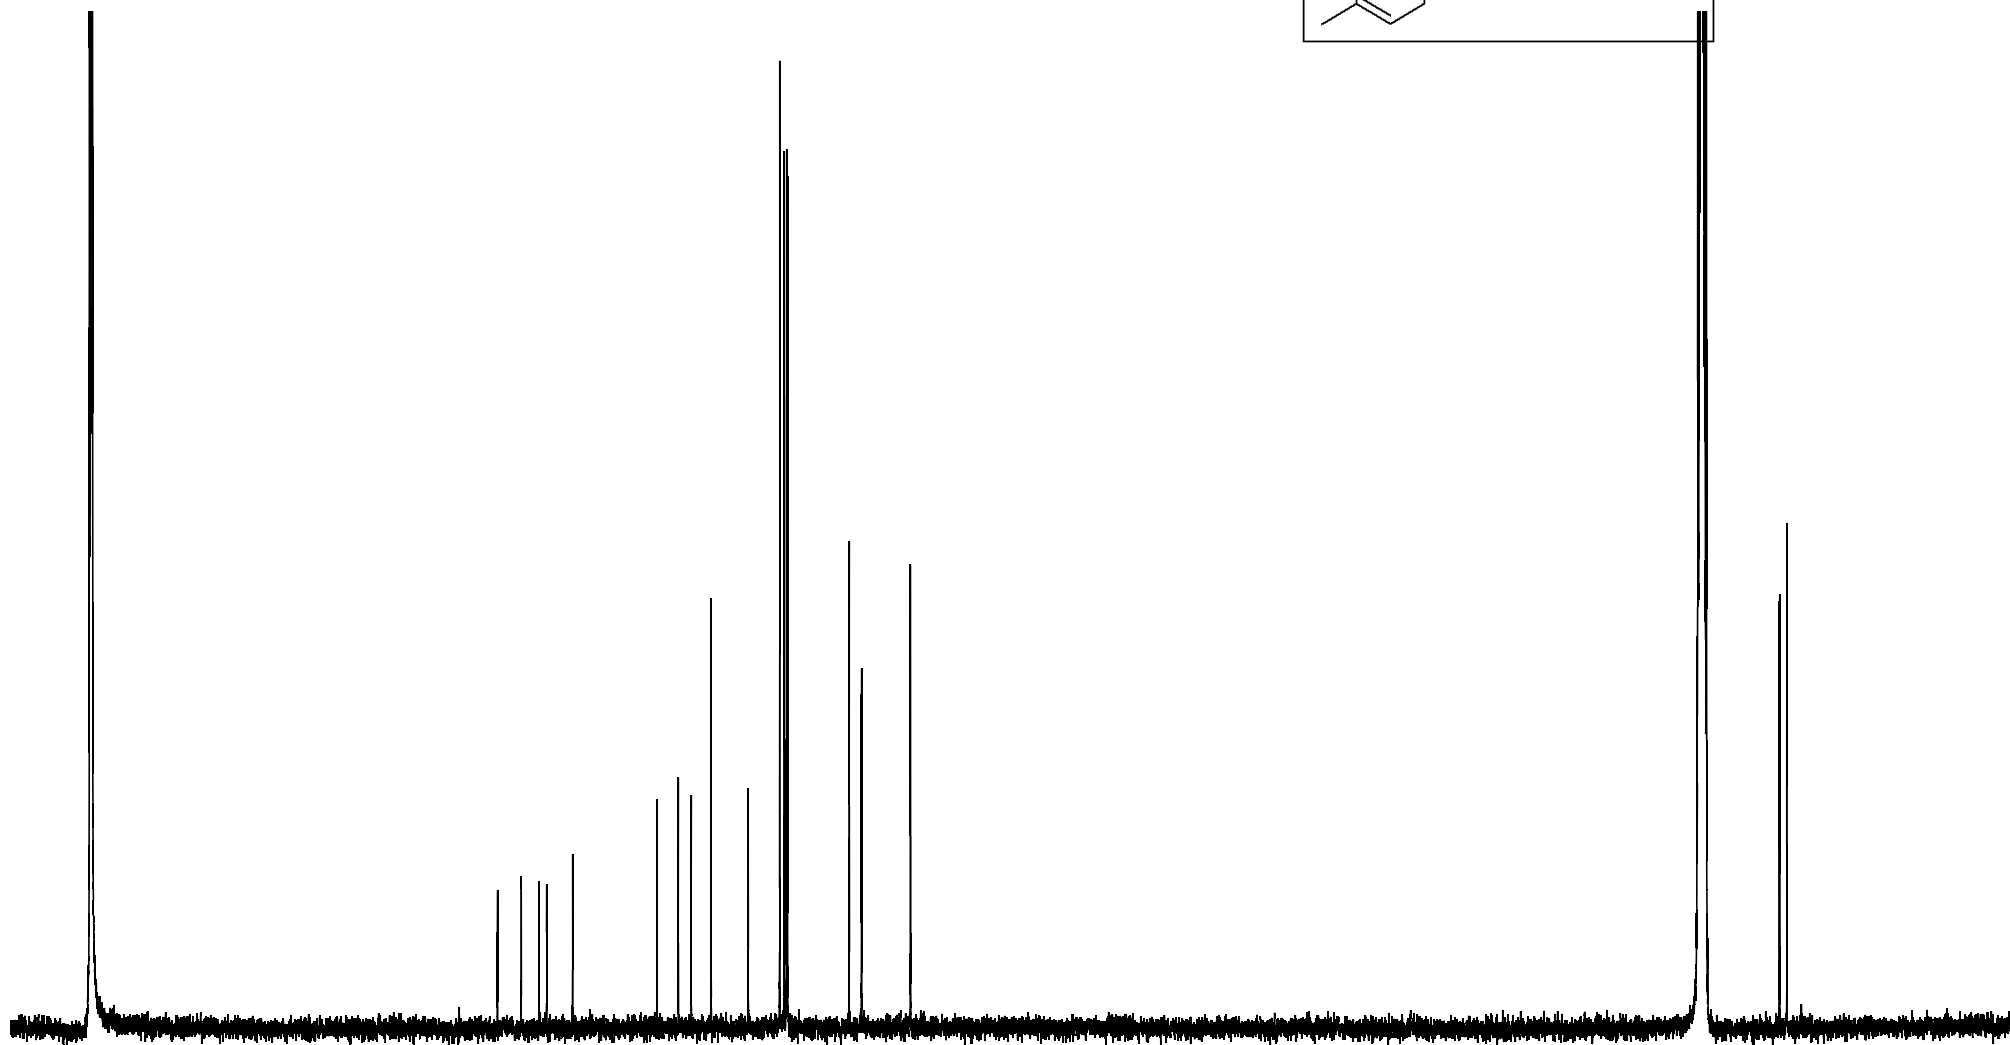

210 200 190 180 170 160 150 140 130 120 110 100 90 80 70 60 50 40 30 20 10 ppm

S25

5,6-Bis-(4-butyl-phenyl)-3-(6-isopropenyl-pyridin-2-yl)-[1,2,4]triazine (S8)  
ZZG-G-63 (2)

8.54  
8.53  
7.90  
7.88  
7.87  
7.67  
7.65  
7.59  
7.58  
7.26  
7.21  
7.20  
7.18  
7.17

6.10

5.42

2.67  
2.66  
2.64  
2.62  
2.36  
1.65  
1.63  
1.62  
1.60  
1.59  
1.38  
1.37  
1.35  
1.34  
1.27  
0.96  
0.94  
0.92  
0.91  
0.90  
0.88  
0.87

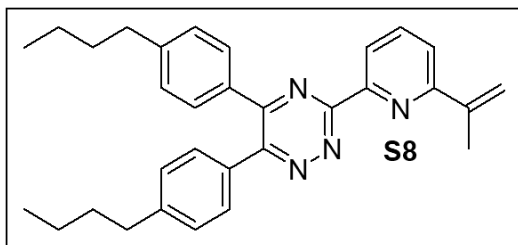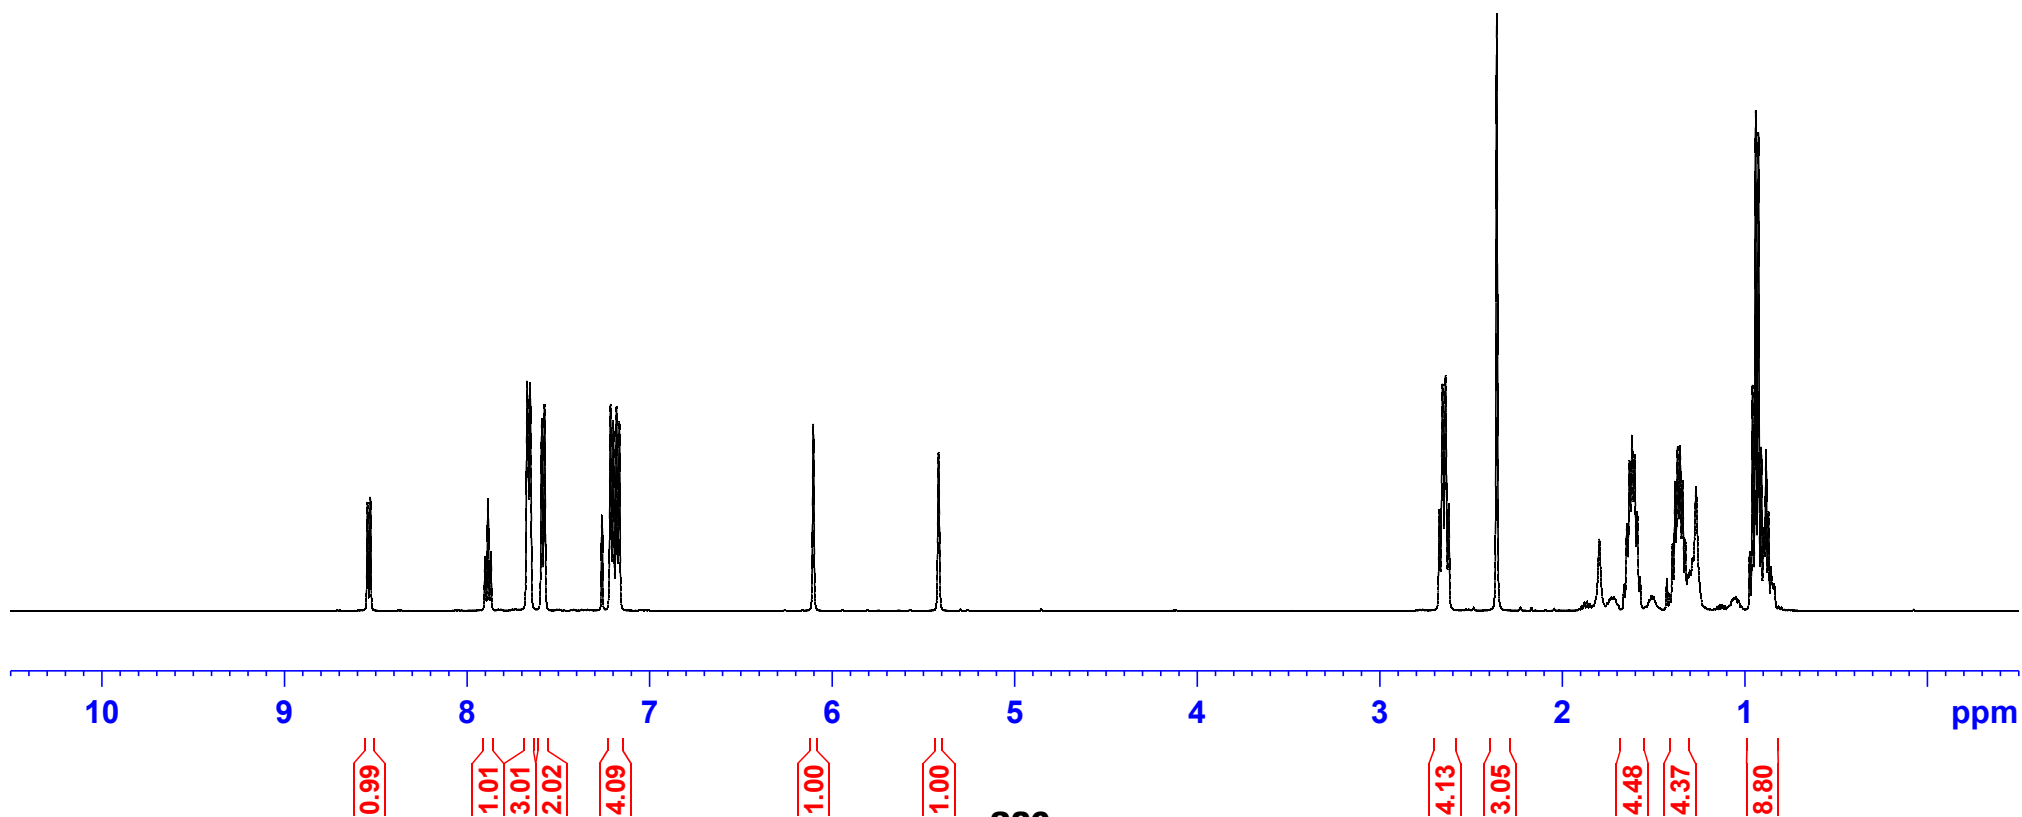

S26

5,6-Bis-(4-butyl-phenyl)-3-(6-isopropenyl-pyridin-2-yl)-[1,2,4]triazine (S8)  
ZZG-G-63 (2)

160.7  
158.9  
156.2  
155.9  
152.3  
146.3  
145.0  
143.1  
143.1  
137.4  
137.4  
133.3  
133.0  
130.1  
129.5  
128.8  
128.7  
122.5  
121.3  
116.7  
116.7

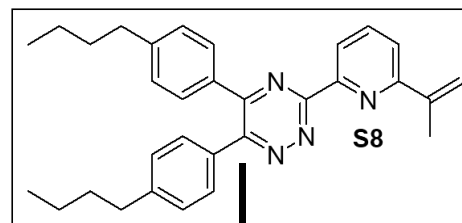

35.7  
35.6  
33.4  
33.3  
22.5  
22.4  
20.6  
14.1  
14.0

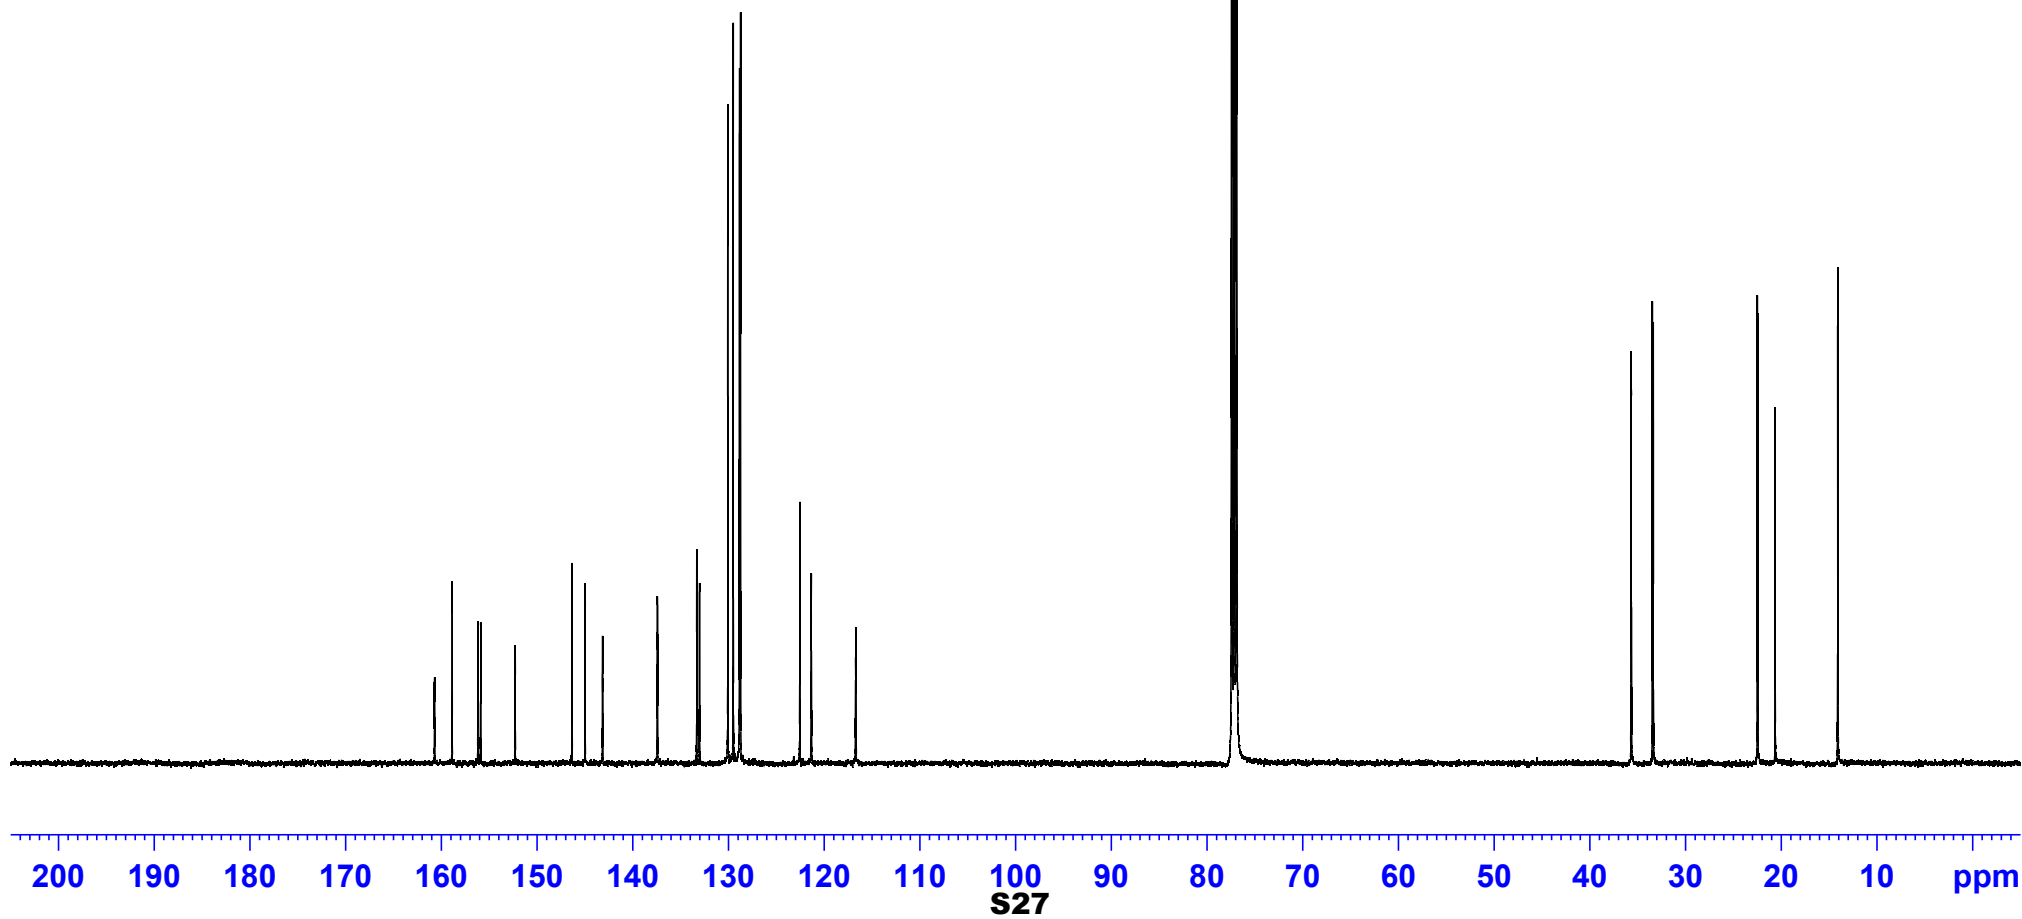

5,6-Bis-(4-fluoro-phenyl)-3-(6-isopropenyl-pyridin-2-yl)-[1,2,4]triazine (S9)  
ZZG-G-51 (2)

8.56  
8.55  
7.94  
7.93  
7.91  
7.77  
7.76  
7.76  
7.75  
7.70  
7.68  
7.67  
7.66  
7.66  
7.65  
7.14  
7.12  
7.11  
7.09  
7.08  
6.11  
5.45

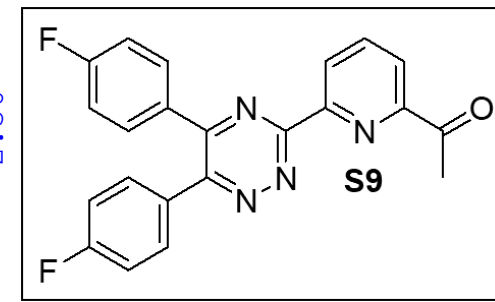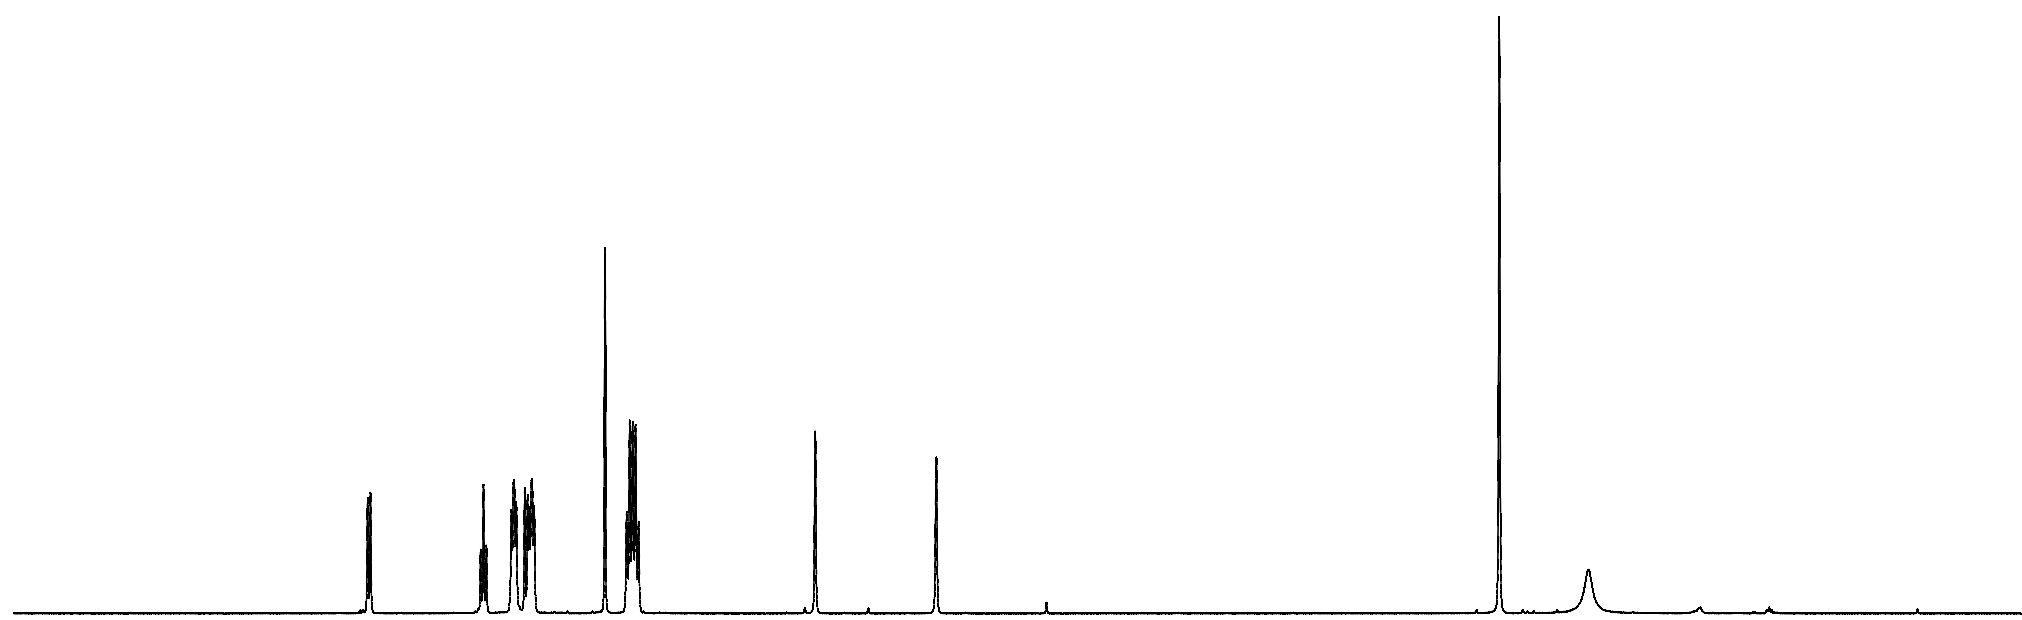

10 9 8 7 6 5 4 3 2 1 ppm

0.96  
1.04  
2.12  
3.17  
4.22  
1.00  
1.01  
3.03

S28

5,6-Bis-(4-fluoro-phenyl)-3-(6-isopropenyl-pyridin-2-yl)-[1,2,4]triazine (S9)  
ZZG-G-51(2)

165.6  
165.0  
163.6  
163.0  
160.9  
159.0  
155.2  
154.9  
151.8  
142.9  
137.7  
132.4  
132.3  
131.7  
131.7  
131.7  
131.6  
131.5  
131.5  
122.7  
121.7  
117.1  
116.3  
116.2  
116.1  
116.1

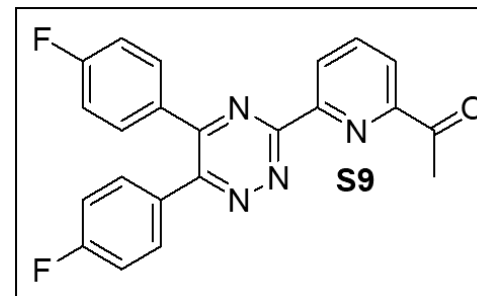

— 20.6

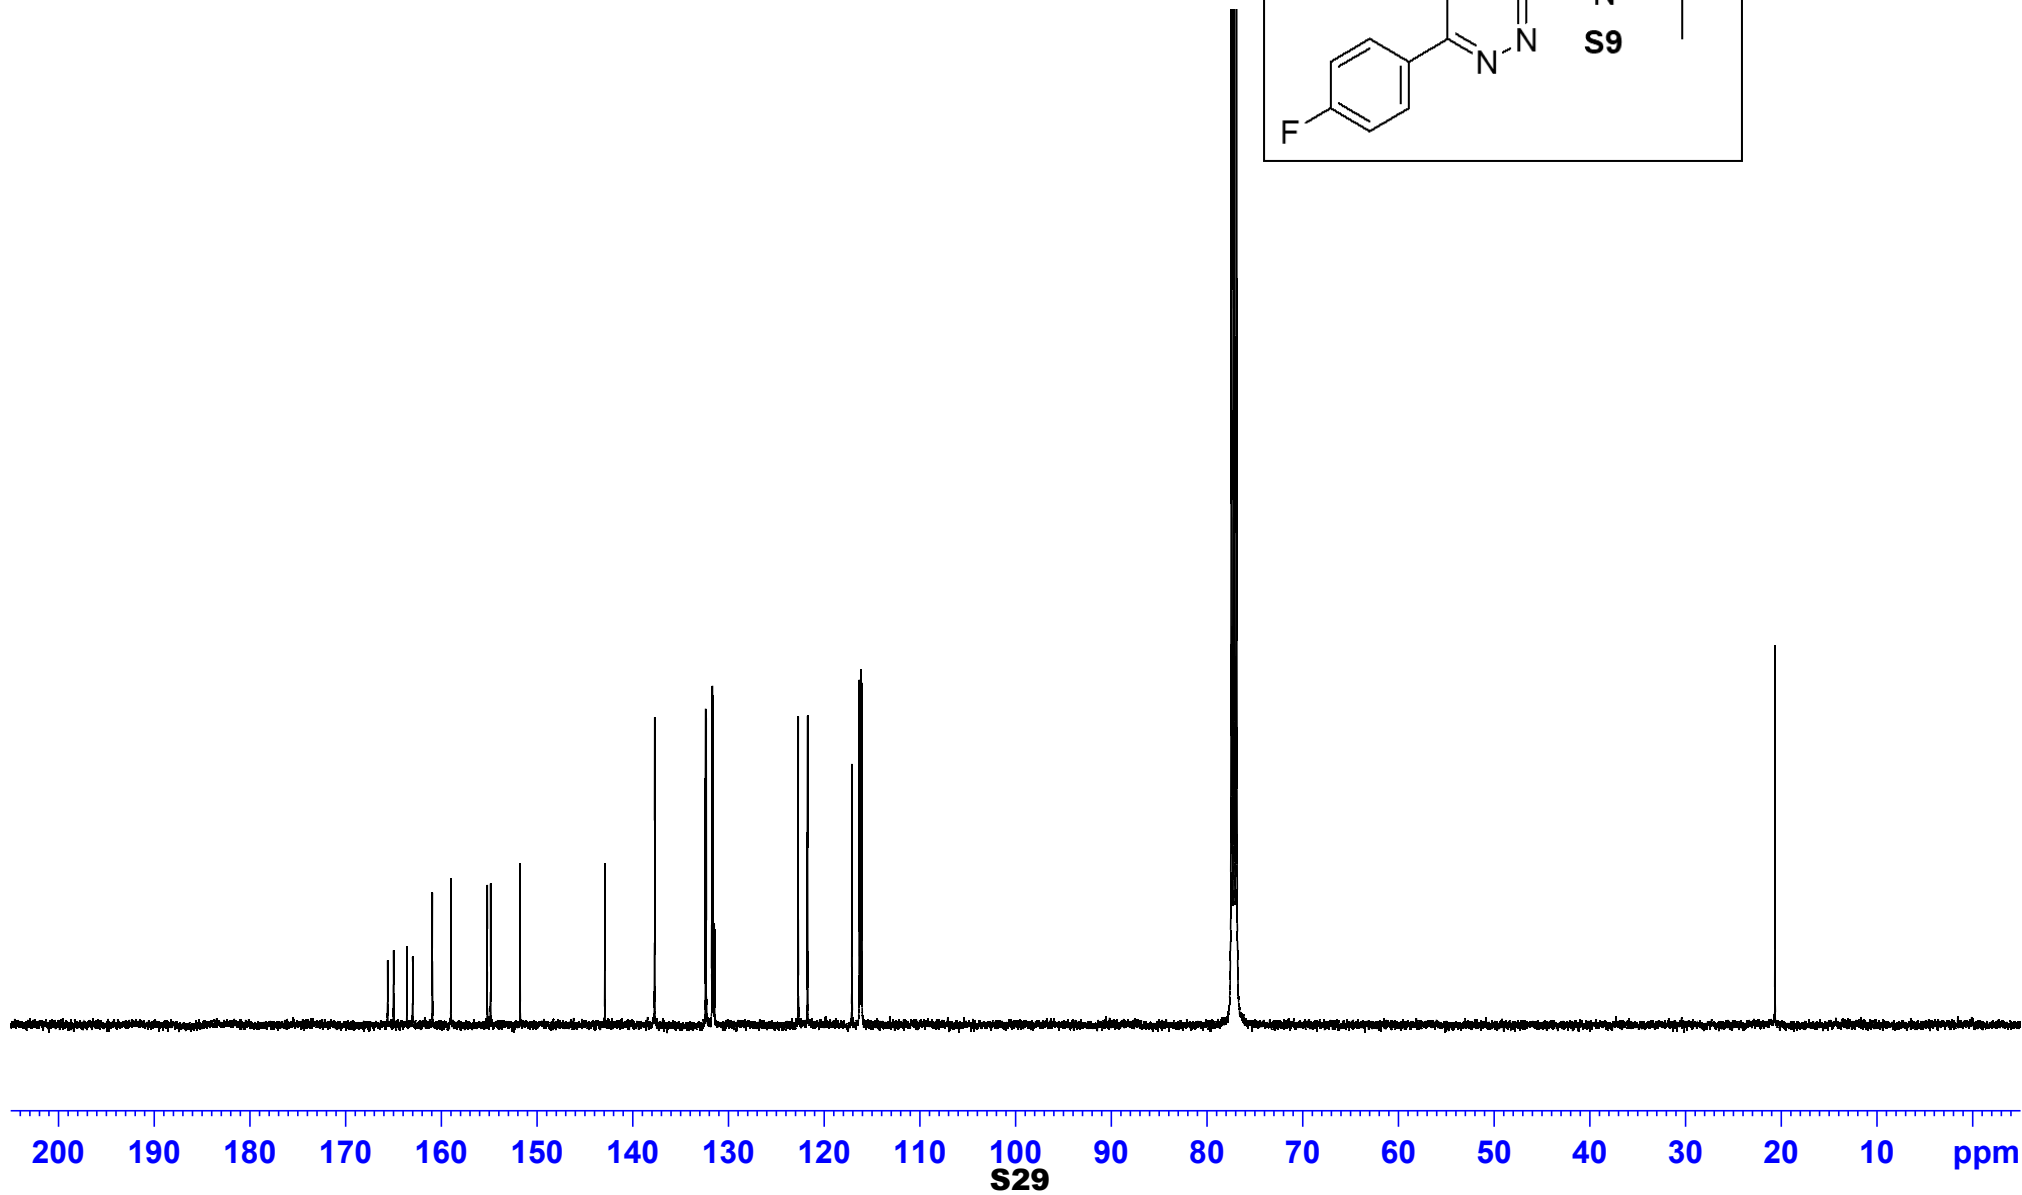

5,6-Bis-(4-fluoro-phenyl)-3-(6-isopropenyl-pyridin-2-yl)-[1,2,4]triazine (S9)  
ZZG-G-51

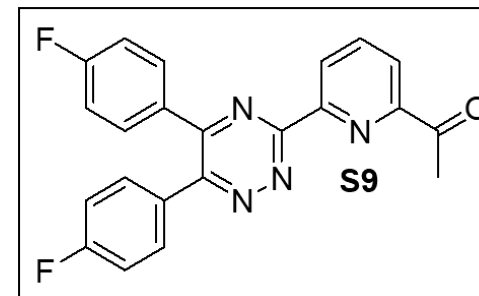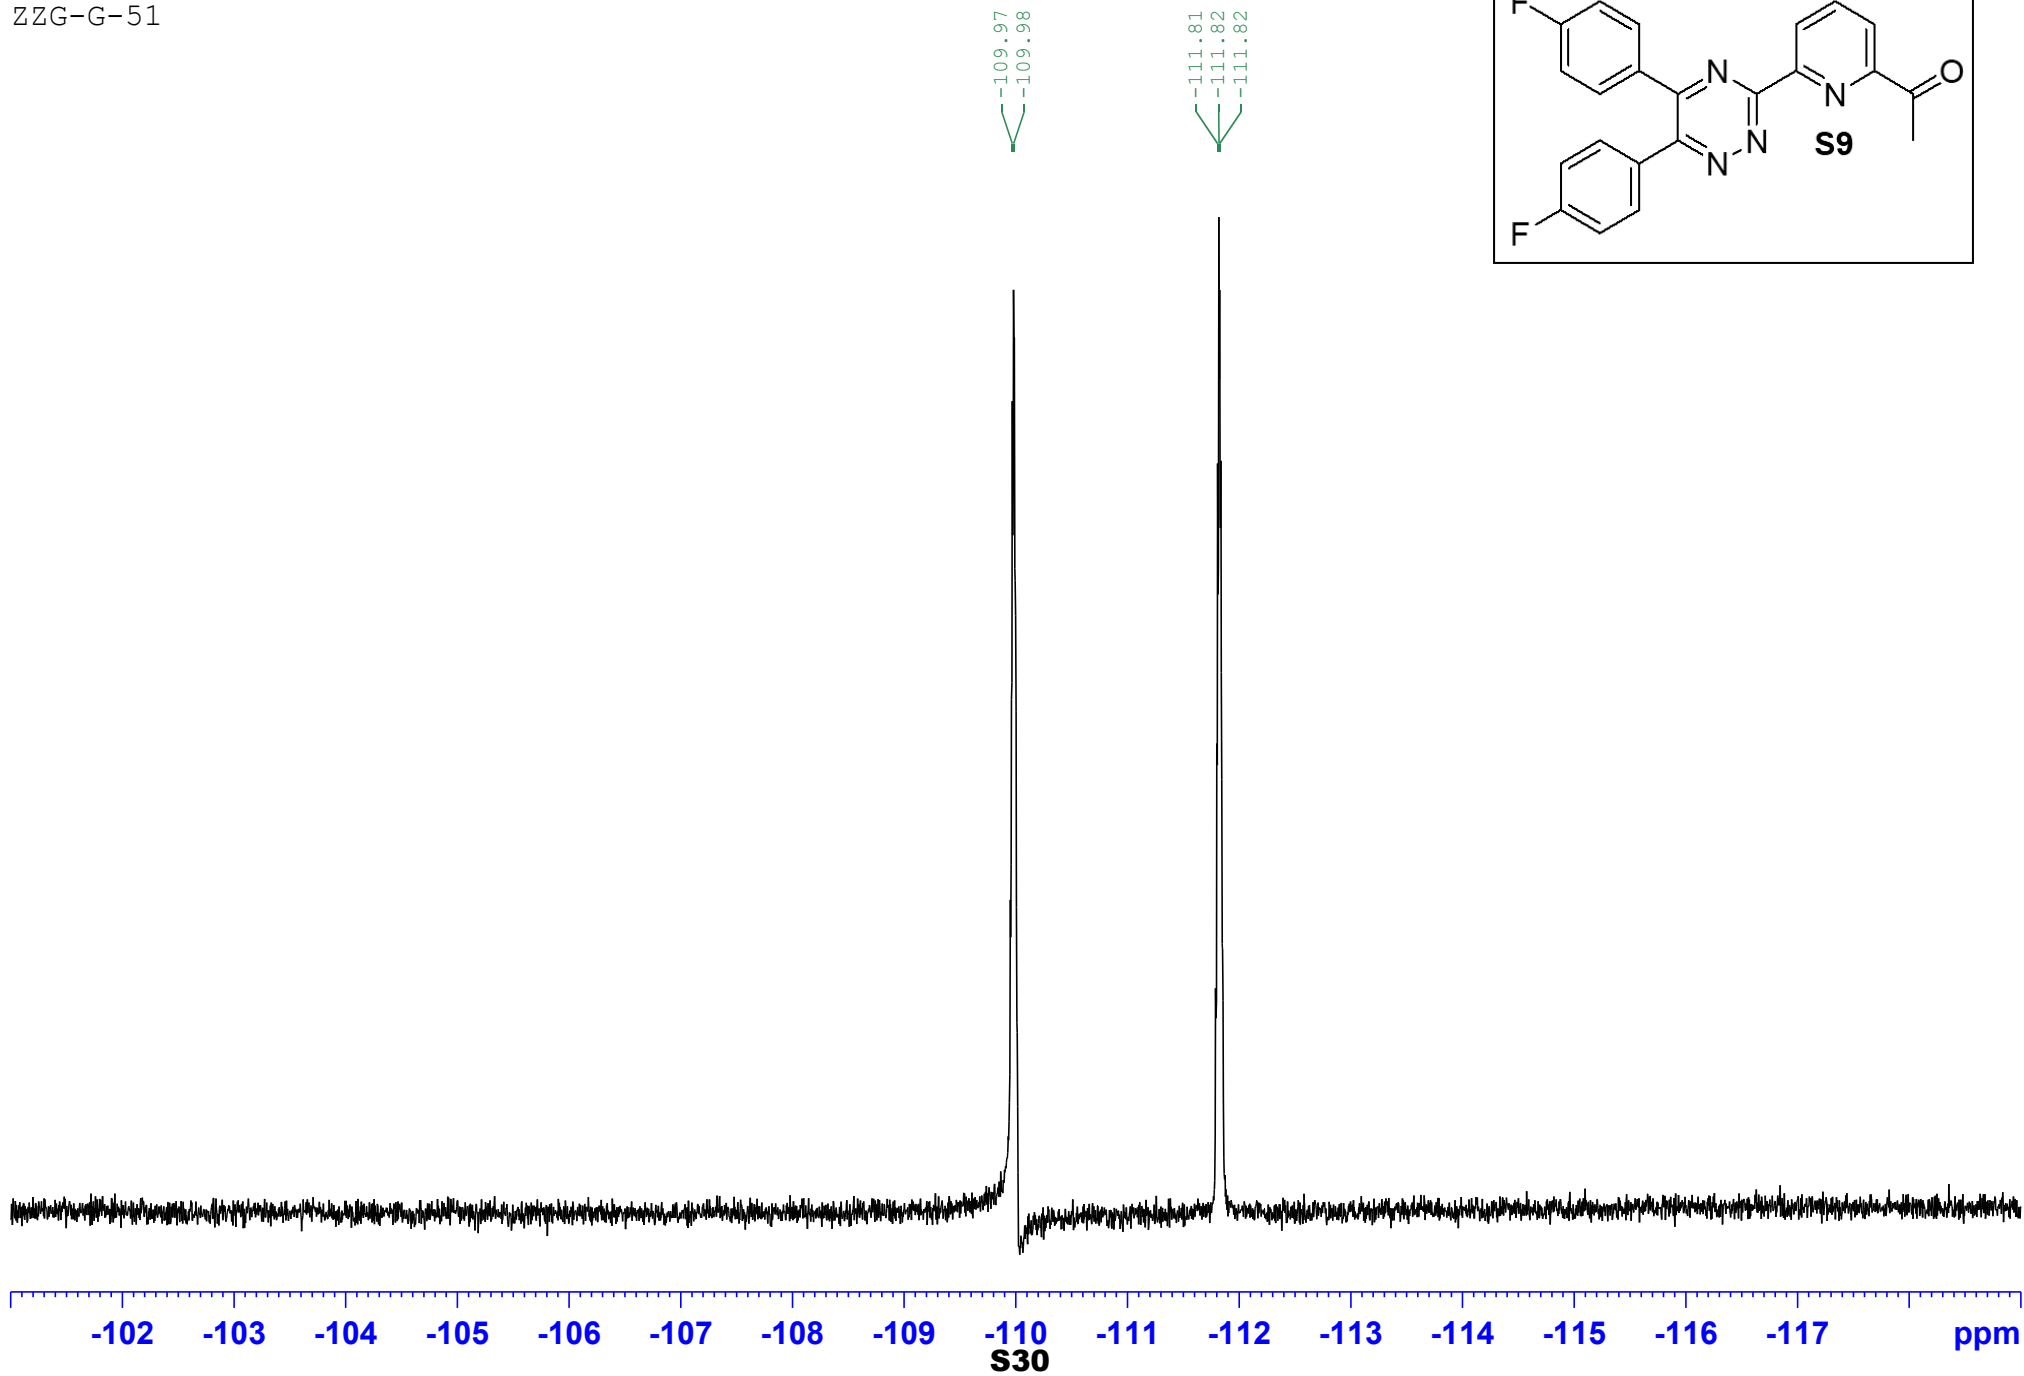

5,6-Bis-(4-cyclopropyl-phenyl)-3-(6-isopropenyl-pyridin-2-yl)-[1,2,4]triazine (S10)  
 ZZG-G-11(2)

8.53  
 8.51  
 7.89  
 7.88  
 7.86  
 7.67  
 7.65  
 7.58  
 7.57  
 7.09  
 7.08  
 7.06  
 7.04

6.10

5.41

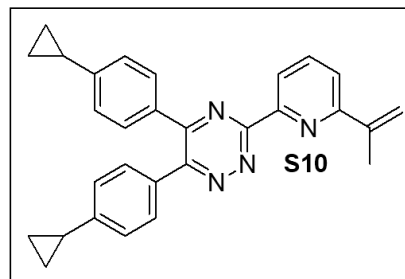

2.35  
 1.96  
 1.94  
 1.93  
 1.92  
 1.91  
 1.90  
 1.89  
 1.88  
 1.04  
 1.02  
 0.77  
 0.76  
 0.75

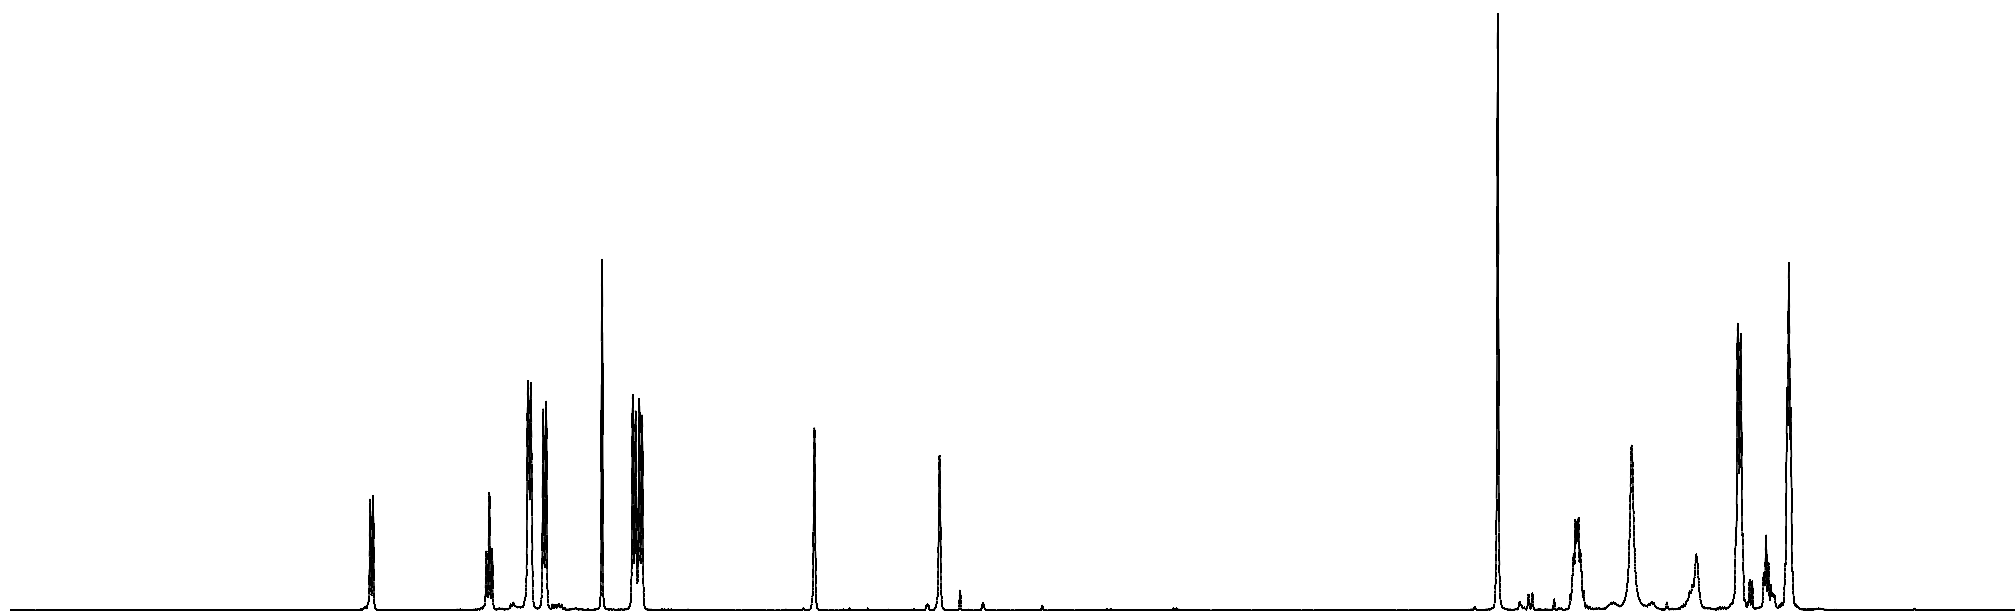

10

9

8

7

6

5

4

3

2

1

ppm

0.97

1.01

2.99

1.98

1.33

3.99

1.00

1.01

S31

3.00

2.07

4.04

3.96

5,6-Bis-(4-cyclopropyl-phenyl)-3-(6-isopropenyl-pyridin-2-yl)-[1,2,4]triazine (S10)  
ZZG-G-11(2)

160.6  
158.9  
155.9  
155.6  
152.3  
147.9  
146.3  
143.2  
137.4  
133.0  
132.7  
130.1  
129.5  
125.9  
125.7  
122.5  
121.3  
116.6

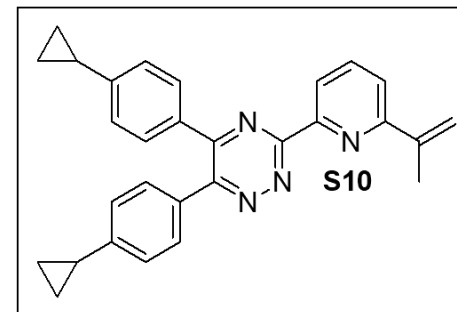

20.6  
15.7  
15.6  
10.3  
10.0

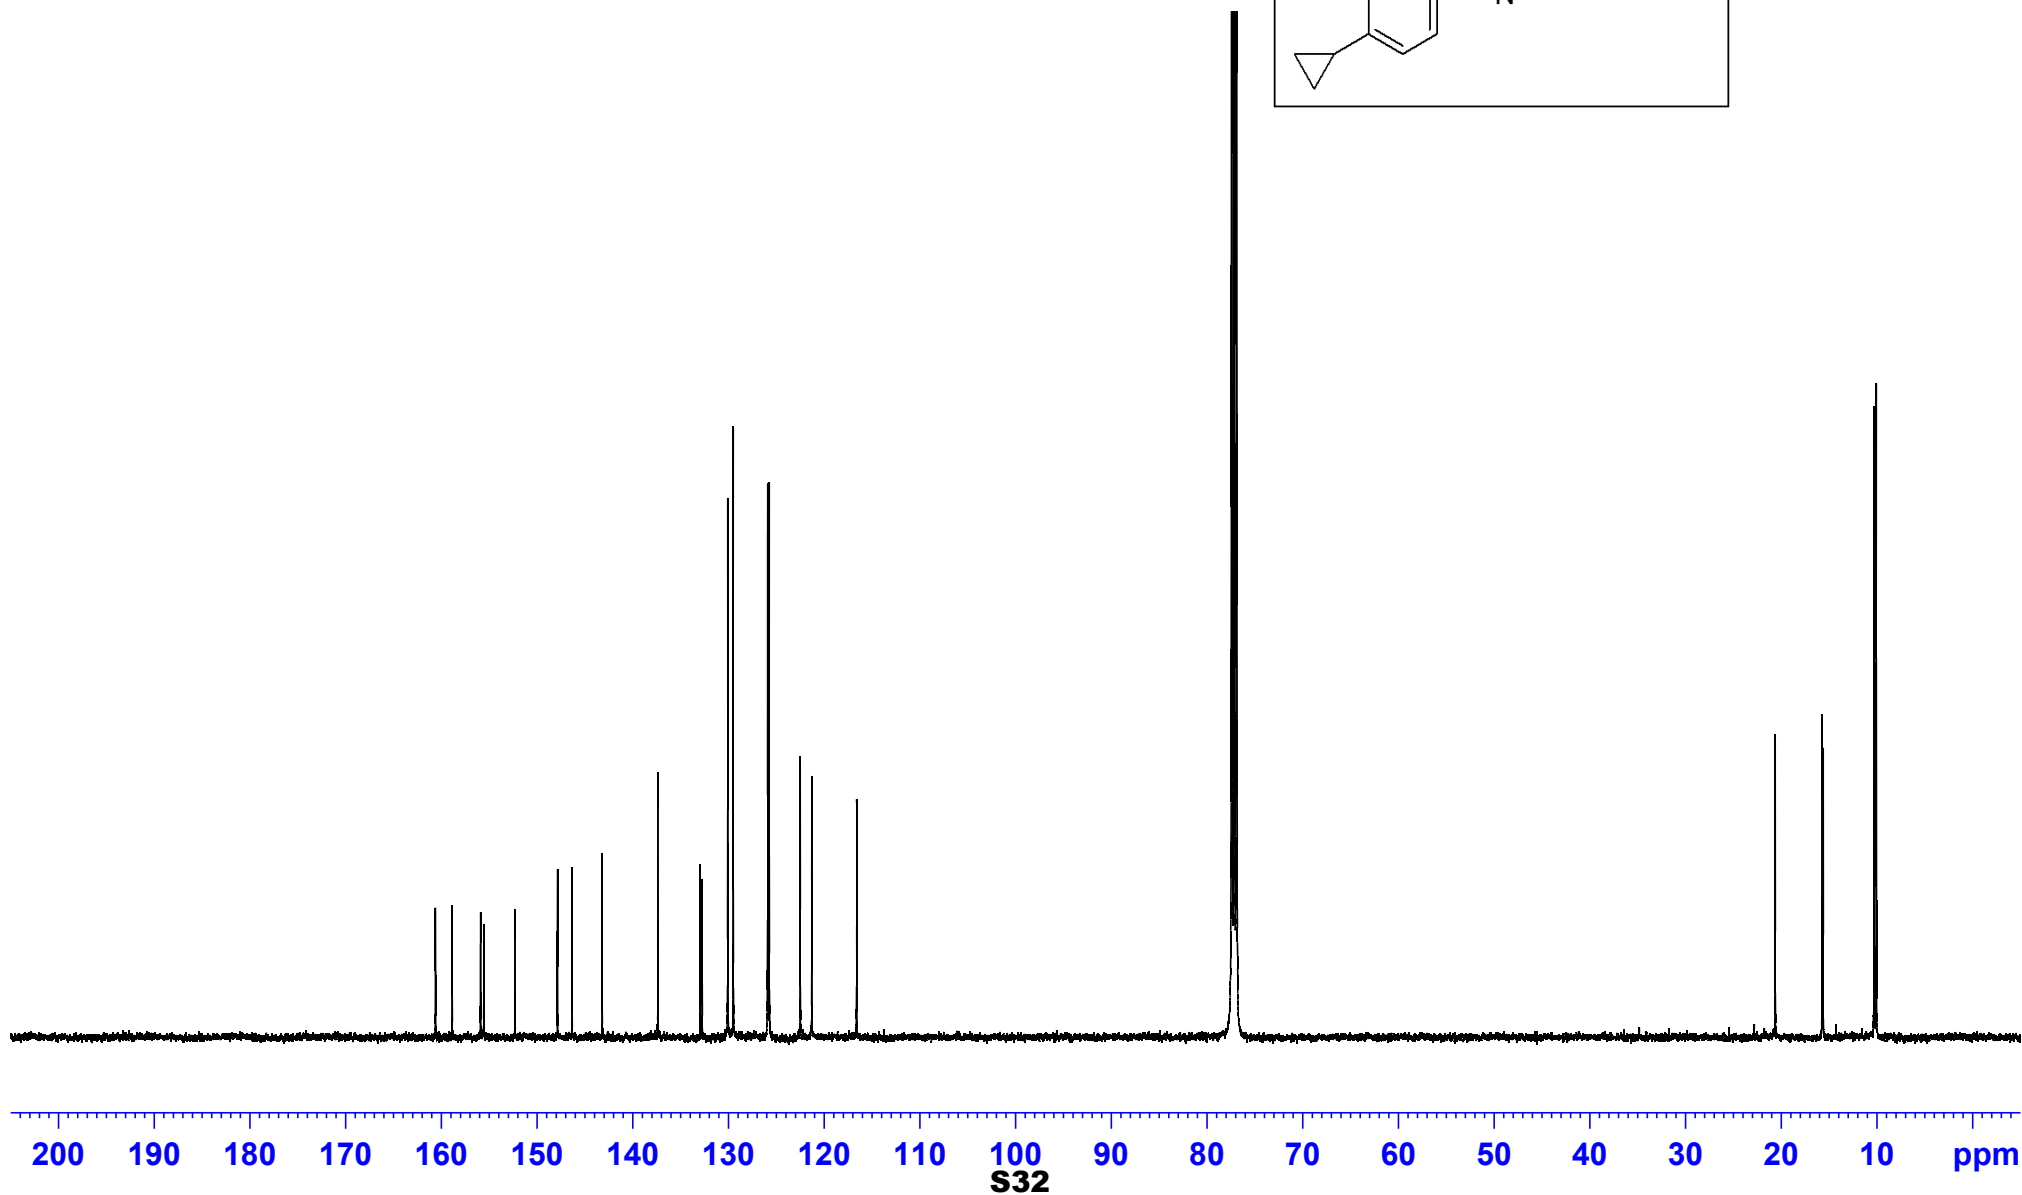



3-(6-Isopropenyl-pyridin-2-yl)-5,6-bis-(3-methoxy-phenyl)-[1,2,4]triazine (S11)  
ZZG-G-61 (3)

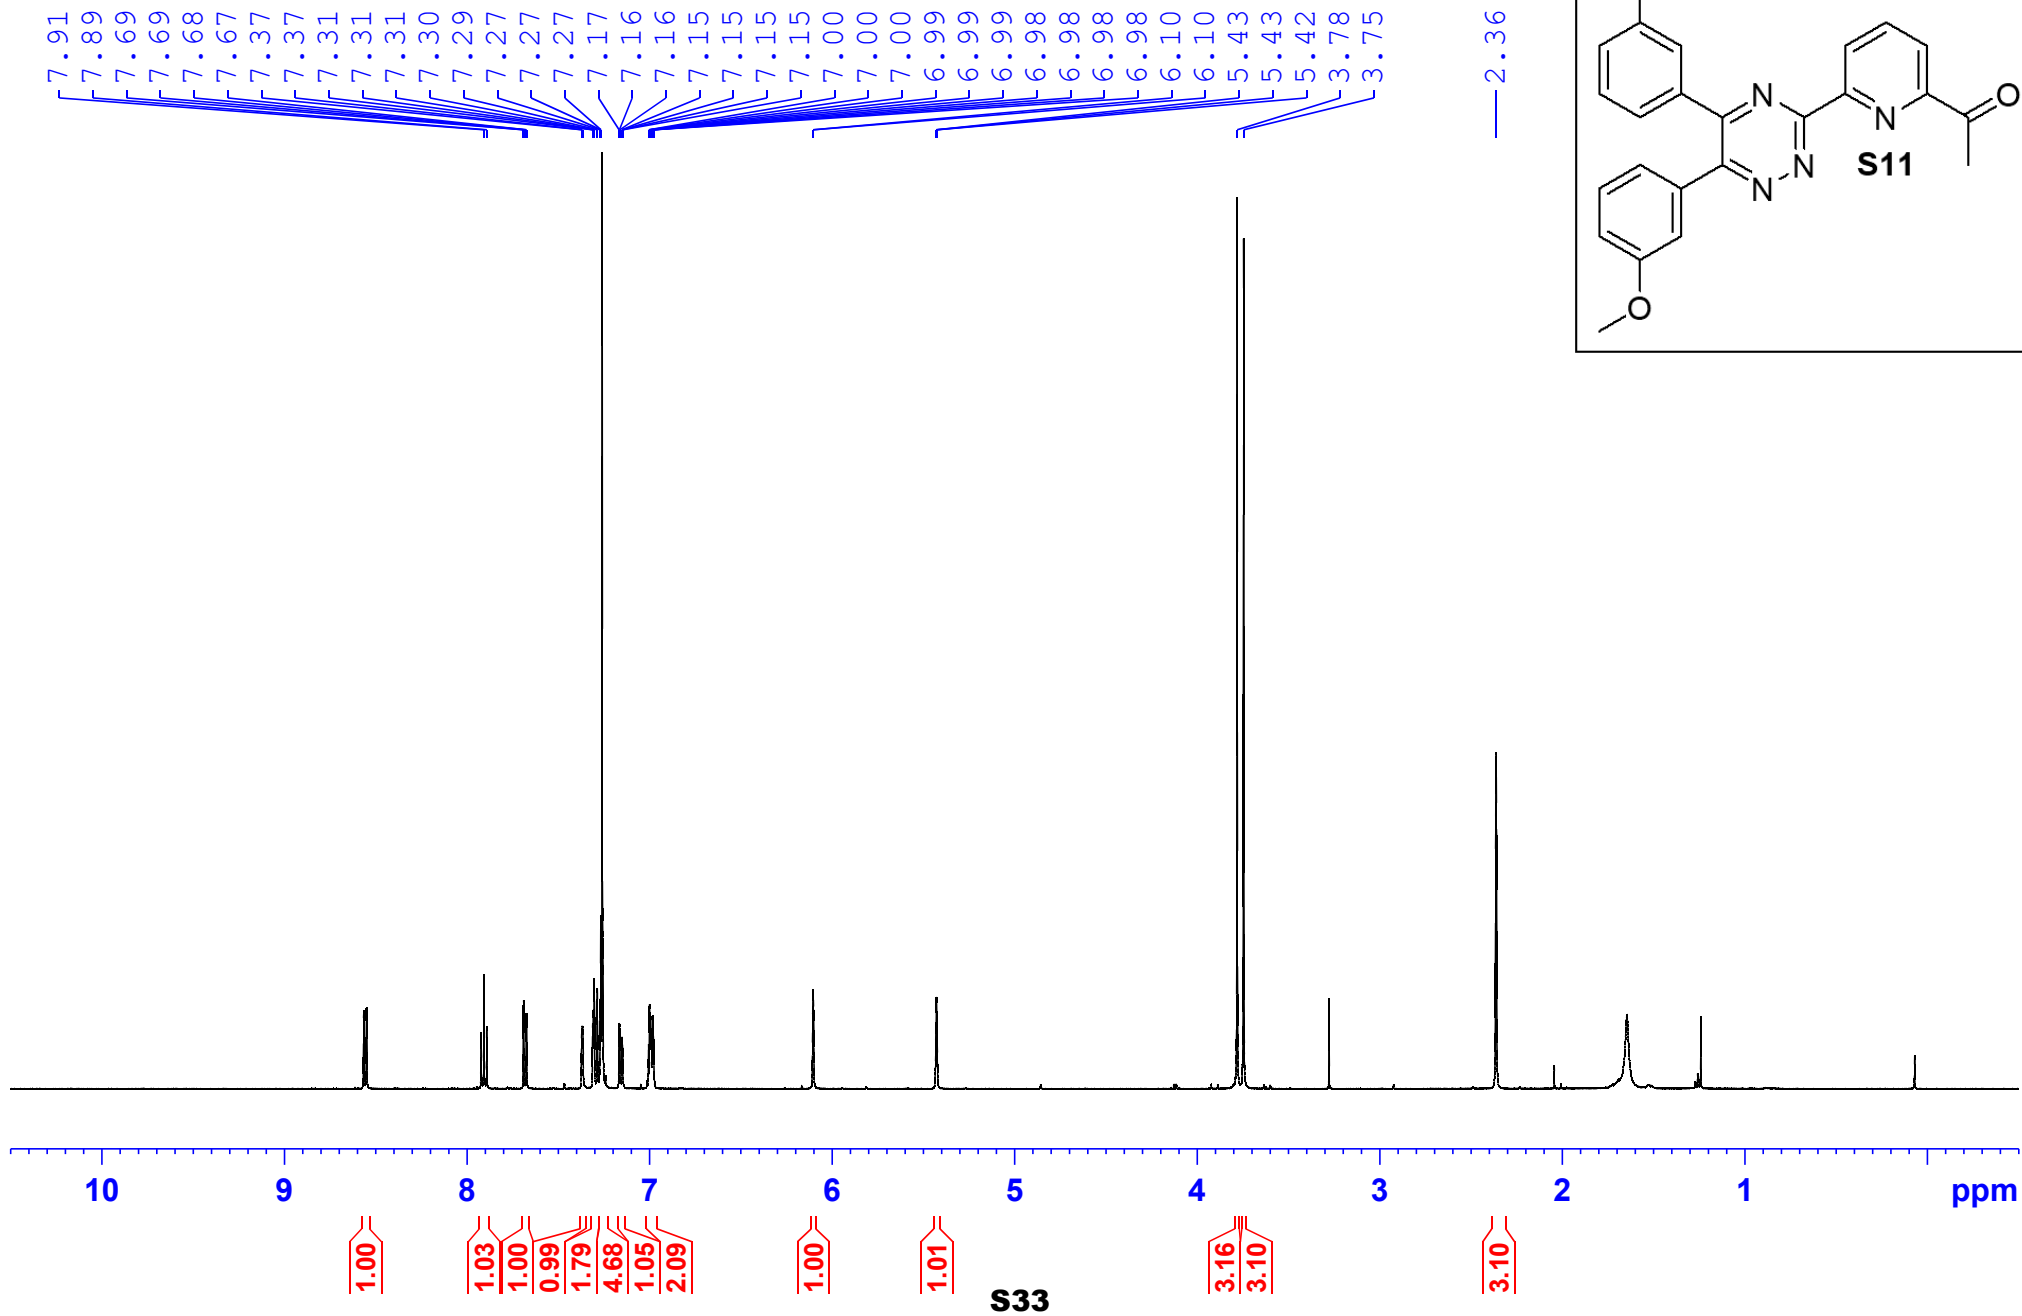

3-(6-Isopropenyl-pyridin-2-yl)-5,6-bis-(3-methoxy-phenyl)-[1,2,4]triazine (S11)  
ZZG-G-61(2)

161.0  
159.9  
159.7  
158.9  
156.1  
155.8  
152.0  
143.1  
137.5  
137.0  
136.8  
129.8  
129.7  
122.6  
122.2  
121.5  
117.5  
116.7  
116.3  
114.7  
114.4

55.5  
55.4

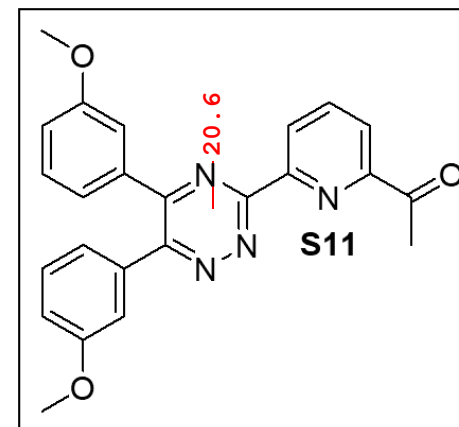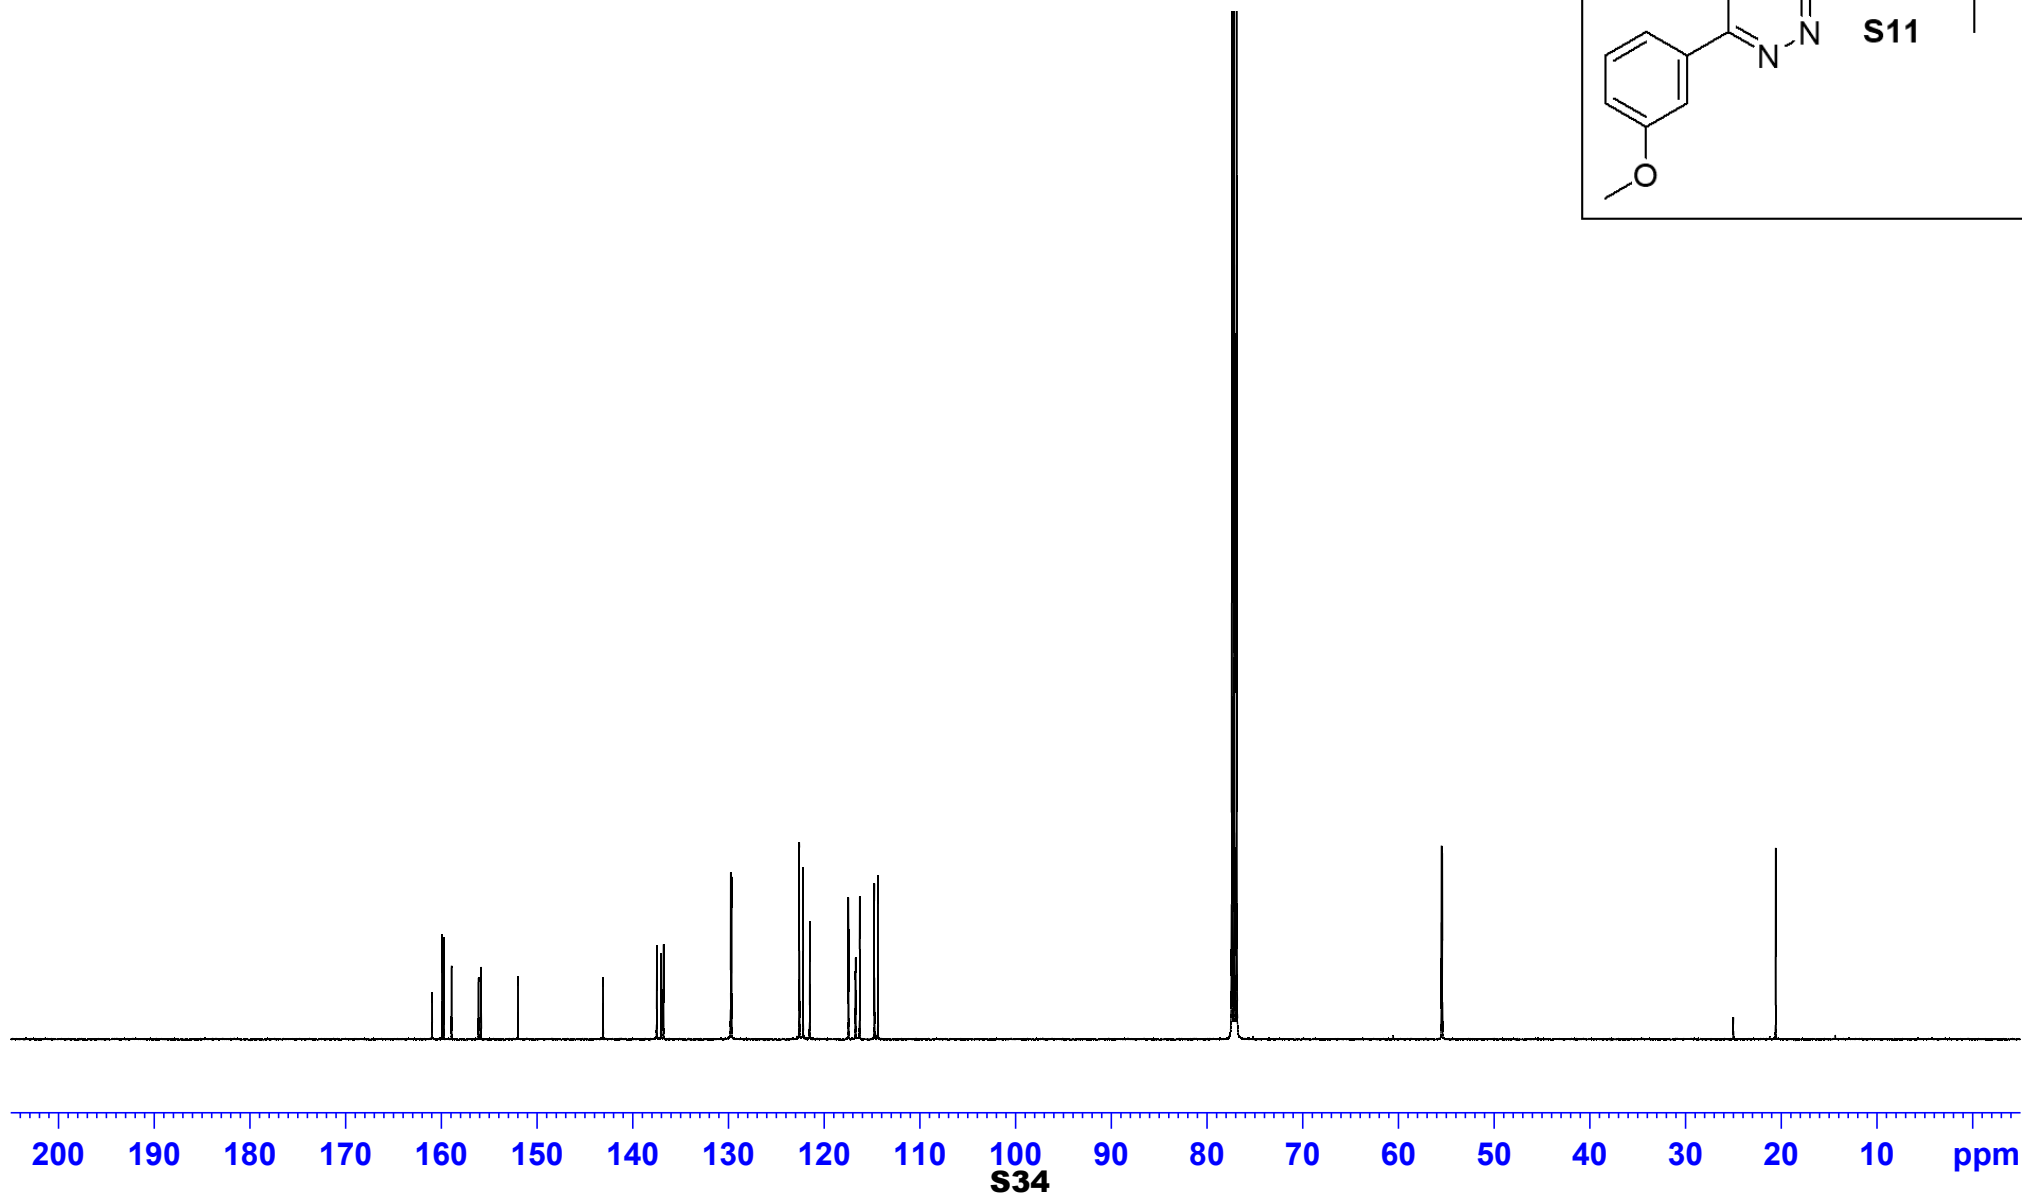

2-Isopropenyl-6-methoxypyridine (S13)  
CCP-A-71 (6)

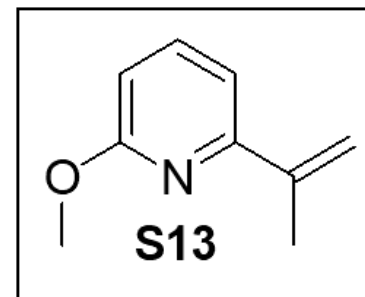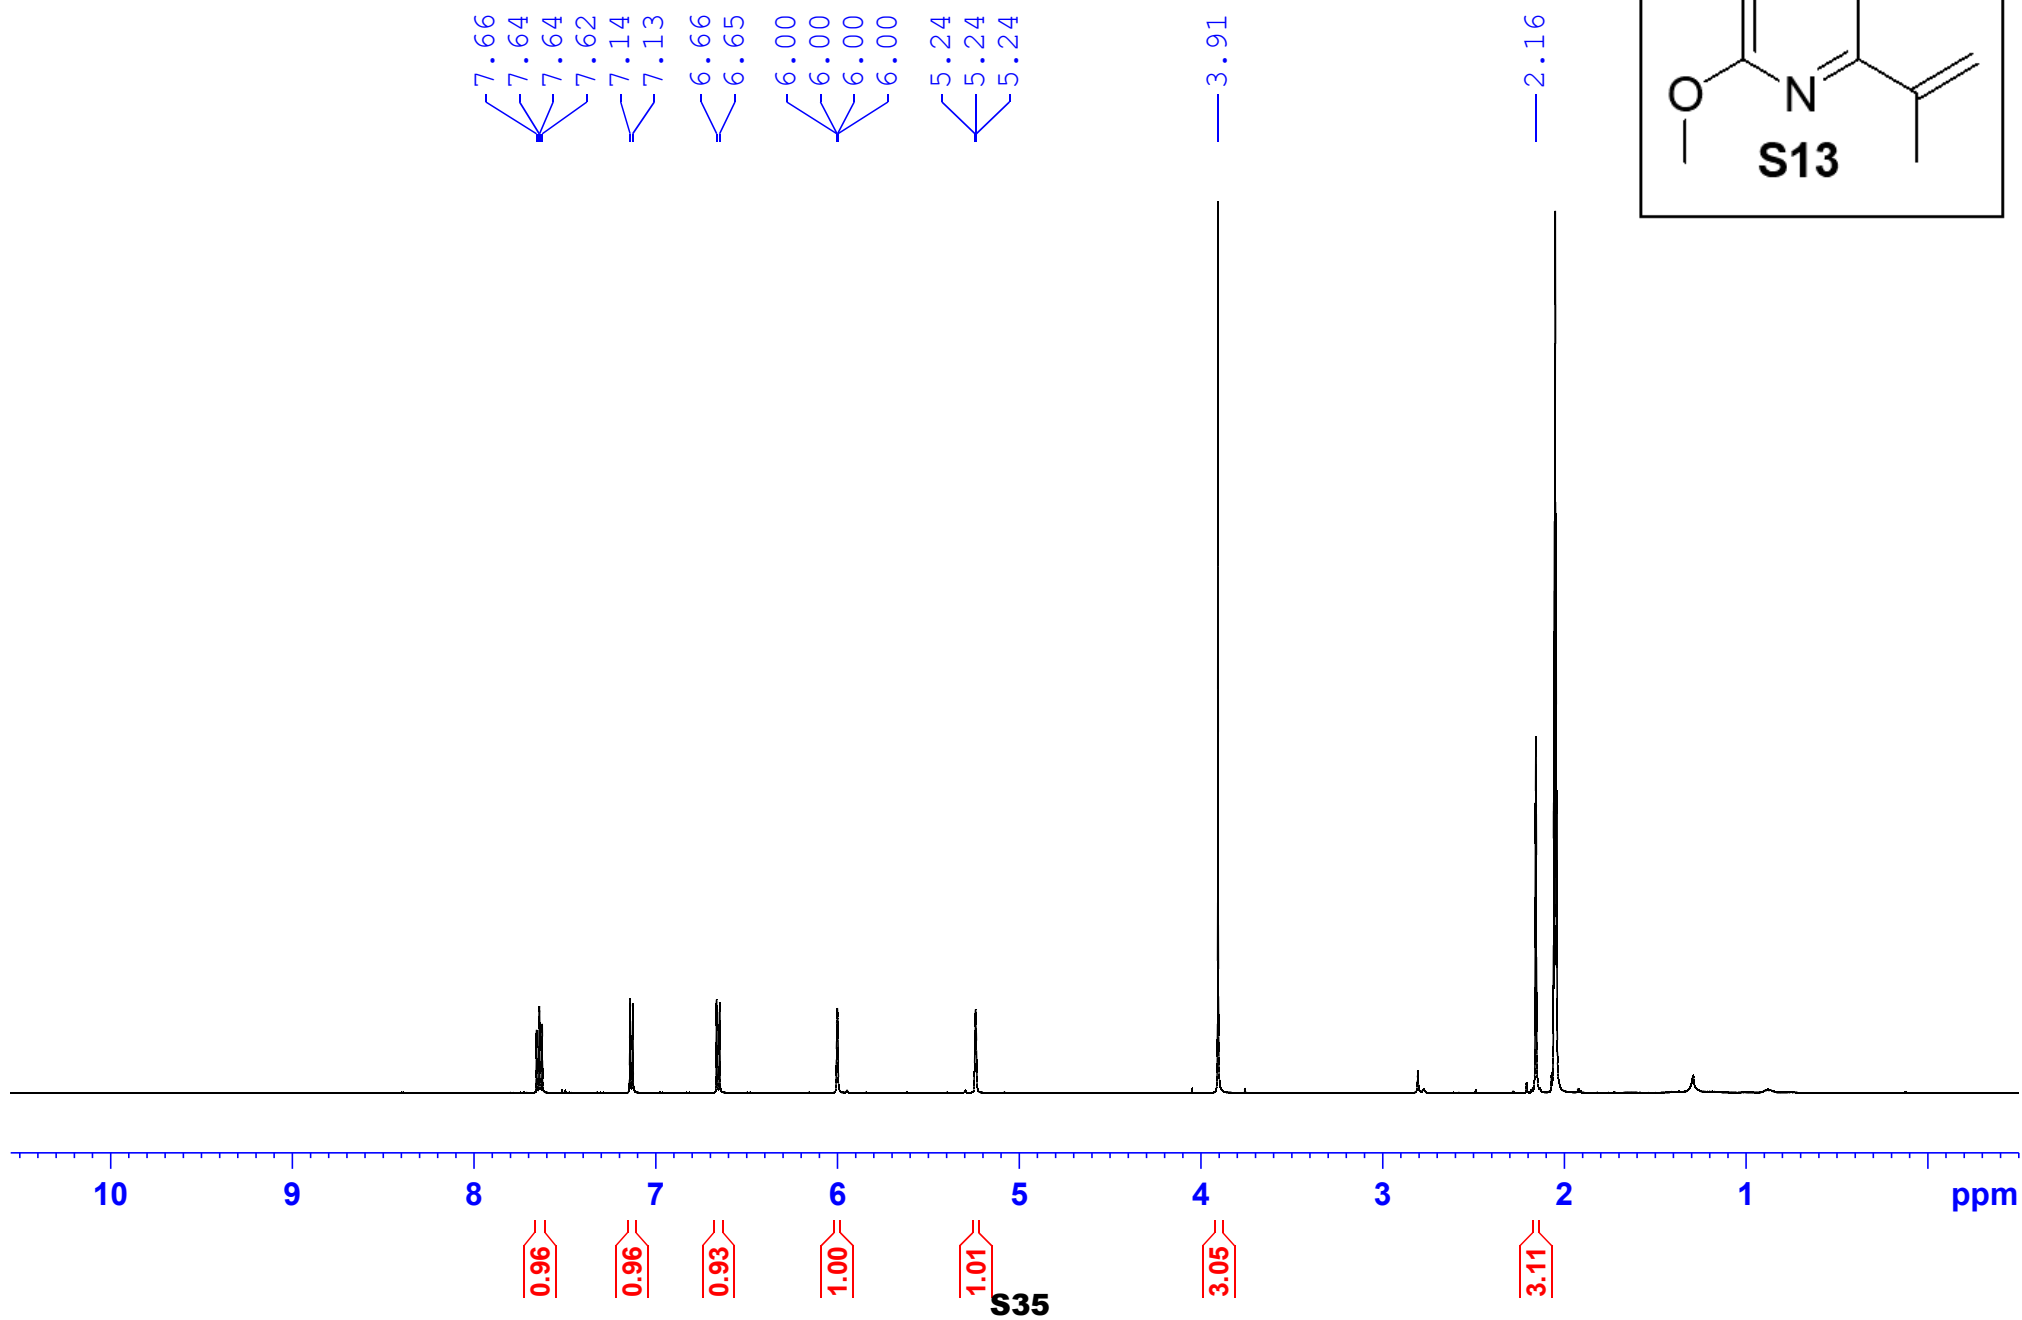

S35

2-Isopropenyl-6-methoxypyridine (S13)  
CCP-A-71(5)

— 163.1

— 155.5

— 142.6

— 139.0

— 115.5

— 112.5

— 109.5

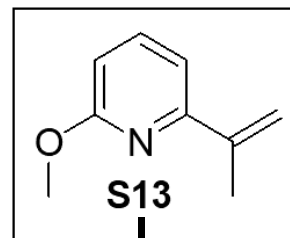

— 53.2

— 20.4

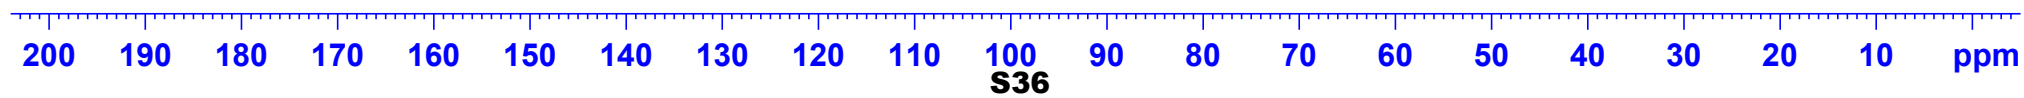

2-Isopropenyl-6-phenyl-pyridine (S15)  
CCP-A-159 (2)

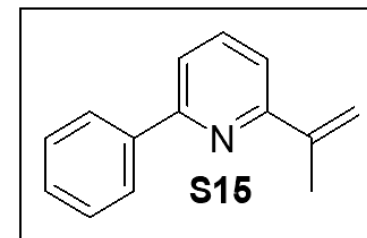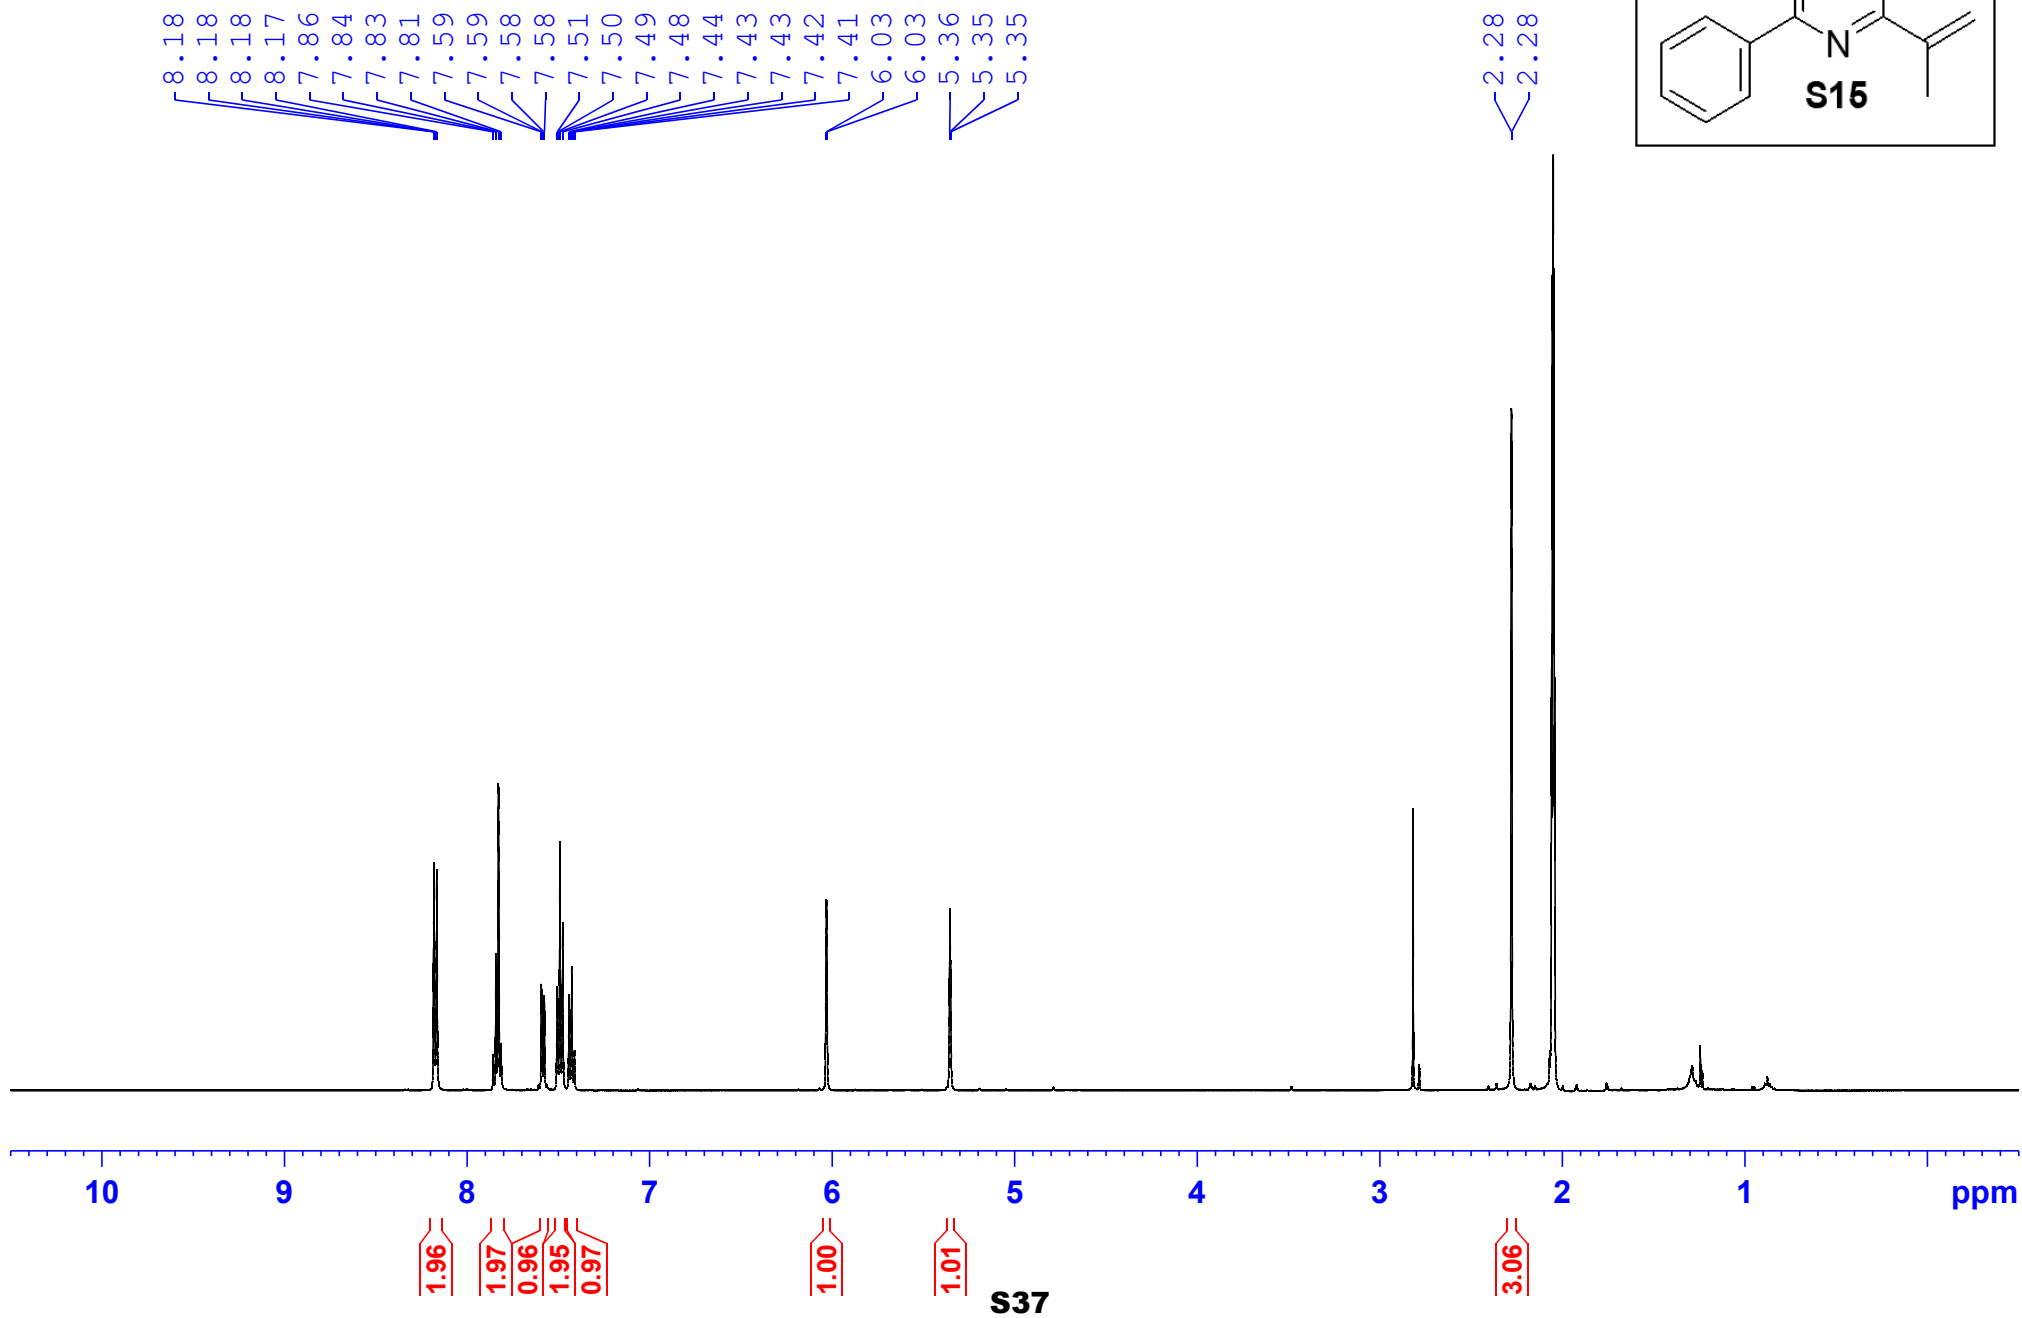

S37

2-Isopropenyl-6-phenyl-pyridine (S15)  
CCP-A-159(3)

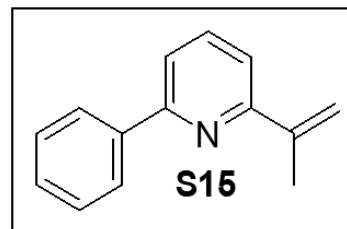

158.4  
156.4  
144.5  
140.3  
138.2  
129.7  
129.5  
127.5  
119.3  
118.9  
115.7

20.6

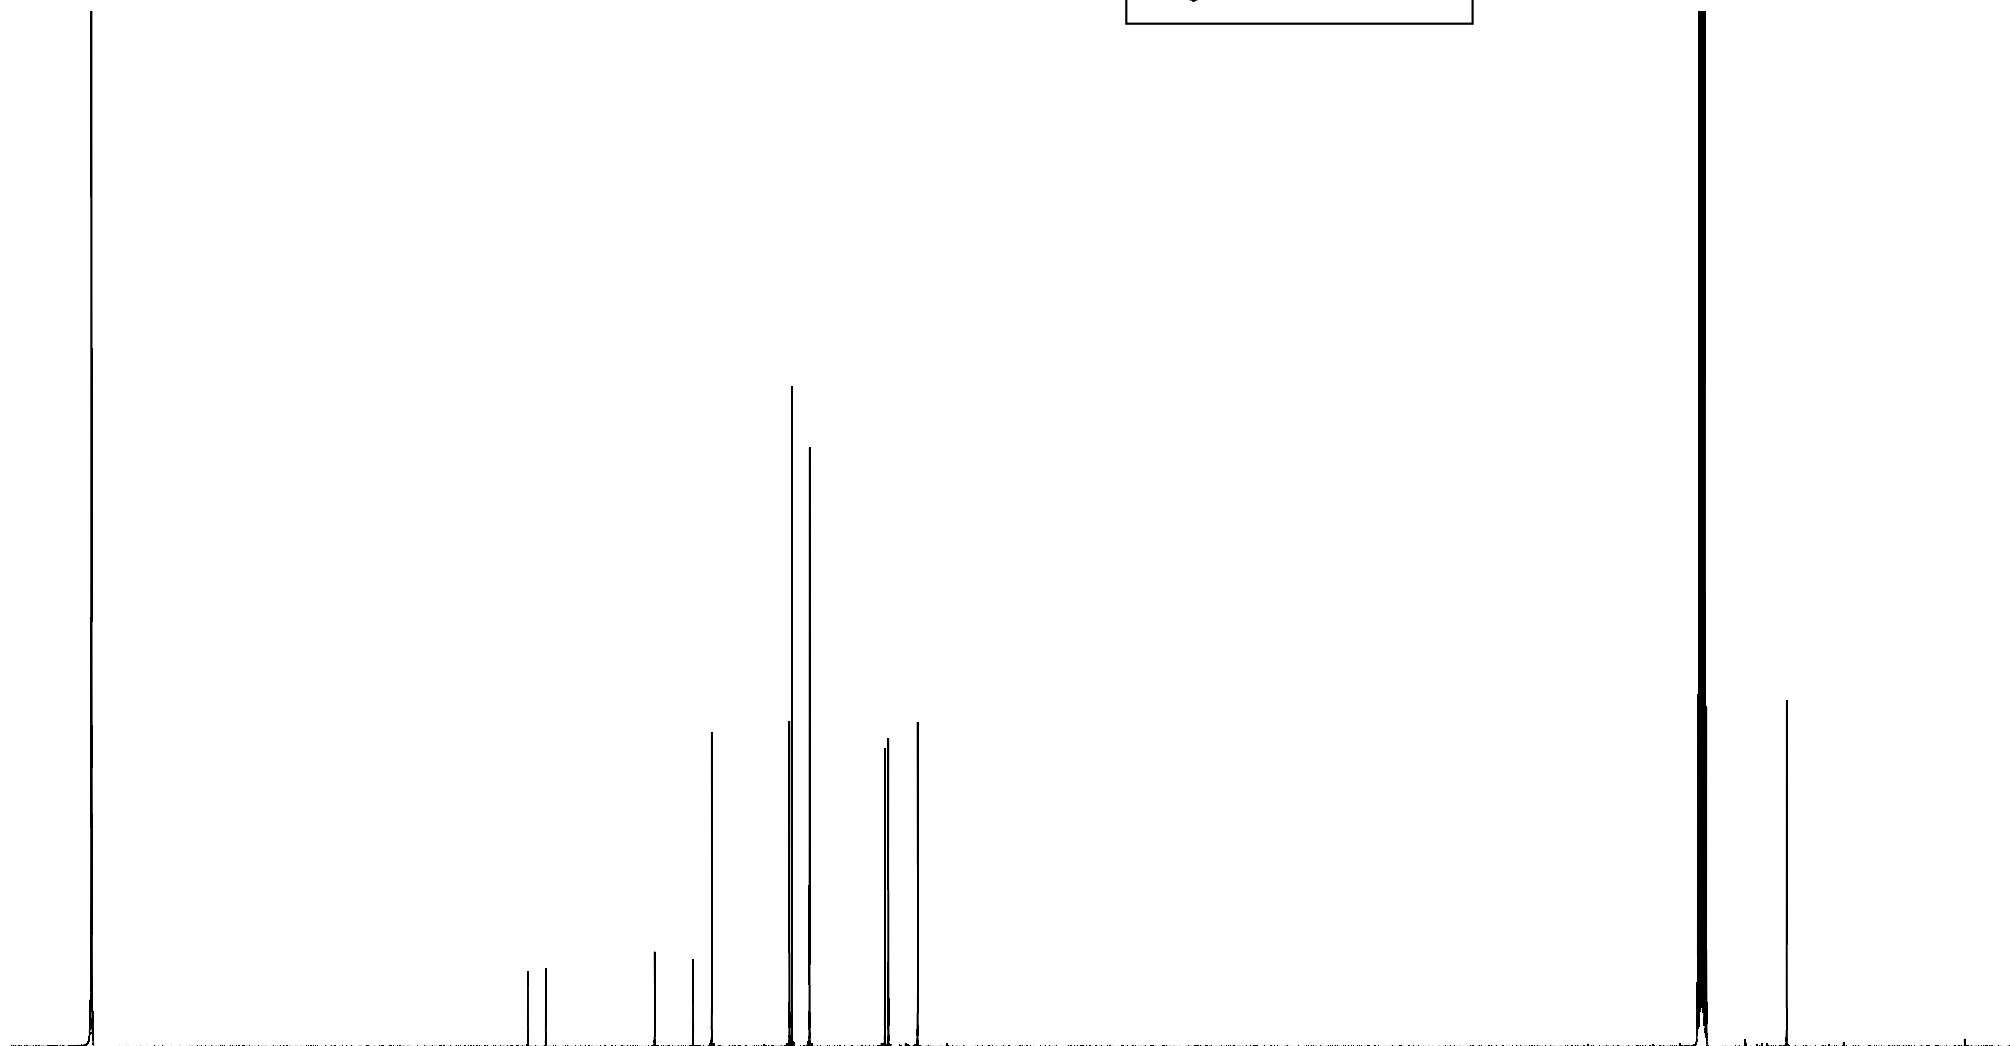

210 200 190 180 170 160 150 140 130 120 110 100 90 80 70 60 50 40 30 20 10 ppm

S38

2-Isopropenyl-4-methyl-pyridine (S16)  
CCP-A-81 (10)

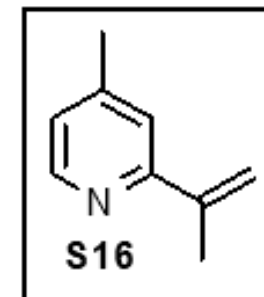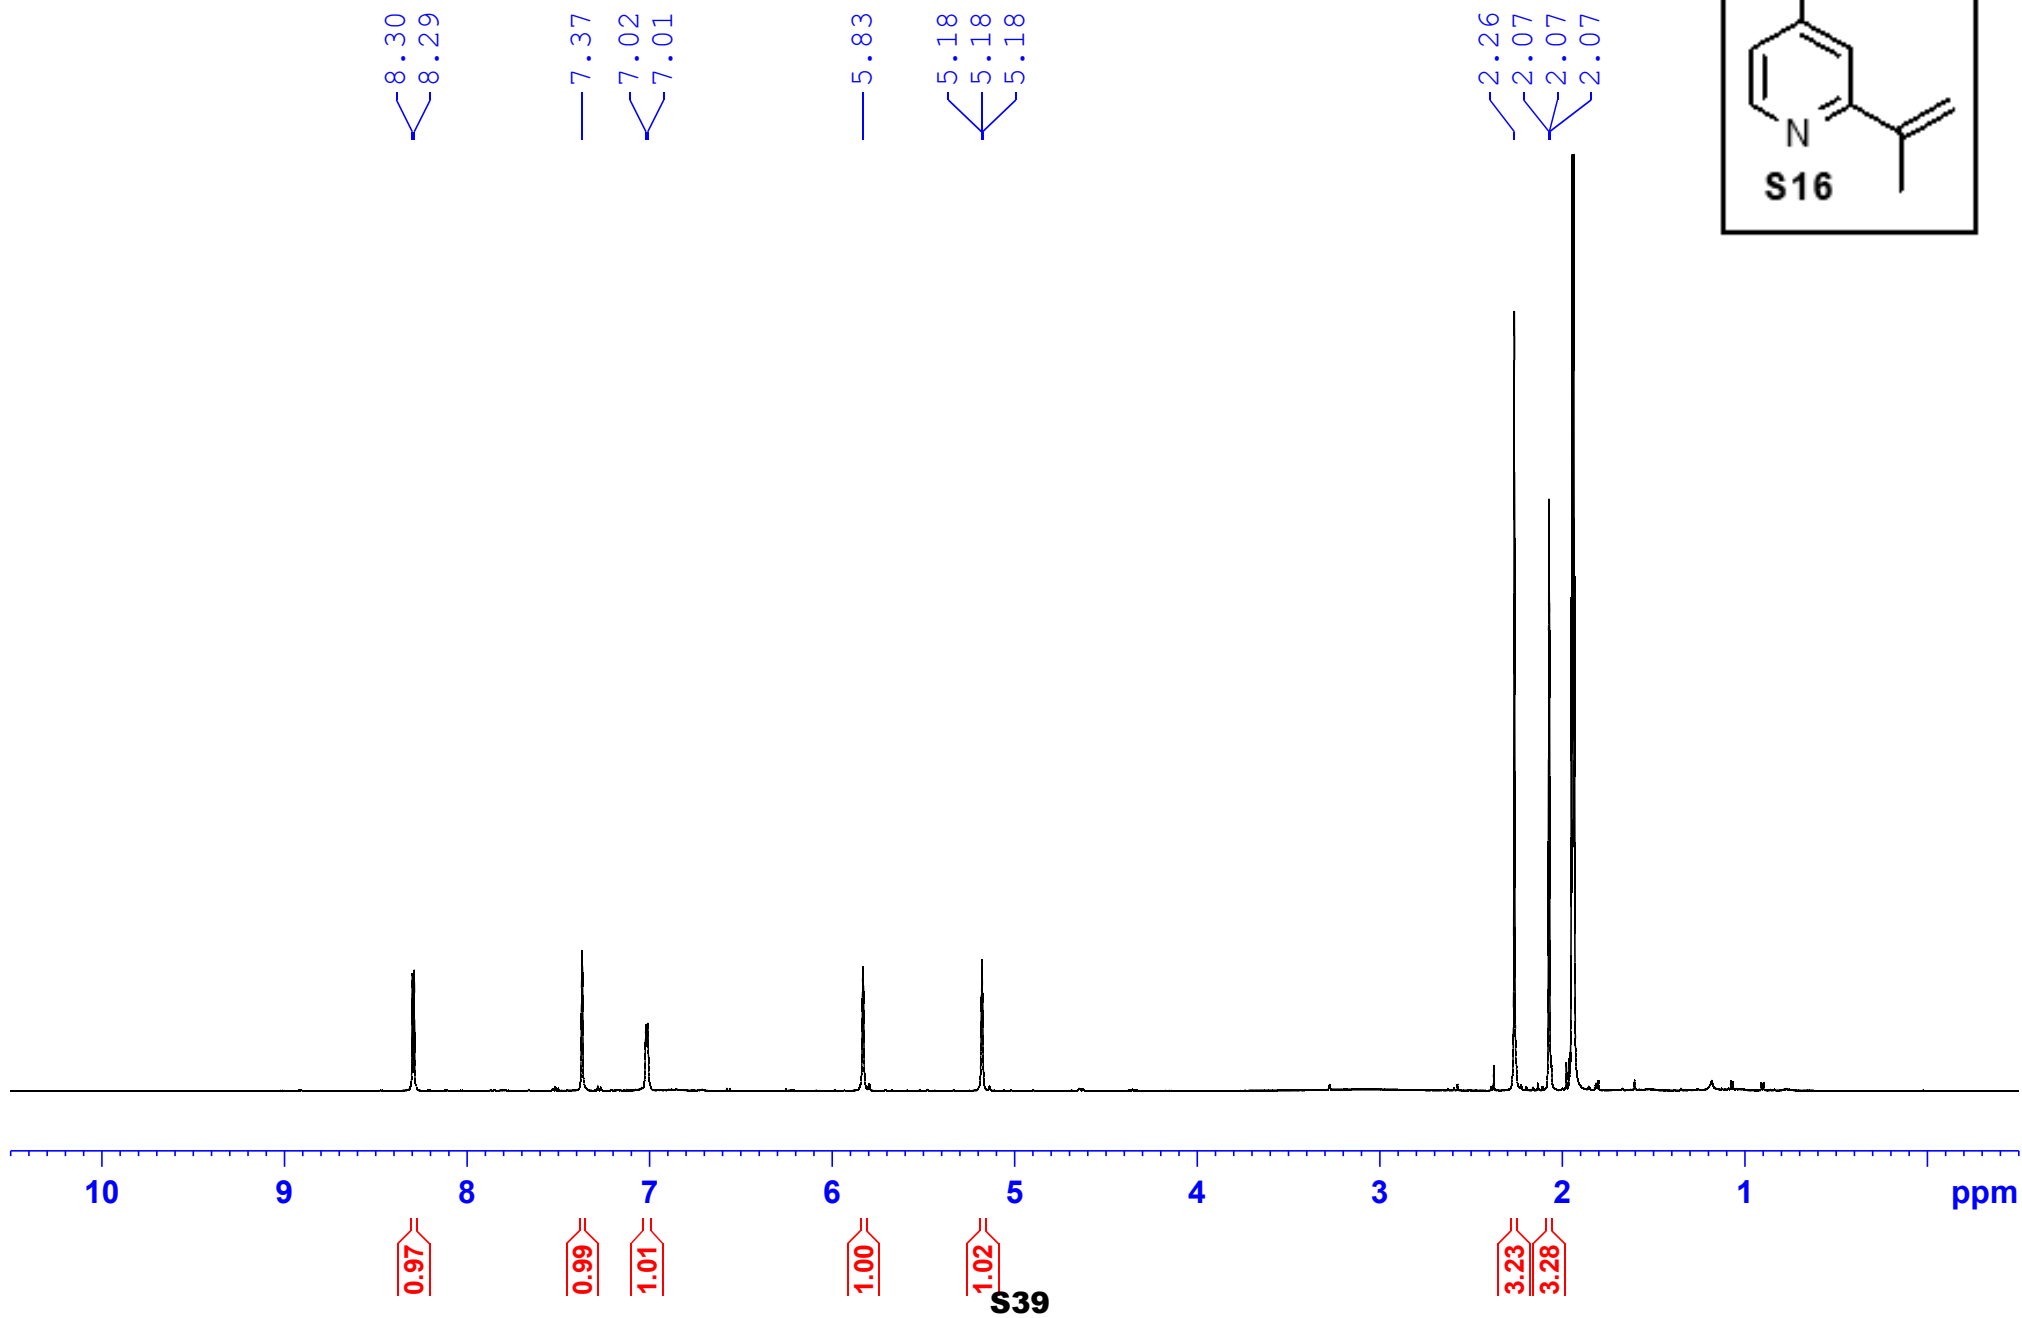

2-Isopropenyl-4-methyl-pyridine (S16)  
CCP-A-81(10)

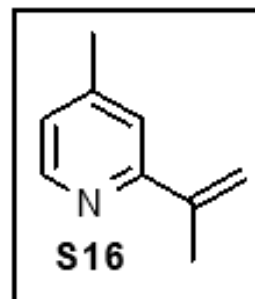

158.1  
149.0  
148.9  
143.8  
124.1  
121.5  
116.0

21.0  
20.6

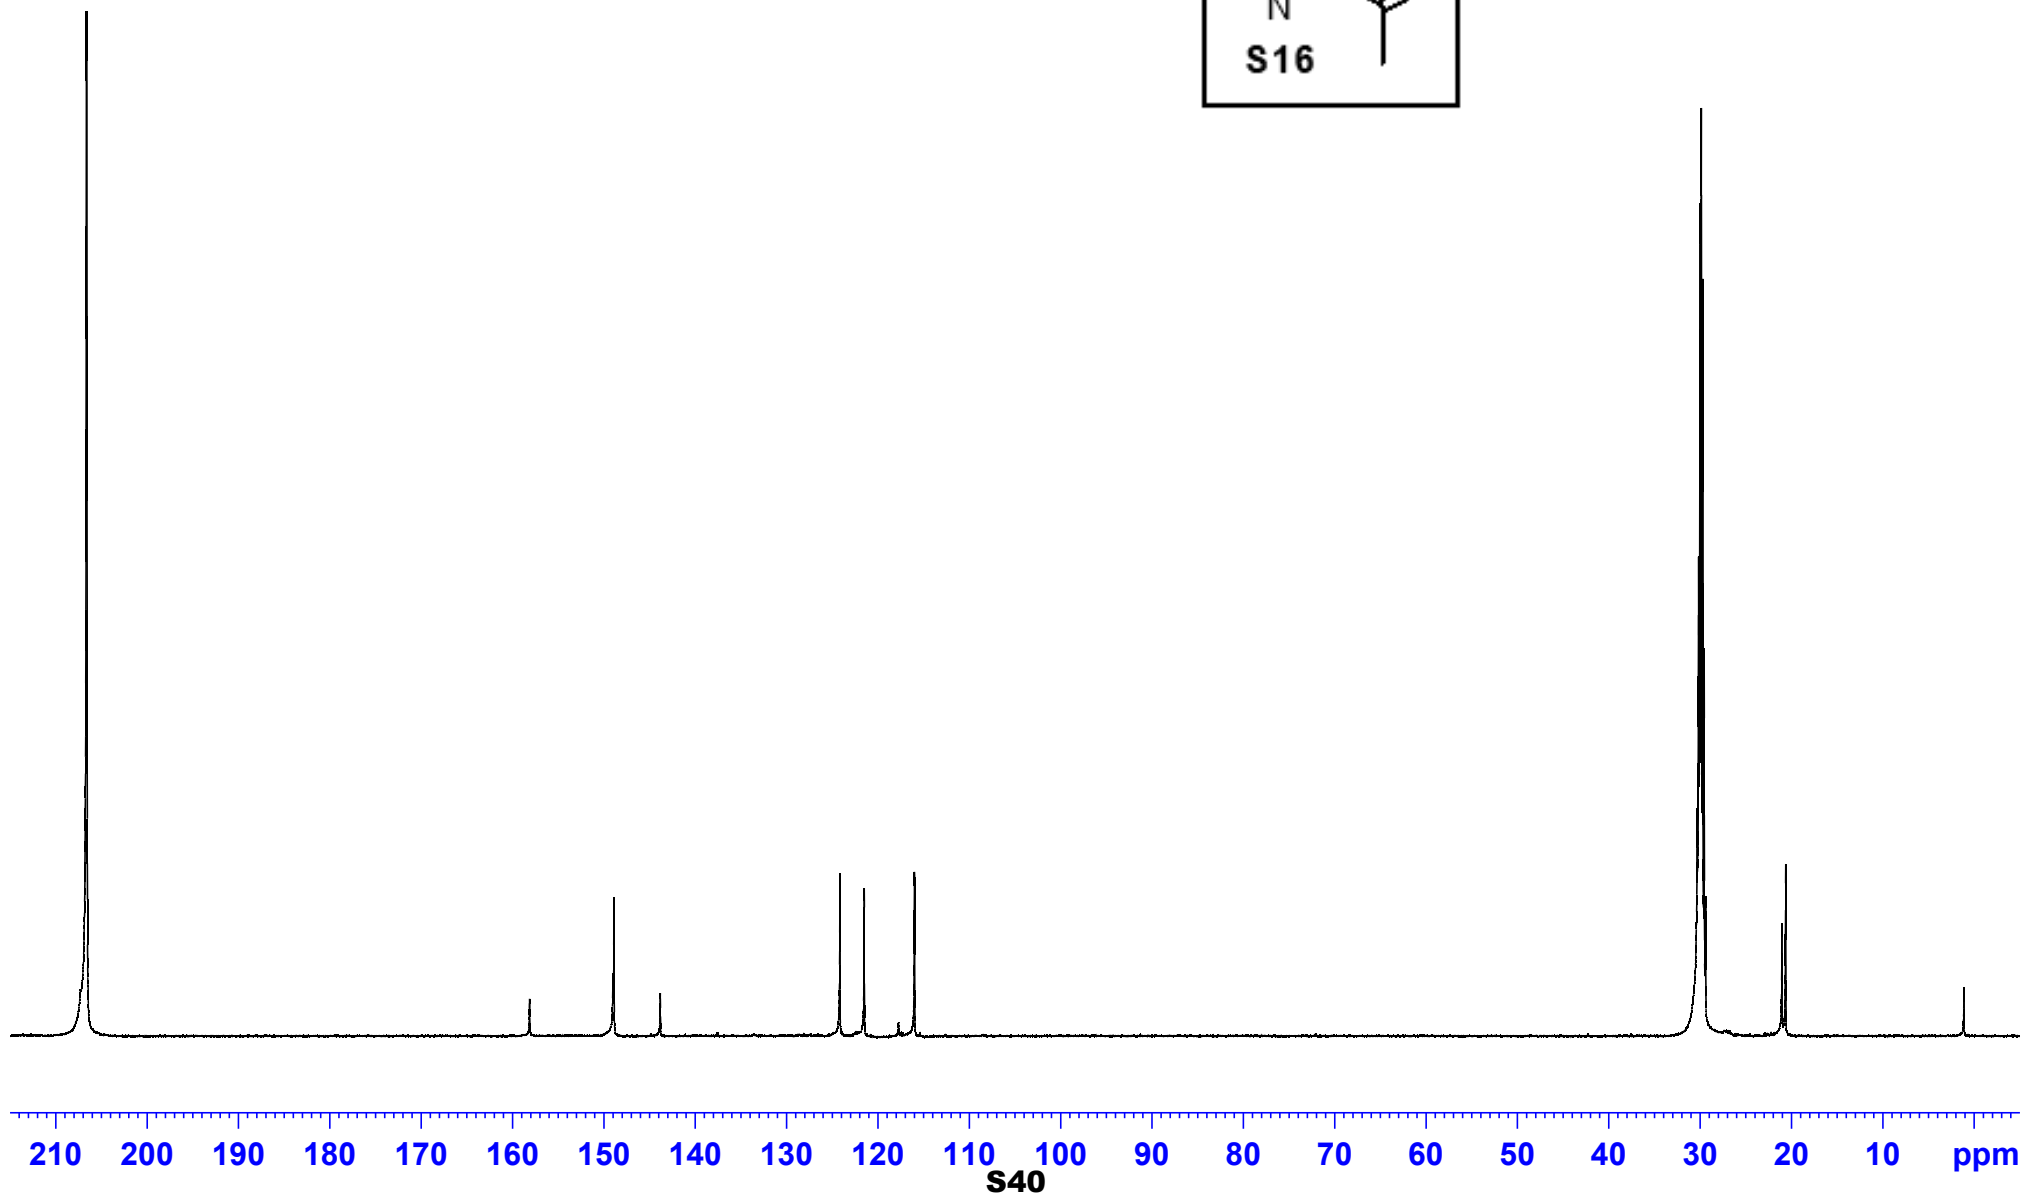



4-Isopropenyl-2-methyl-pyridine (S17)  
CCP-A-83 (7)

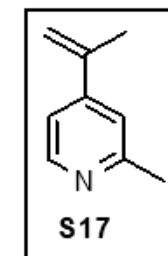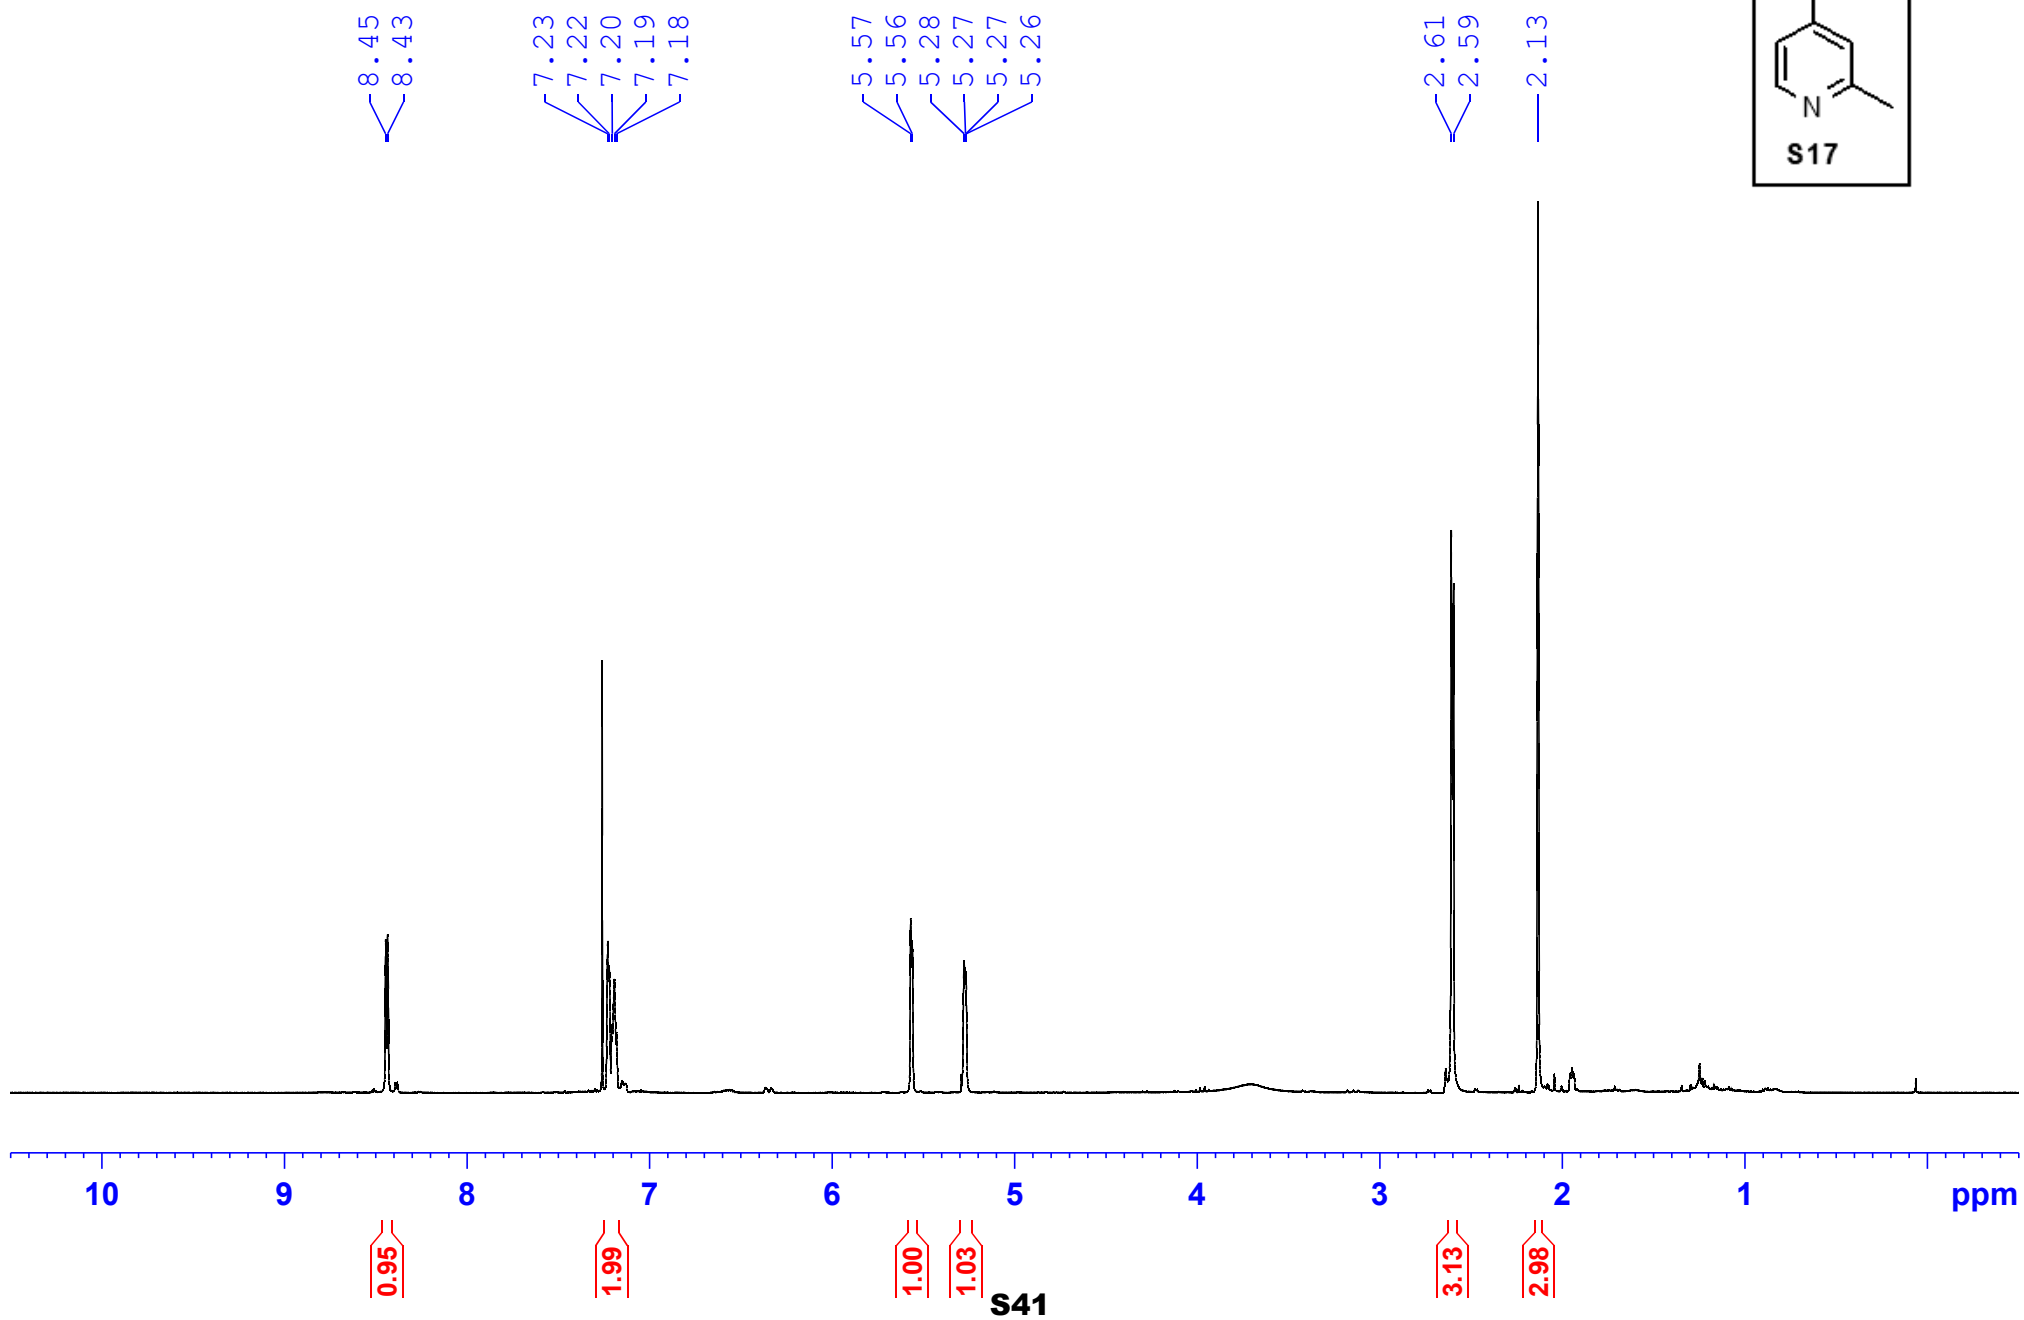

4-Isopropenyl-2-methyl-pyridine (S17)  
CCP-A-83(7)

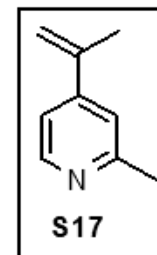

158.0  
157.9  
149.7  
149.6  
148.2  
148.1  
141.0  
141.0

120.1  
120.0  
117.7  
117.6  
116.4  
116.3

23.9  
20.9

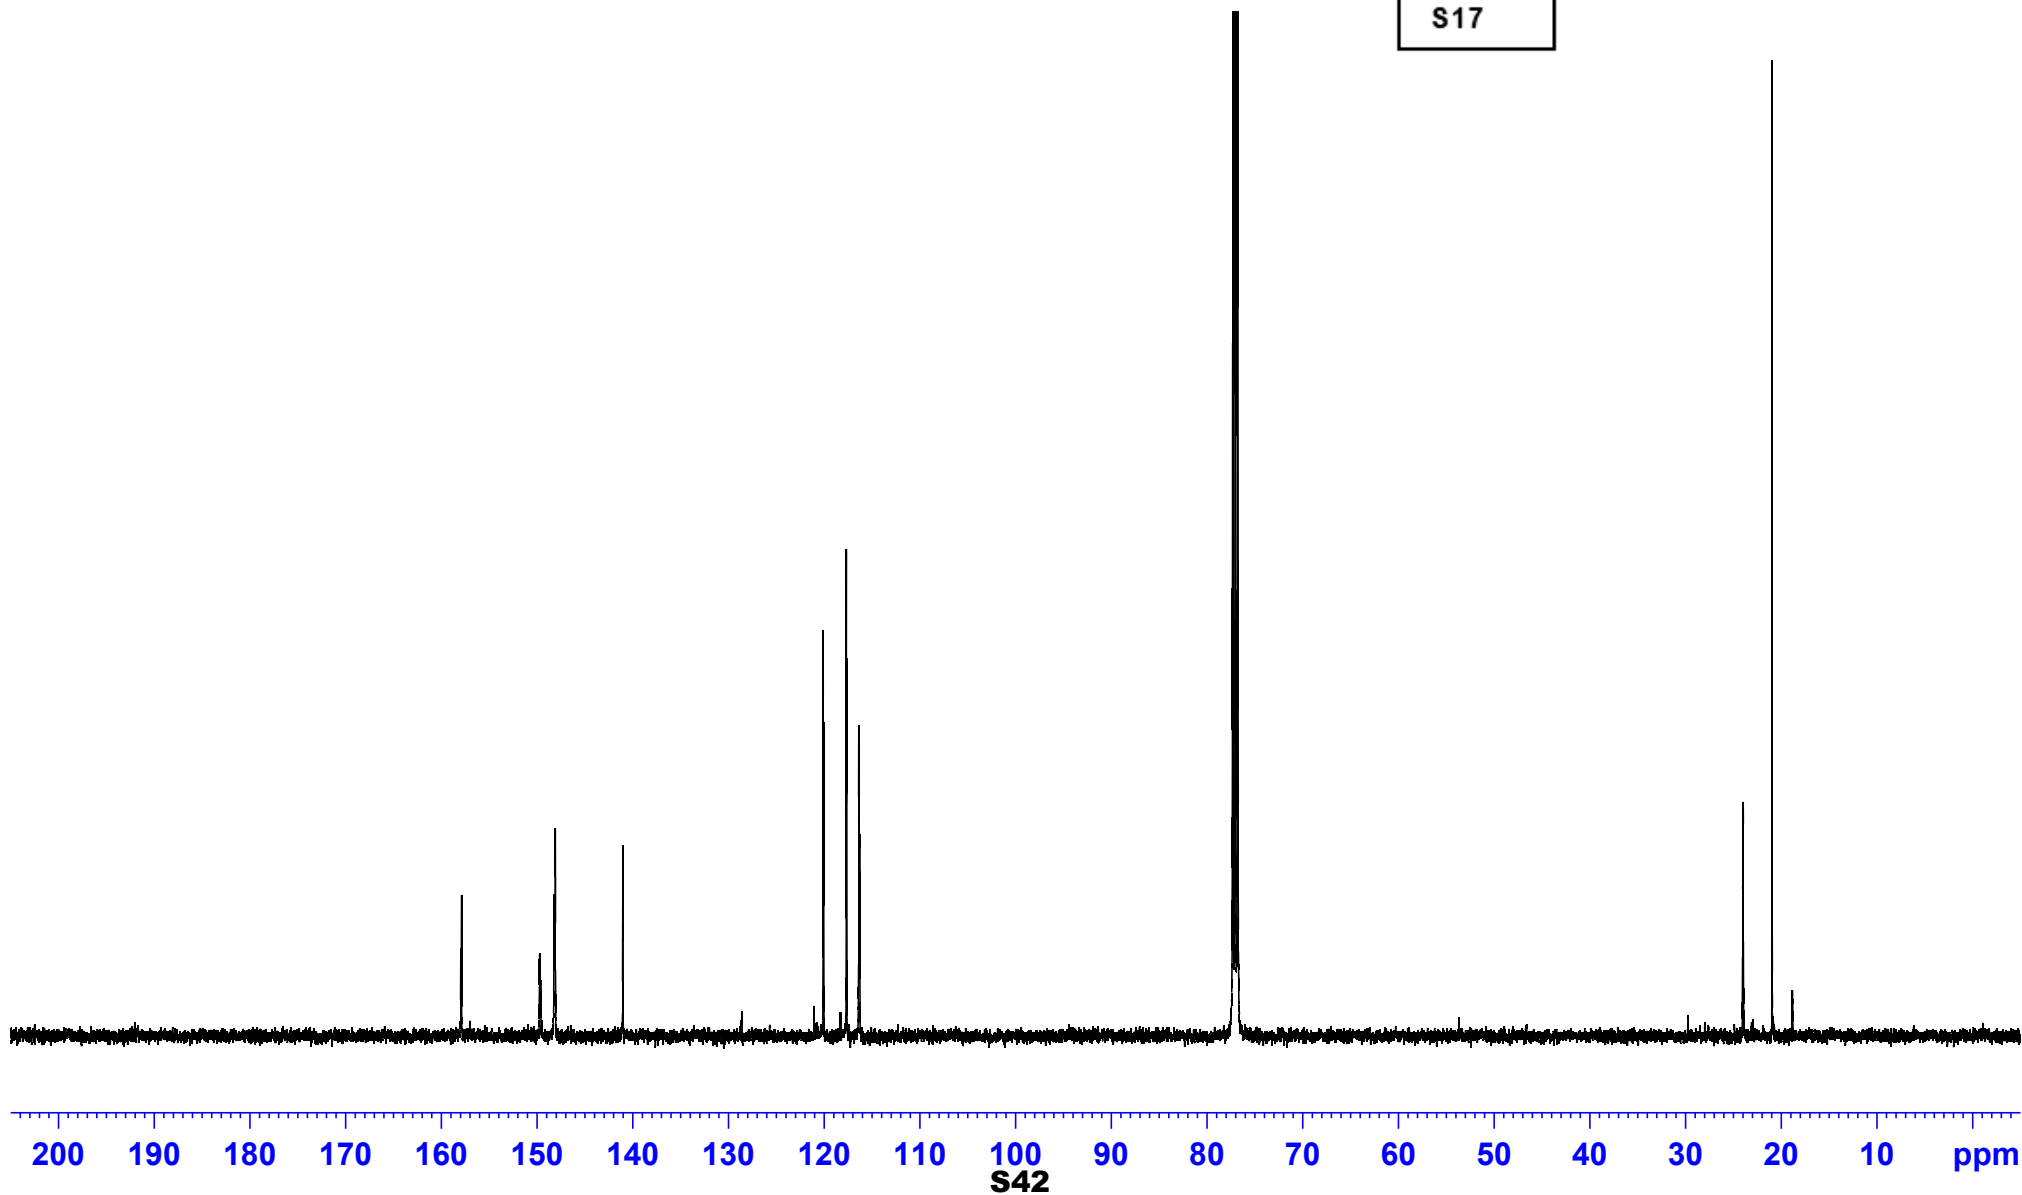

3-Isopropenyl-2-methyl-pyridine (S18)  
CCP-A-163 (1)

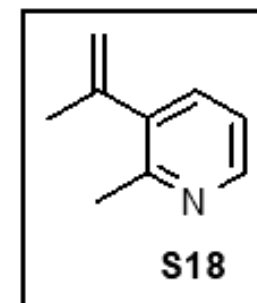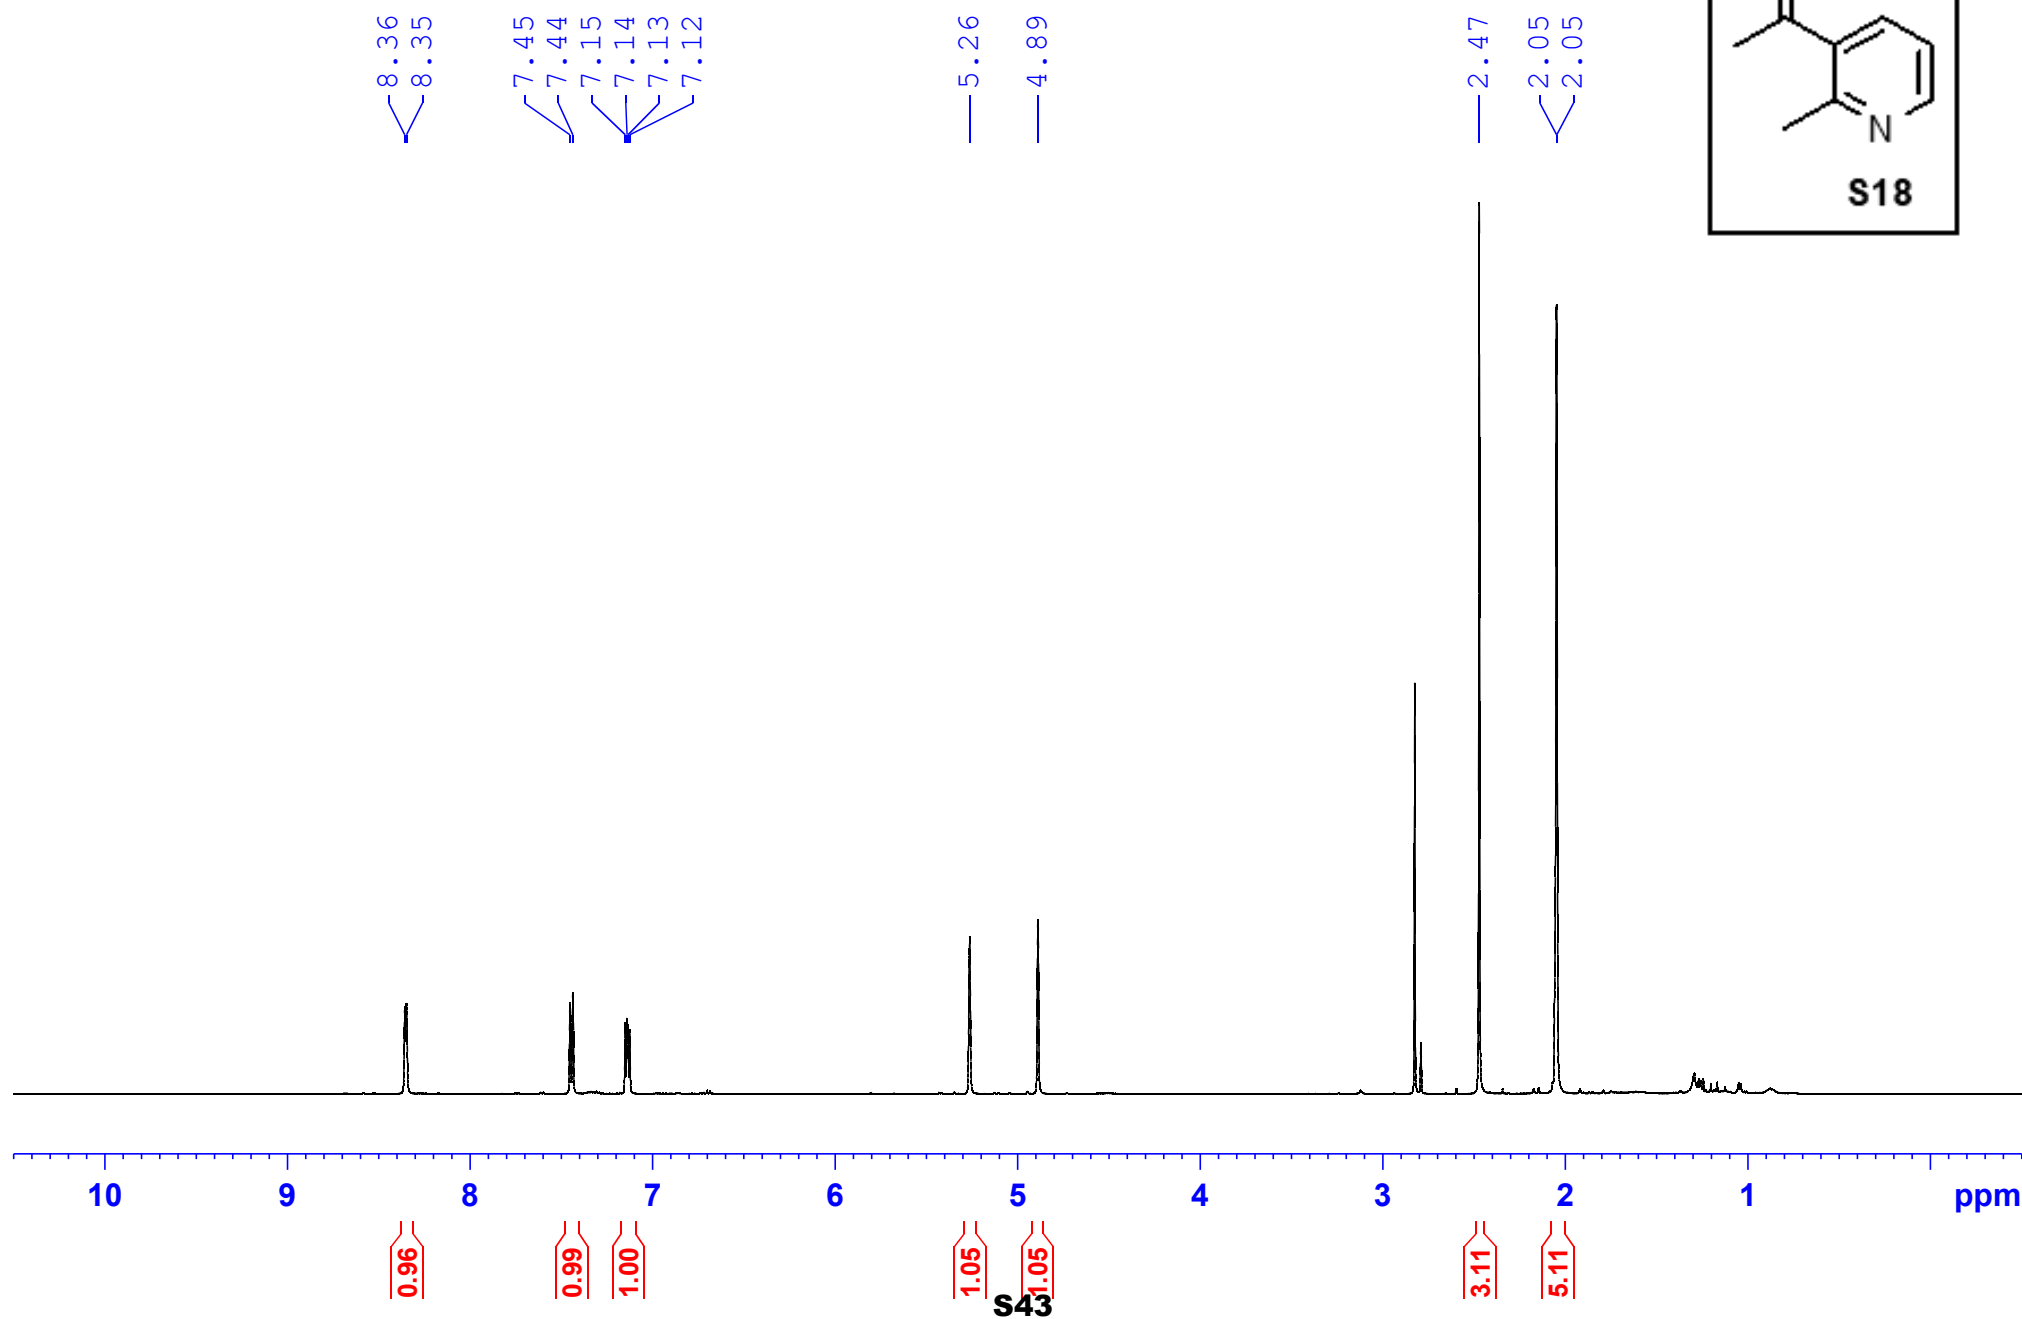

3-Isopropenyl-2-methyl-pyridine (S18)  
CCP-A-163(1)

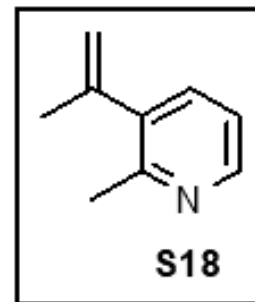

155.5  
148.4  
145.2  
139.2  
135.9  
121.7  
116.2

24.1  
23.0

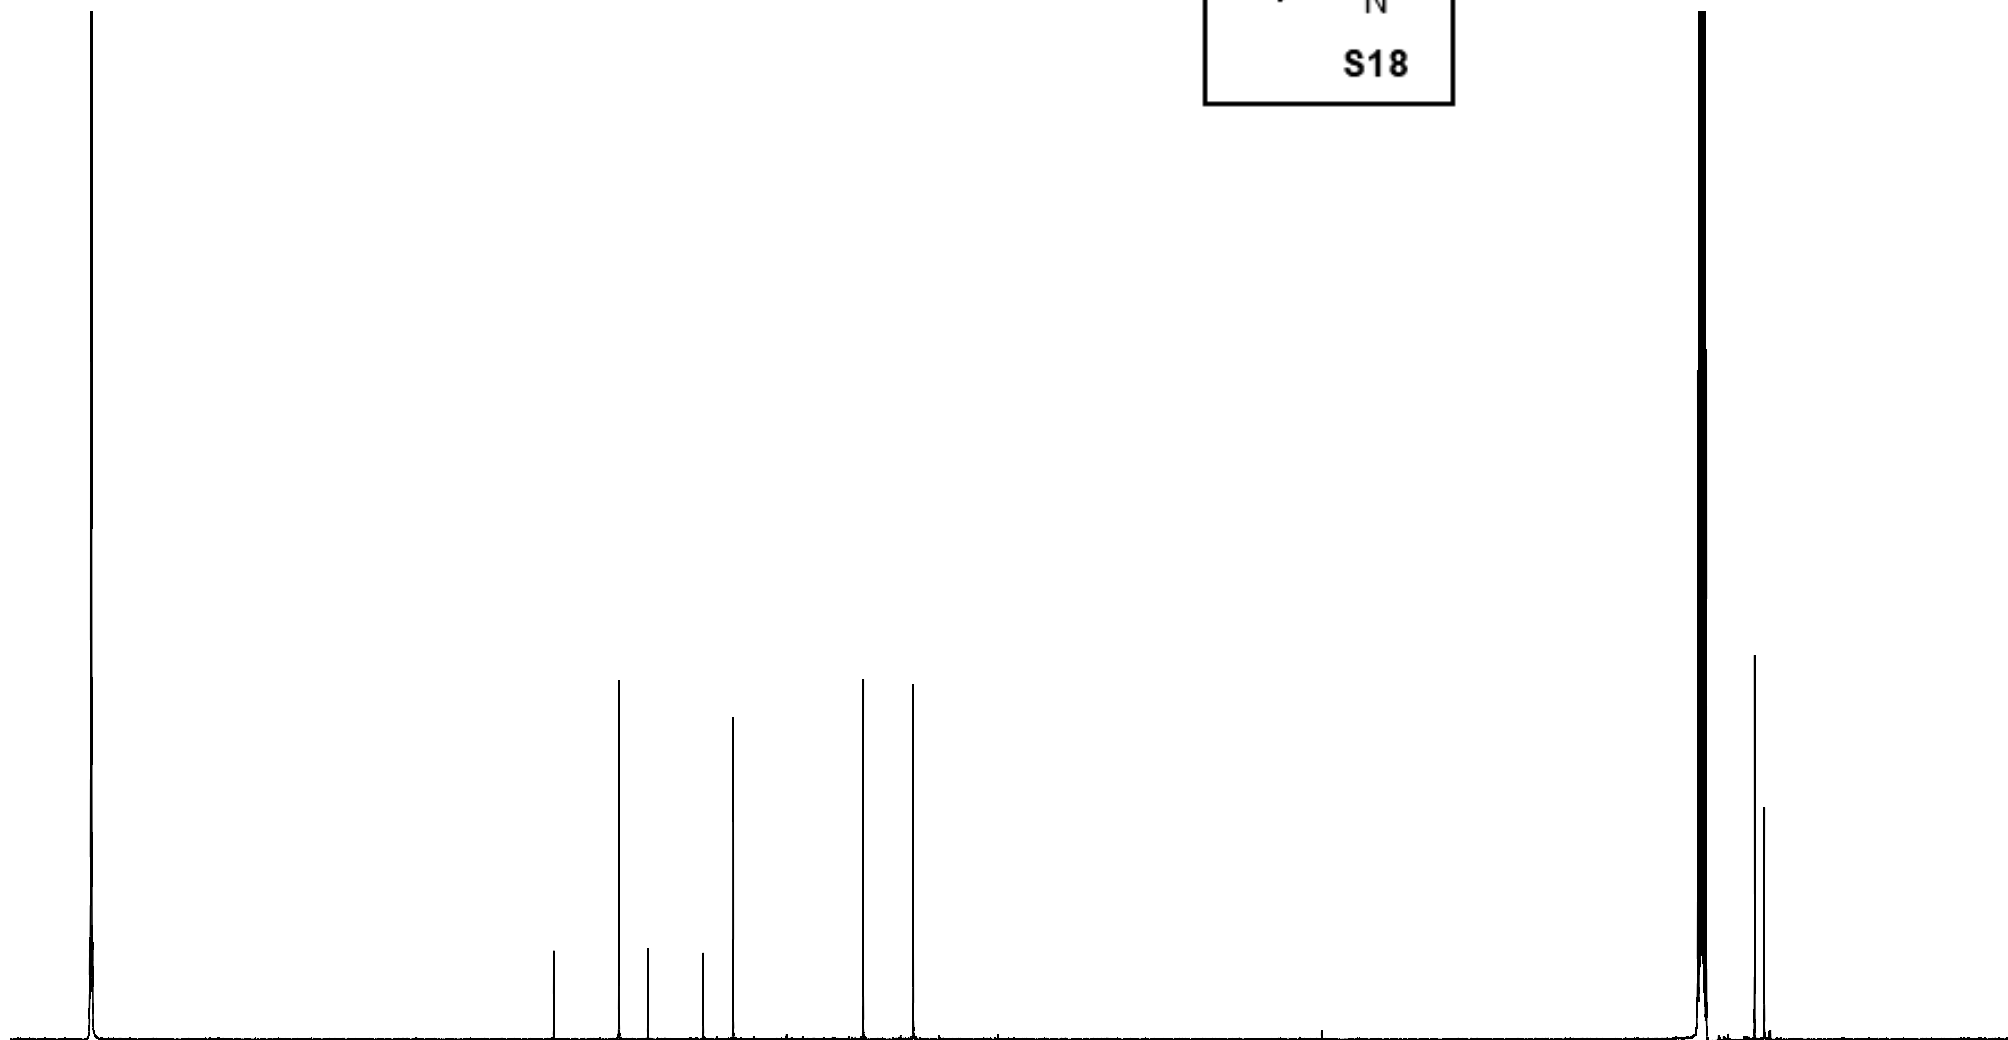

210 200 190 180 170 160 150 140 130 120 110 100 90 80 70 60 50 40 30 20 10 ppm

S44

3-Fluoro-5-isopropenyl-pyridine (S19)  
ZZG-J-19(4)

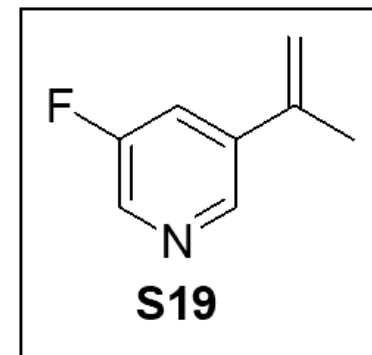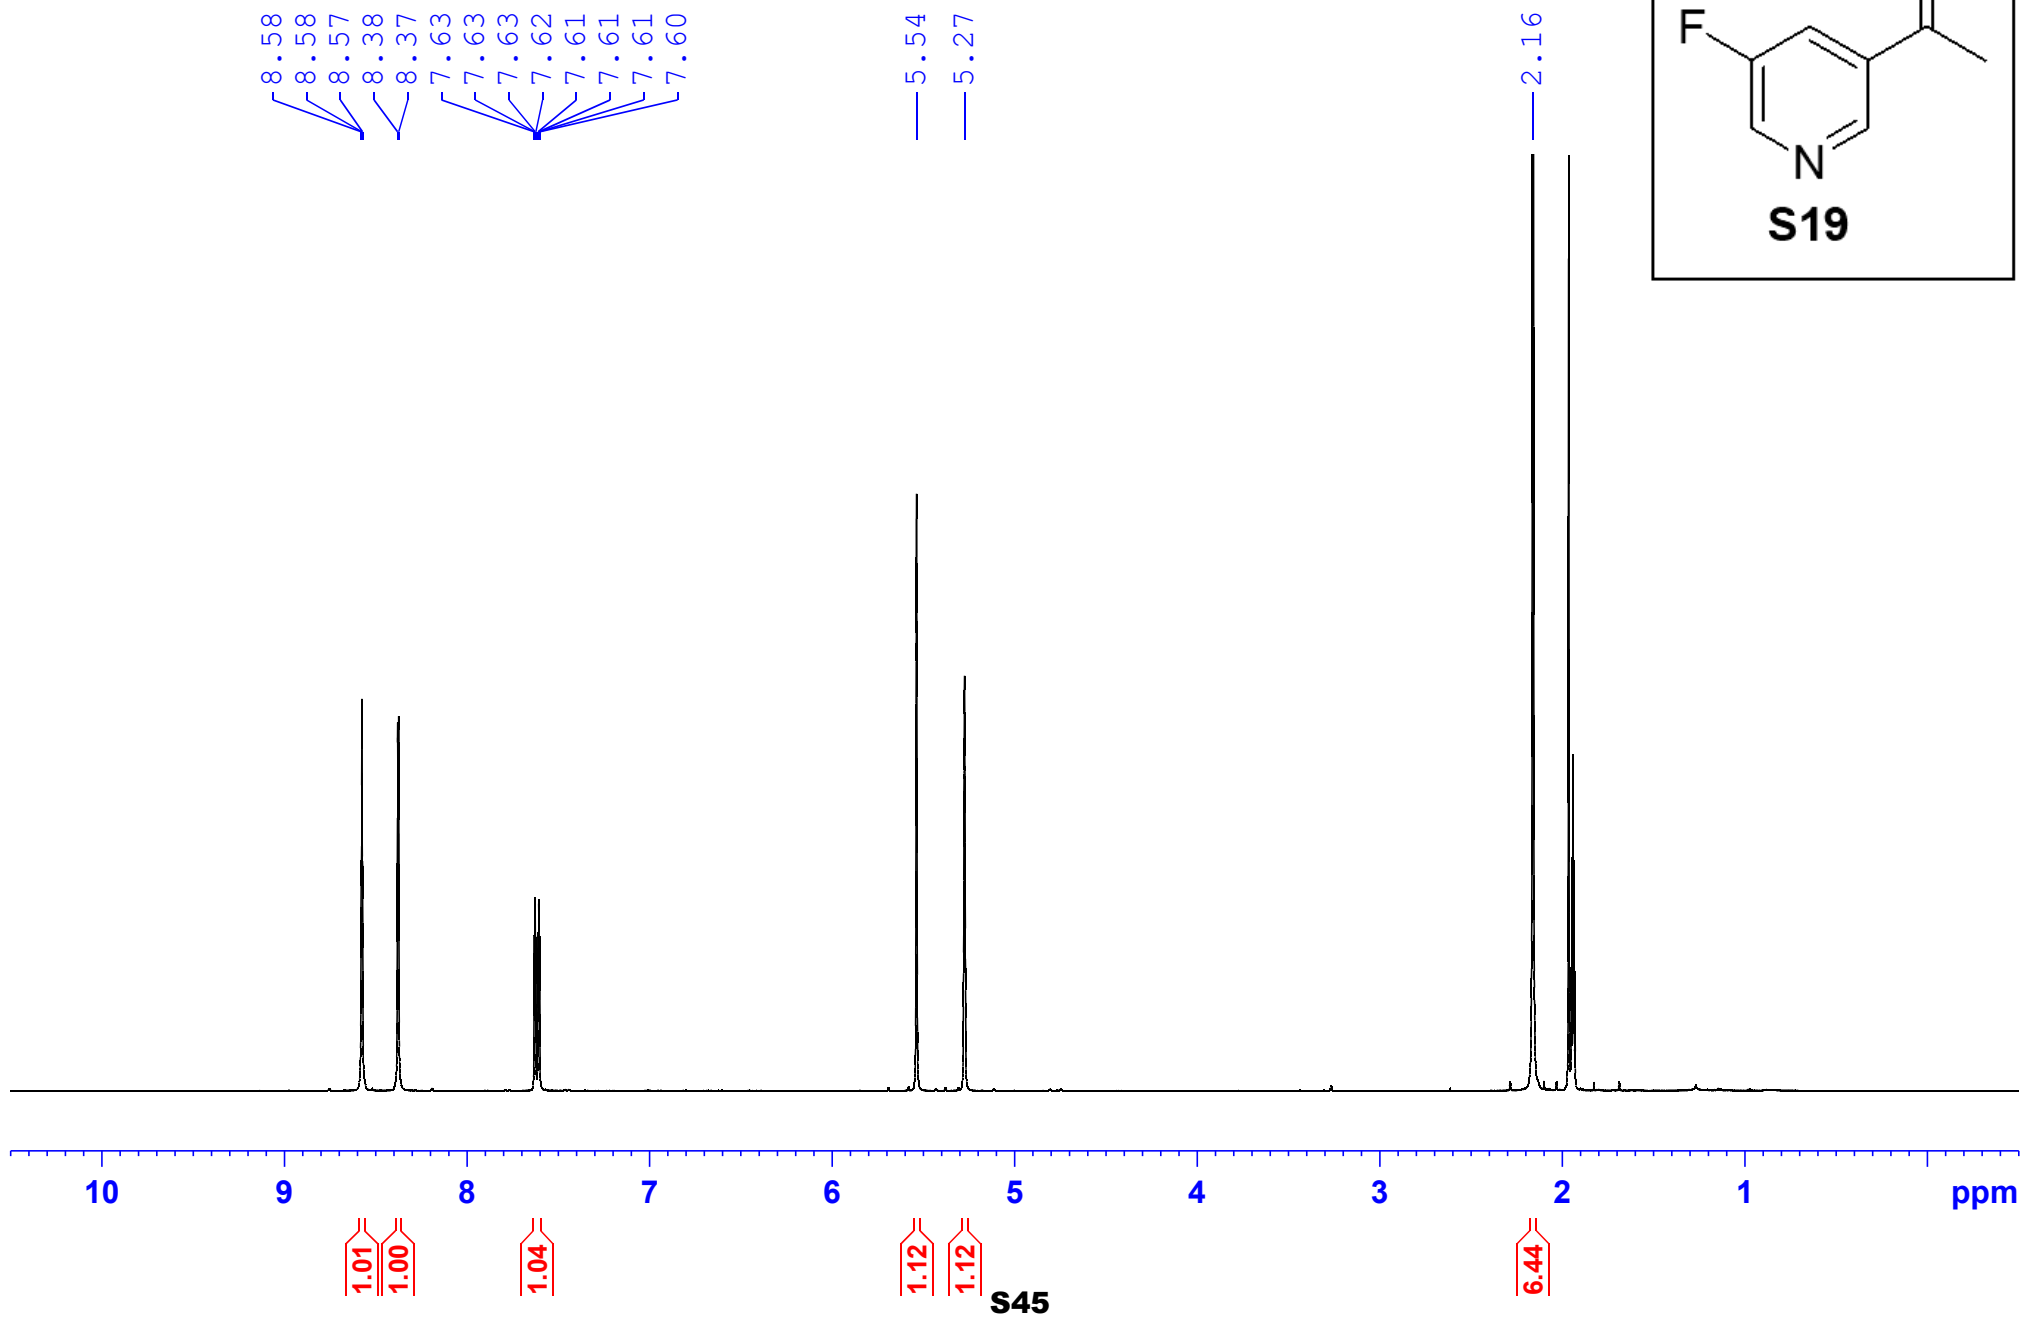

3-Fluoro-5-isopropenyl-pyridine (S19)  
ZZG-J-19(4)

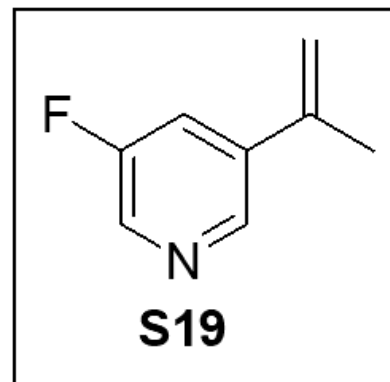

161.6  
159.6  
144.0  
144.0  
140.7  
139.2  
139.2  
137.5  
137.4  
120.4  
120.3  
118.3  
116.1

21.5

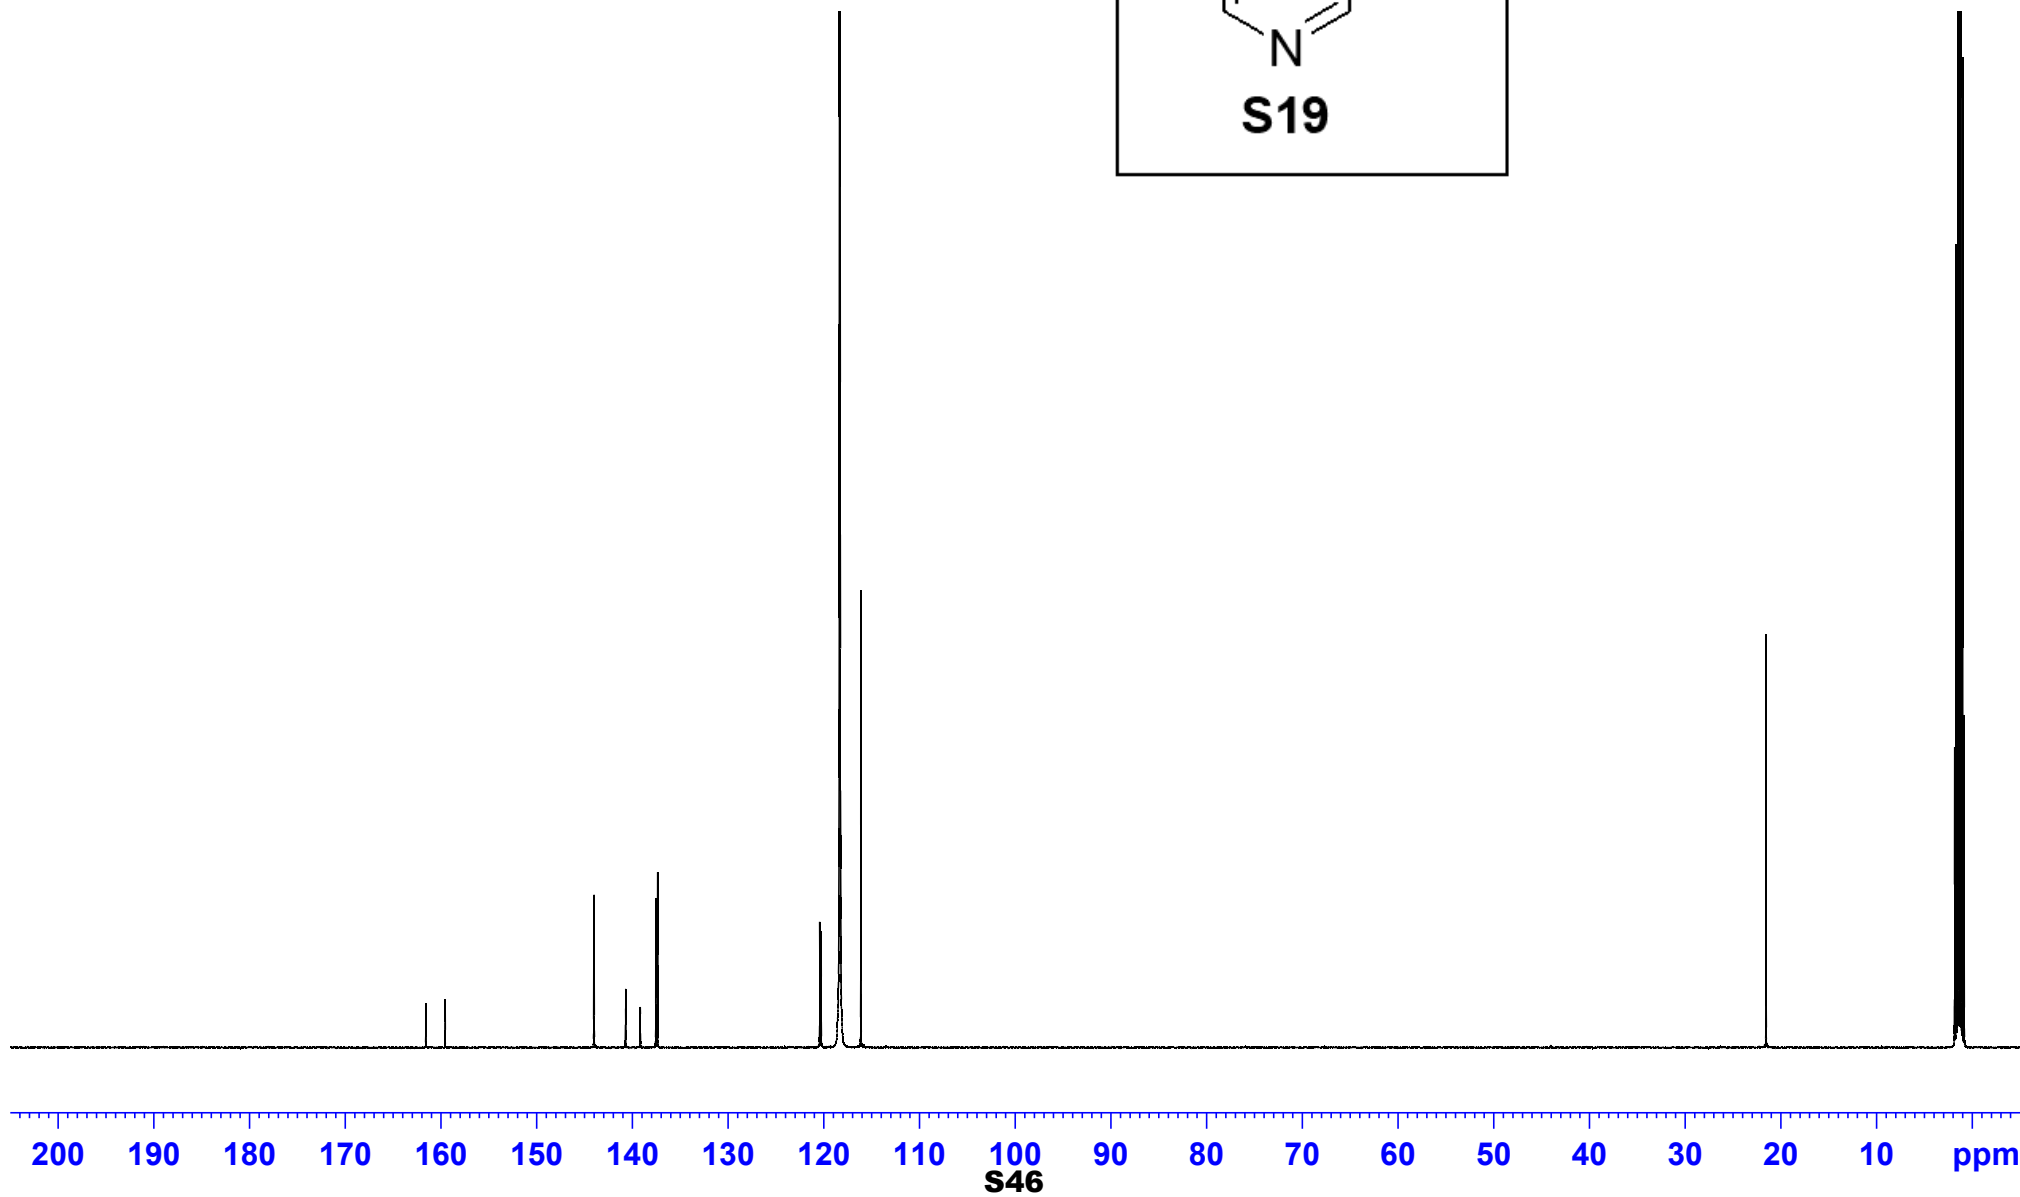

3-Fluoro-5-isopropenyl-pyridine (S19)  
ZZG-J-19(4)

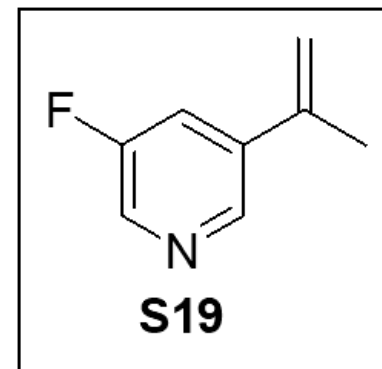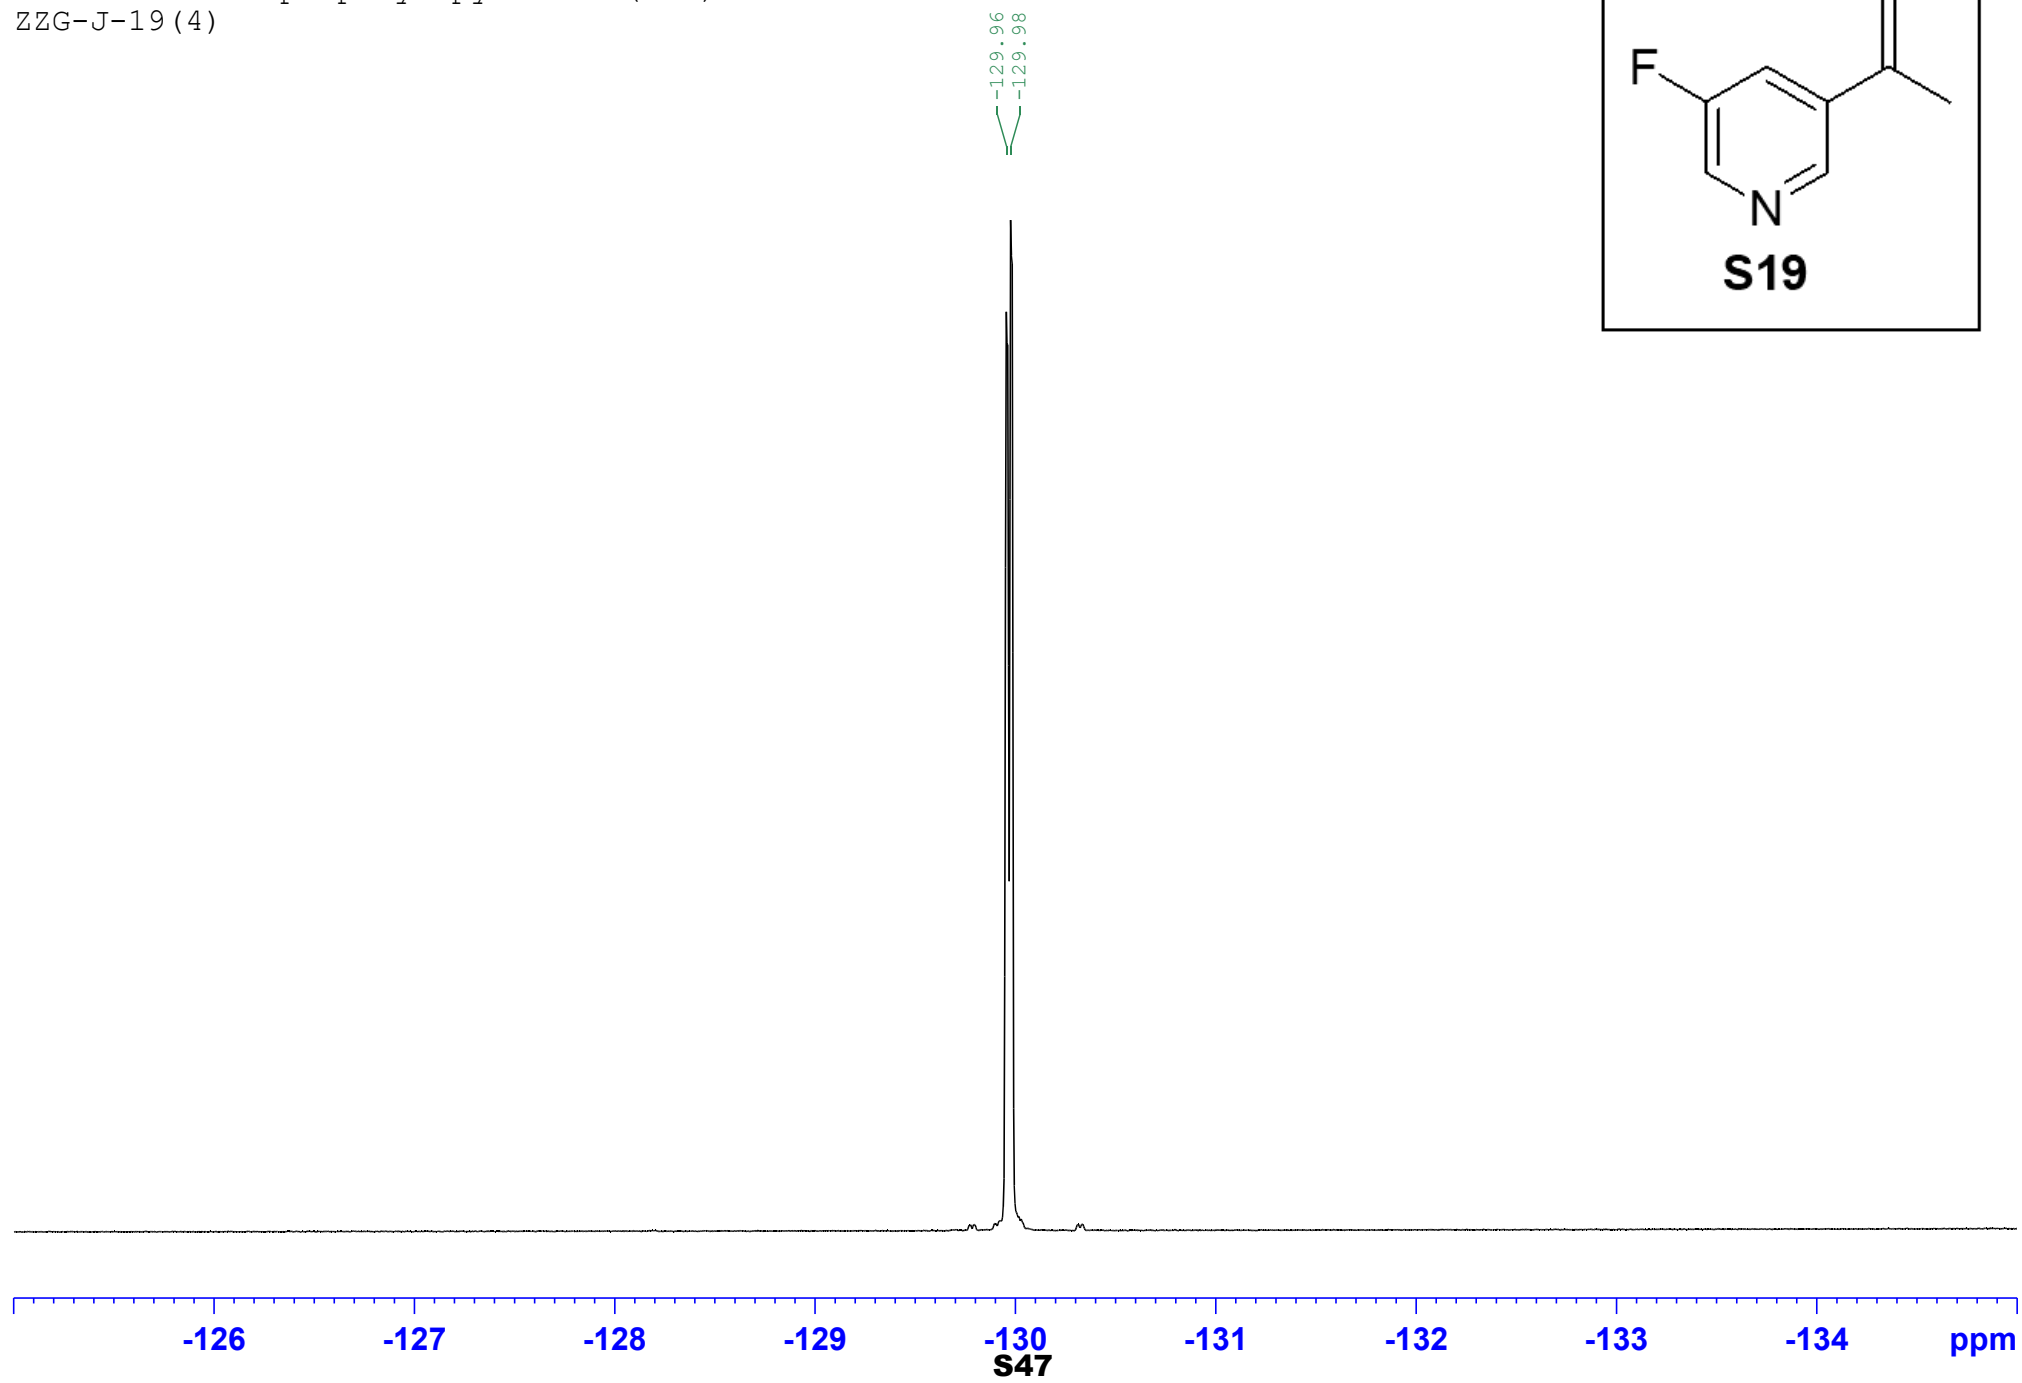

3-Isopropenyl-5-methoxy-pyridine (S20)  
CCP-A-55 (3)

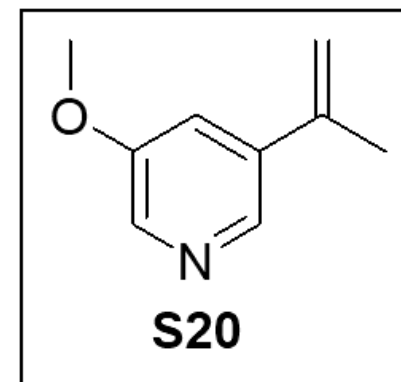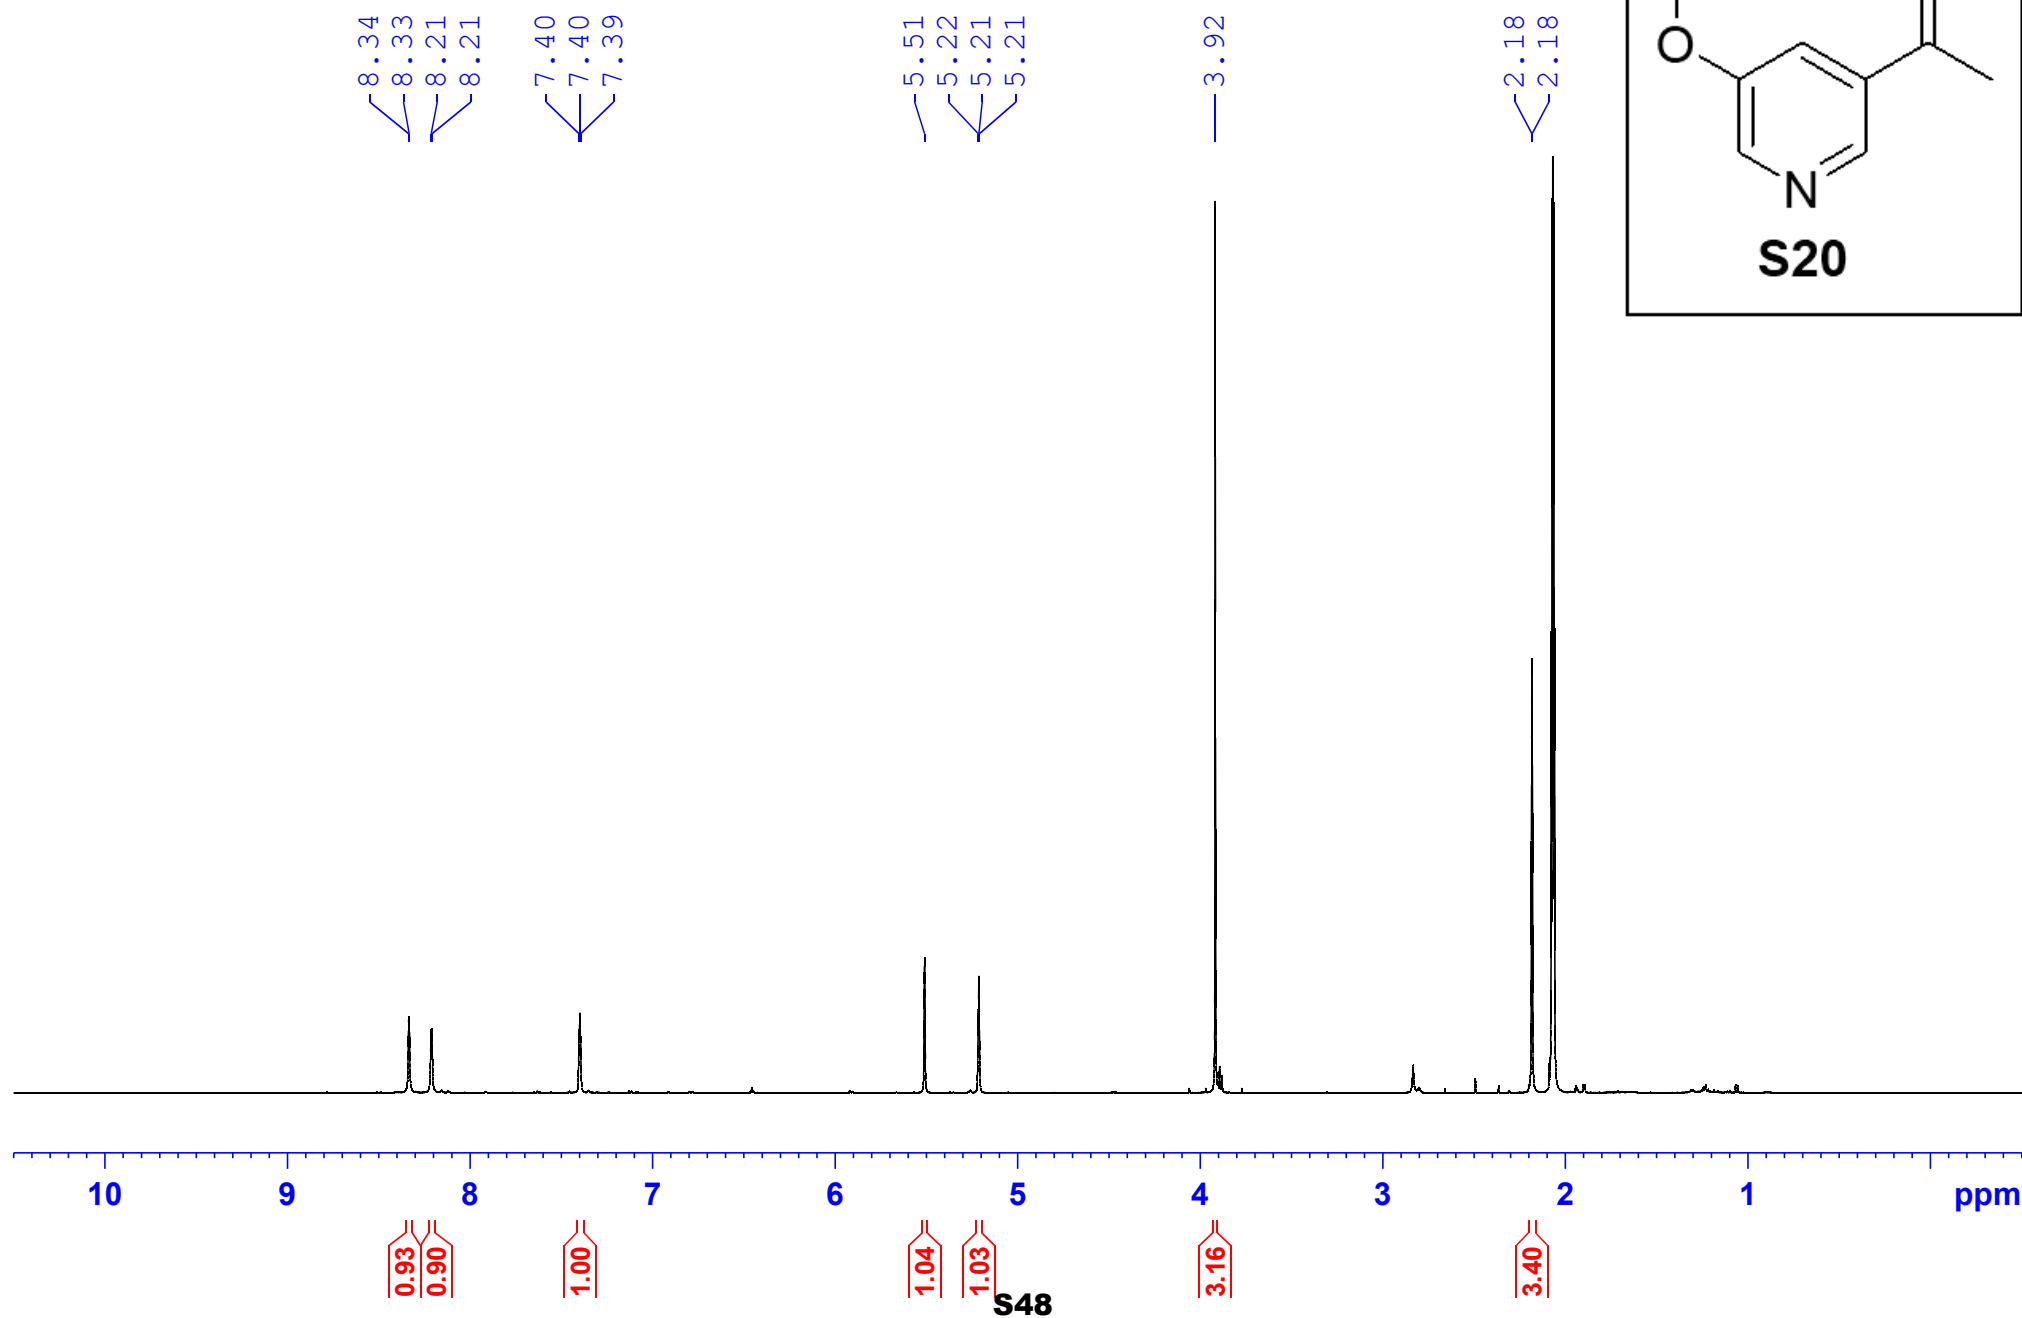



3-Isopropenyl-5-methoxy-pyridine (S20)  
CCP-A-55(4)

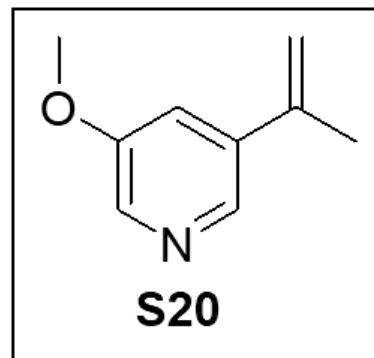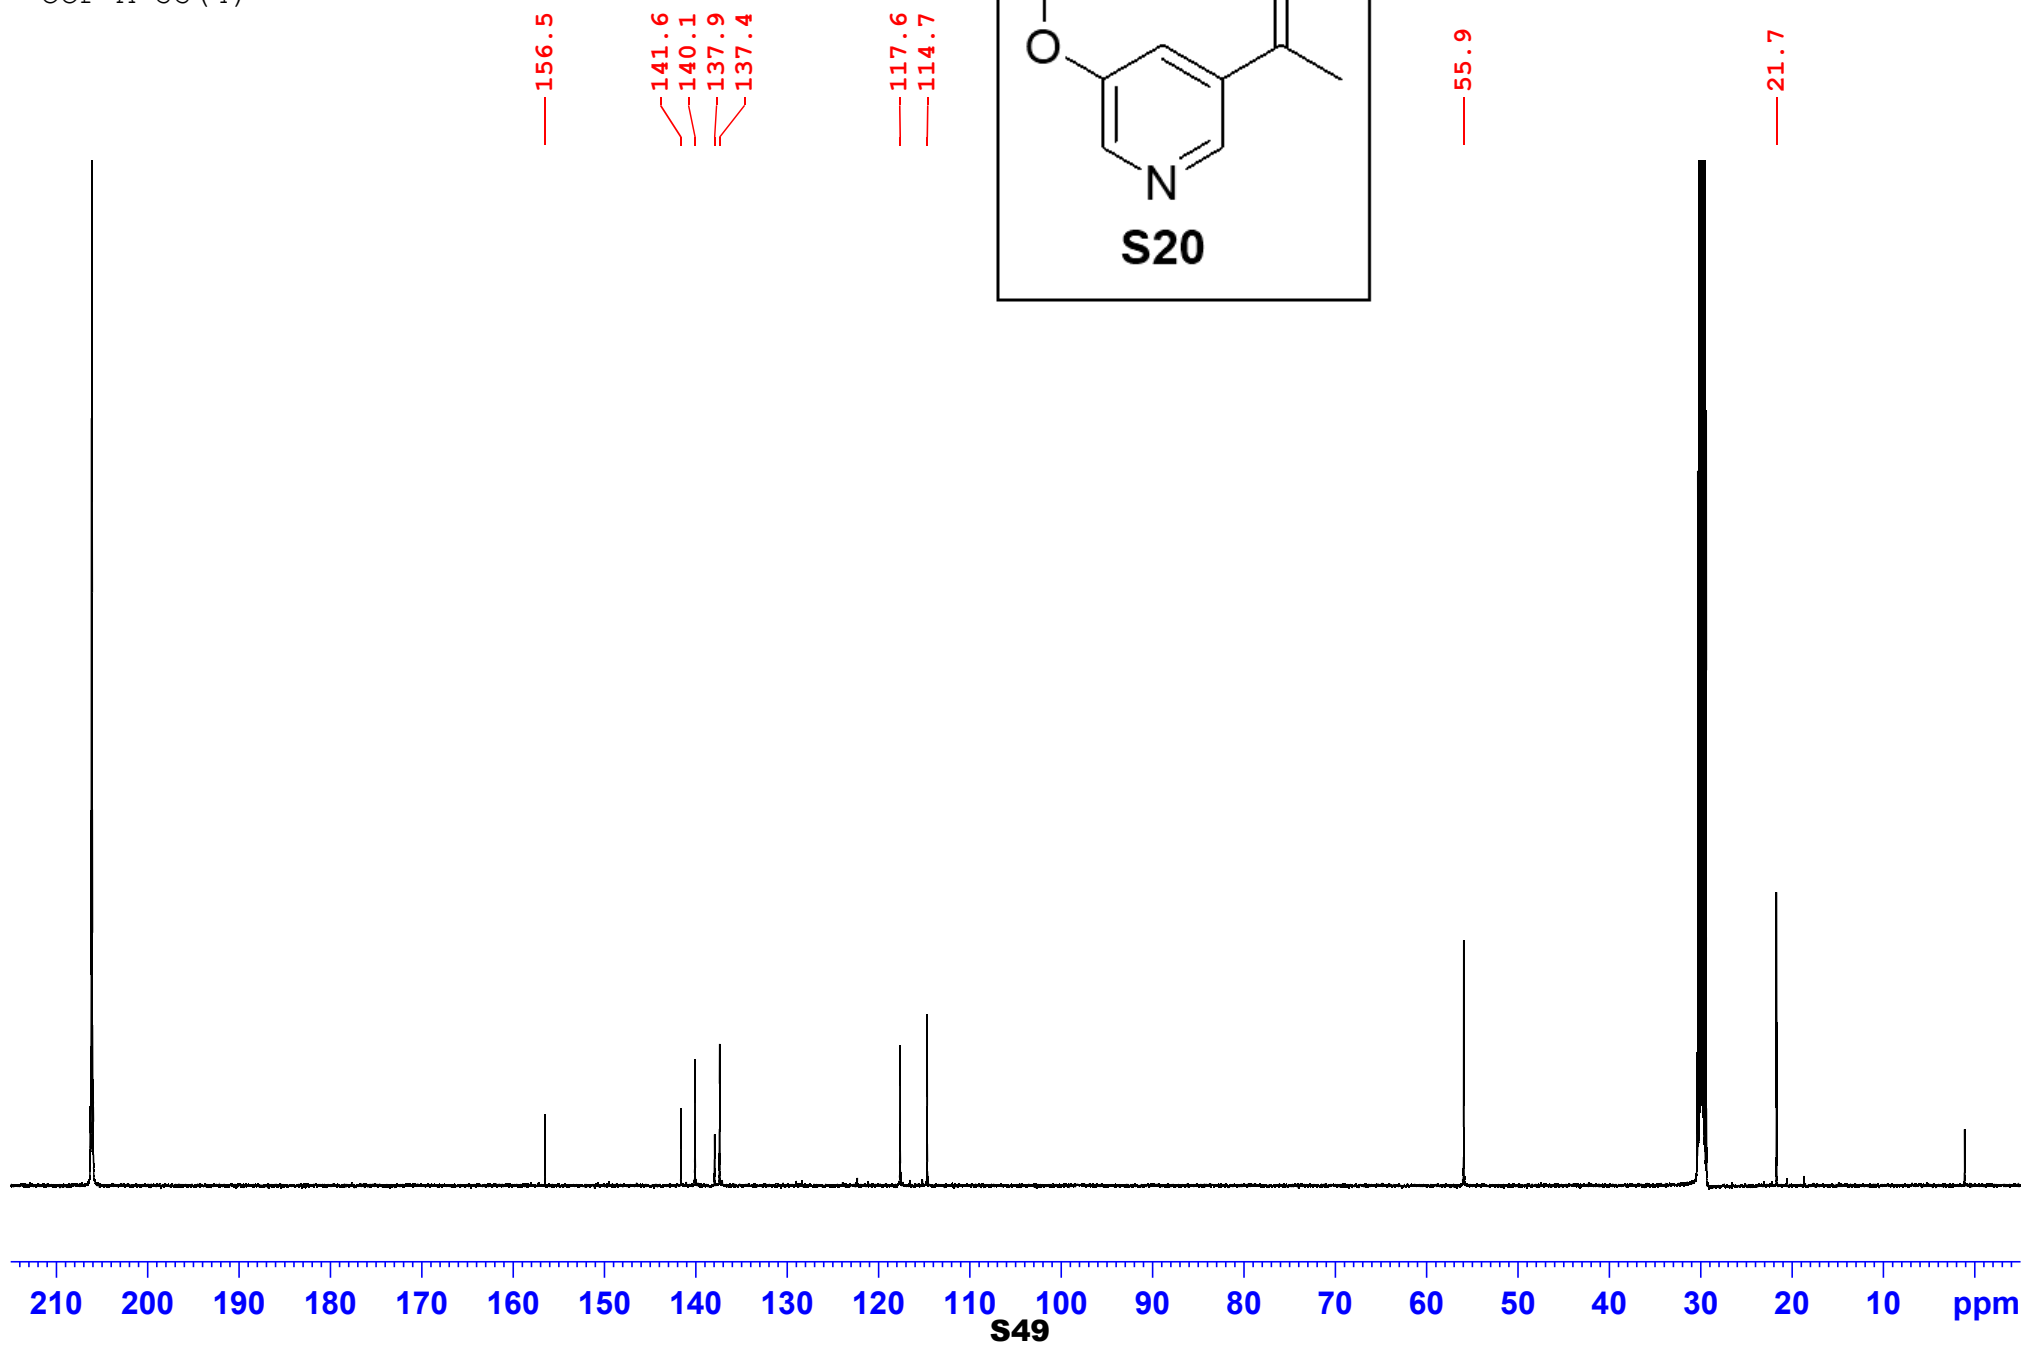

2,5-Diisopropenyl-pyridine (S21)  
CCP-A-93 (3)

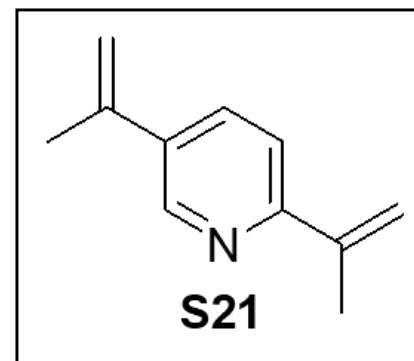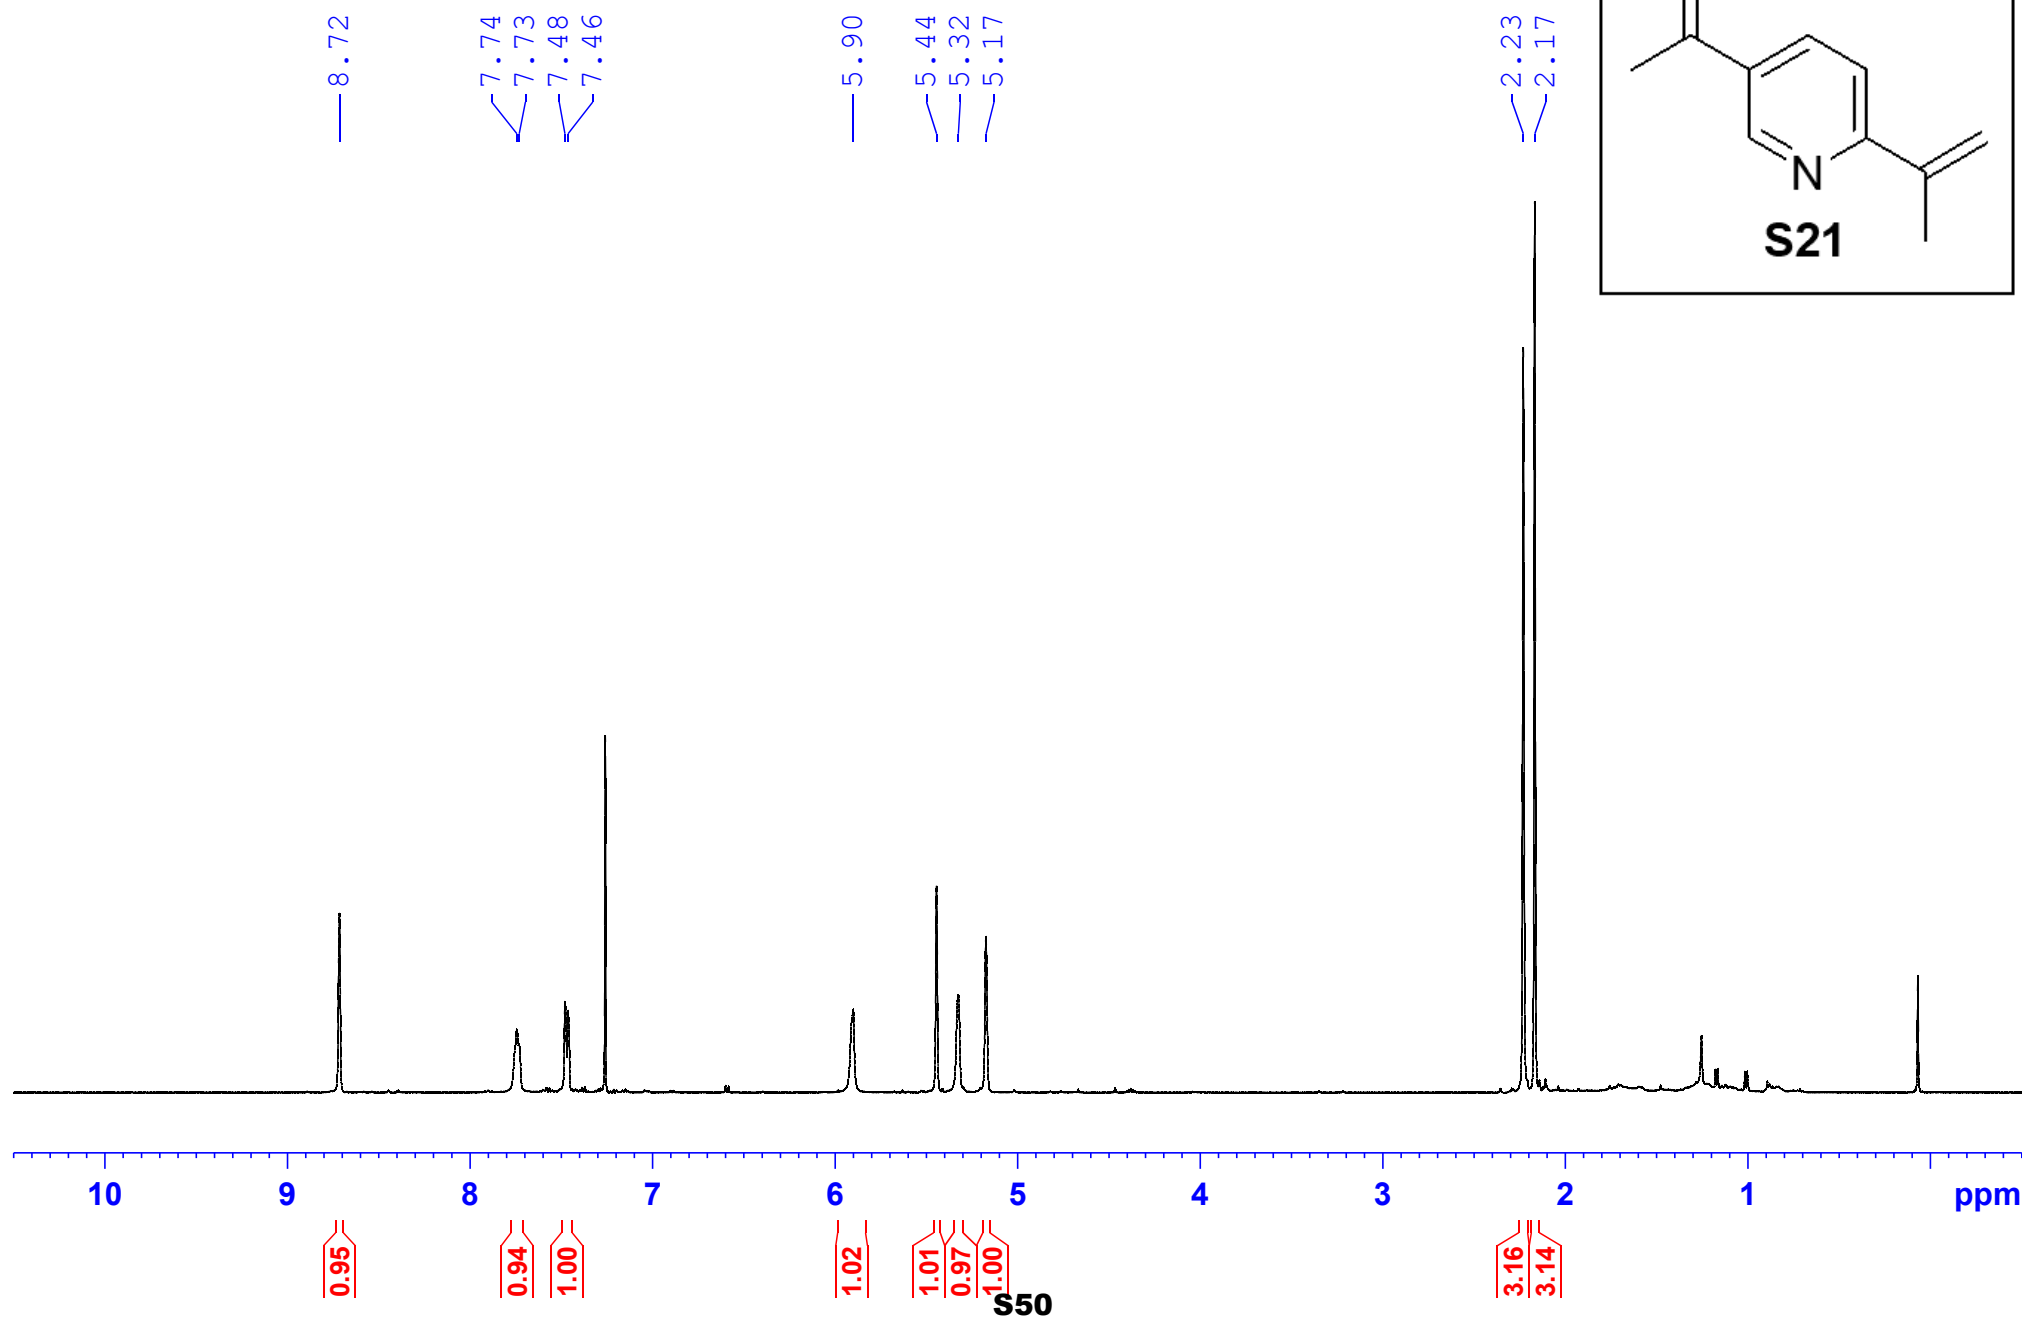

2,5-Diisopropenyl-pyridine (S21)  
CCP-A-93 (4)

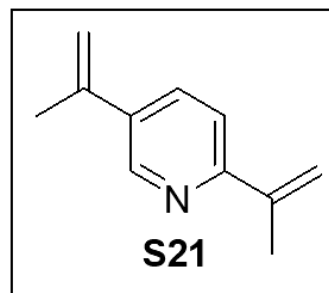

157.6  
146.8  
144.0  
141.4  
135.5  
133.7  
119.7  
115.4  
114.0

21.5  
20.5

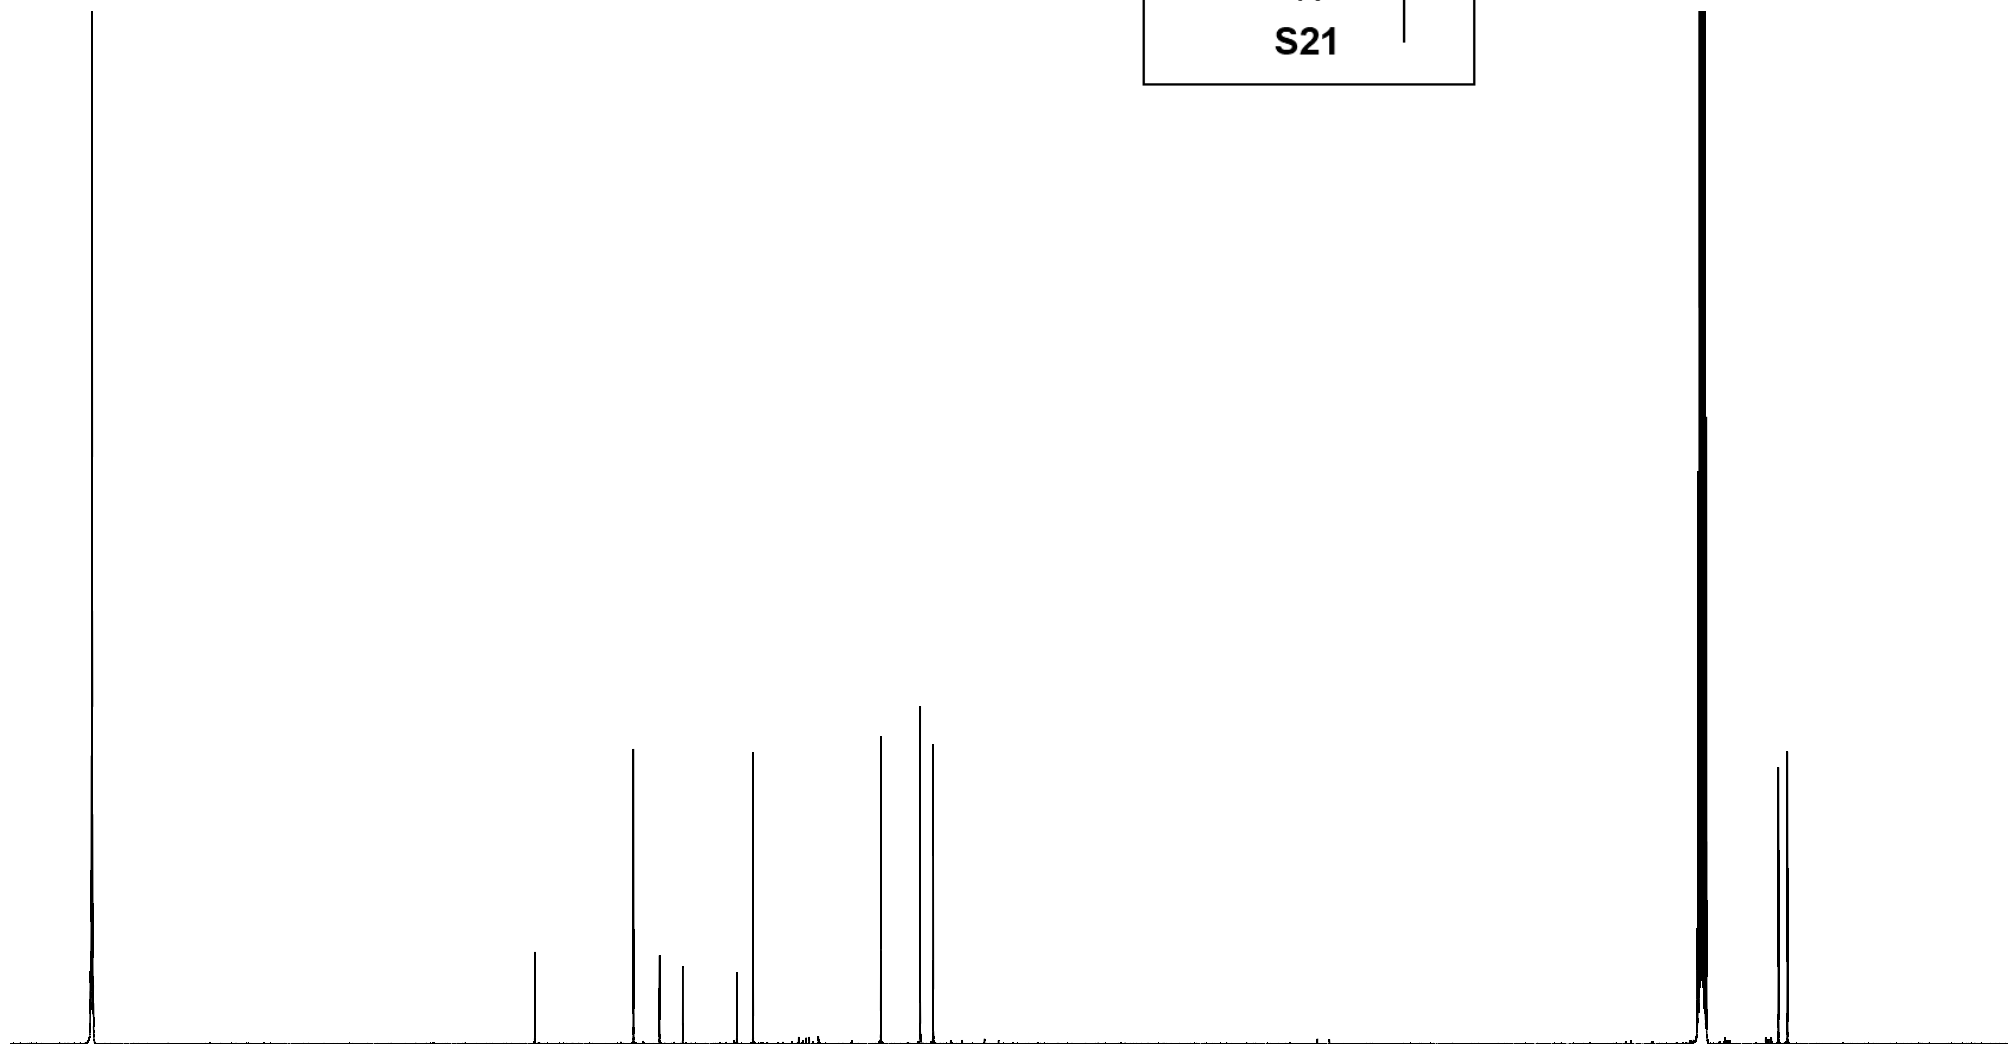

210 200 190 180 170 160 150 140 130 120 110 100 90 80 70 60 50 40 30 20 10 ppm

S51

1-(6-Isopropenyl-pyridin-2-yl)-ethanone (S22)  
CCP-A-101 (3)

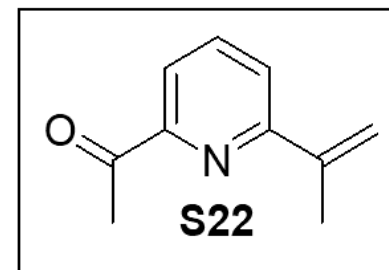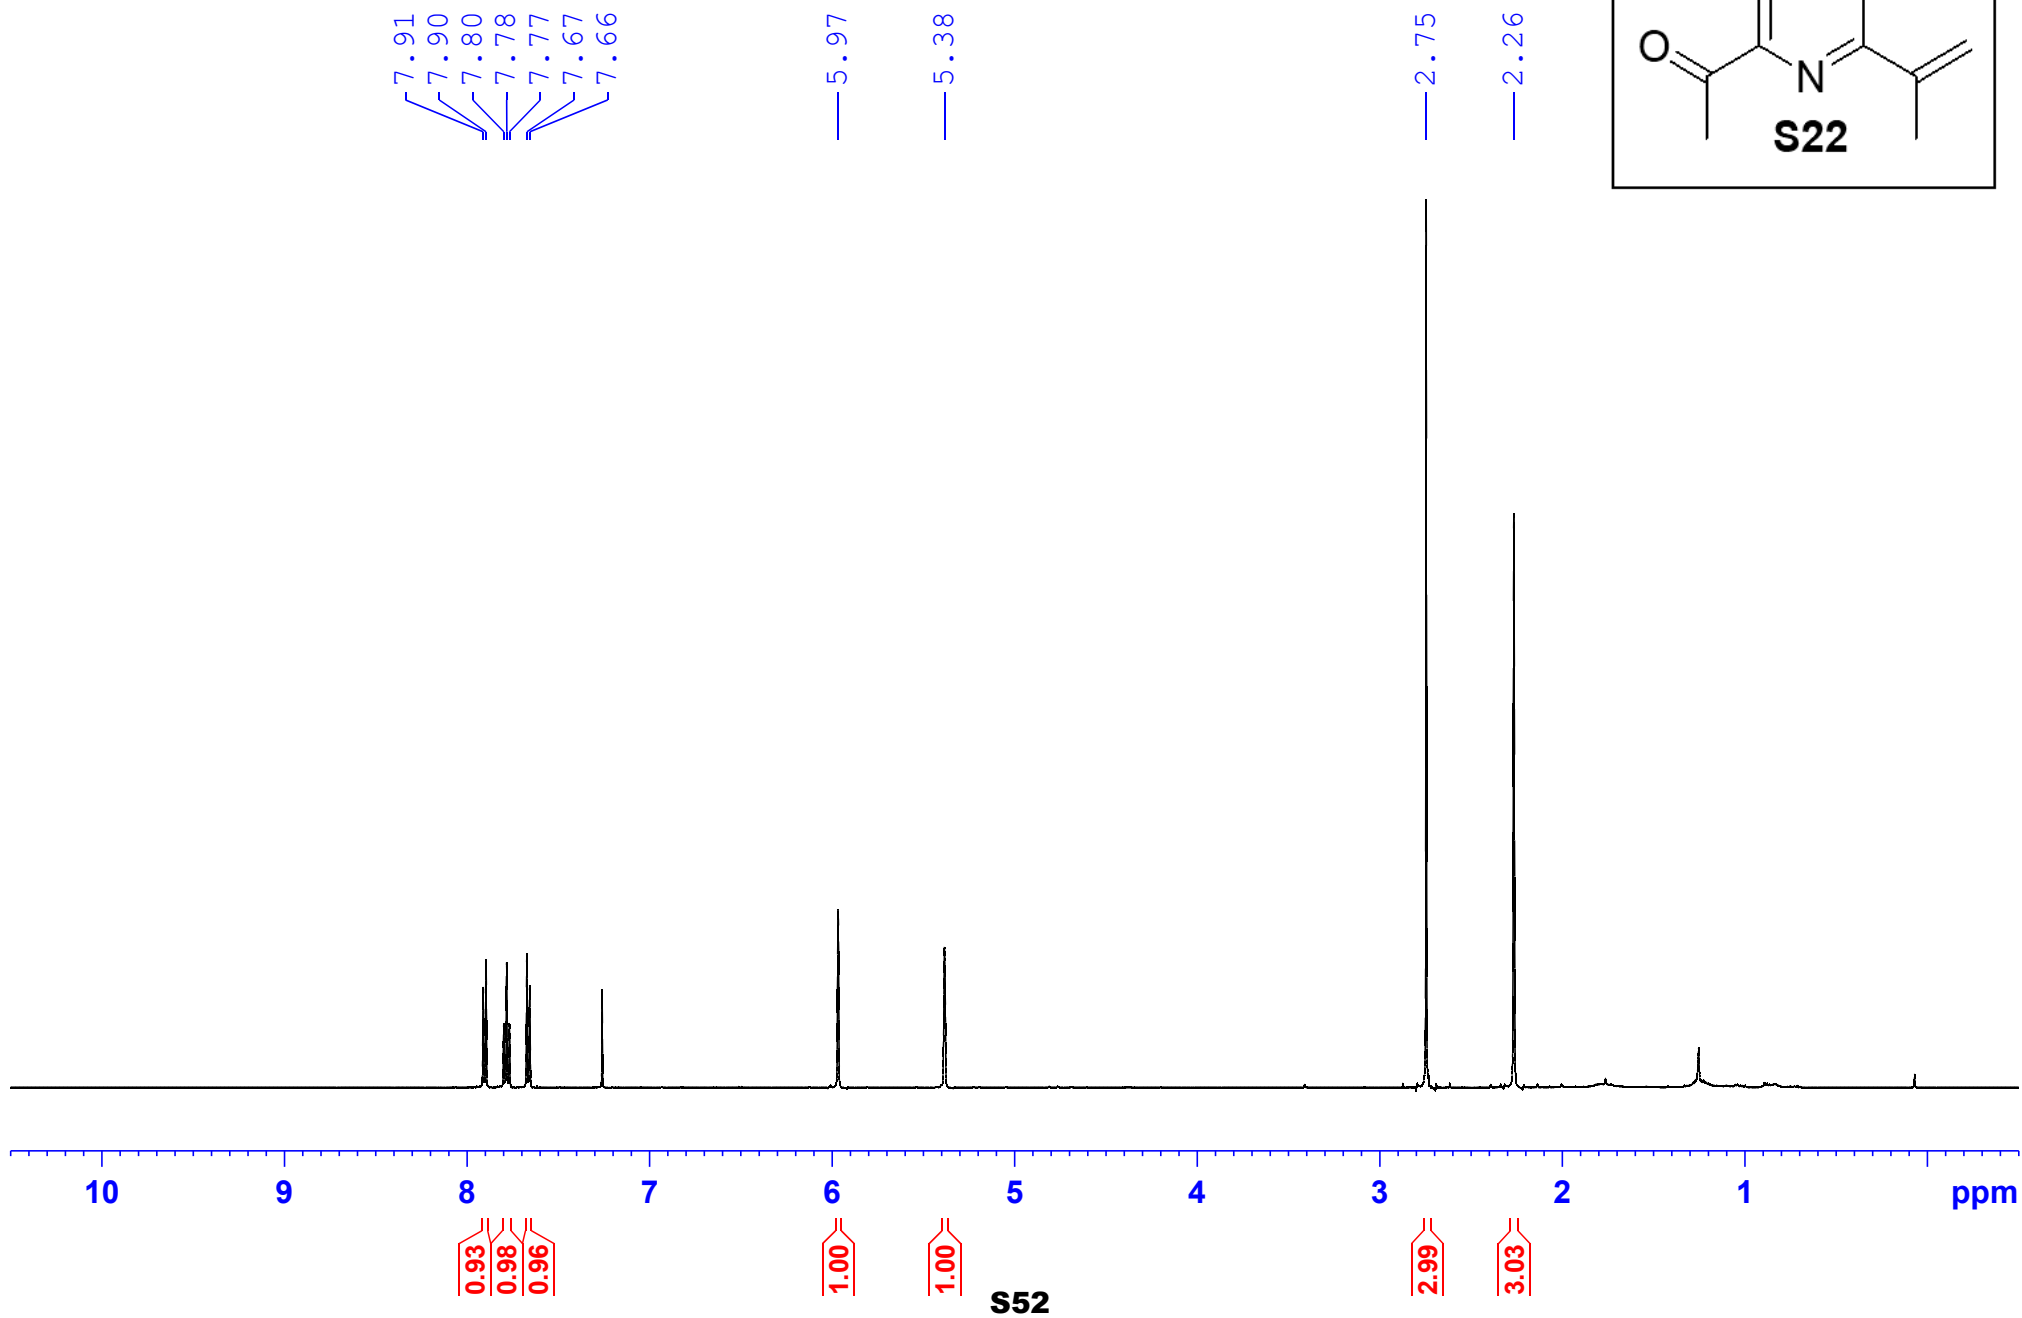

1-(6-Isopropenyl-pyridin-2-yl)-ethanone (S22)  
CCP-A-101(4)

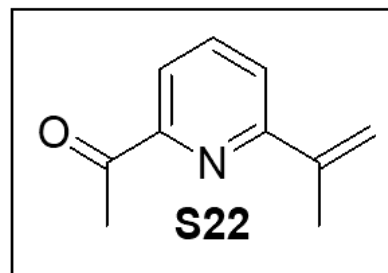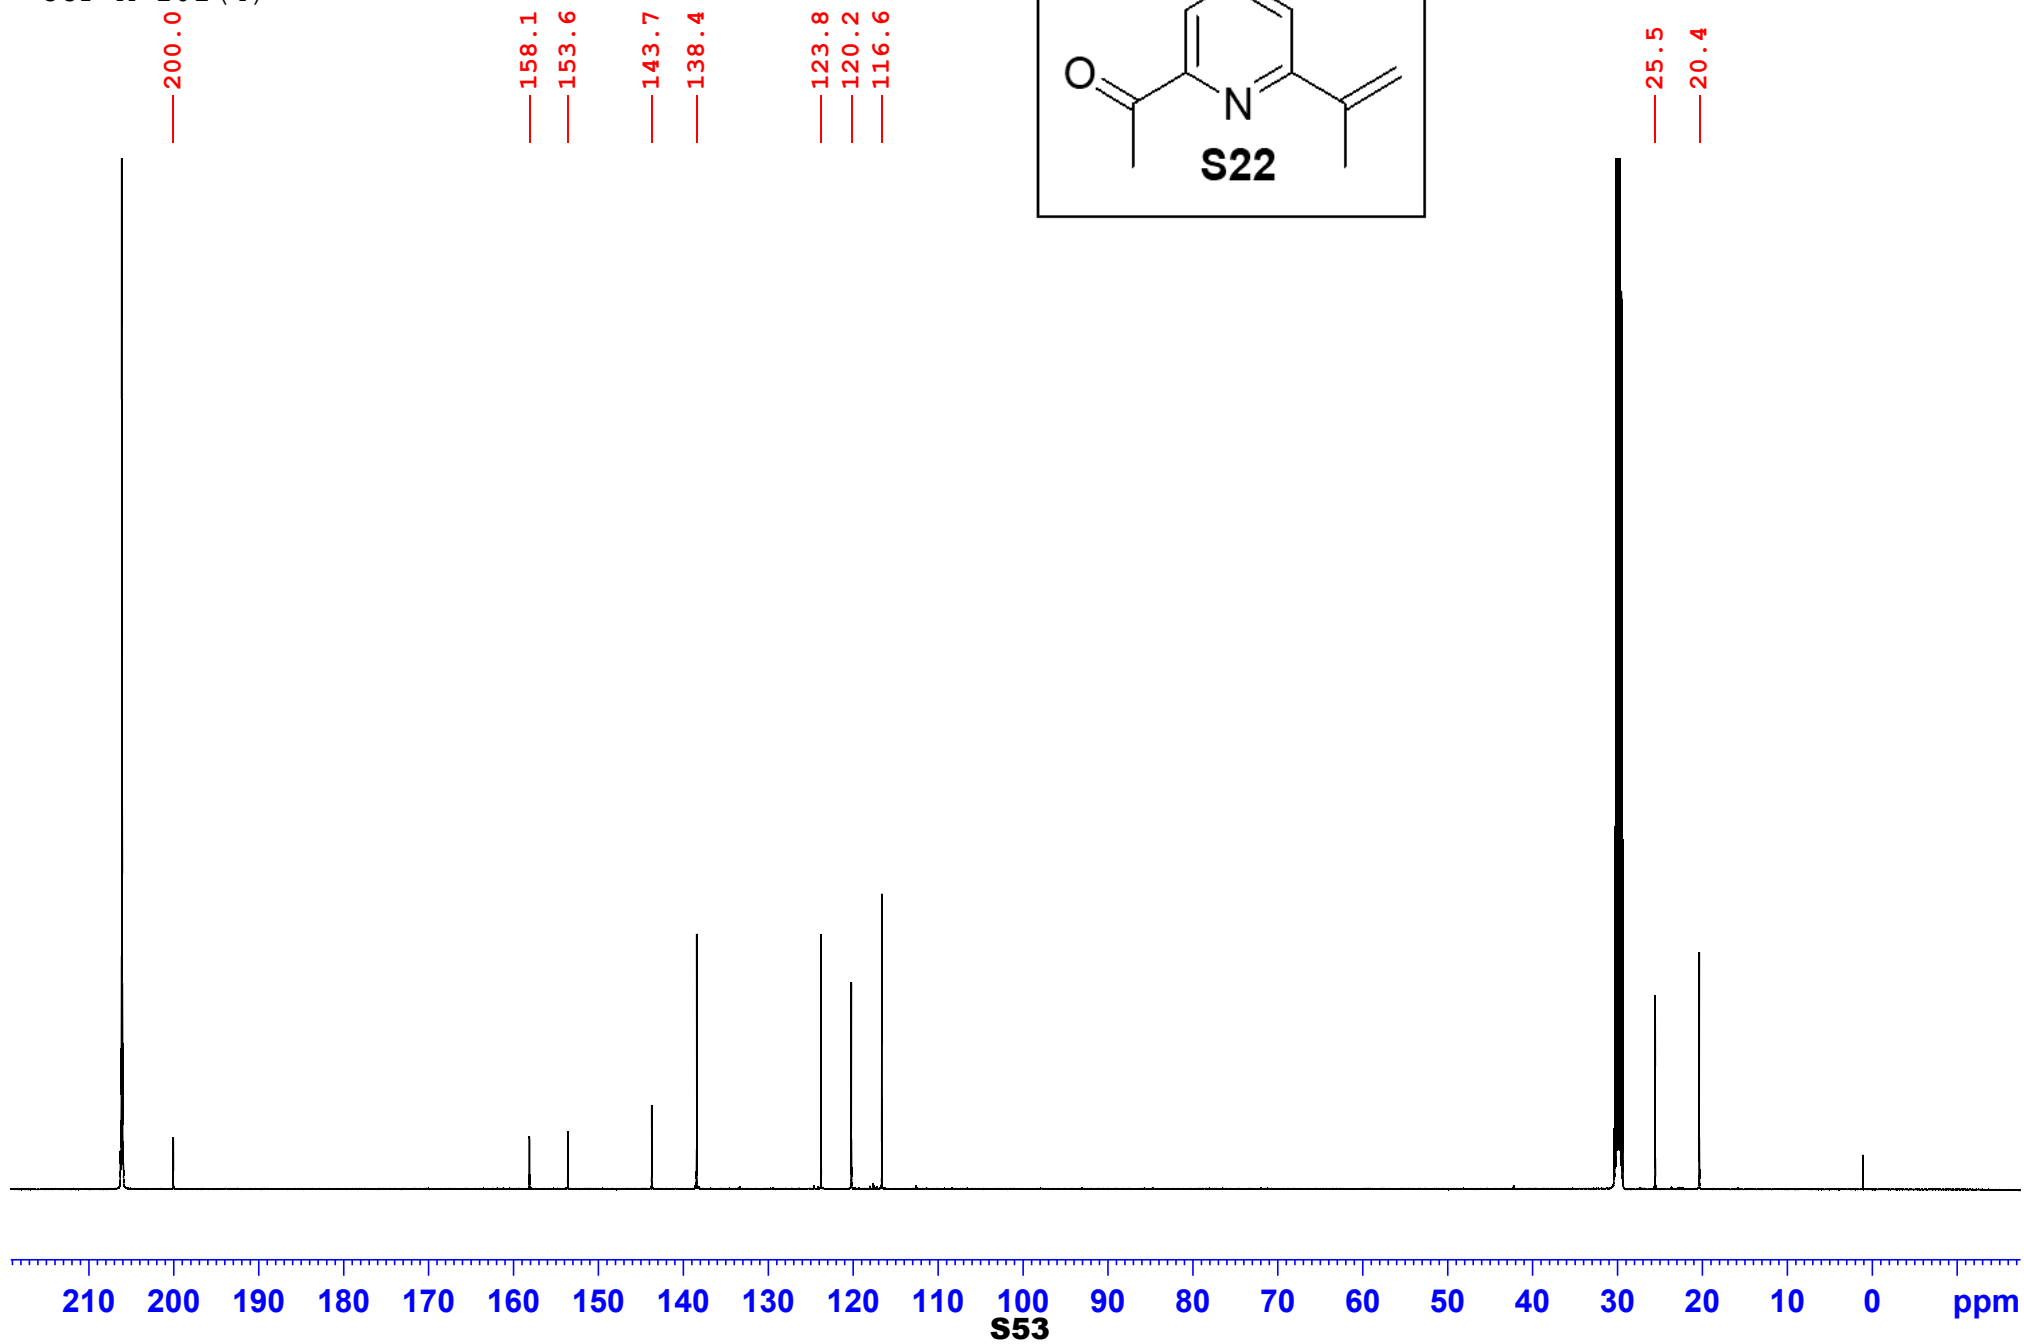

2,6-Diisopropenyl-pyridine (S23)  
CCP-A-95 (3)

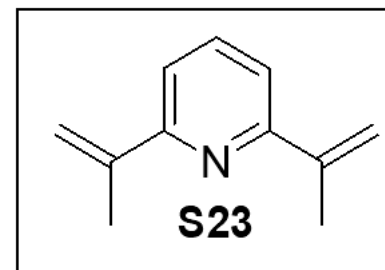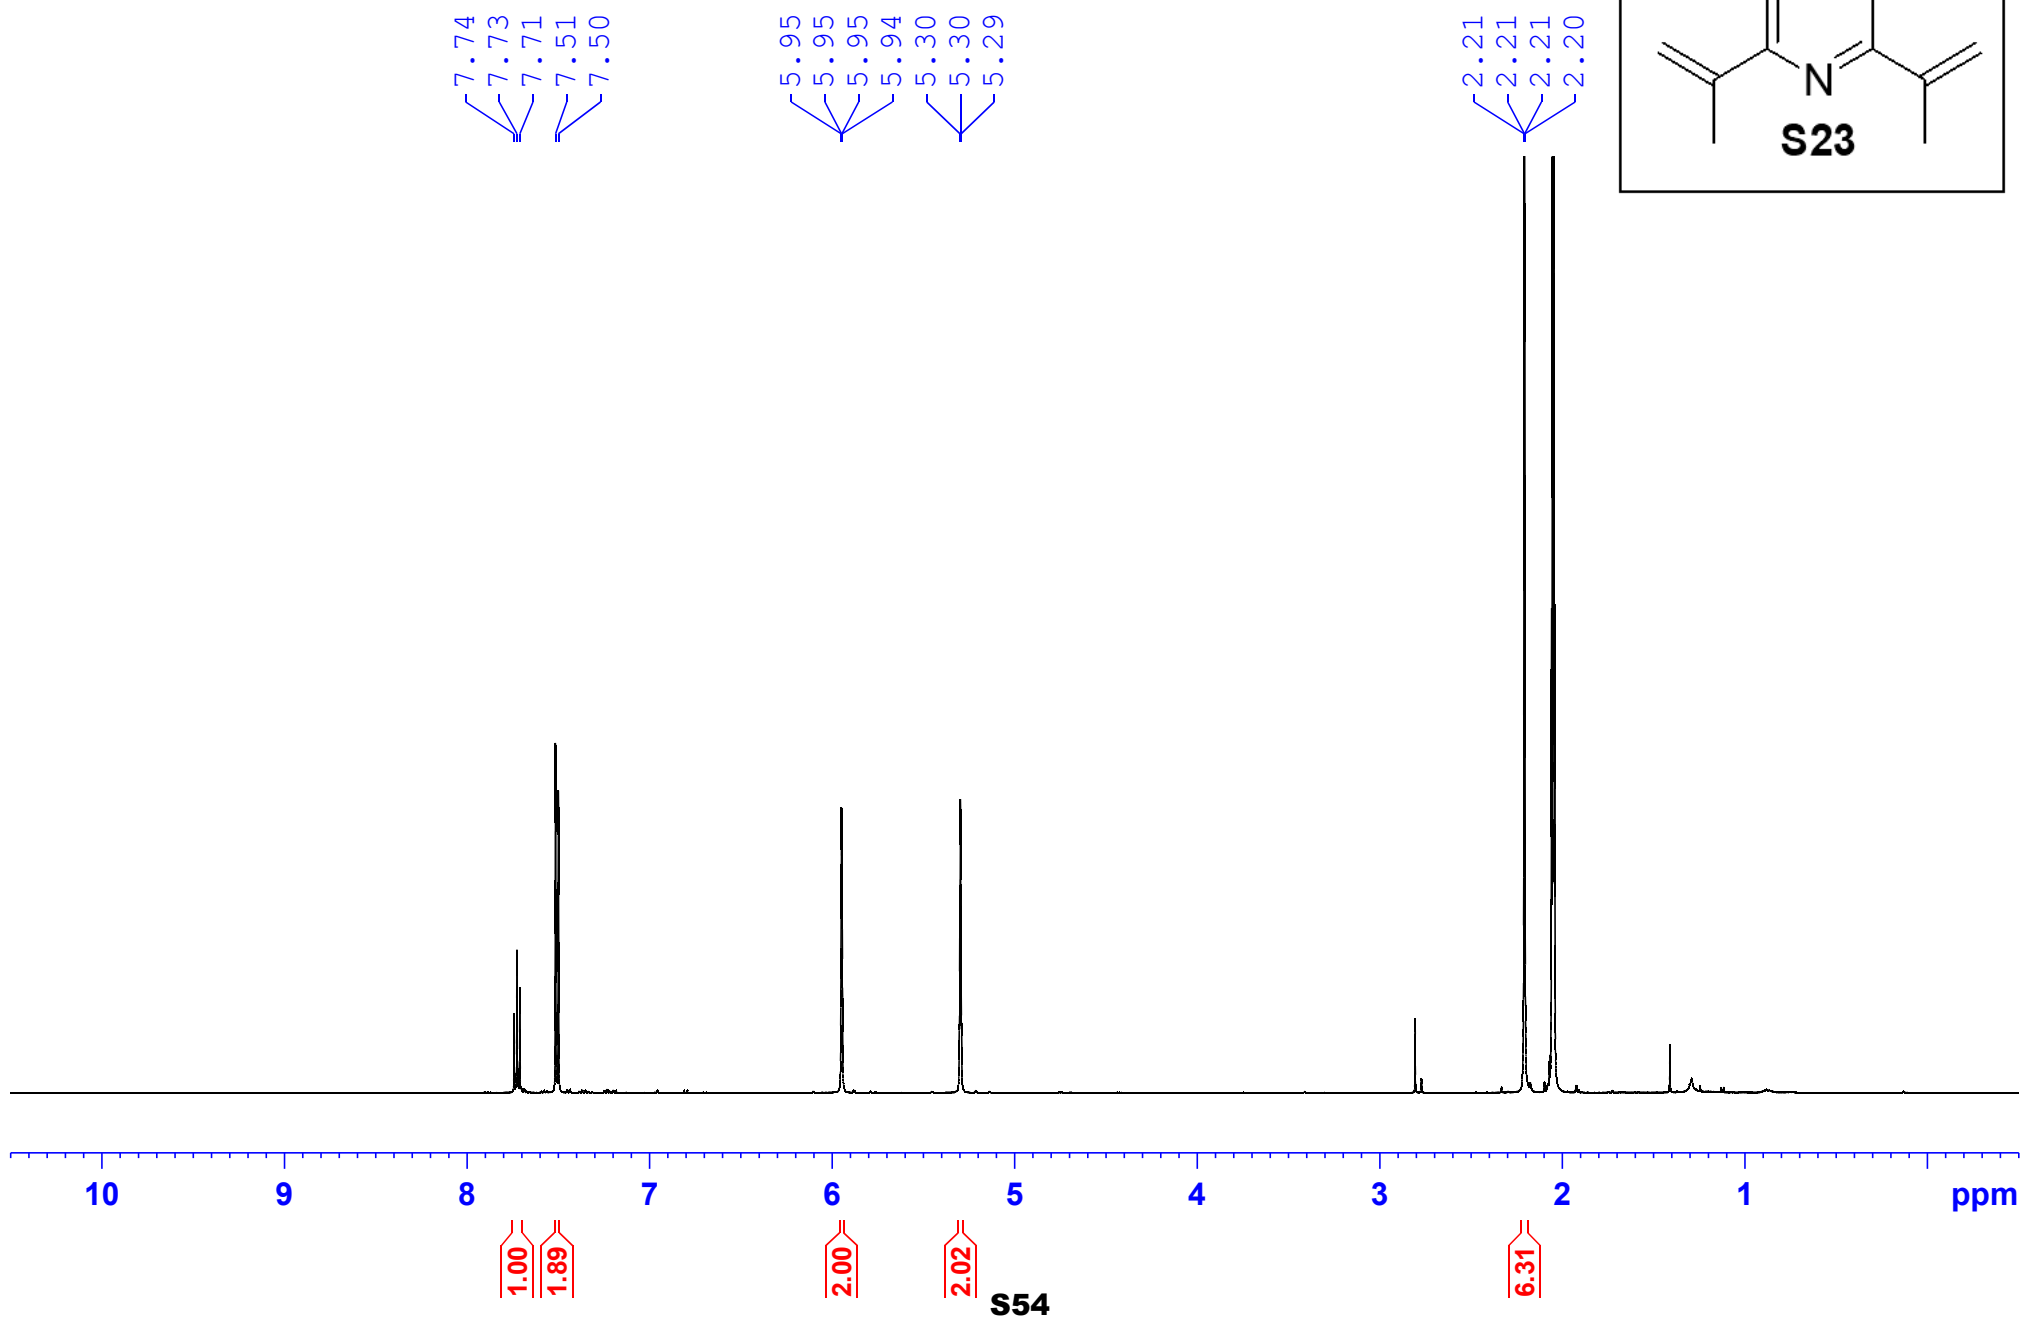

2,6-Diisopropenyl-pyridine (S23)  
CCP-A-95 (3)

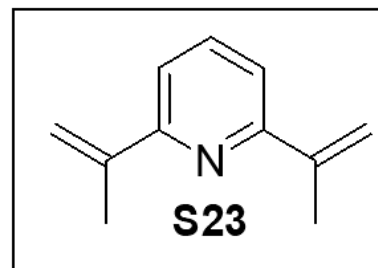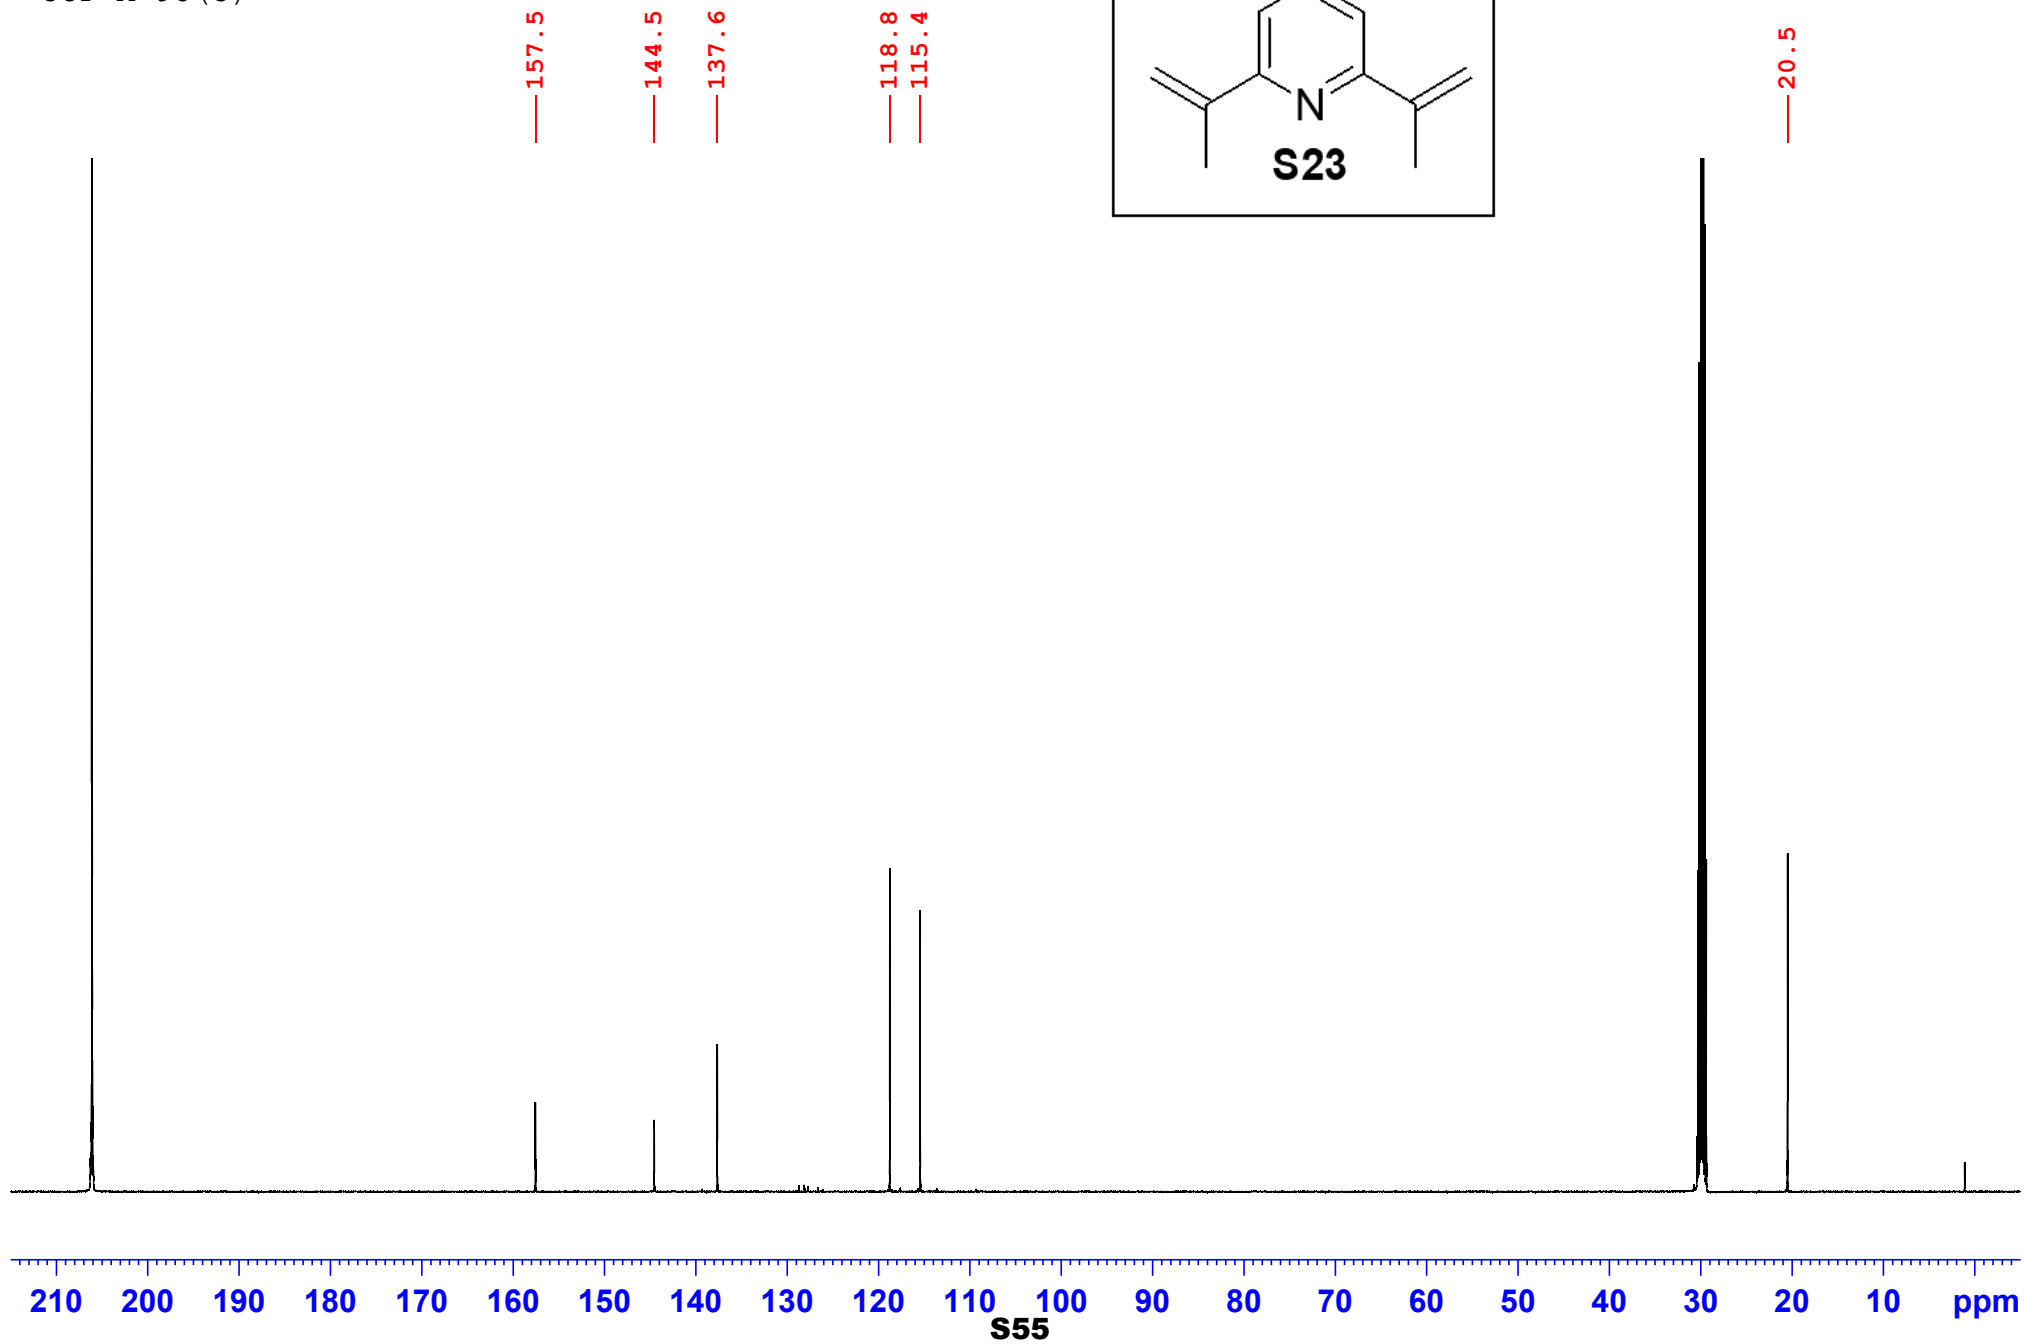

6-Isoprenyl-[2,2']bipyridinyl (S24)  
AMS-A-247(3)

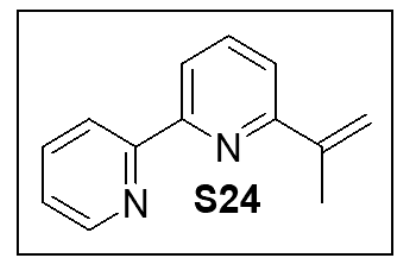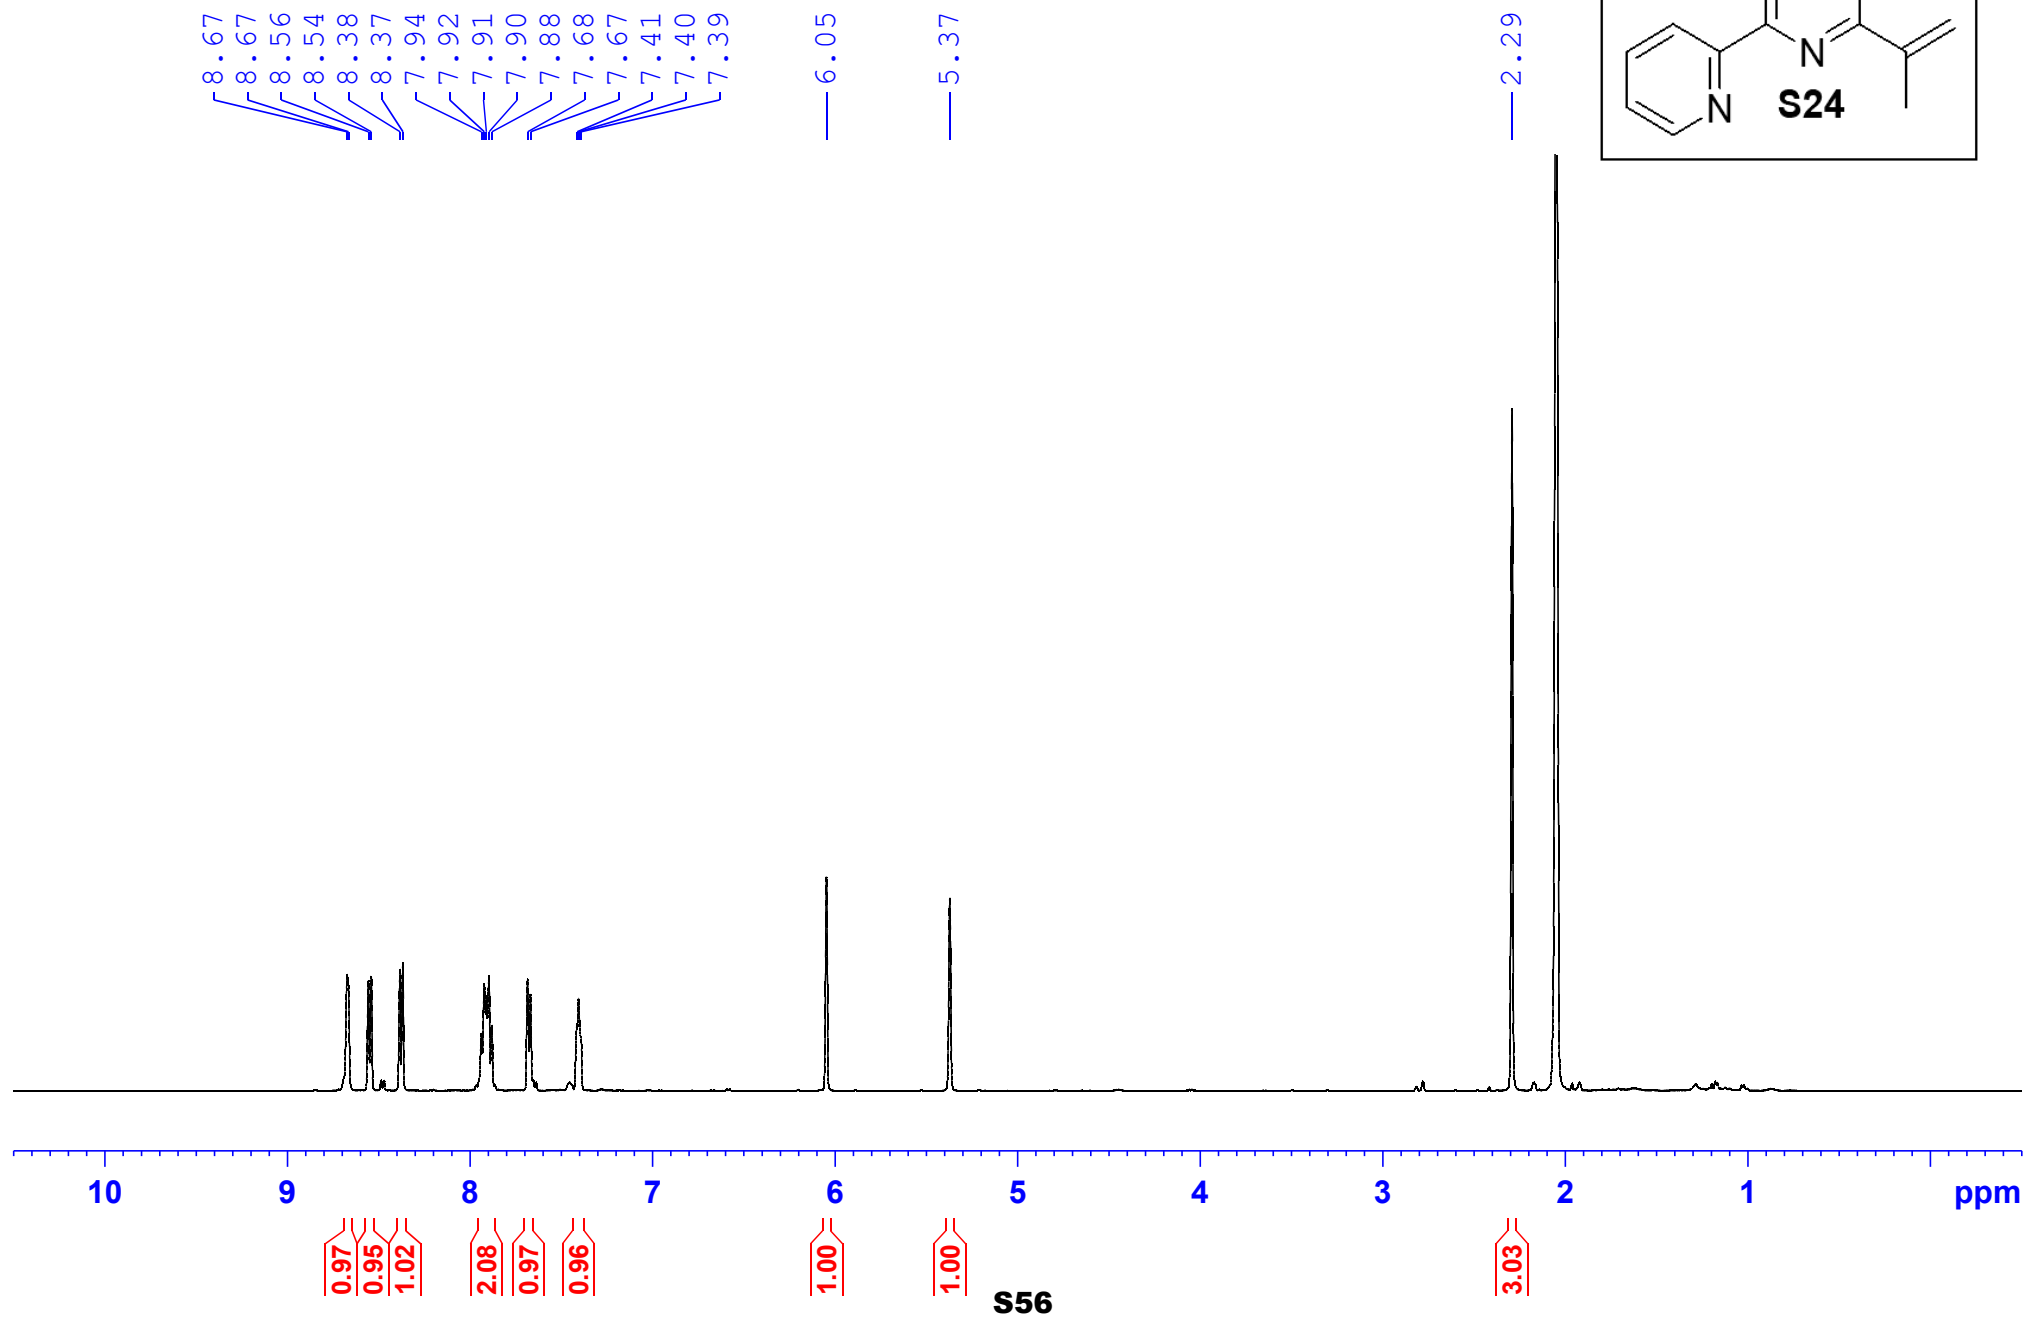



6-Isoprenyl-[2,2']bipyridinyl (S24)  
AMS-A-247(3)

158.0  
157.0  
155.8  
150.0  
144.3  
138.2  
137.7  
124.7  
121.5  
120.5  
119.9  
115.8

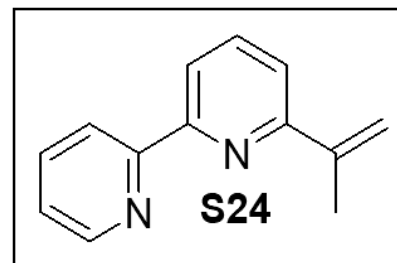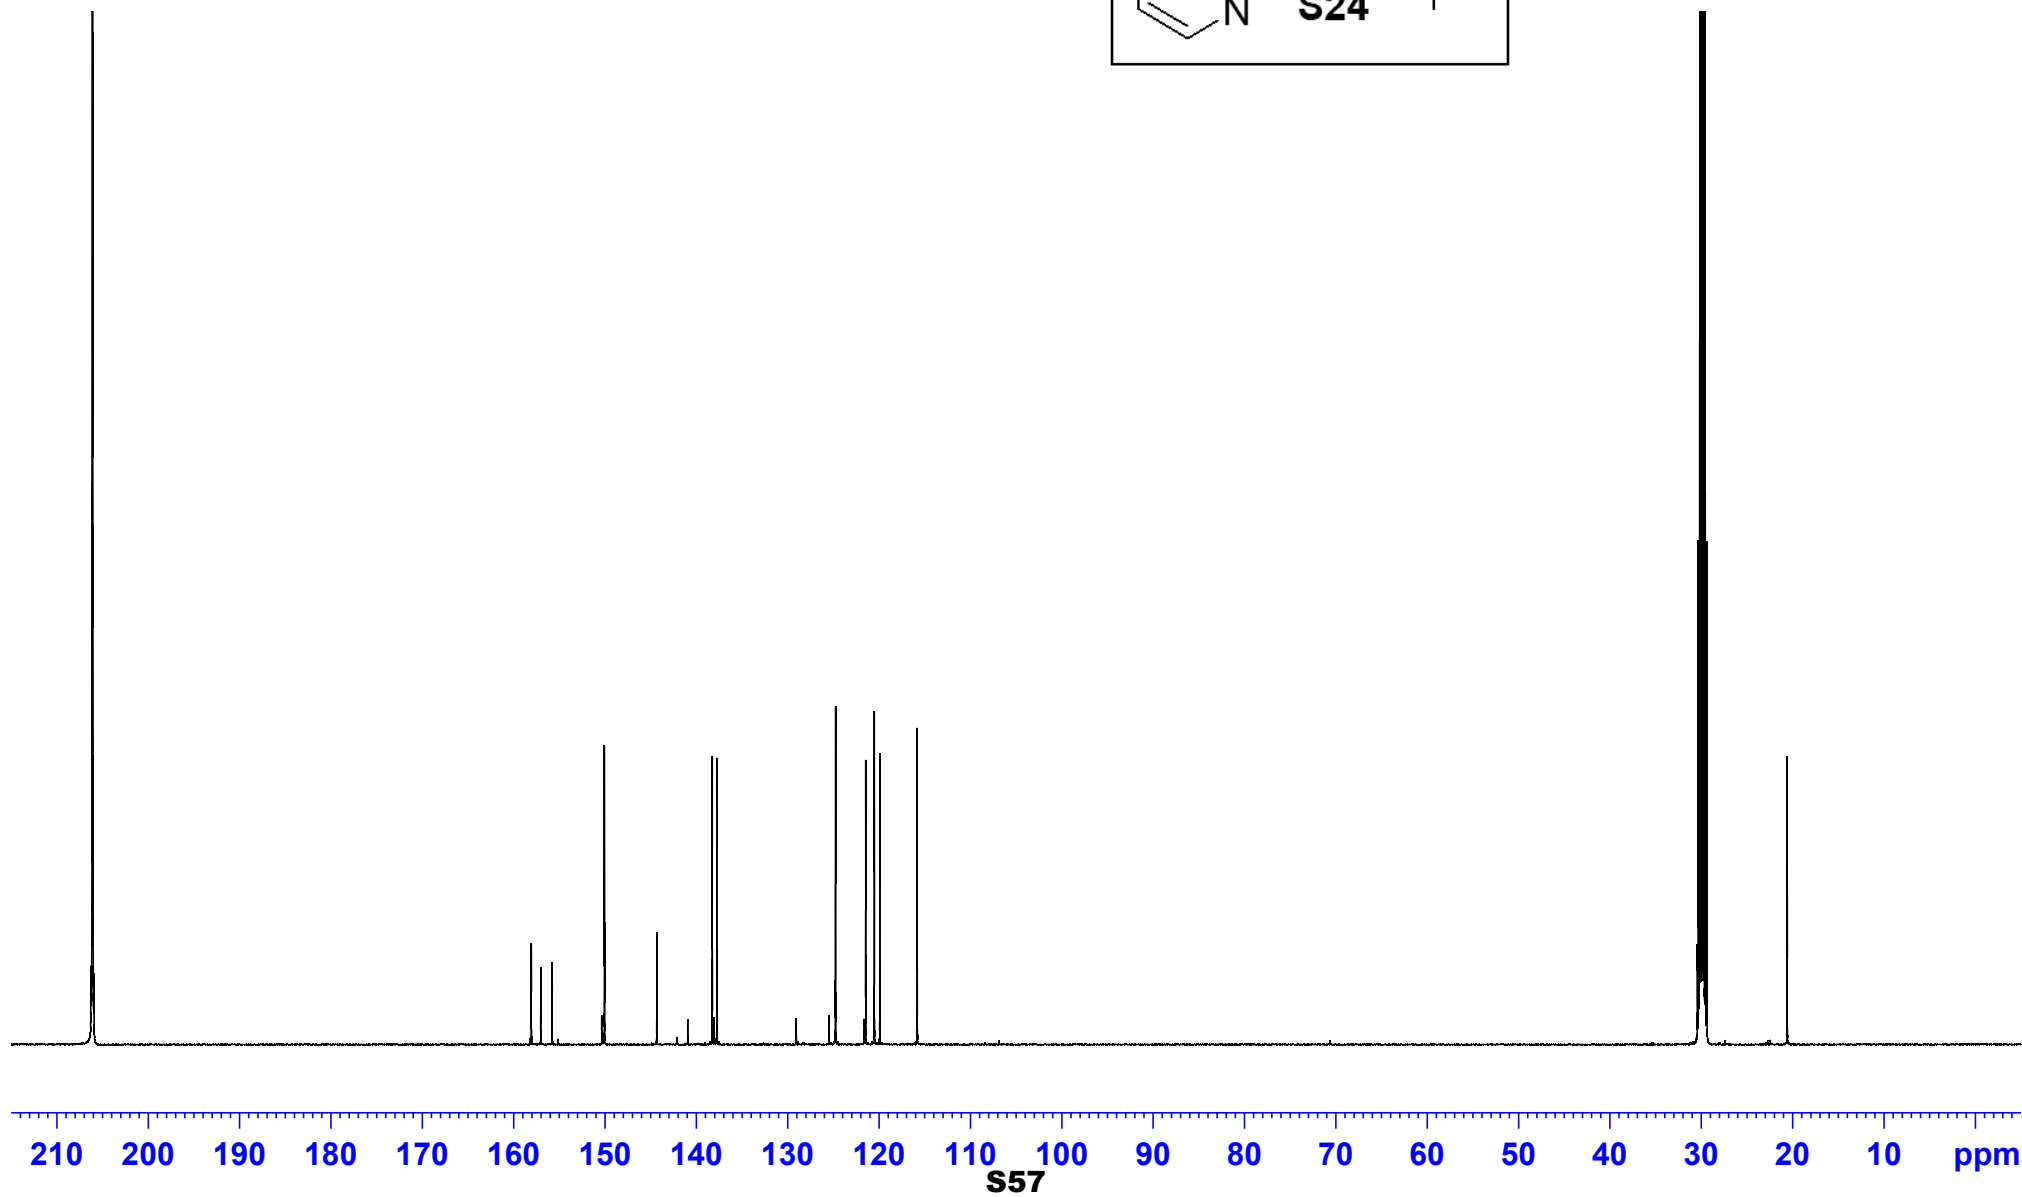

6,6'-Diisopropenyl-[2,2']bipyridine (S25)

8.44  
8.43  
8.42  
8.42  
7.80  
7.78  
7.76  
7.51  
7.51  
7.50  
7.50

6.01  
6.00

5.35  
5.35  
5.35

2.31  
2.31

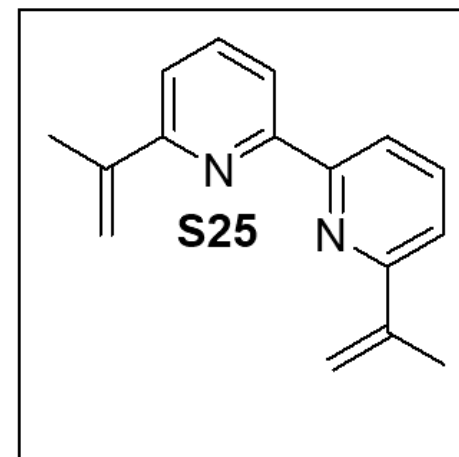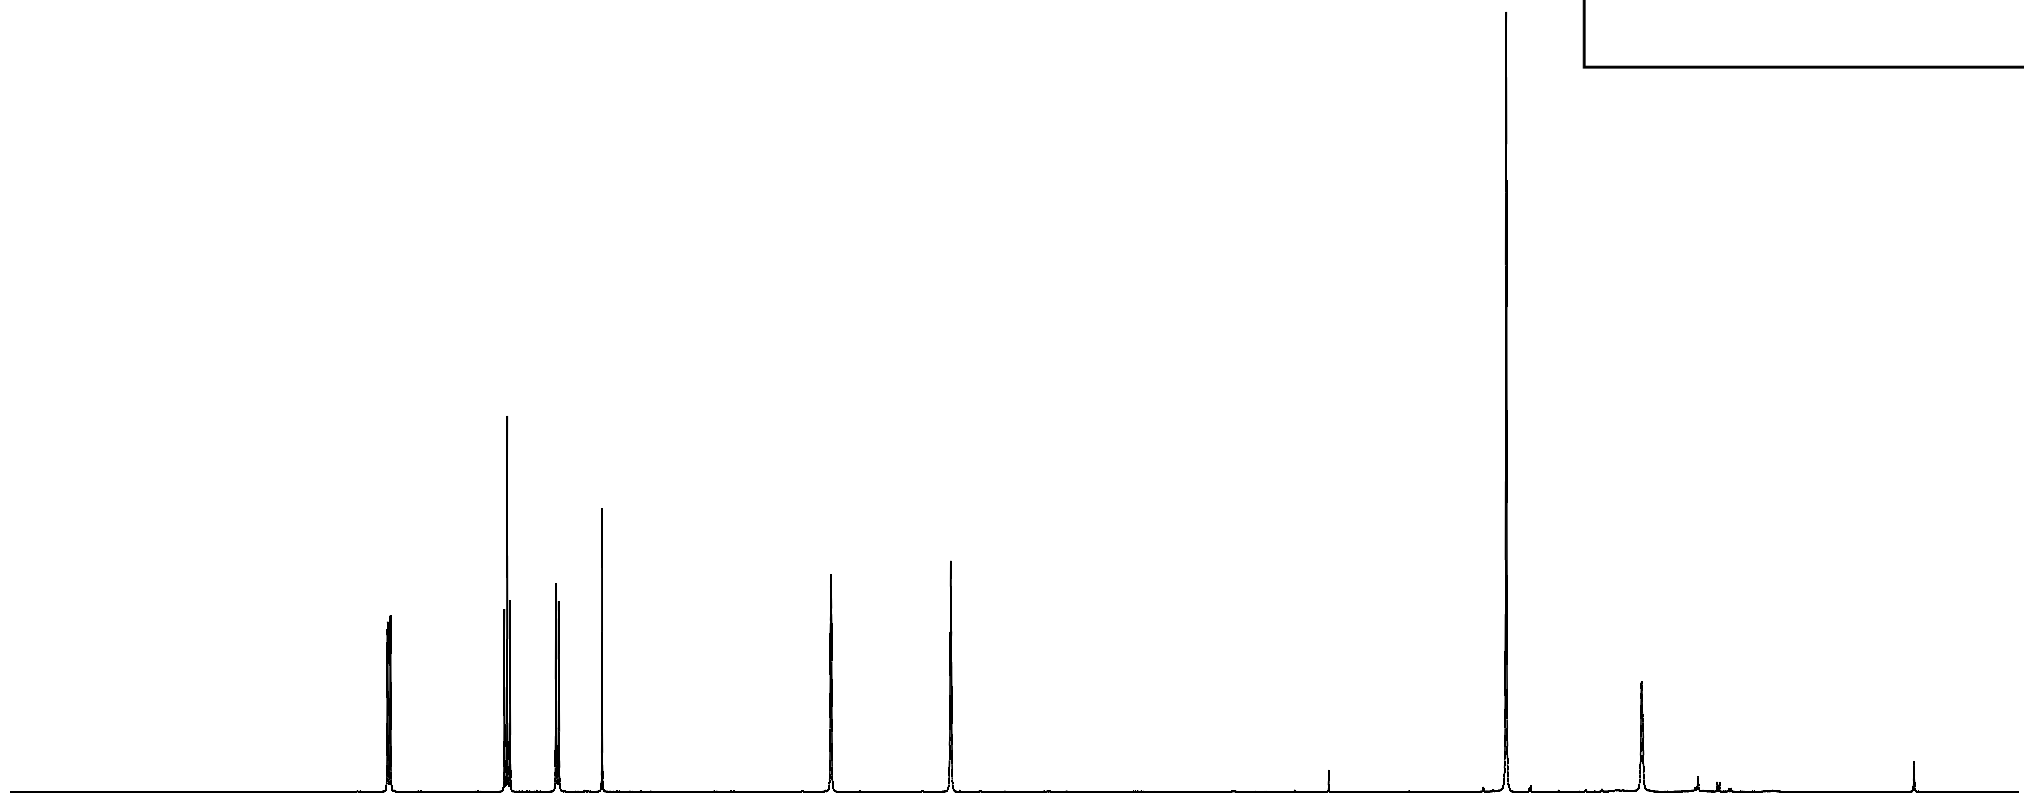

10

9

8

7

6

5

4

3

2

1

ppm

1.93

2.00

1.99

2.04

2.06

6.19

S58

6,6'-Diisopropenyl-[2,2']bipyridine (S25)

157.3  
155.3

143.6

137.2

119.6  
119.5  
115.5

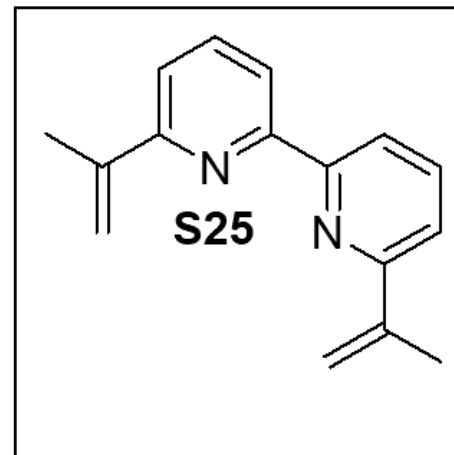

20.6

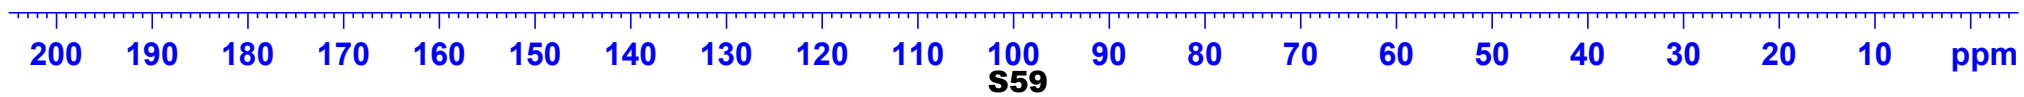

2,9-Diisoprenyl-[1,10]phenanthroline (S26)  
AMS-B-17(3)

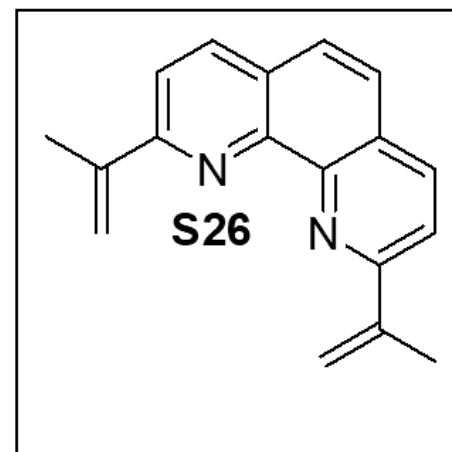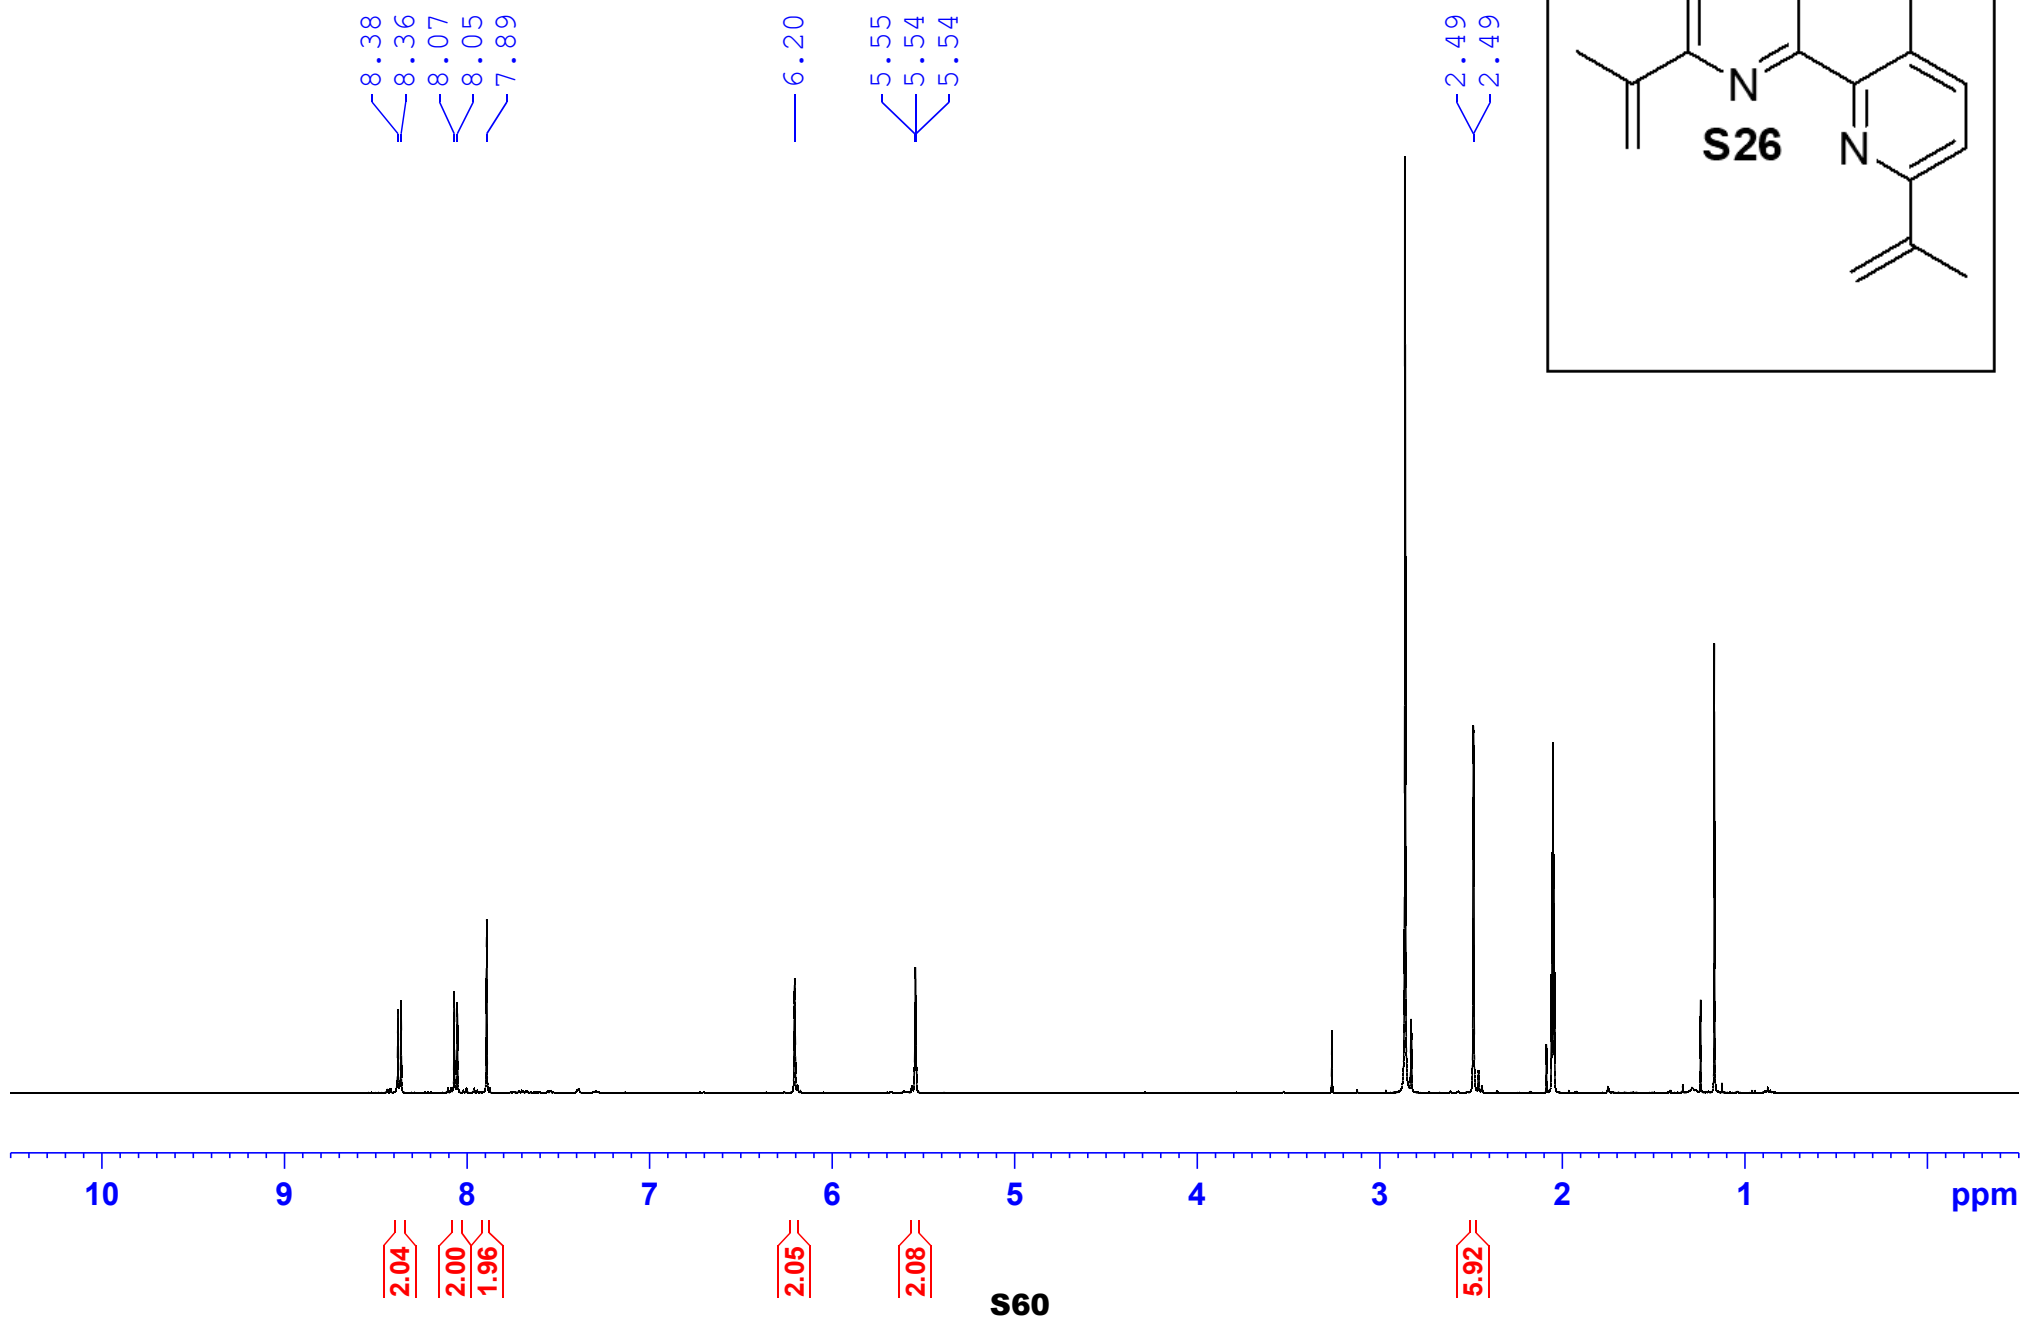

S60

2,9-Diisoprenyl-[1,10]phenanthroline (S26)  
AMS-B-17(5)

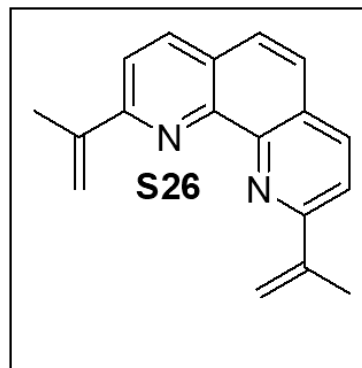

158.1  
146.3  
145.6  
137.0  
128.7  
126.9  
120.0  
116.8

20.6

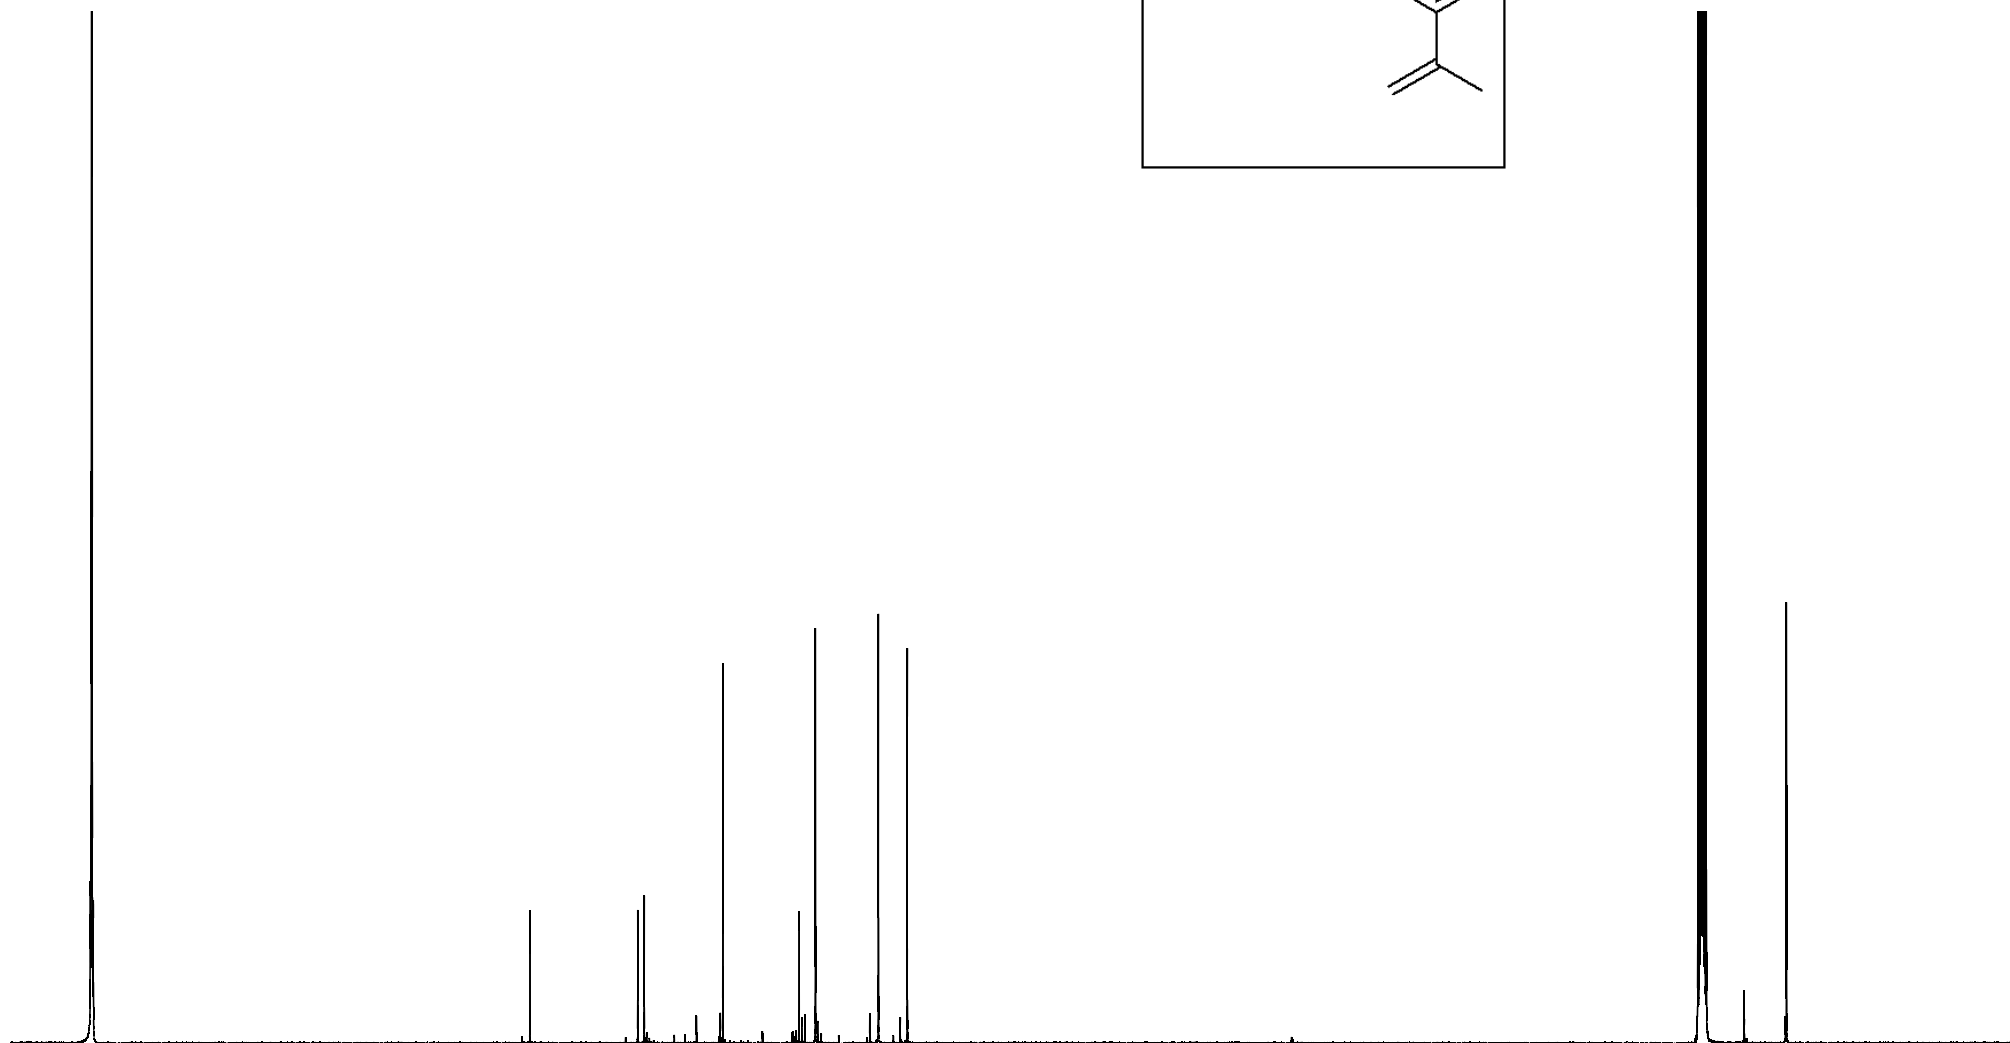

210 200 190 180 170 160 150 140 130 120 110 100 90 80 70 60 50 40 30 20 10 ppm

S61

2-Isopropenyl-6-[(triisopropylsilyl)-ethynyl]-pyridine (S31)  
AMS-A-117 (6)

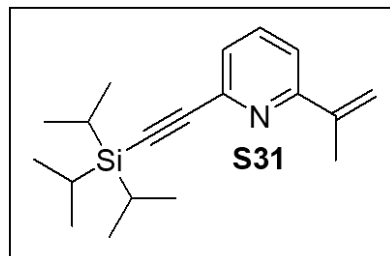

7.78  
7.77  
7.75  
7.62  
7.62  
7.60  
7.60  
7.45  
7.45  
7.43  
7.43

5.93  
5.93

5.33  
5.33  
5.33

2.18

1.19  
1.18  
1.17  
1.16  
1.15

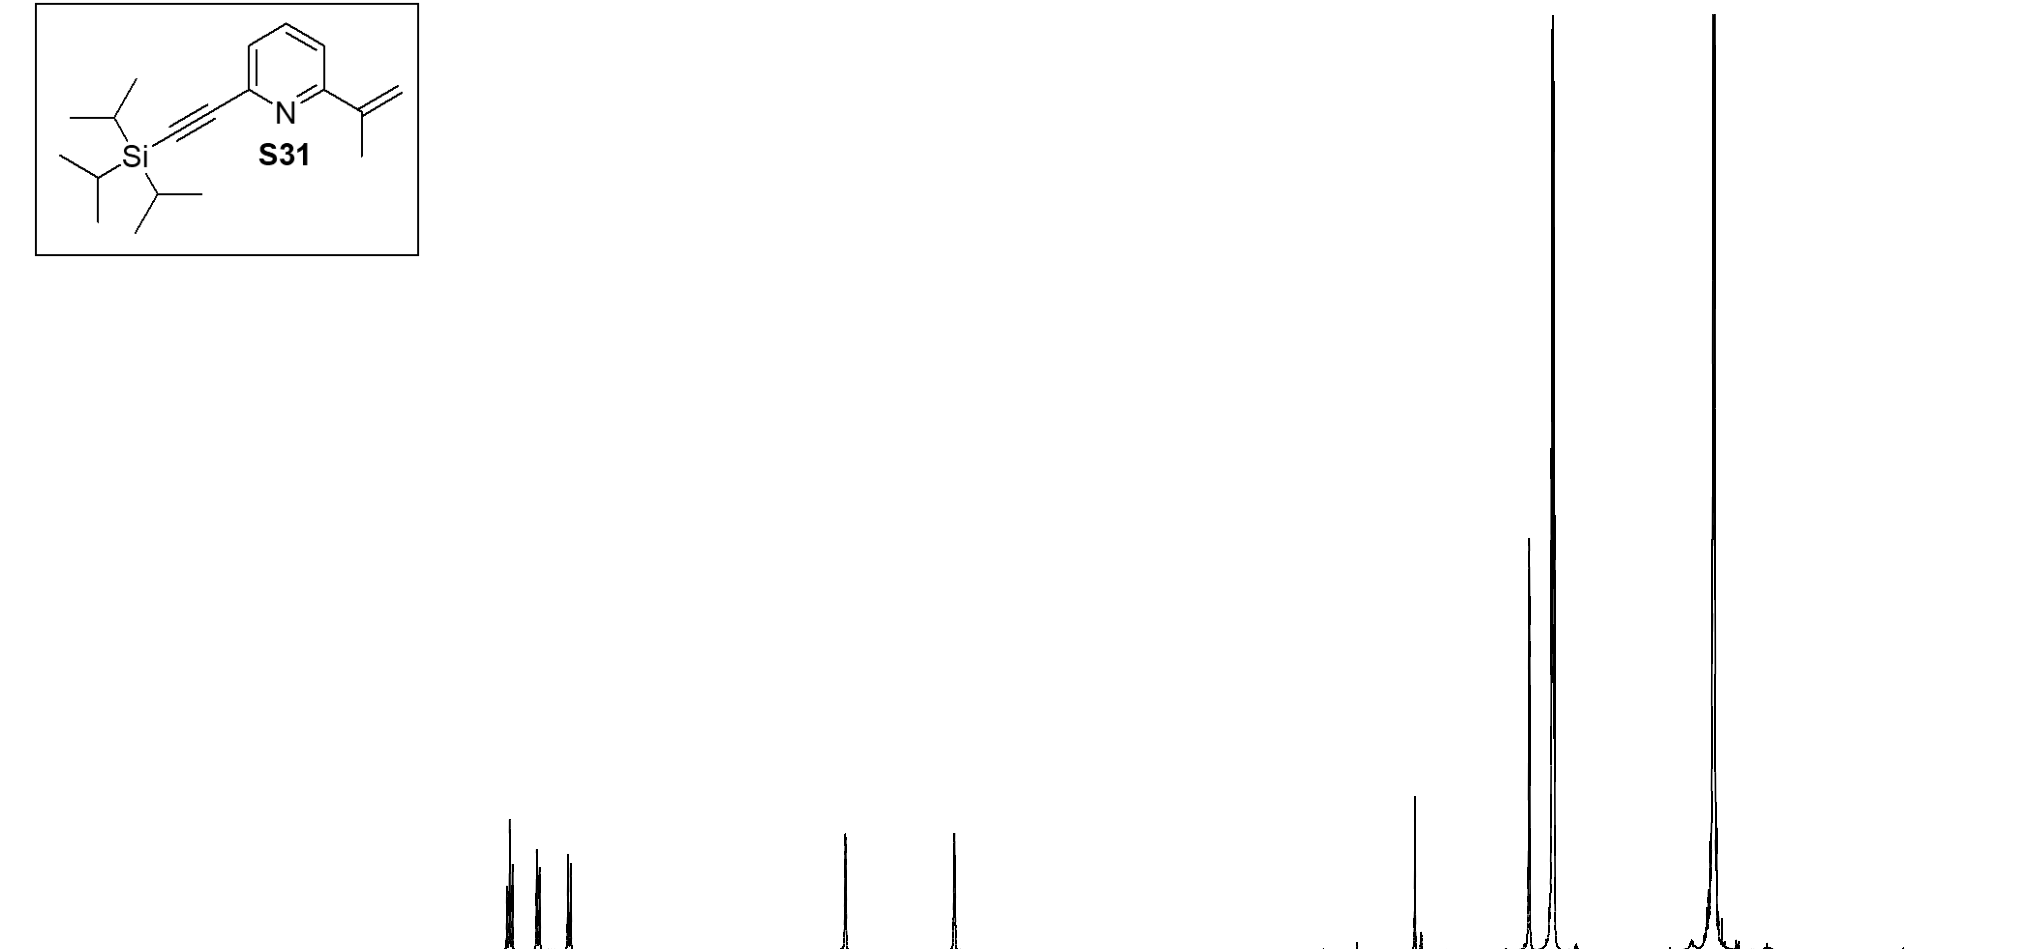

10 9 8 7 6 5 4 3 2 1 ppm

0.98  
0.96  
0.96

1.00

0.99

S62

3.13

22.30

2-Isopropenyl-6-[(triisopropylsilyl)-ethynyl]-pyridine (S31)  
AMS-A-117 (7)

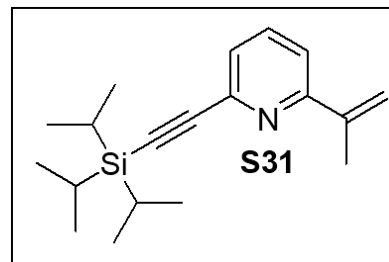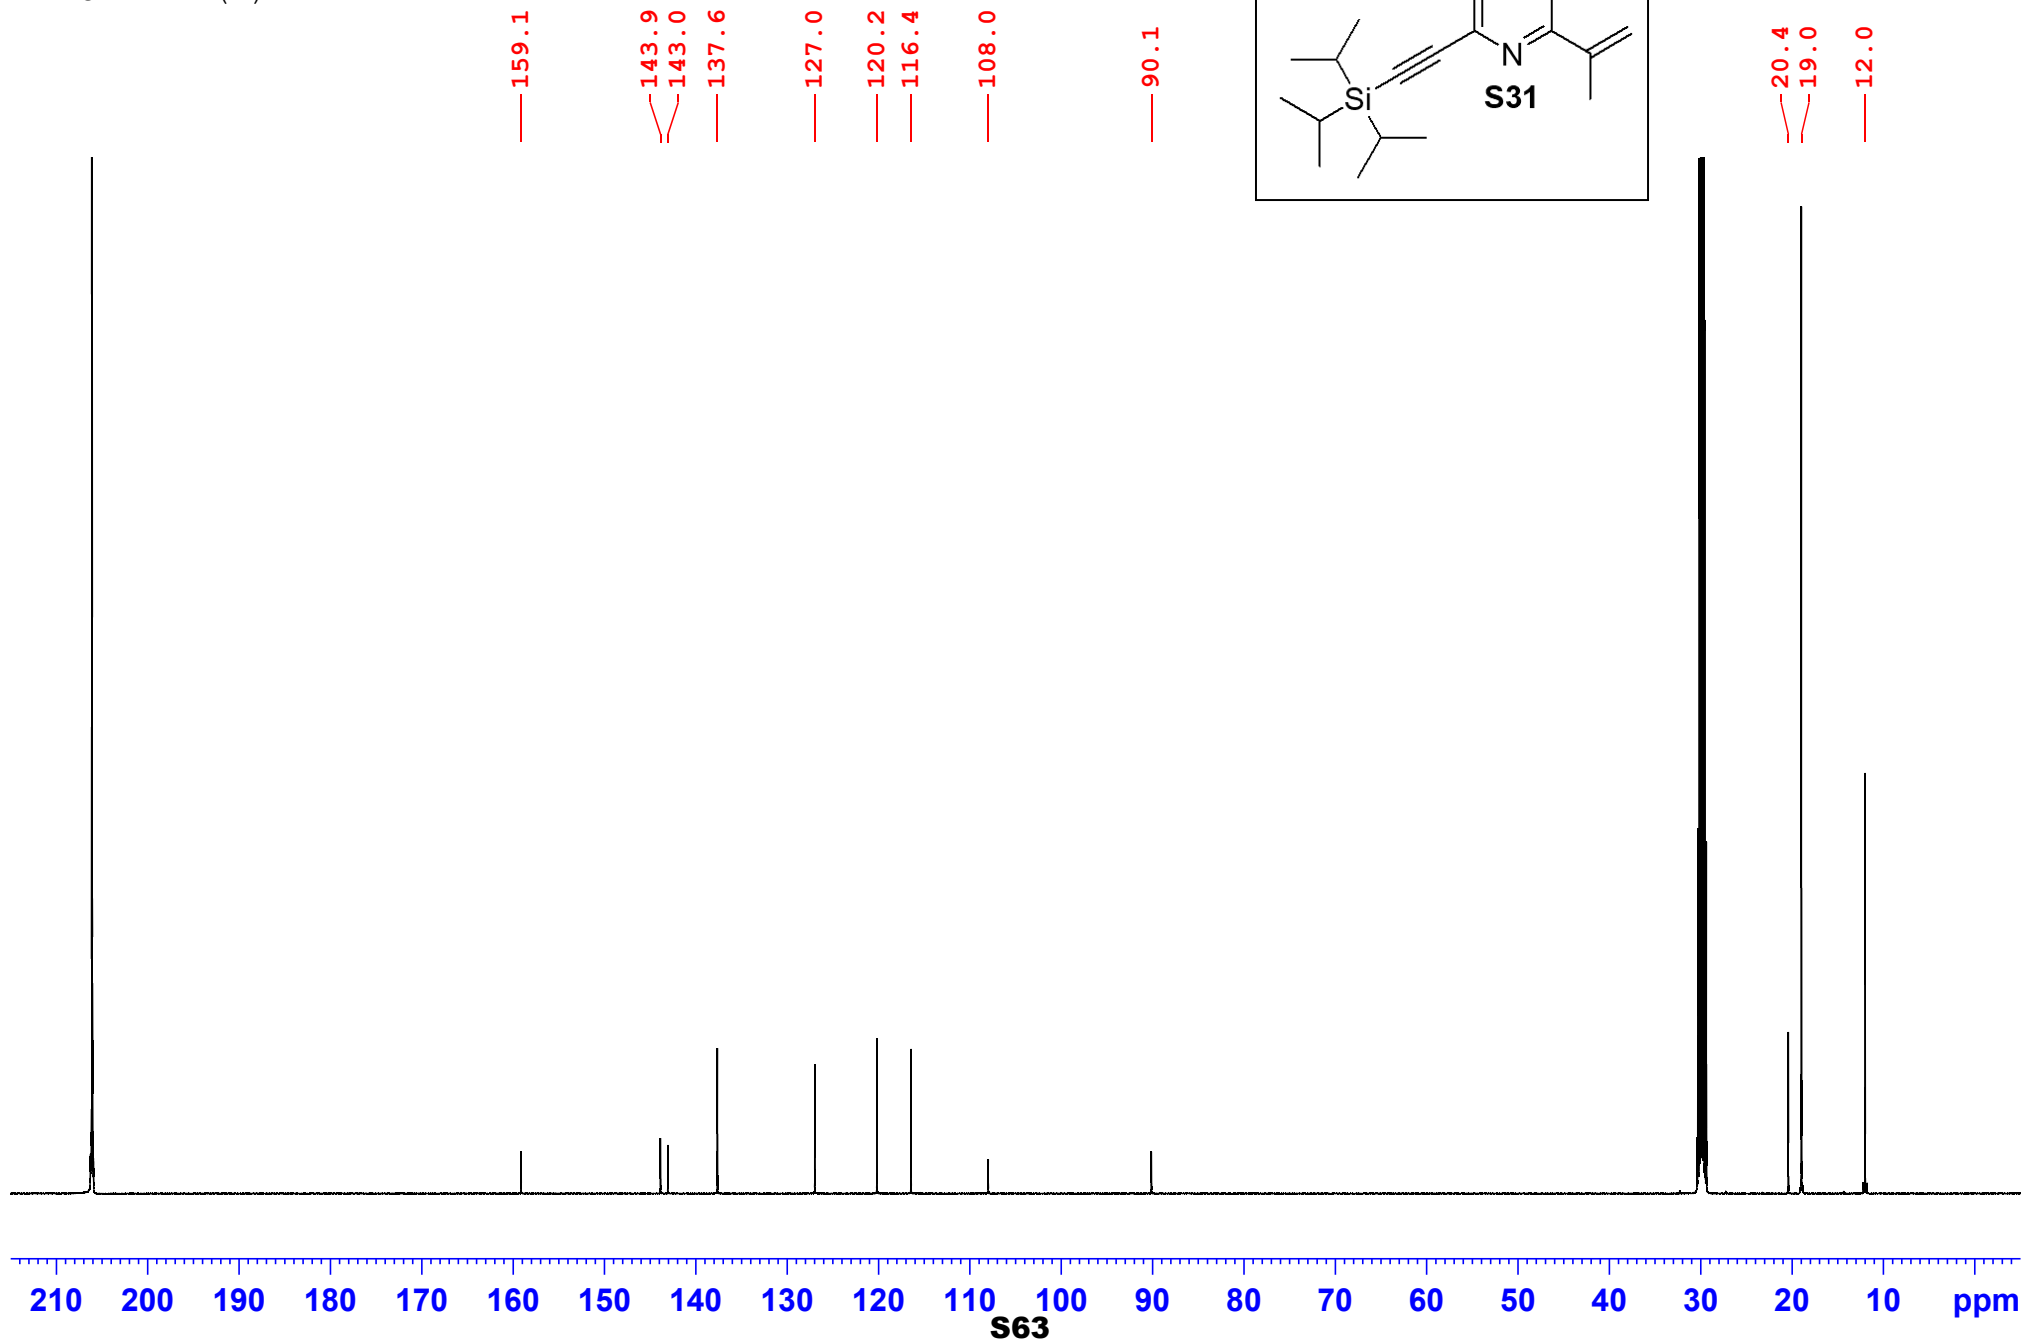

2-Isoprenyl-6-p-tolylethynyl-pyridine (S32)  
AMS-B-25 (2)

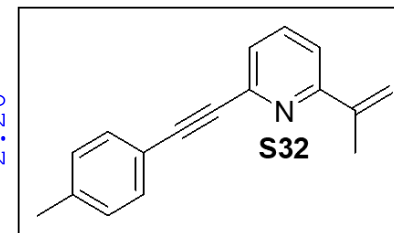

7.81  
7.79  
7.78  
7.62  
7.62  
7.61  
7.60  
7.51  
7.50  
7.49  
7.49  
7.49  
7.47  
7.47  
7.27  
7.26  
5.94  
5.94  
5.35  
5.35  
5.34  
5.34  
5.34  
5.34

2.37  
2.20  
2.20  
2.20

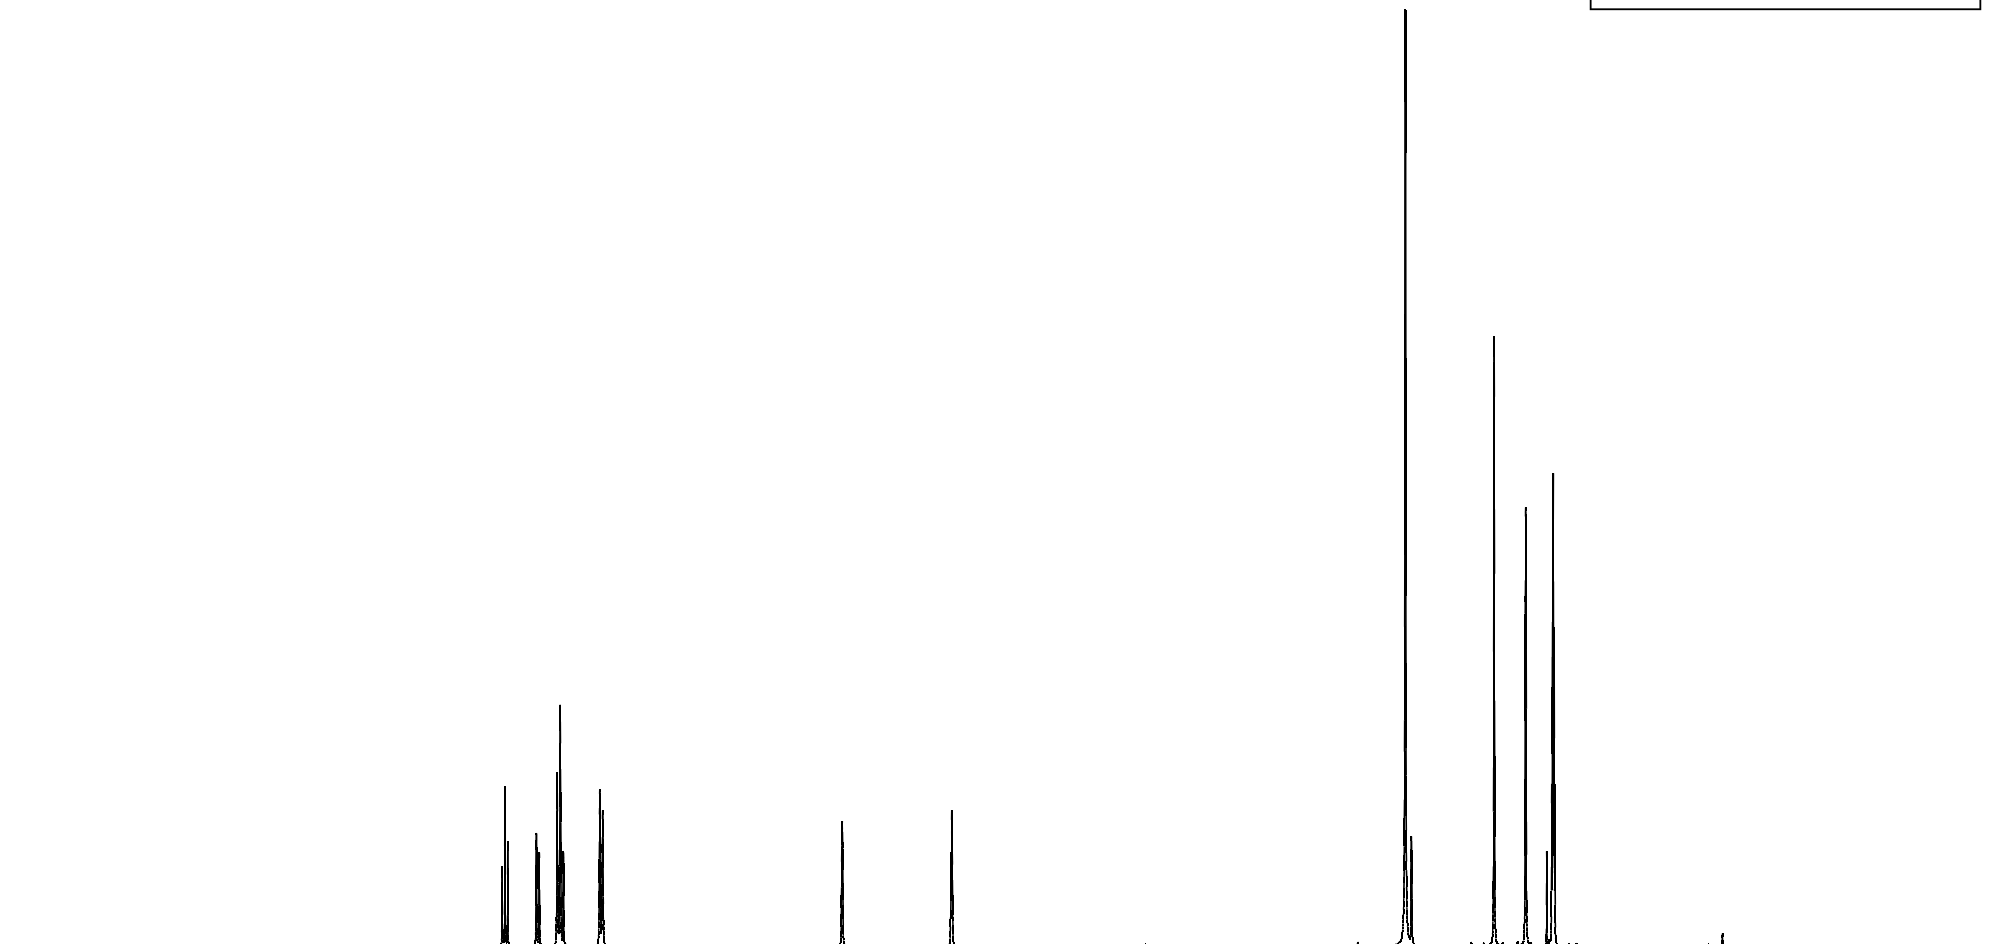

10 9 8 7 6 5 4 3 2 1 ppm

0.98  
0.95  
2.86  
1.94

0.99  
1.00

3.02  
3.01

S64



2-Isoprenyl-6-p-tolylethynyl-pyridine (S32)  
AMS-B-25 (2)

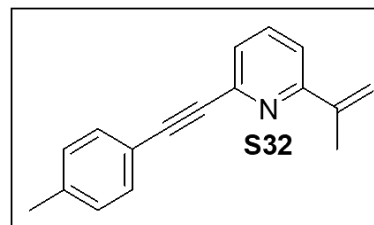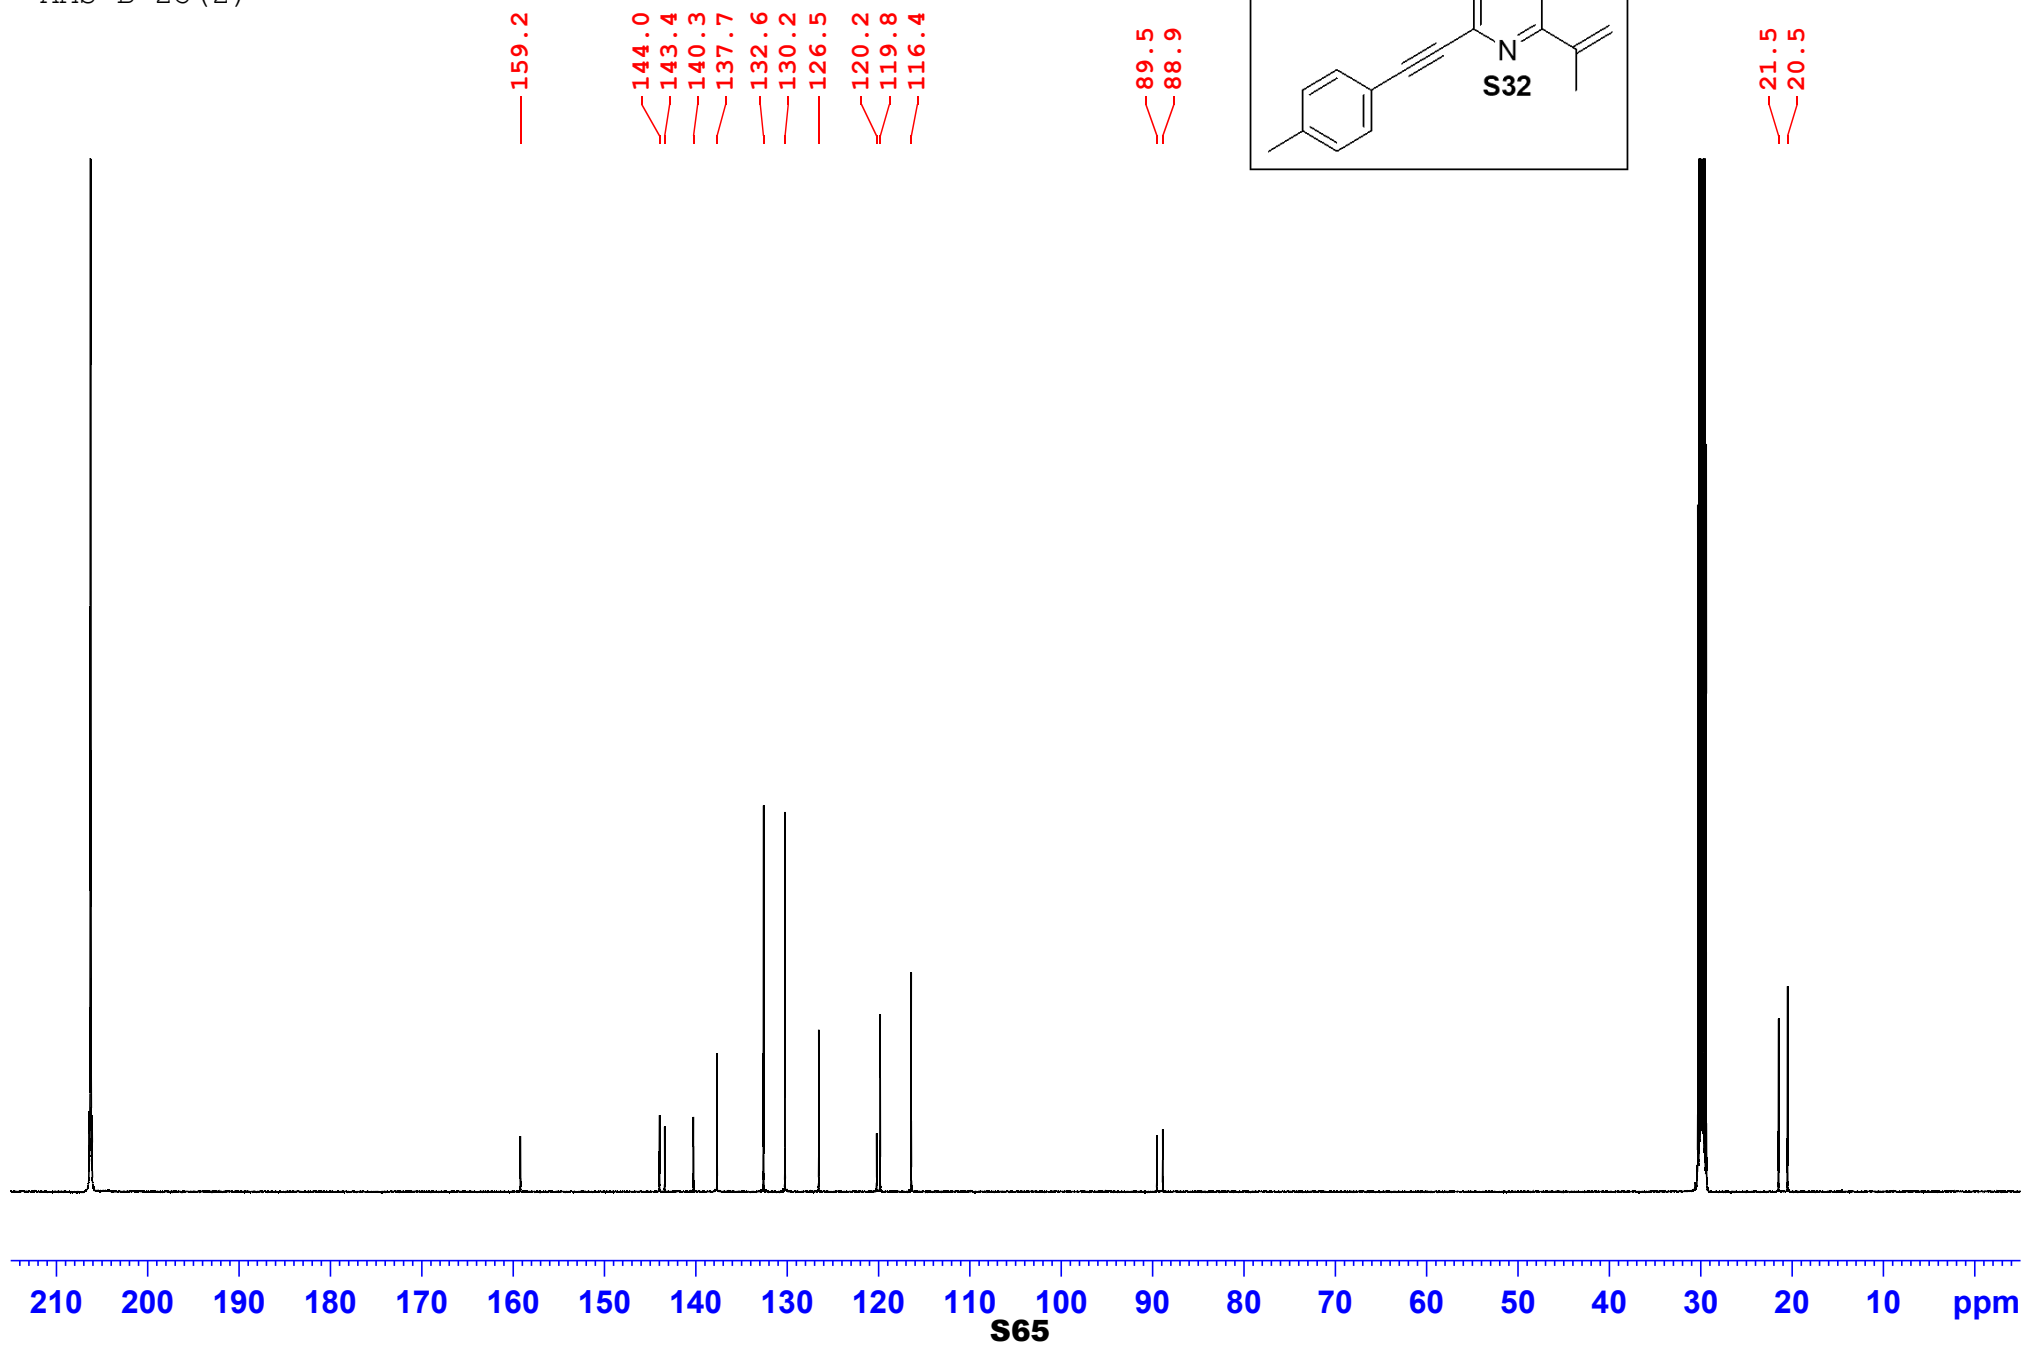

1-[6-(5,6-Diphenyl-[1,2,4]triazin-3-yl)-pyridin-2-yl]-ethanone (2)  
ZZG-F-279 (4)

8.85  
8.83  
8.24  
8.23  
8.10  
8.09  
8.07  
7.74  
7.72  
7.68  
7.67  
7.48  
7.47  
7.46  
7.43  
7.42  
7.40  
7.38

2.93

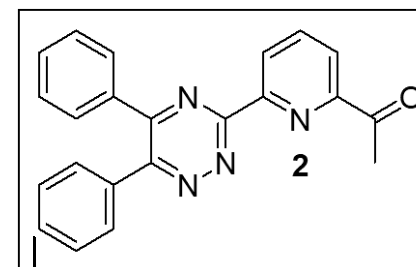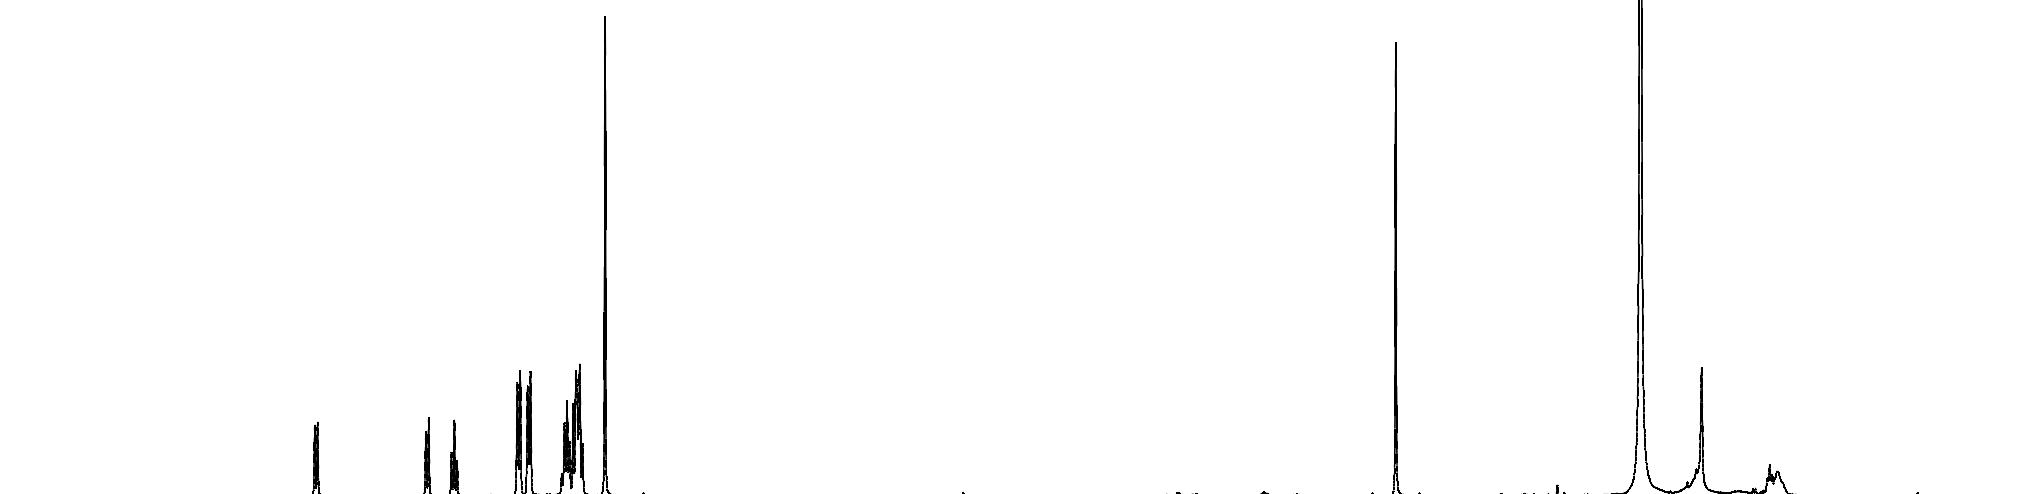

10 9 8 7 6 5 4 3 2 1 ppm

1.00  
0.99  
1.03  
2.00  
2.00  
2.07  
4.19

3.07

1-[6-(5,6-Diphenyl-[1,2,4]triazin-3-yl)-pyridin-2-yl]-ethanone (2)  
ZZG-F-279 (3)

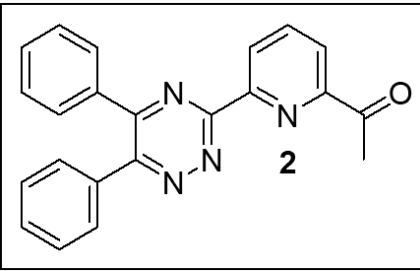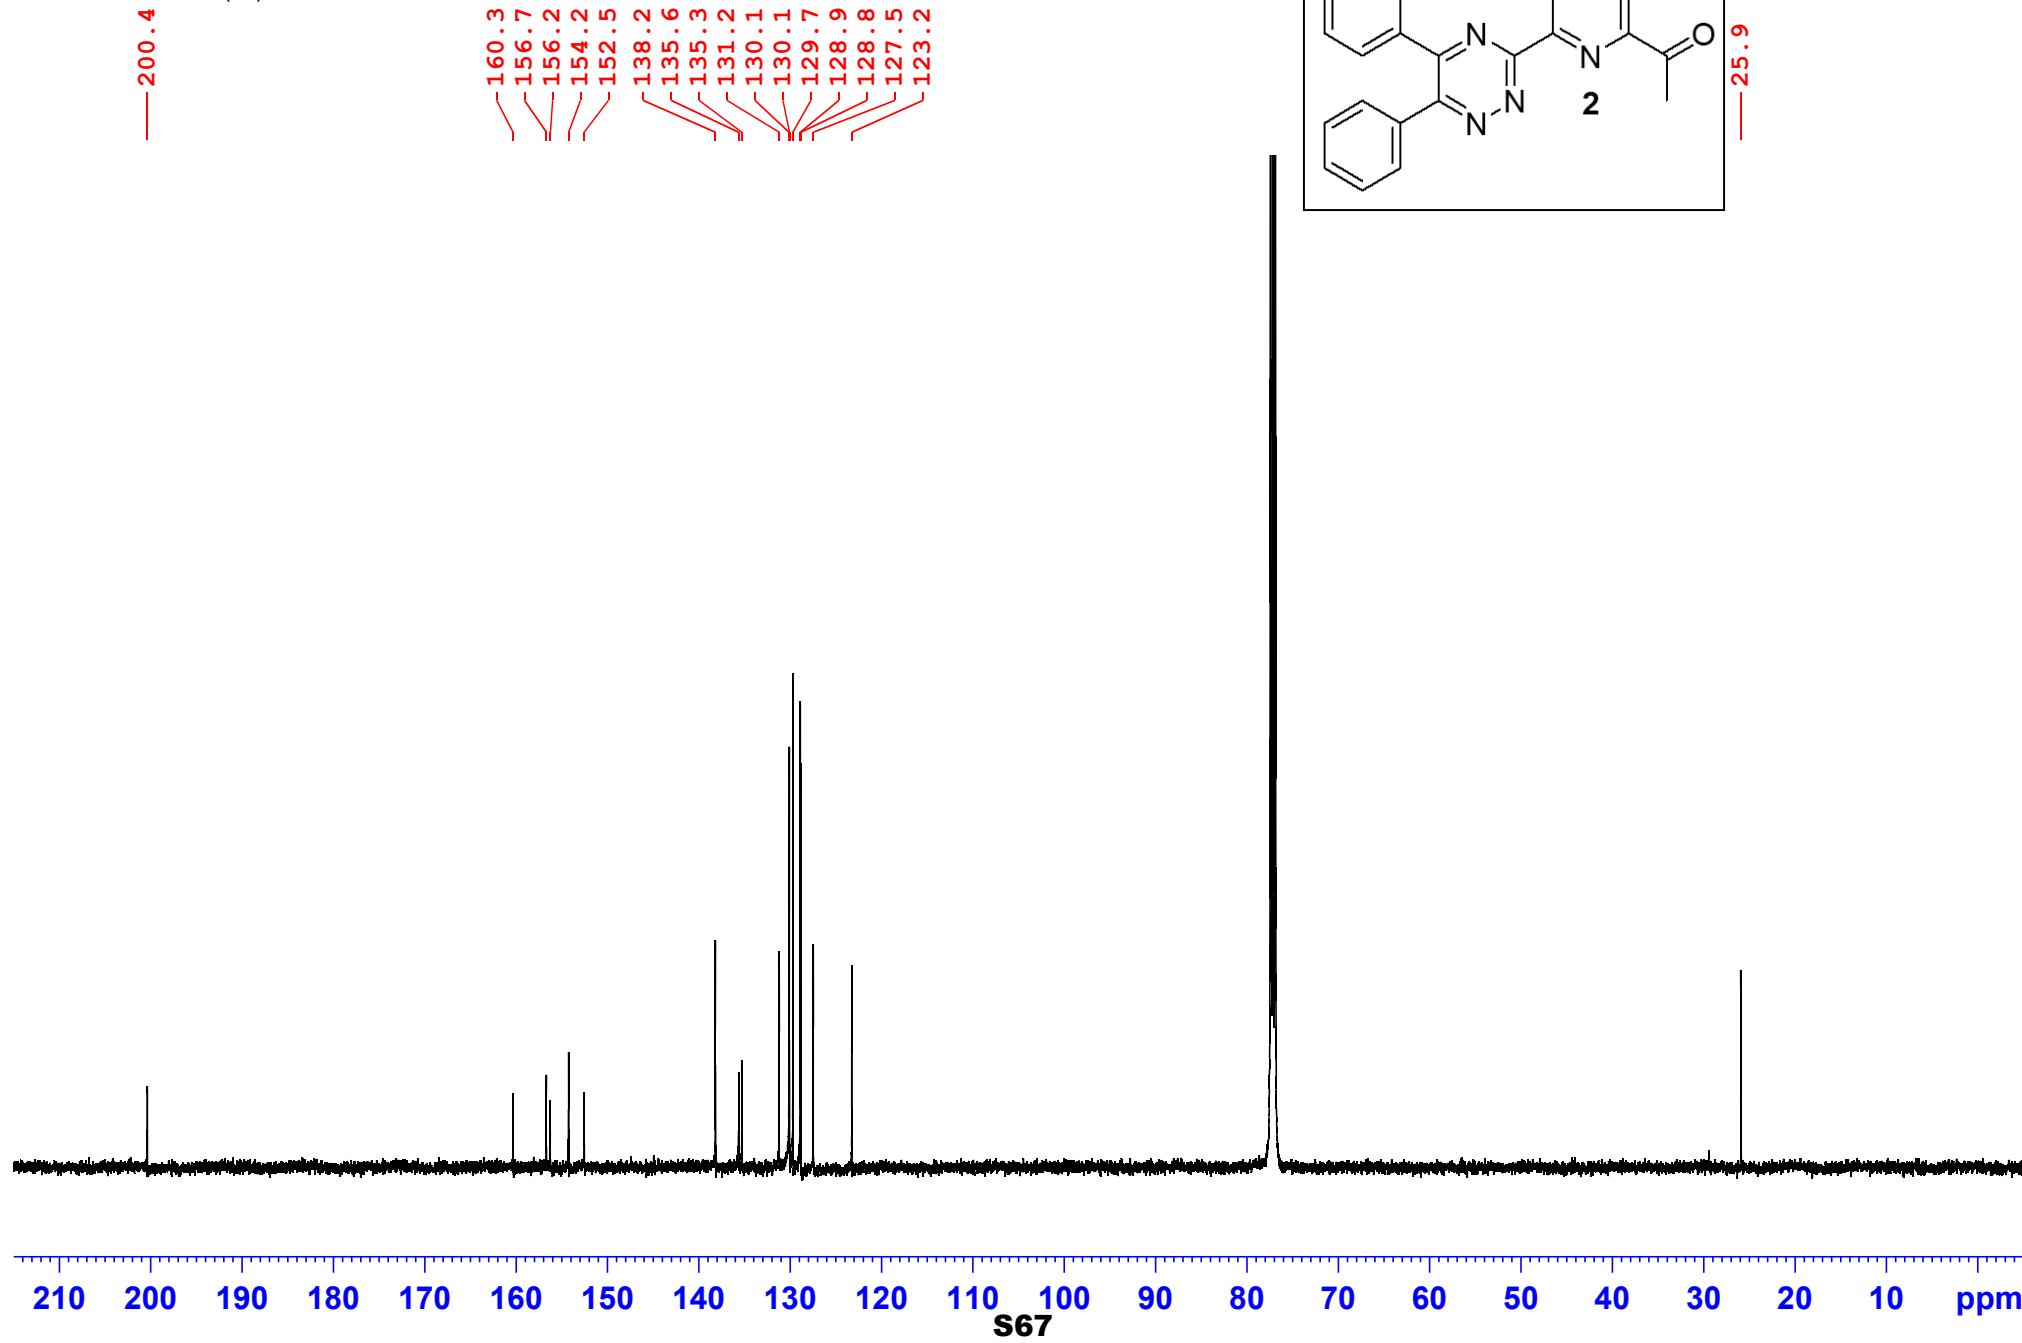

1-[6-(5,6-Di-p-tolyl-[1,2,4]triazin-3-yl)-pyridin-2-yl]-ethanone (10)  
ZZG-J-29(4)

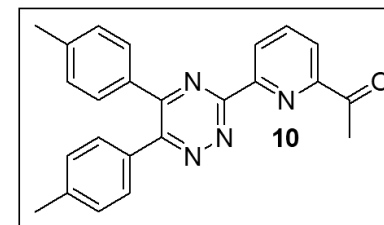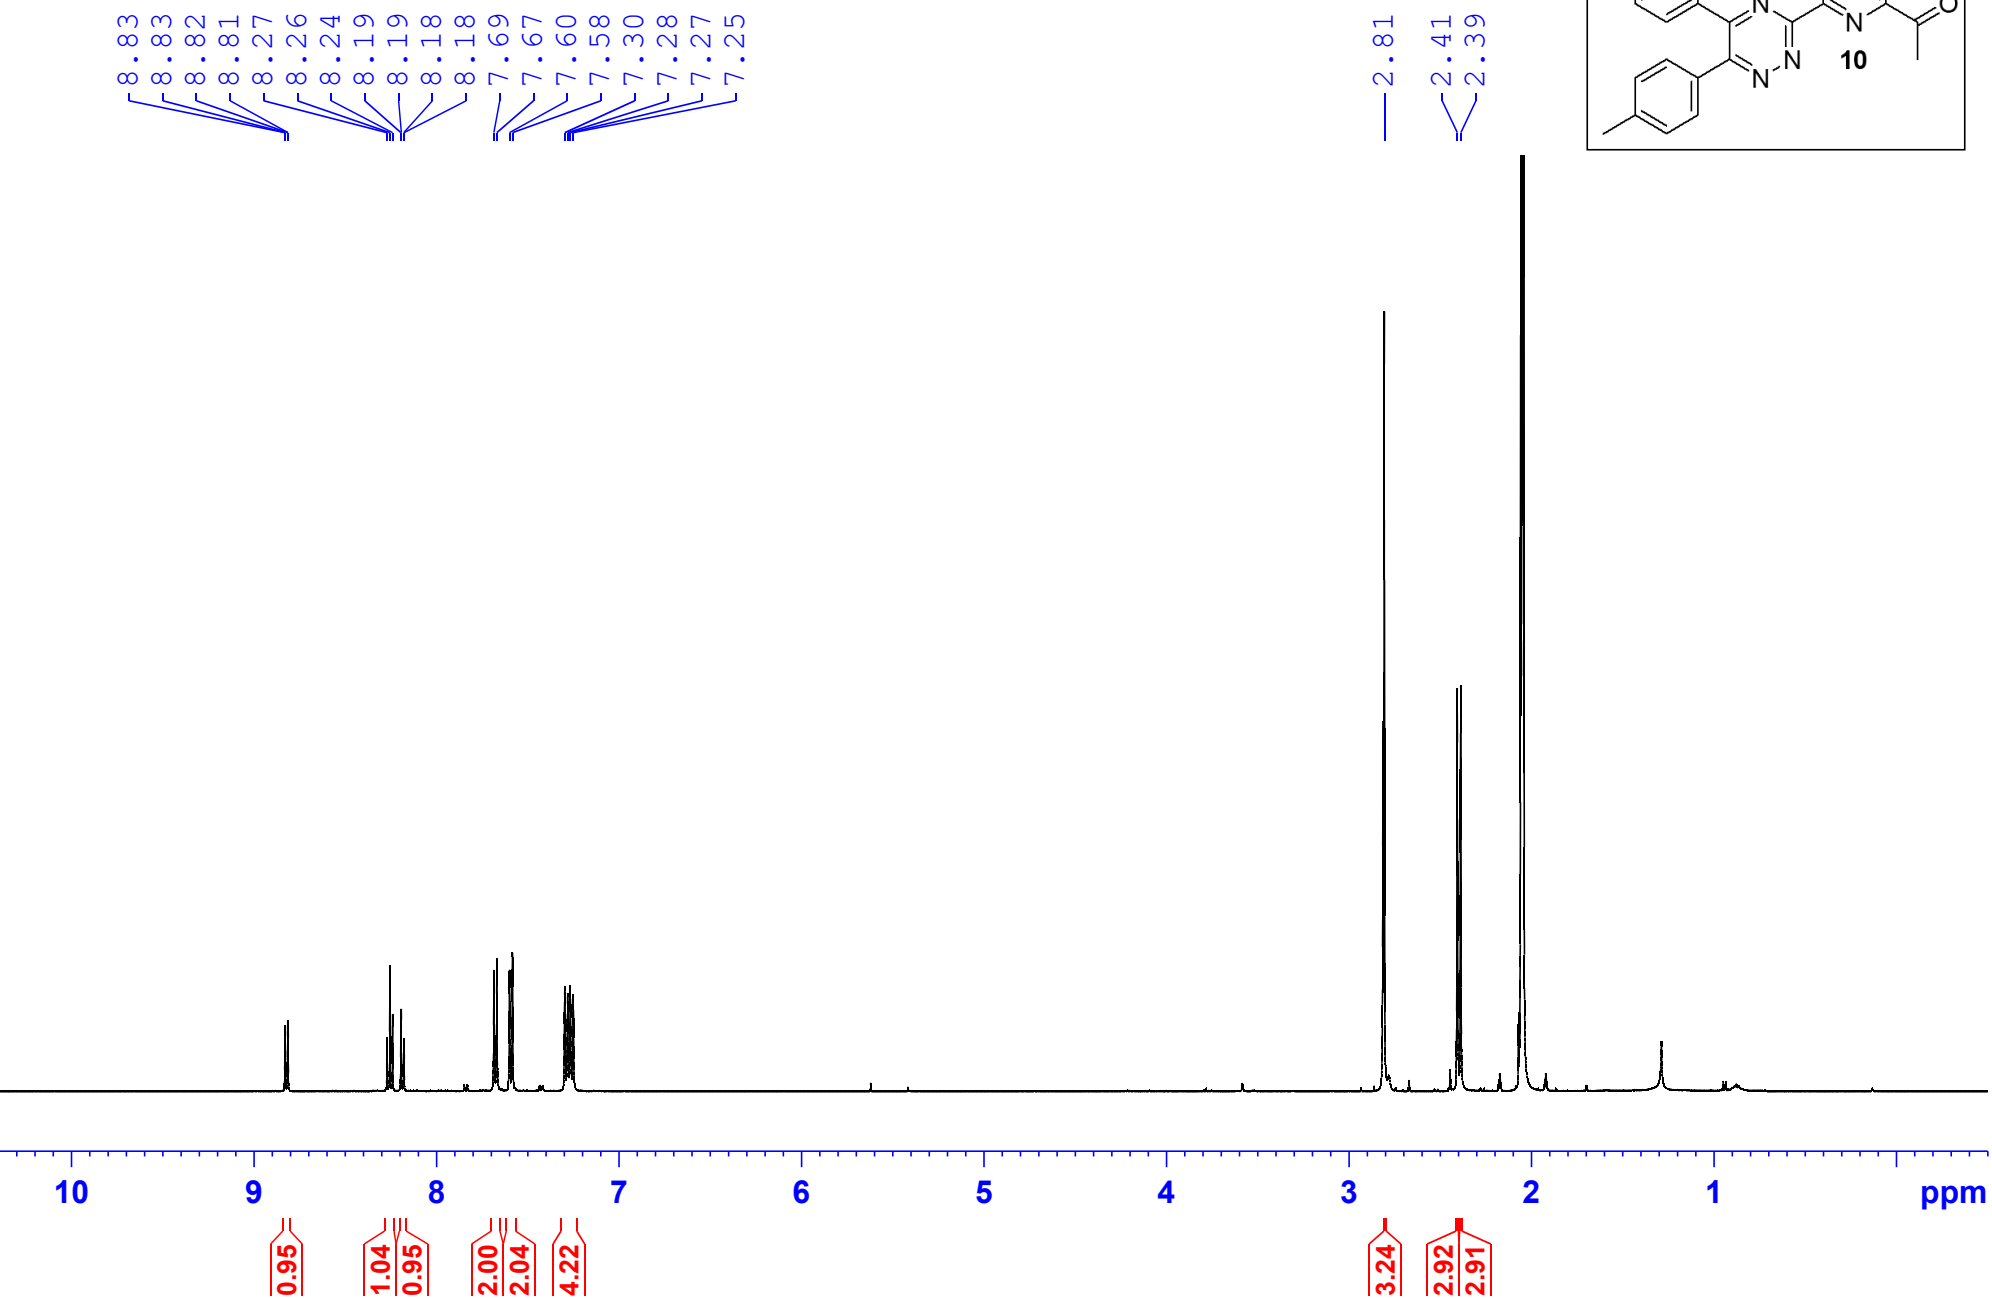

1-[6-(5,6-Di-p-tolyl-[1,2,4]triazin-3-yl)-pyridin-2-yl]-ethanone (10)  
ZZG-J-29 (5)

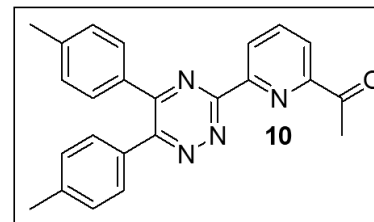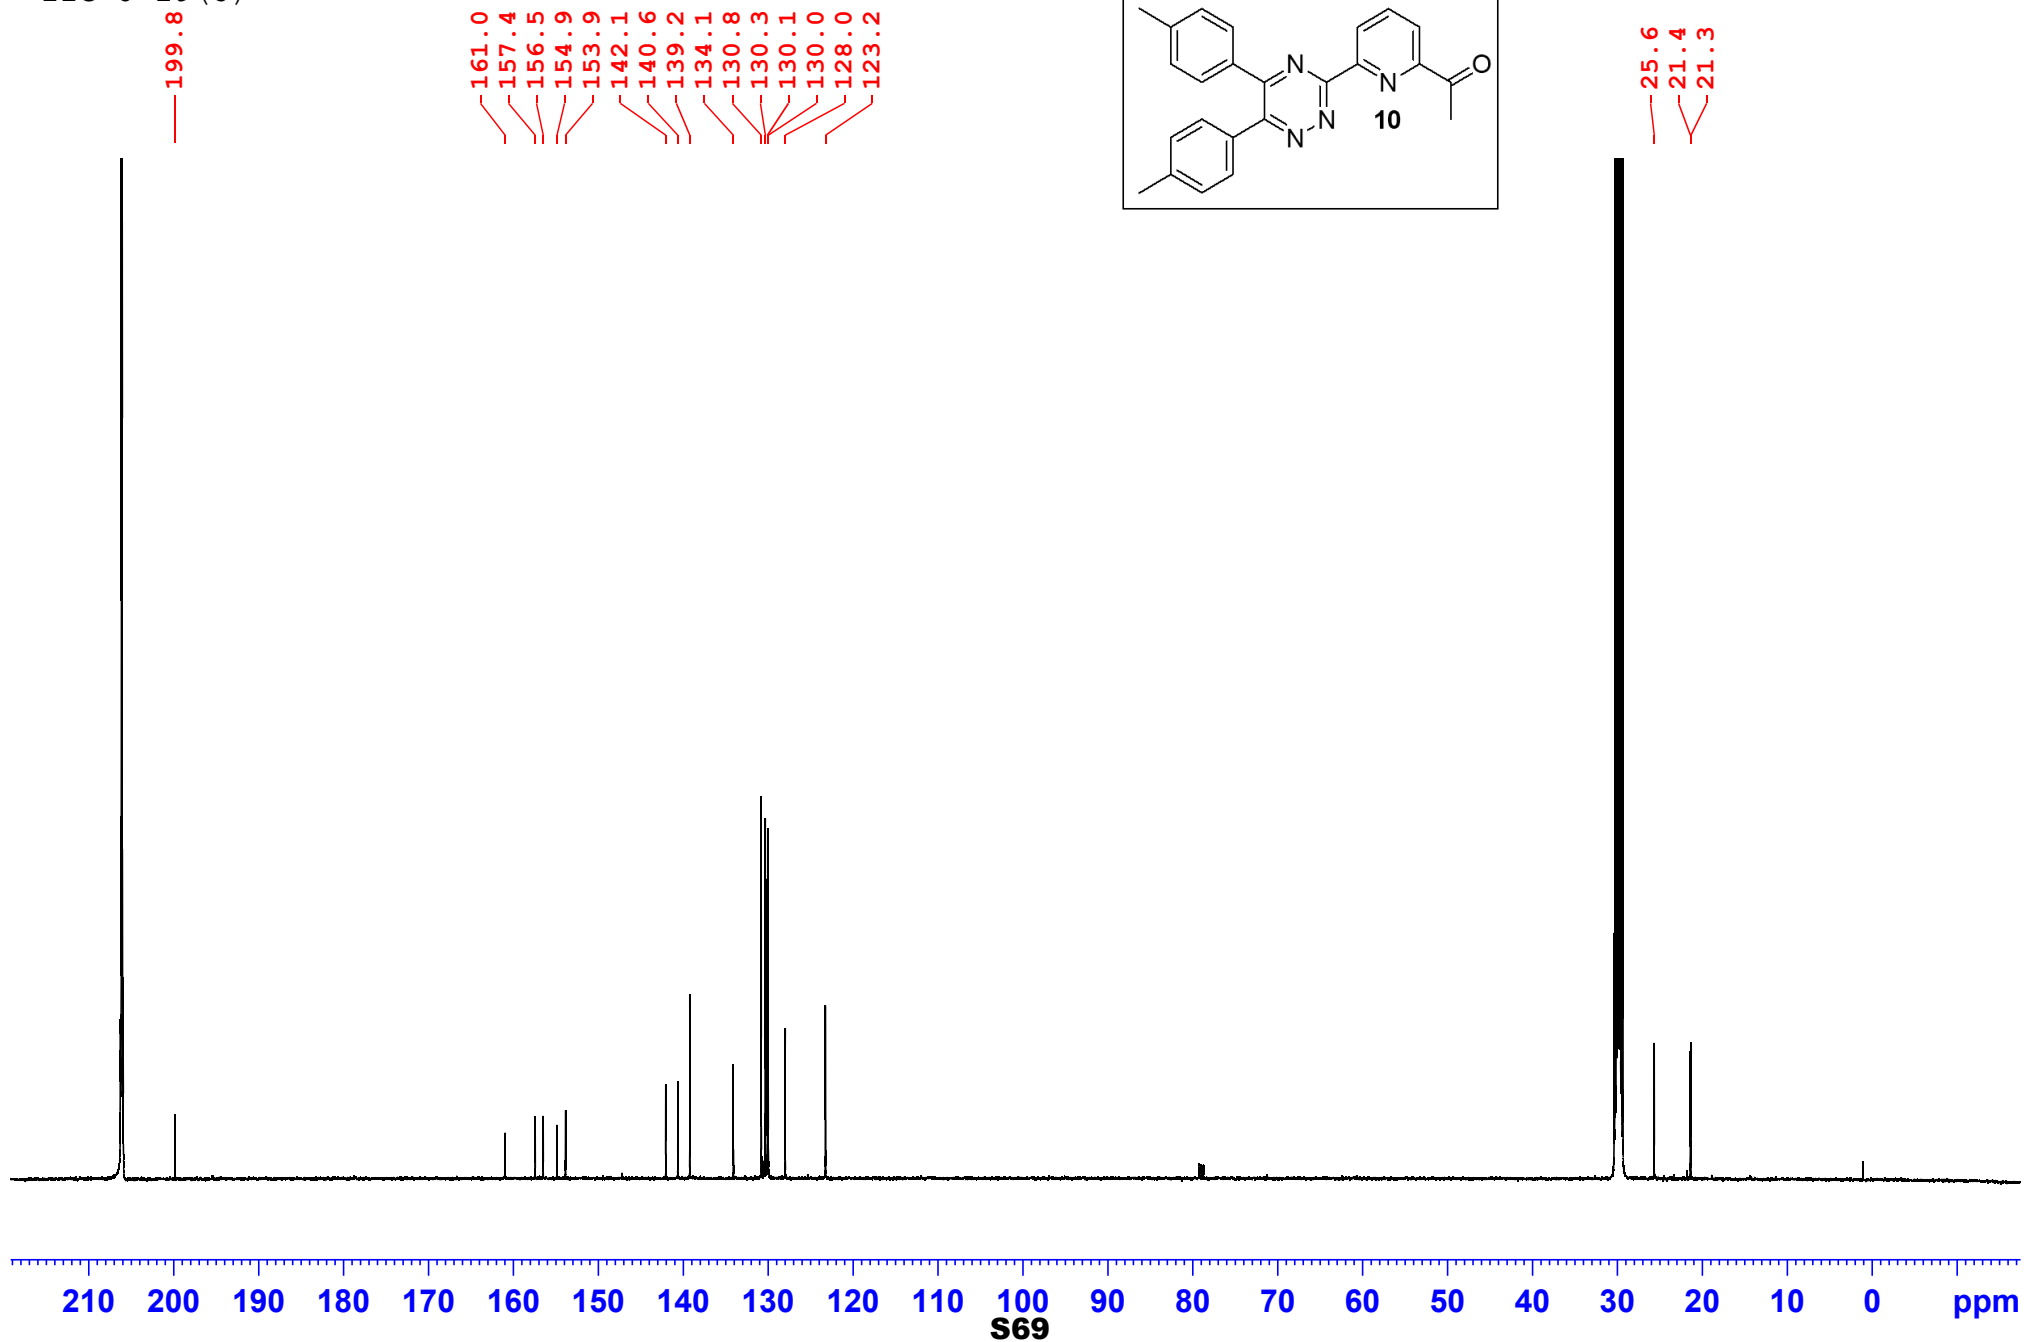

1-{6-[5,6-Bis-(4-butyl-phenyl)-[1,2,4]triazin-3-yl]-pyridin-2-yl}-ethanone (11)  
ZZG-J-31 (4)

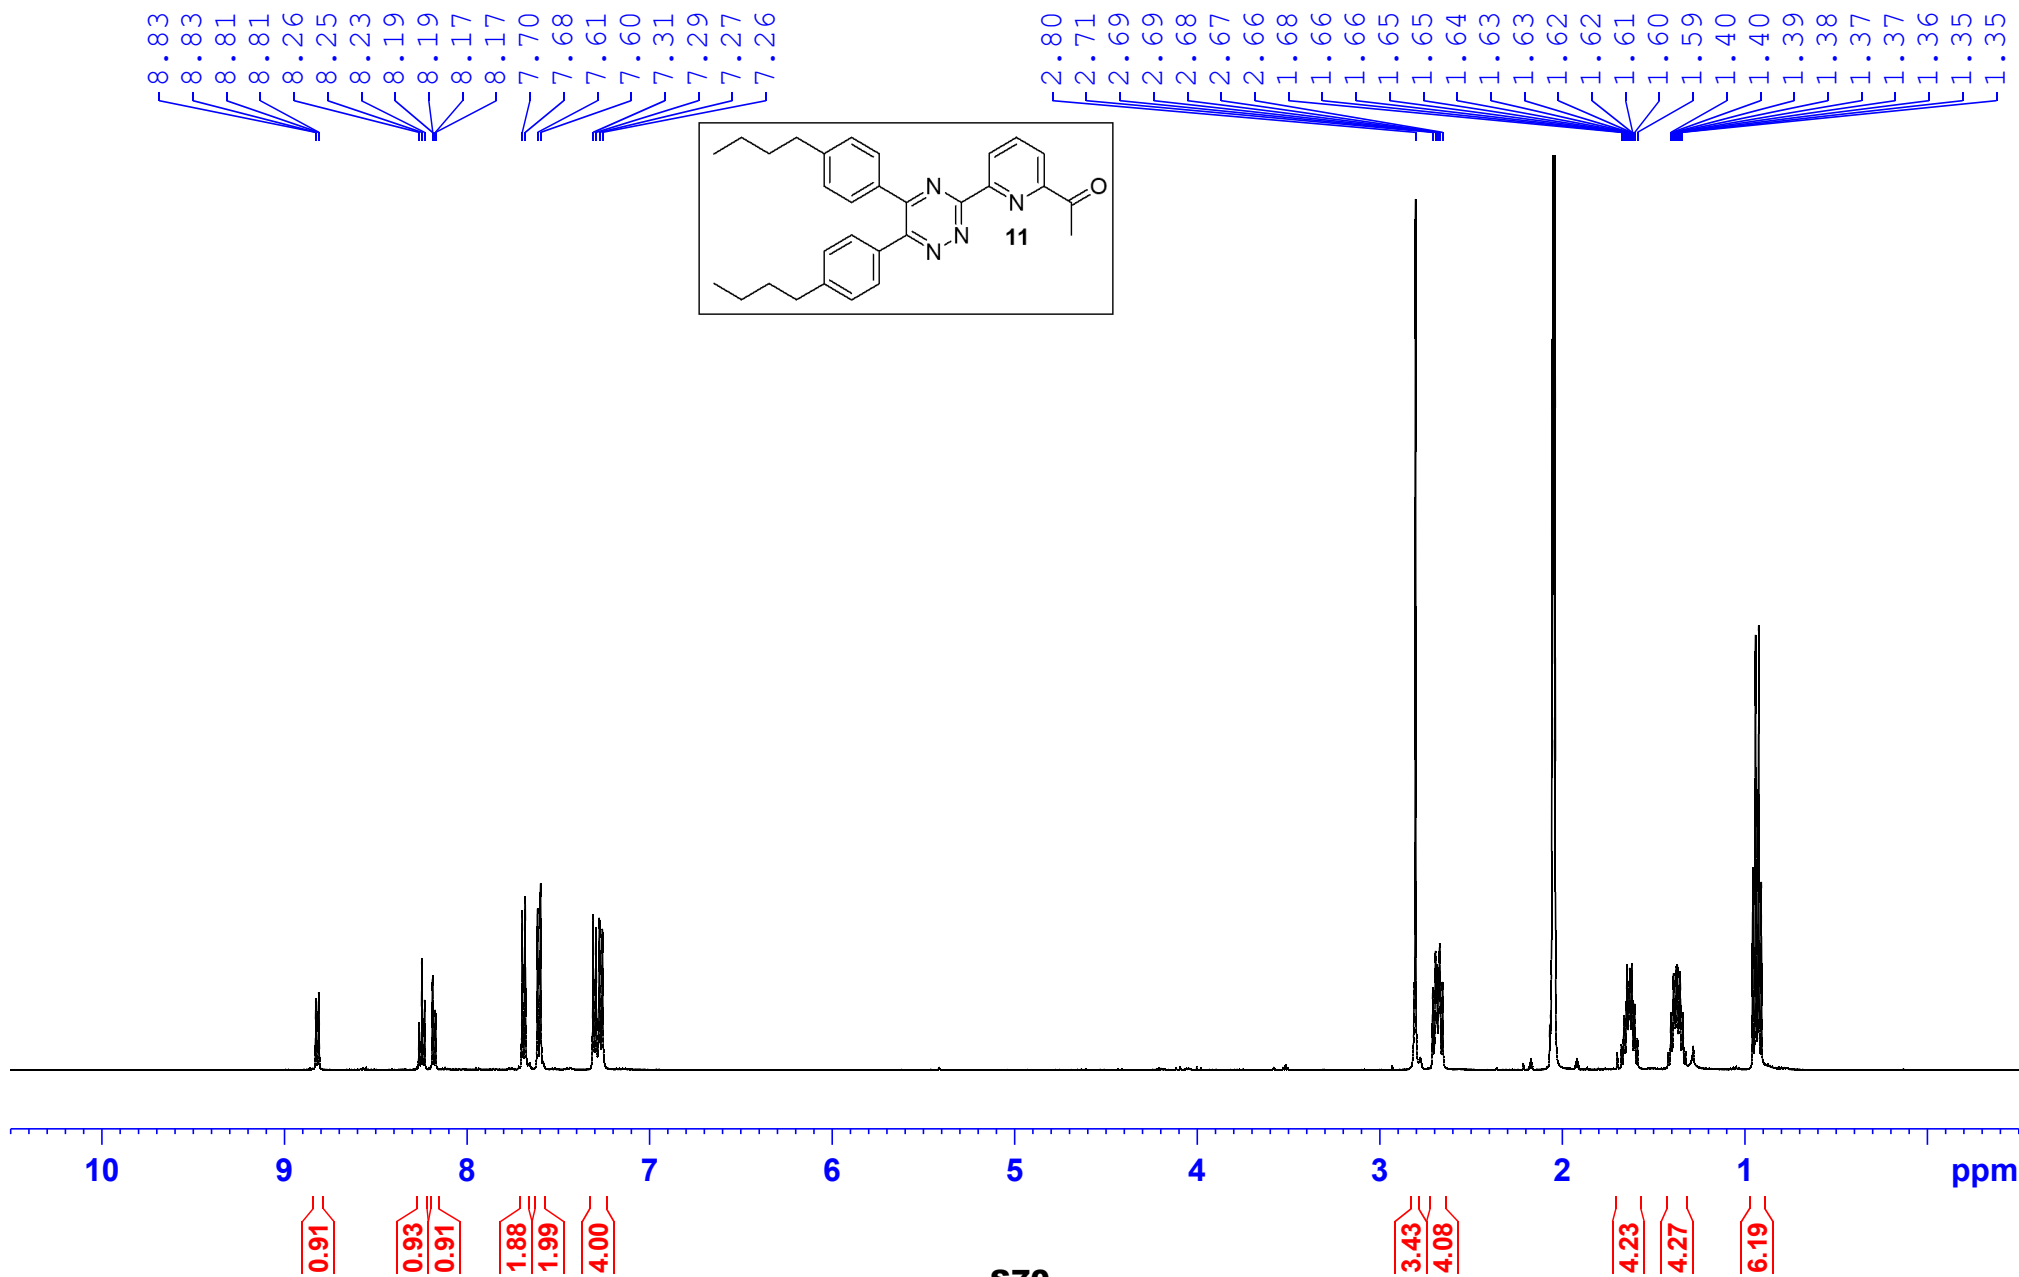

1-{6-[5,6-Bis-(4-butyl-phenyl)-[1,2,4]triazin-3-yl]-pyridin-2-yl}-ethanone (11)  
ZZG-J-31 (5)

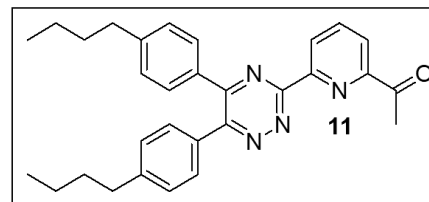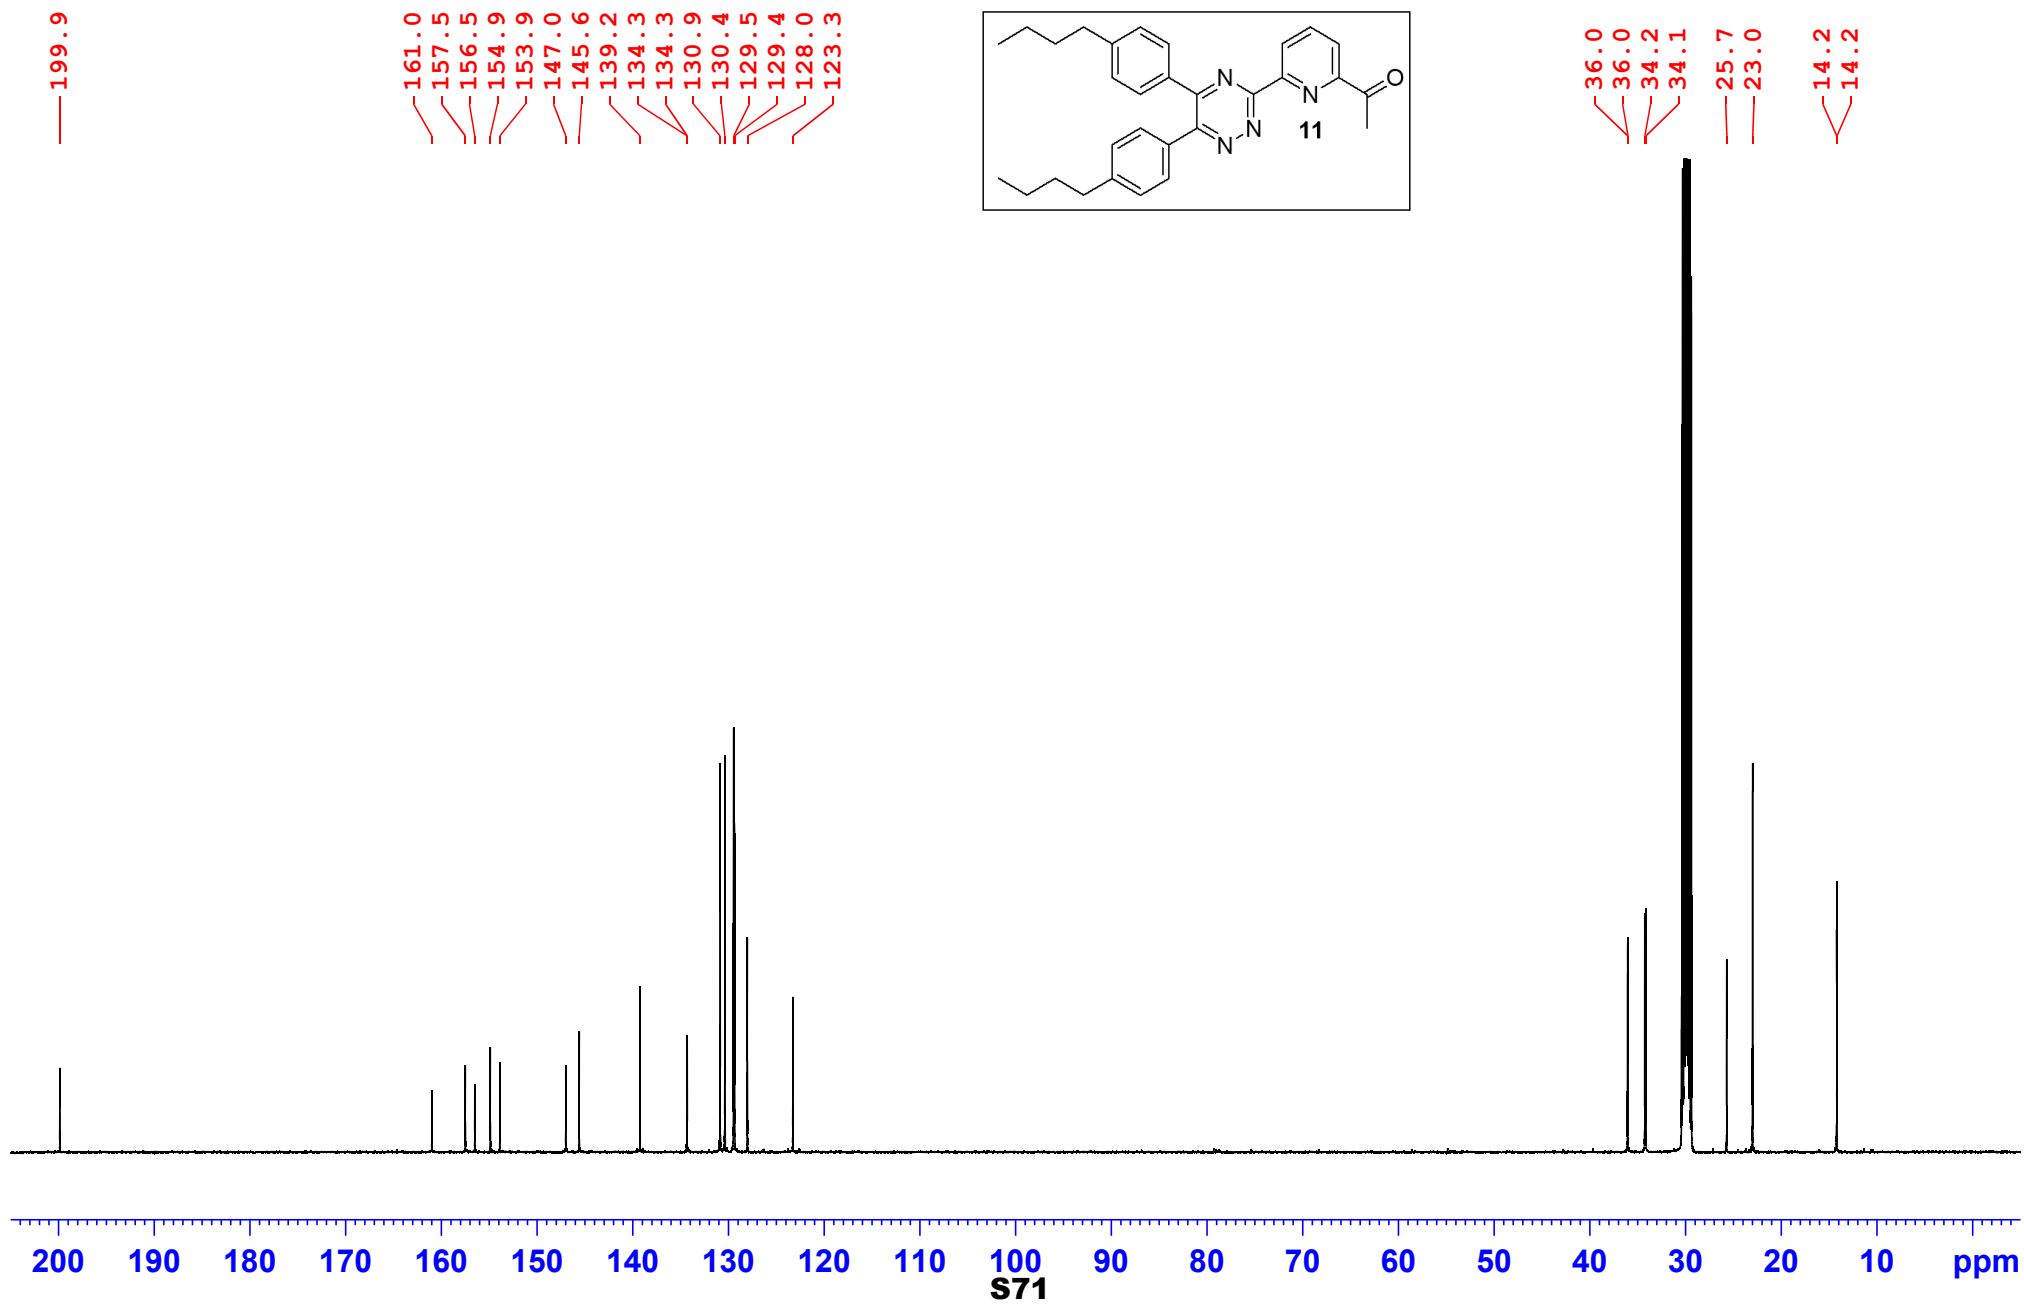

1-{6-[5,6-Bis-(4-fluoro-phenyl)-[1,2,4]triazin-3-yl]-pyridin-2-yl}-ethanone (12)  
ZZG-J-35 (4)

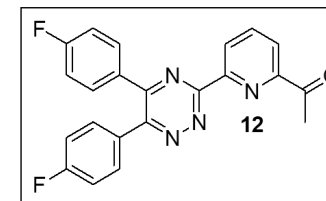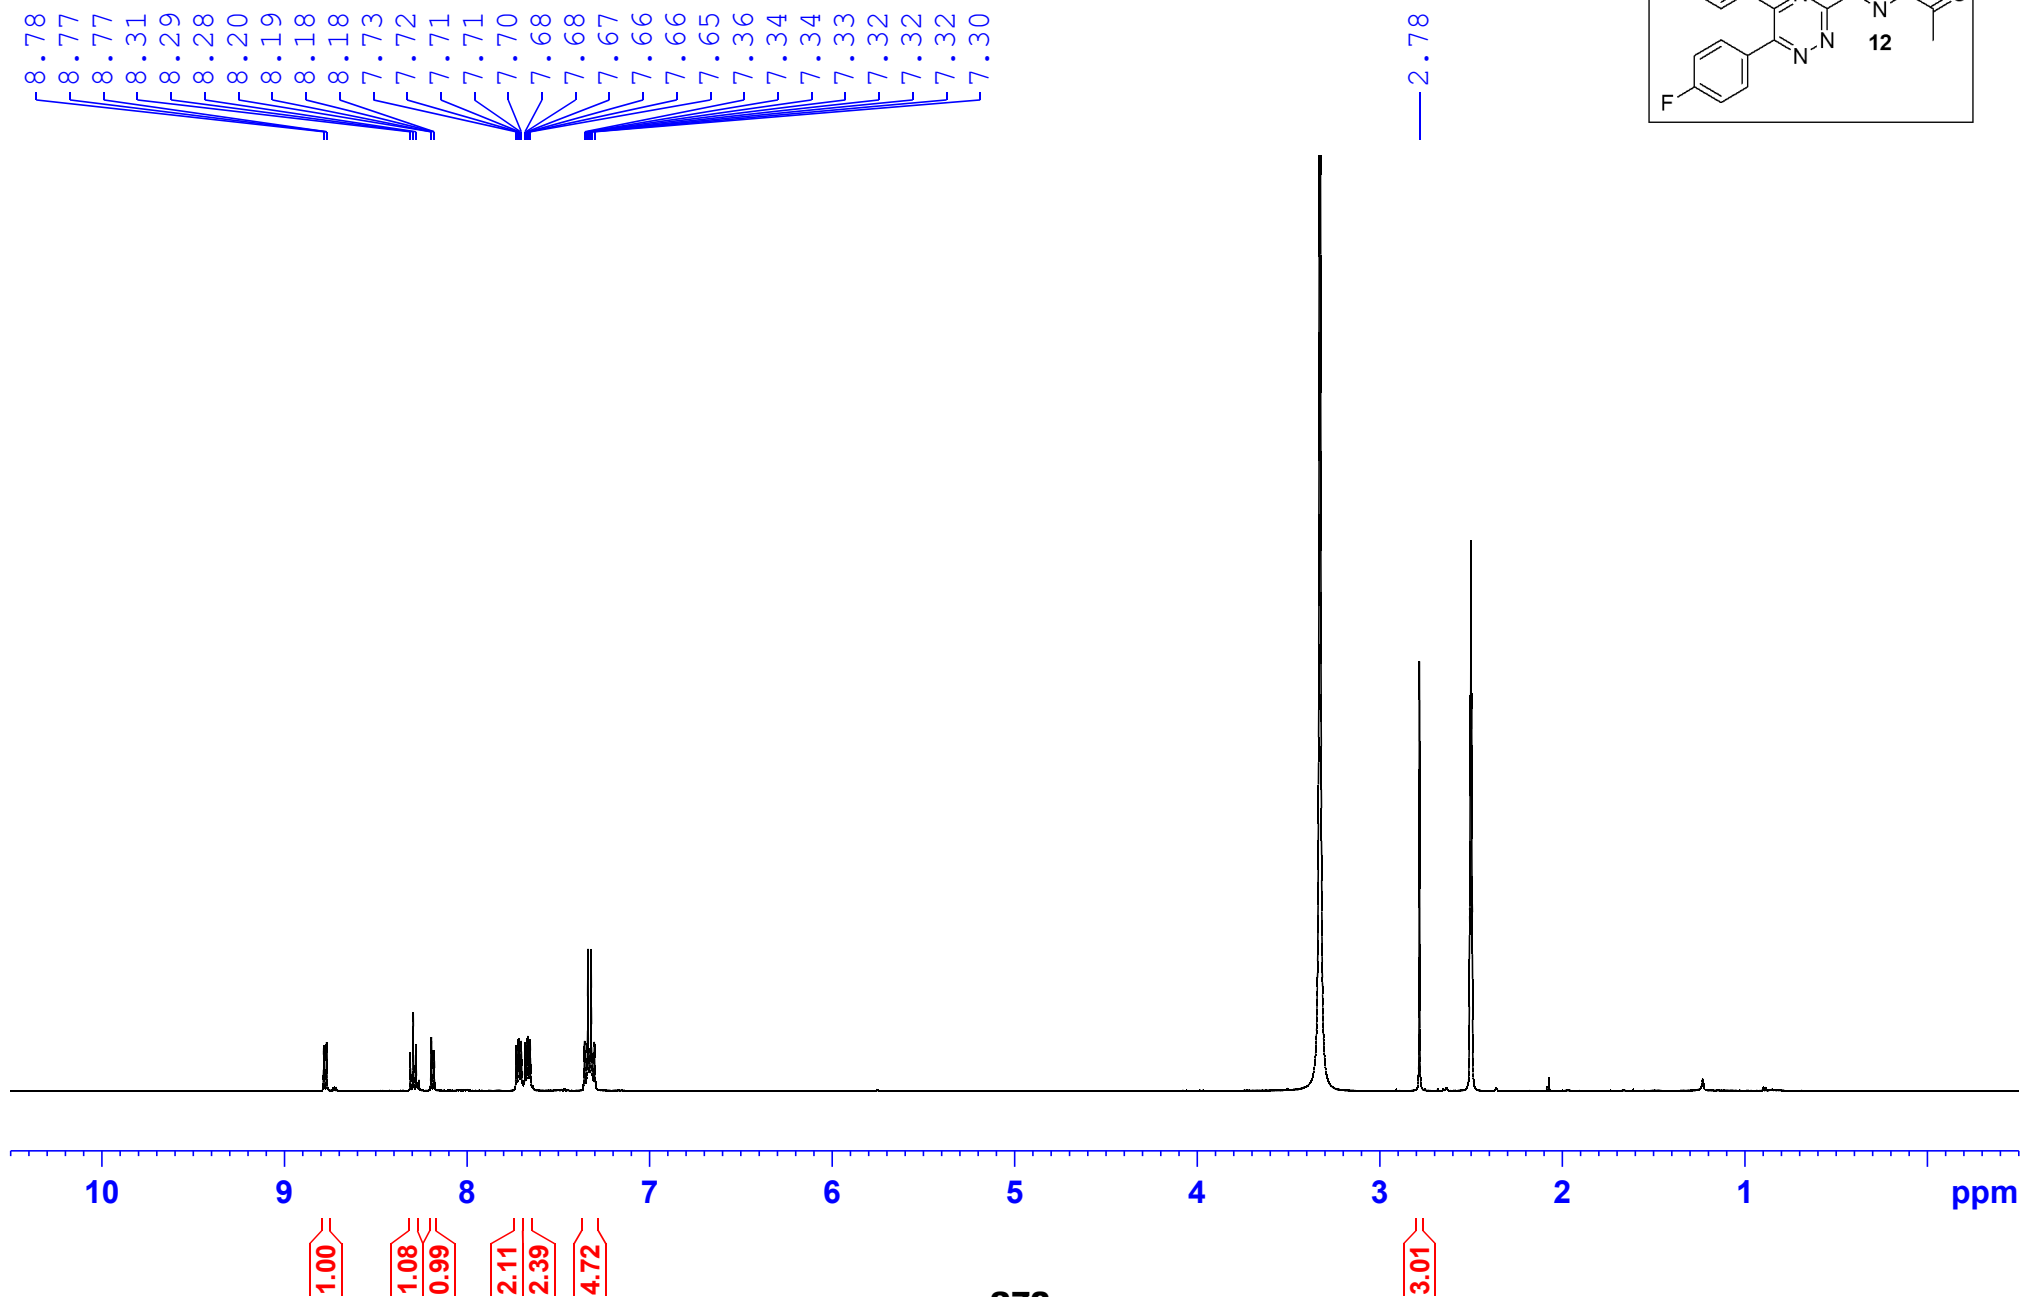



1-{6-[5,6-Bis-(4-fluoro-phenyl)-[1,2,4]triazin-3-yl]-pyridin-2-yl}-ethanone (12)  
ZZG-J-35 (6)

199.3  
164.5  
164.0  
162.6  
162.0  
159.9  
155.8  
155.1  
153.4  
152.1  
139.0  
132.4  
132.4  
131.9  
131.8  
131.7  
131.7  
131.7  
131.7  
127.5  
122.8  
115.8  
115.8  
115.7  
115.6

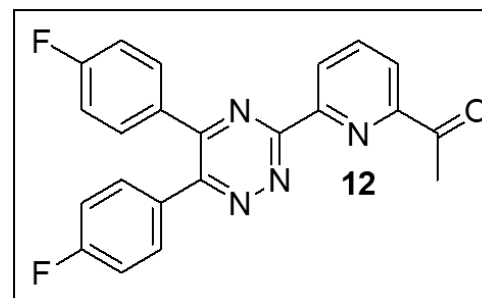

25.5

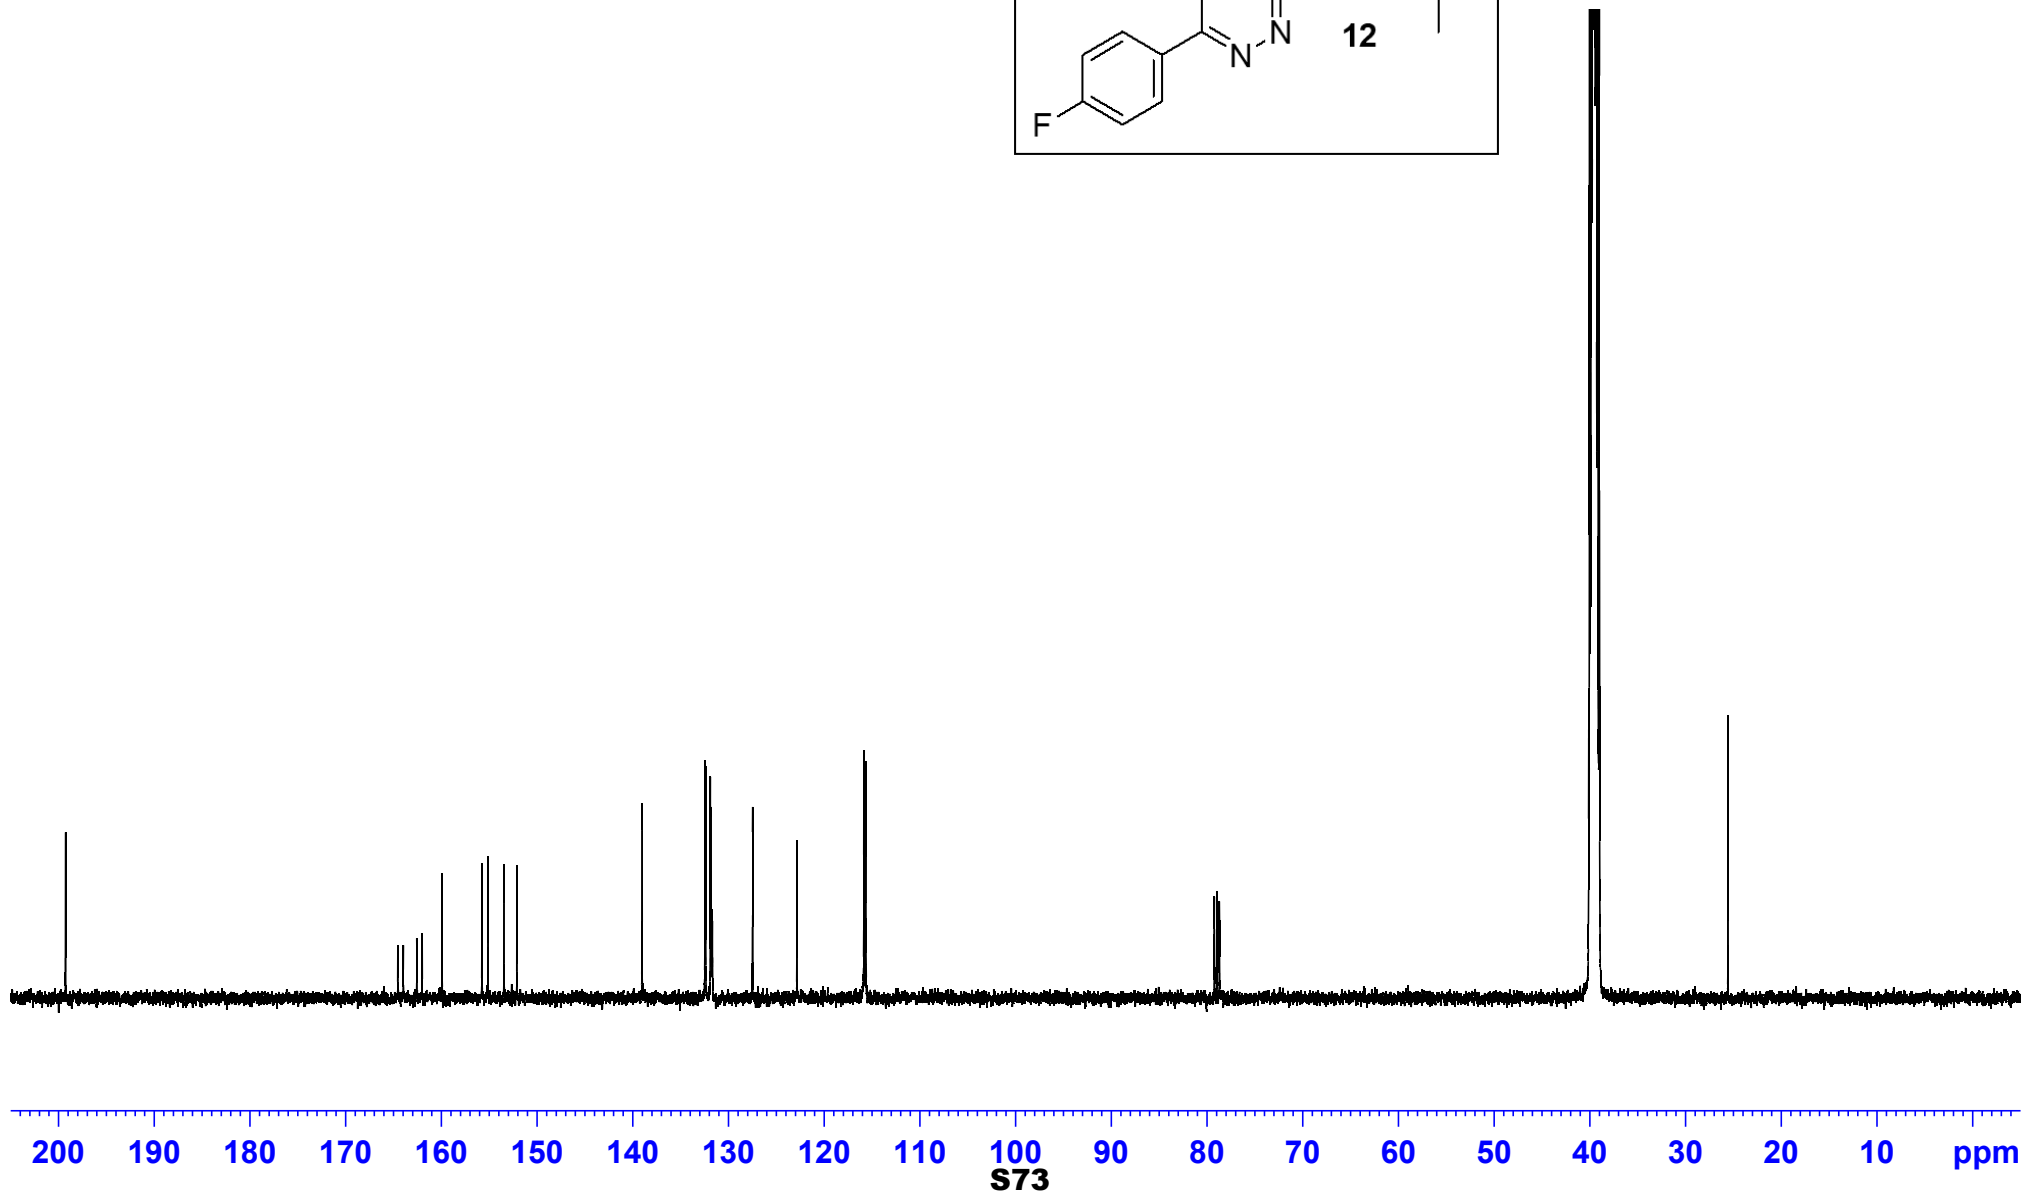

1-{6-[5,6-Bis-(4-fluoro-phenyl)-[1,2,4]triazin-3-yl]-pyridin-2-yl}-ethanone (12)  
ZZG-J-35 (6)

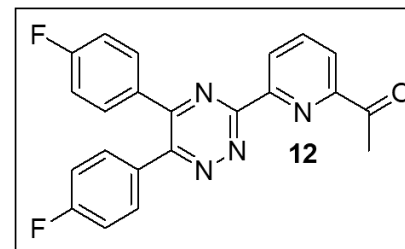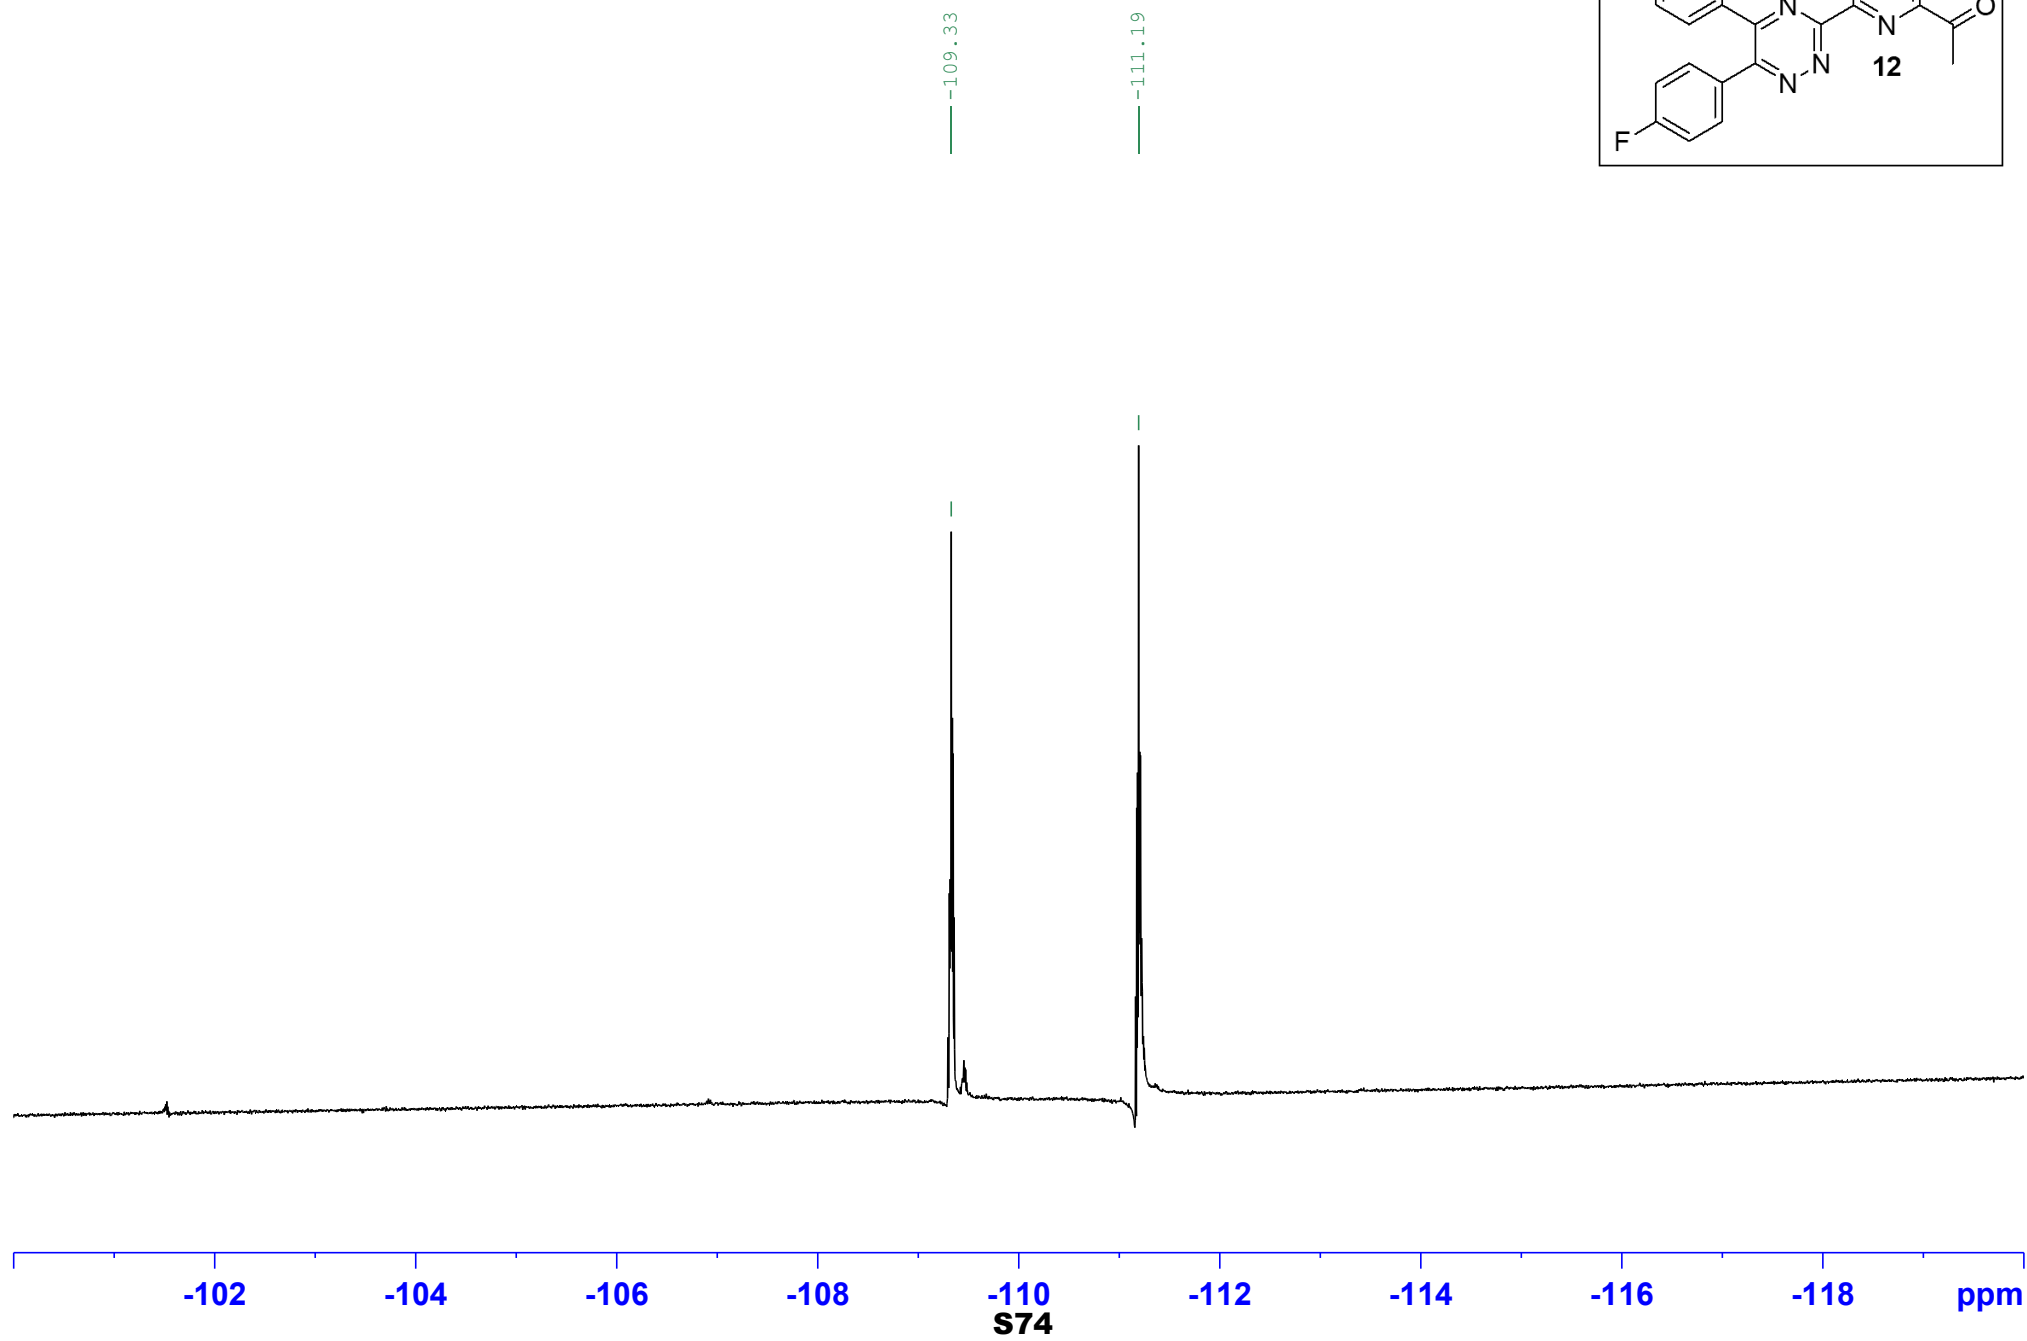

1-{6-[5,6-Bis-(4-cyclopropyl-phenyl)-[1,2,4]triazin-3-yl]-pyridin-2-yl}-ethanone (13)  
AMS-A-251 (4)

8.82  
8.80  
8.26  
8.24  
8.23  
8.18  
8.17  
7.68  
7.66  
7.59  
7.57  
7.18  
7.17  
7.15  
7.13

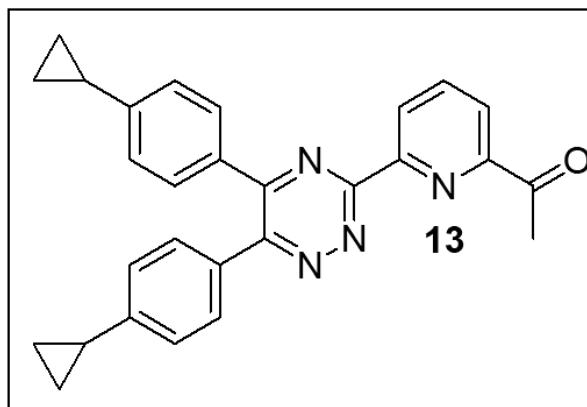

2.79

1.05  
1.03  
0.77

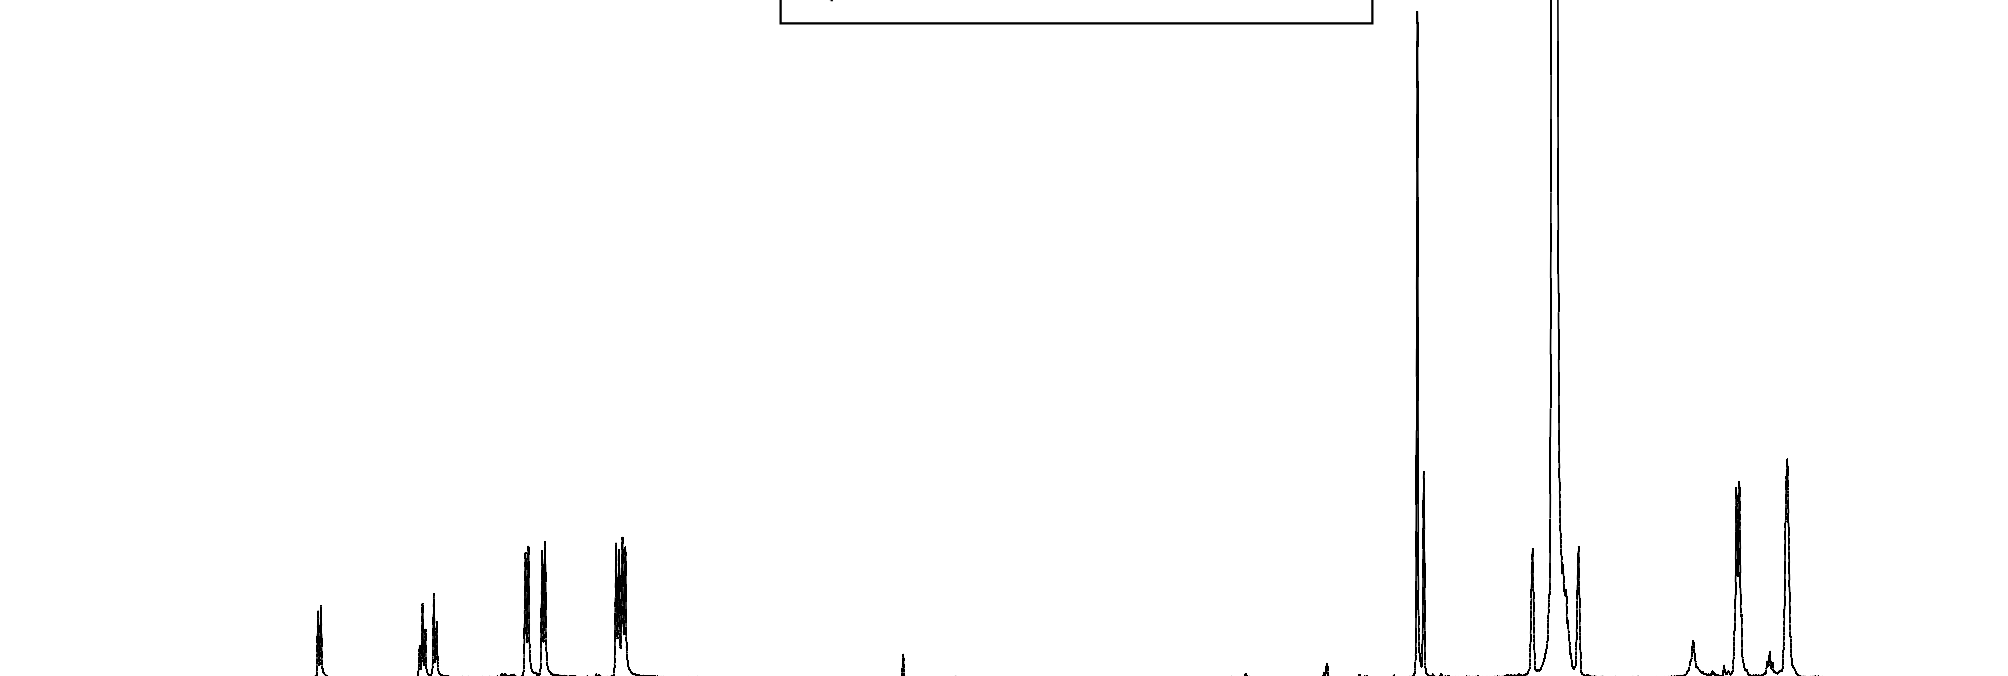

10 9 8 7 6 5 4 3 2 1 ppm

0.99

1.02  
1.00

2.03  
2.06

4.30

4.27

4.27  
4.27

1-{6-[5,6-Bis-(4-cyclopropyl-phenyl)-[1,2,4]triazin-3-yl]-pyridin-2-yl}-ethanone (13)  
AMS-A-241 (4)

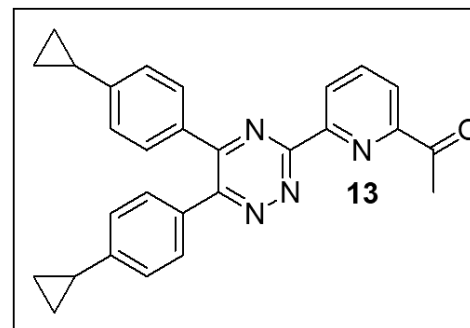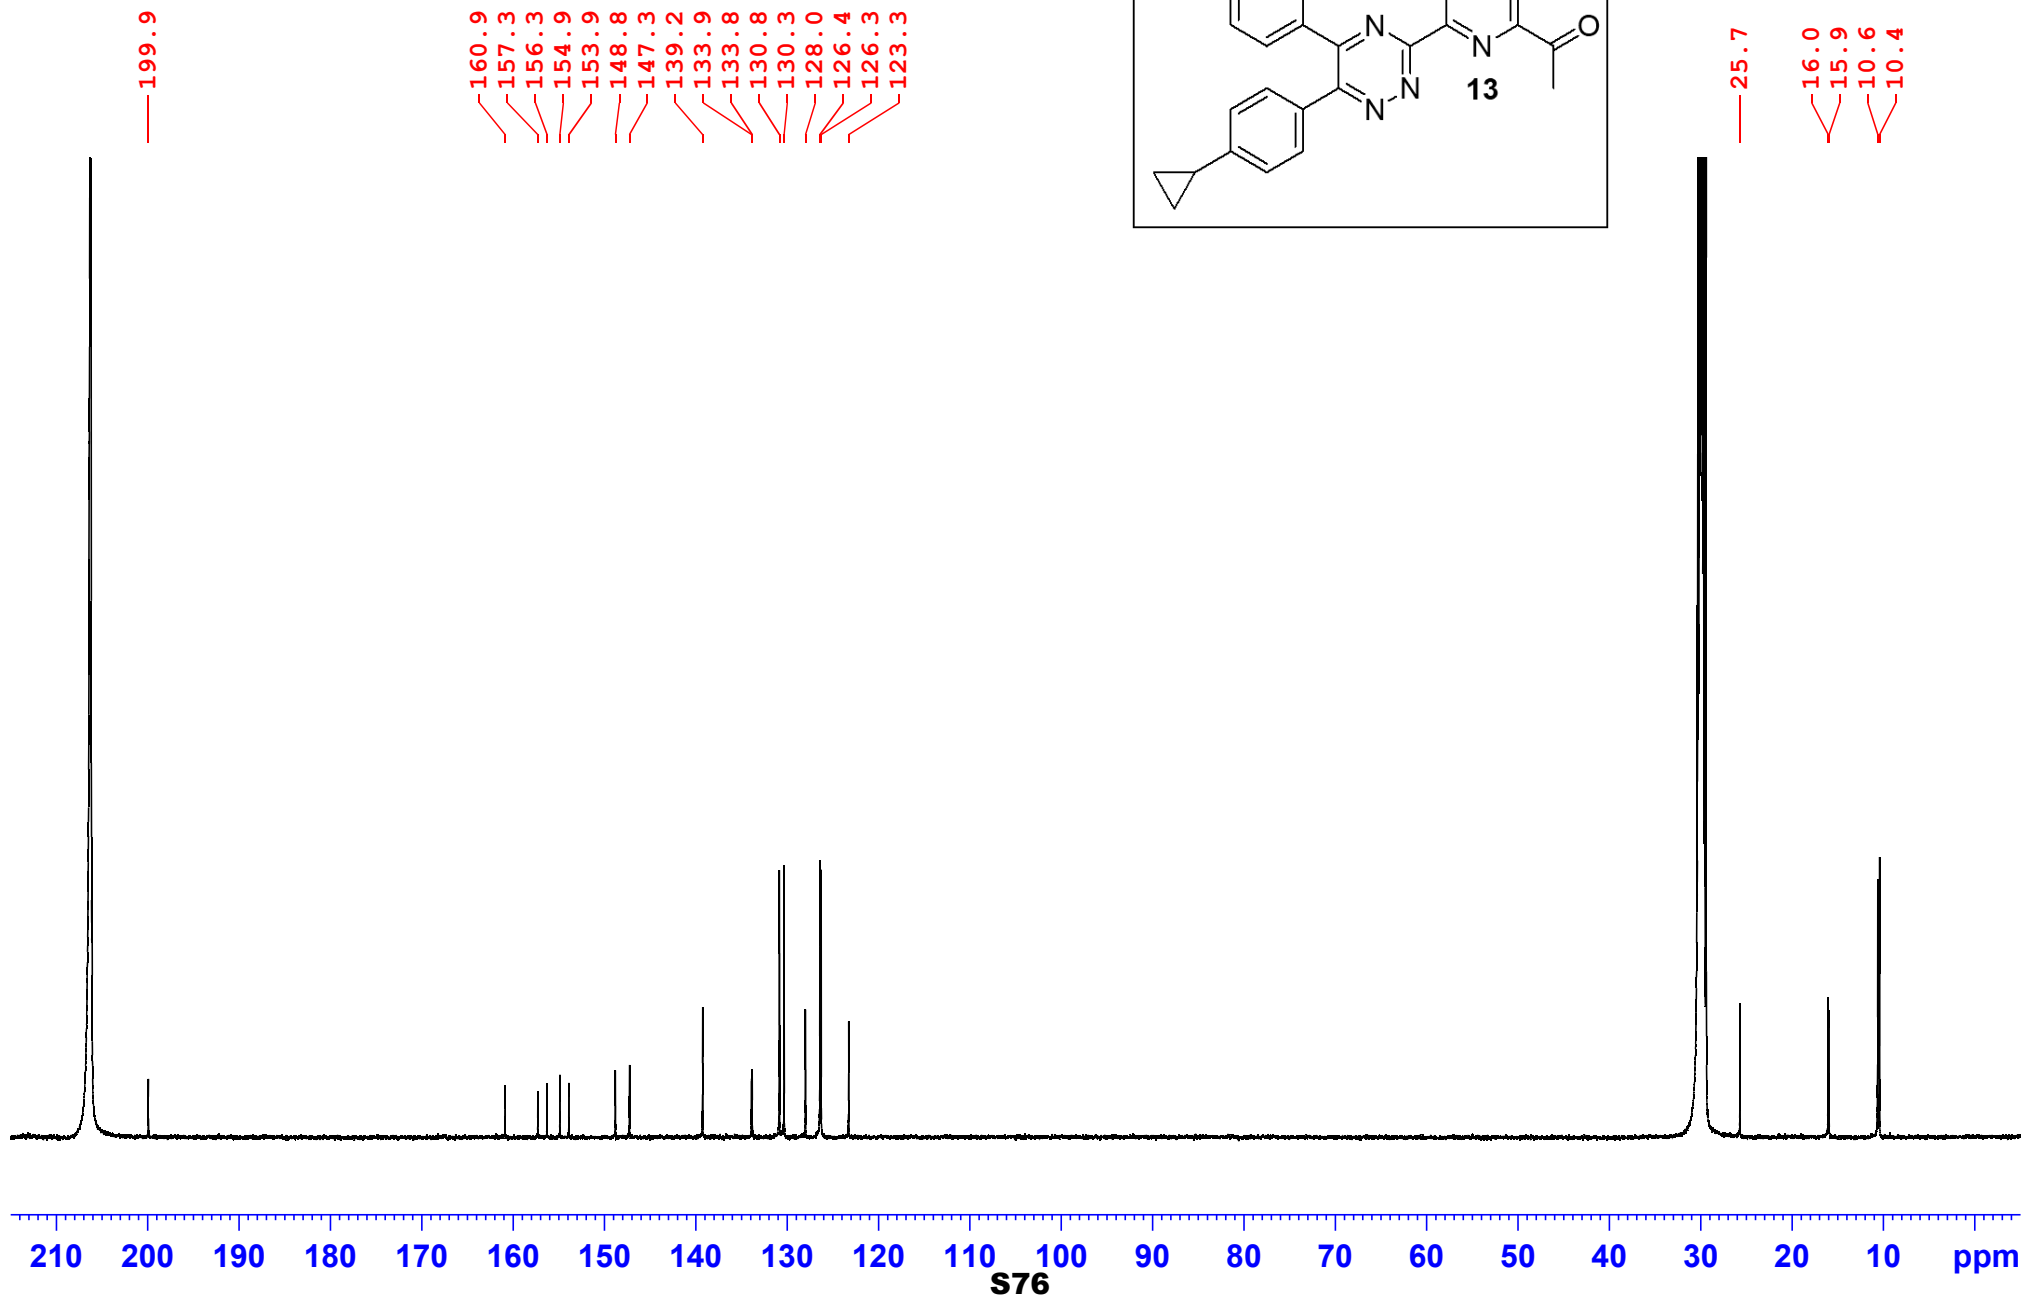

1-{6-[5,6-Bis-(3-methoxy-phenyl)-[1,2,4]triazin-3-yl]-pyridin-2-yl}-ethanone (14)  
ZZG-G-43(1)

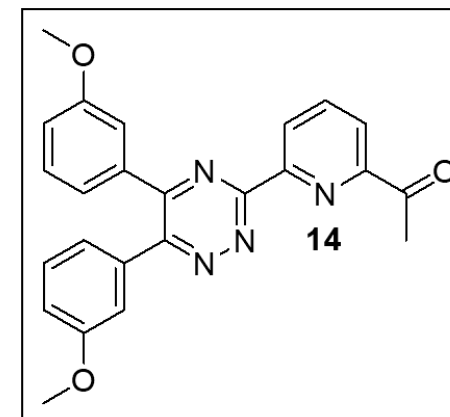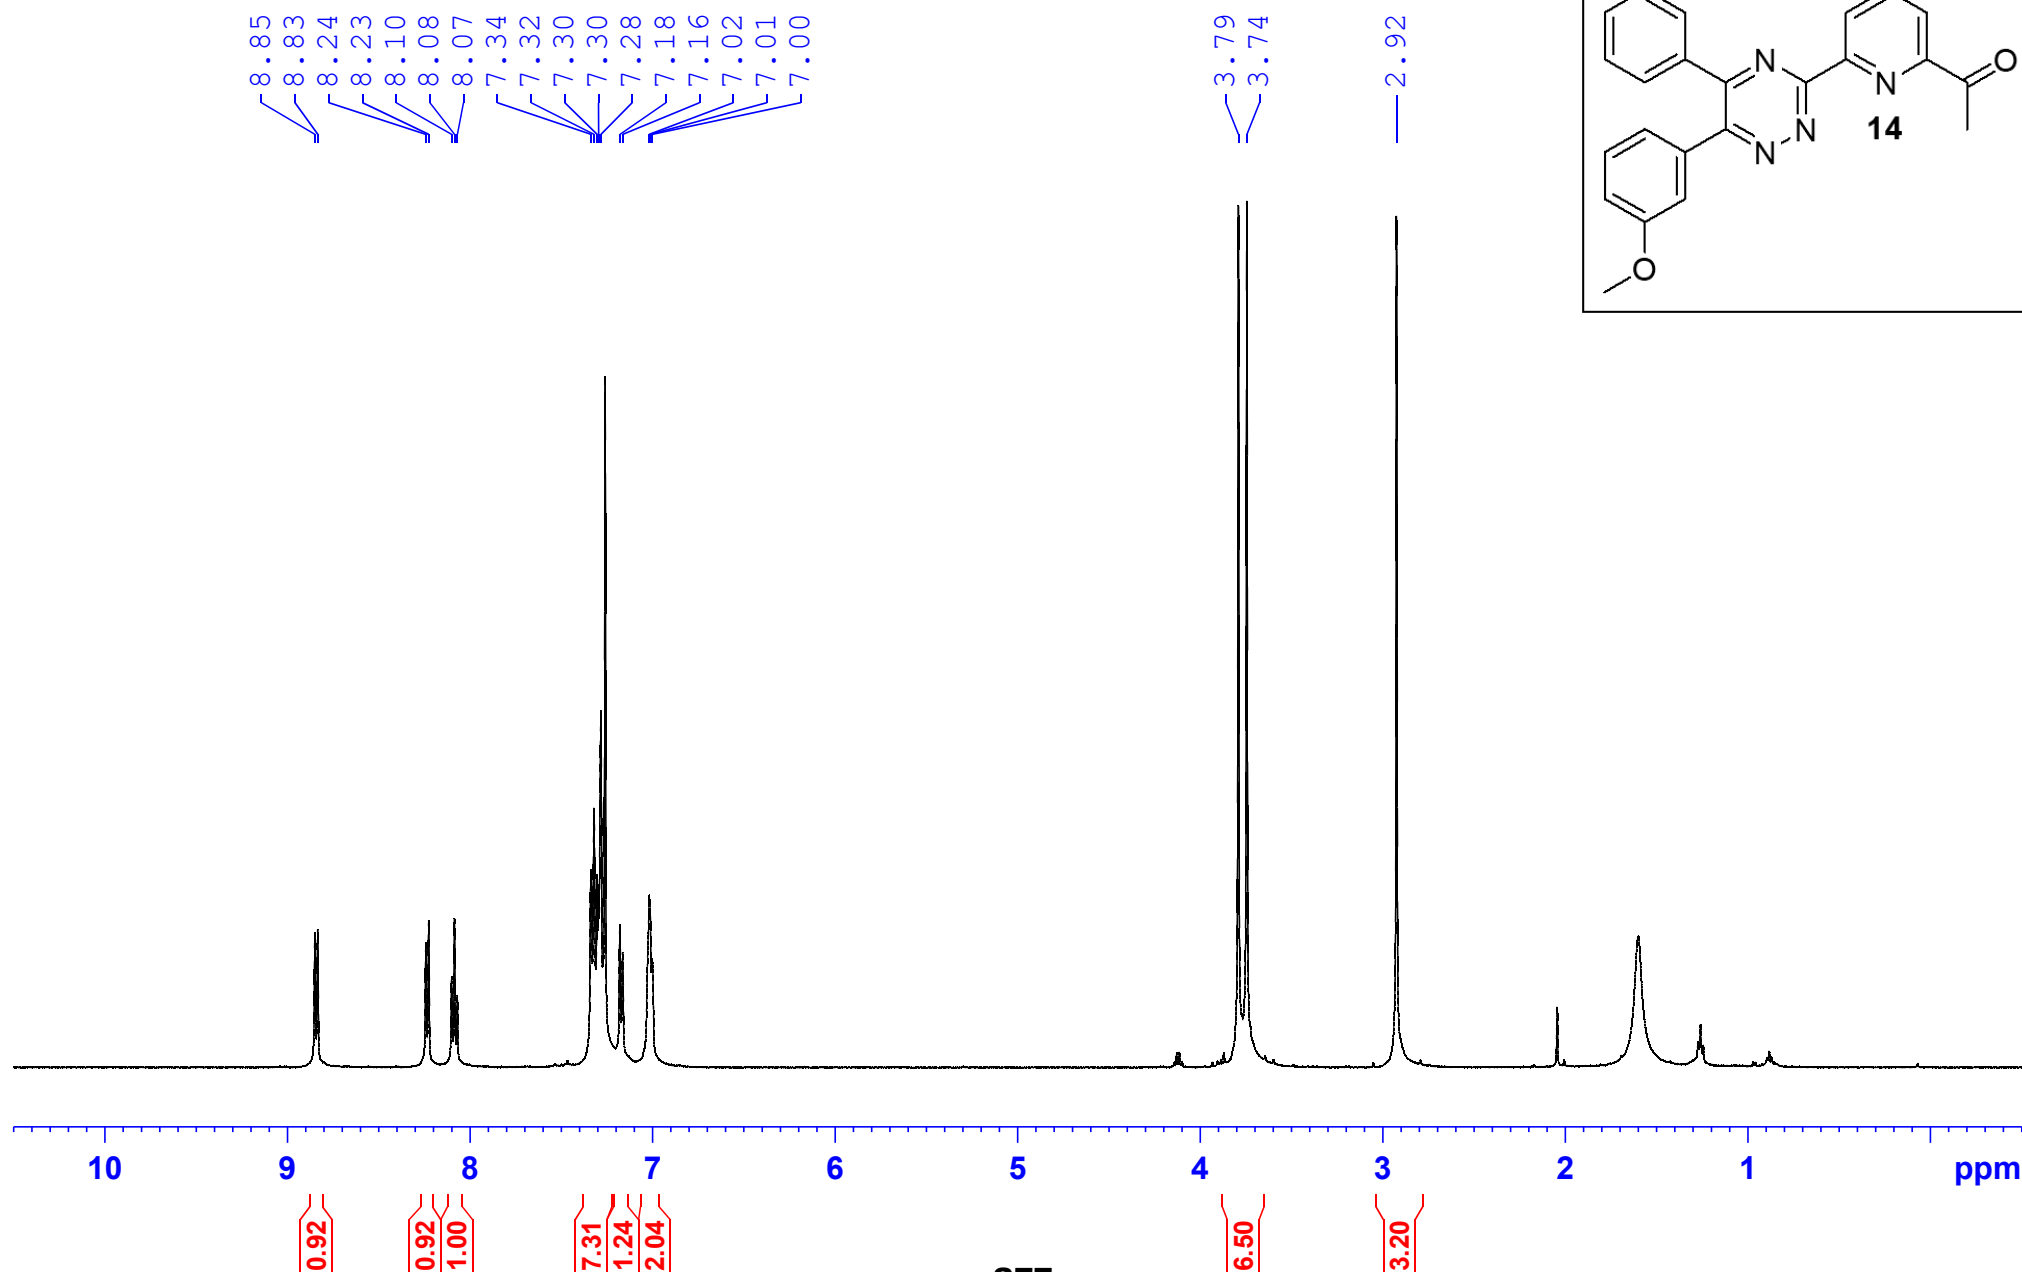

1-{6-[5,6-Bis-(3-methoxy-phenyl)-[1,2,4]triazin-3-yl]-pyridin-2-yl}-ethanone (14)  
ZZG-G-43(1)

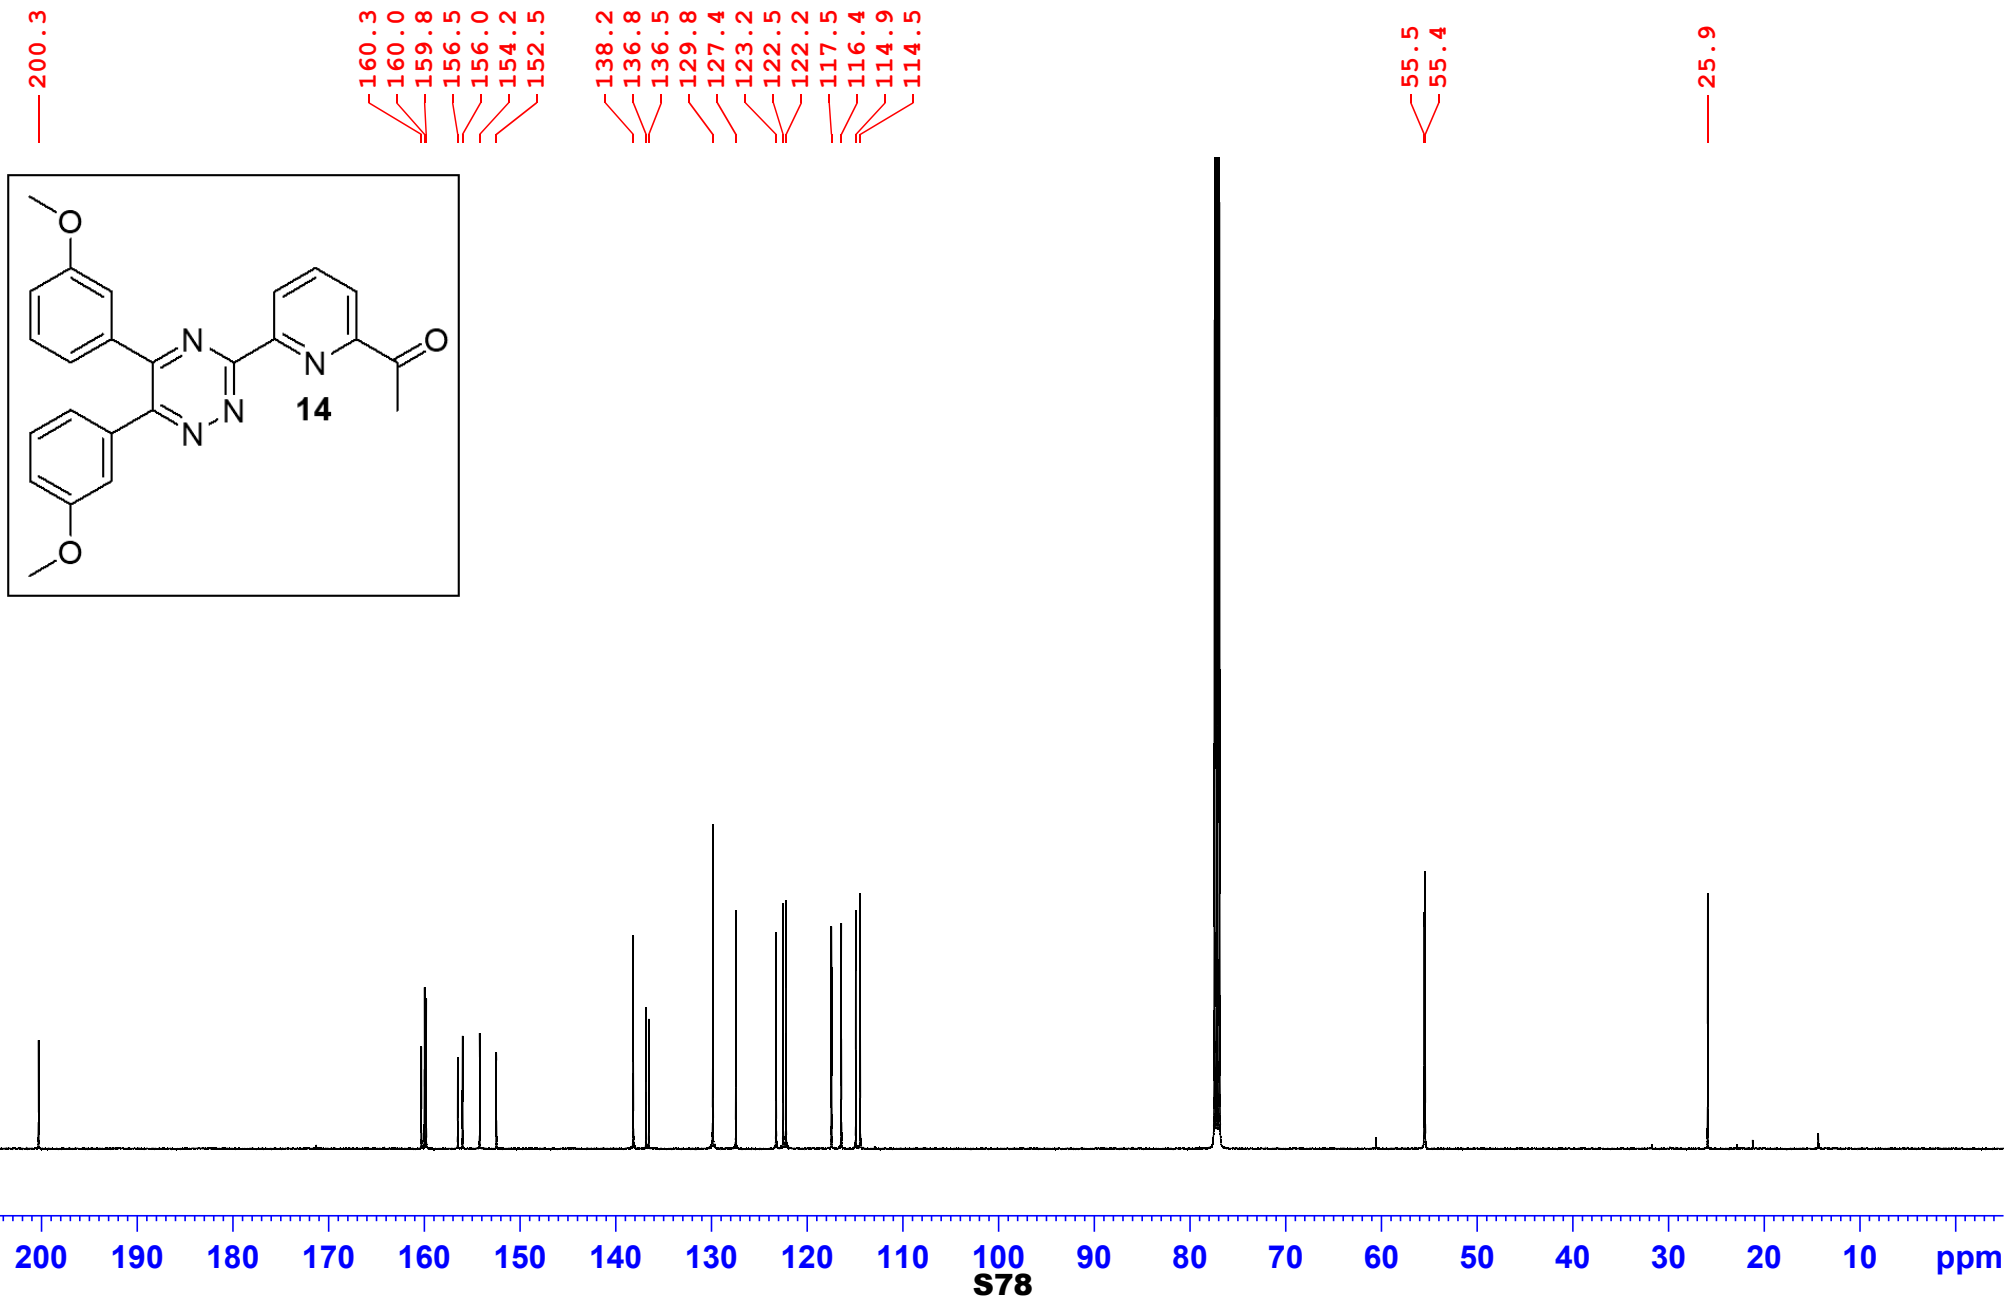

1-{6-[(Triisopropylsilyl)-ethynyl]-pyridin-2-yl}-ethanone (25)  
AMS-A-203 (17)

8.01  
7.99  
7.98  
7.96  
7.96  
7.95  
7.94  
7.79  
7.79  
7.77  
7.77

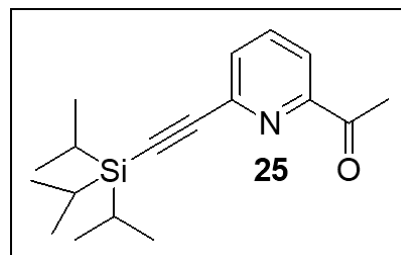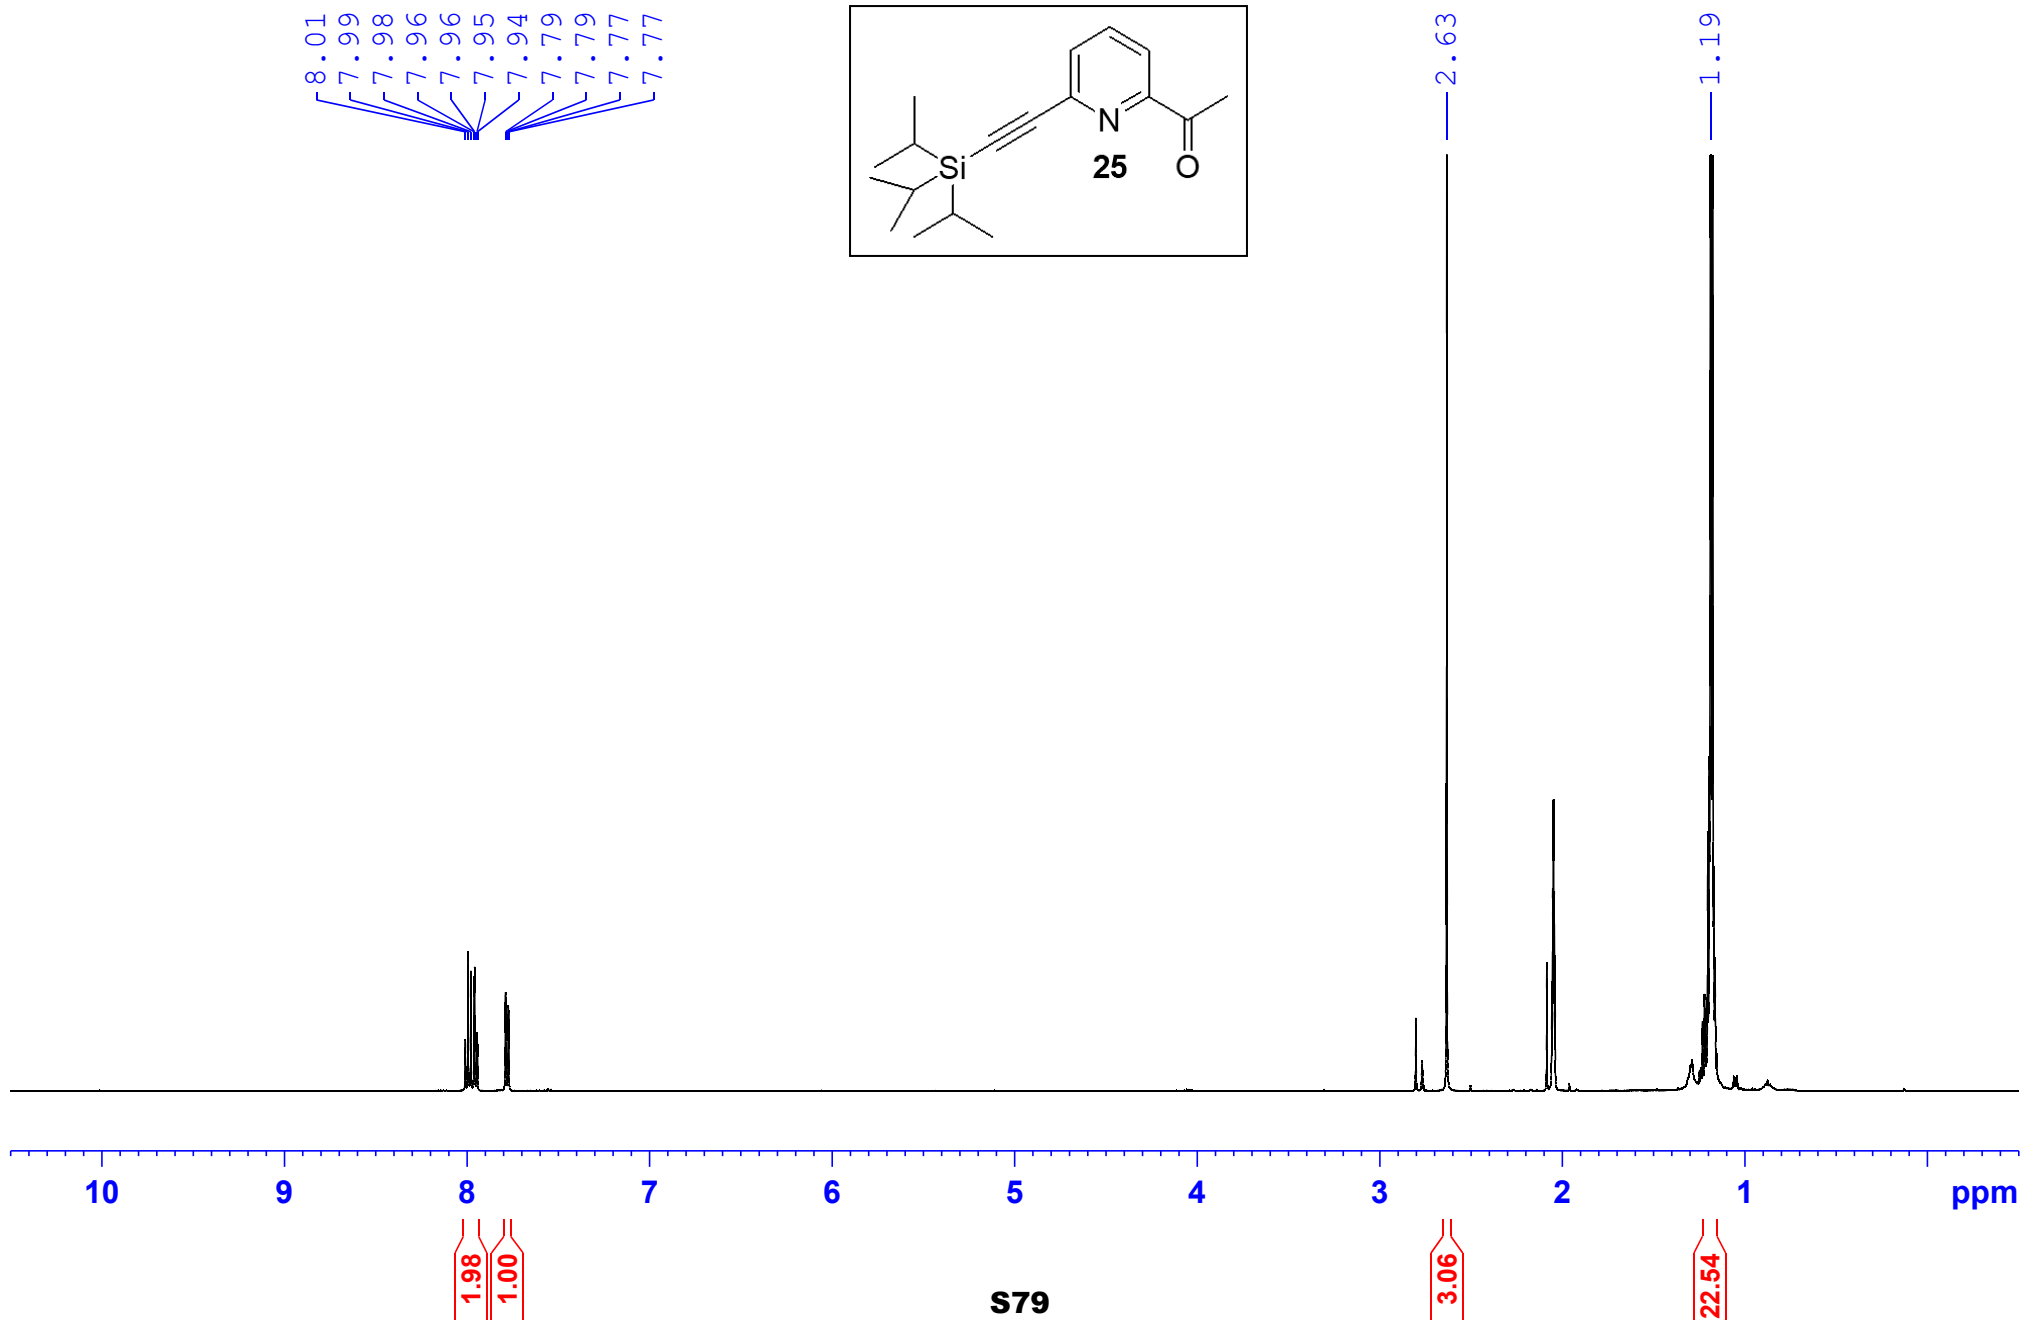

1-{6-[(Triisopropylsilyl)-ethynyl]-pyridin-2-yl}-ethanone (25)  
AMS-A-203(17)

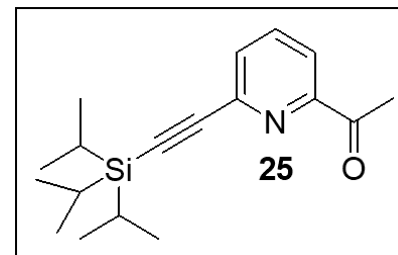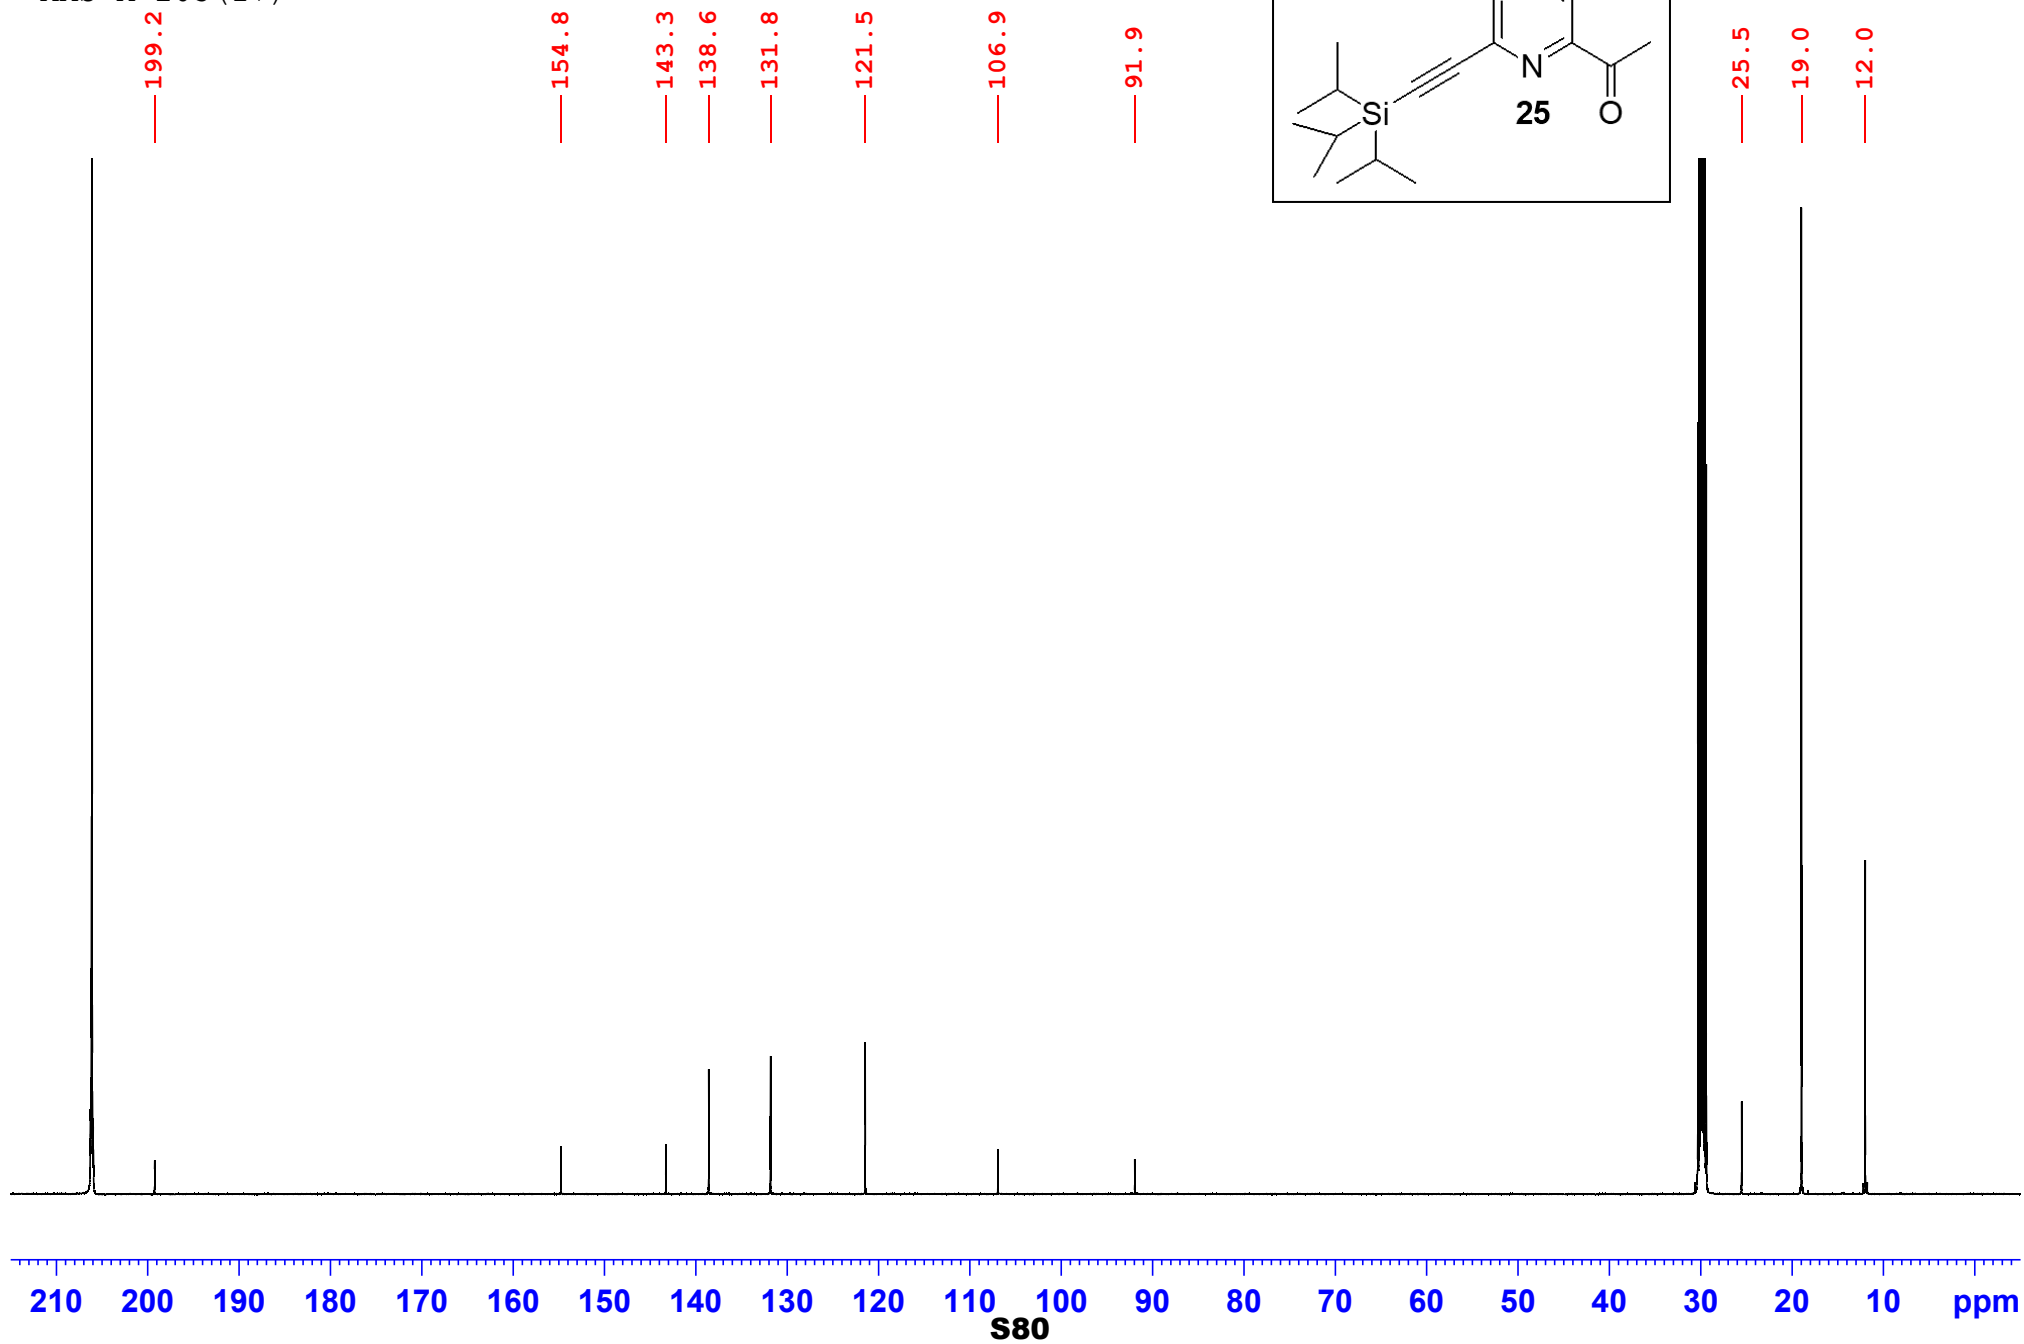



Sample: ZZG-G-63

Rf+

Wednesday 09 September 2020 06:50AM

RediSep Column: Silica 4g  
Flow Rate: 18 ml/min  
Equilibration Volume: 33.6 ml  
Initial Waste: 0.0 ml  
Air Purge: 1.0 min  
Solvent A: Hexane  
Solvent B: MTBE

Peak Tube Volume: Max.  
Non-Peak Tube Volume: Max.  
Loading Type: Solid  
Wavelength 1 (red): 254nm  
Peak Width: 30 sec  
Threshold: 0.20 AU  
Wavelength 2 (purple): 280nm

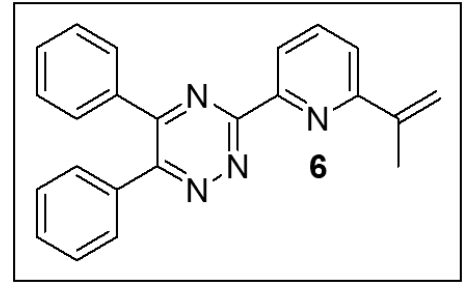

Run Notes:

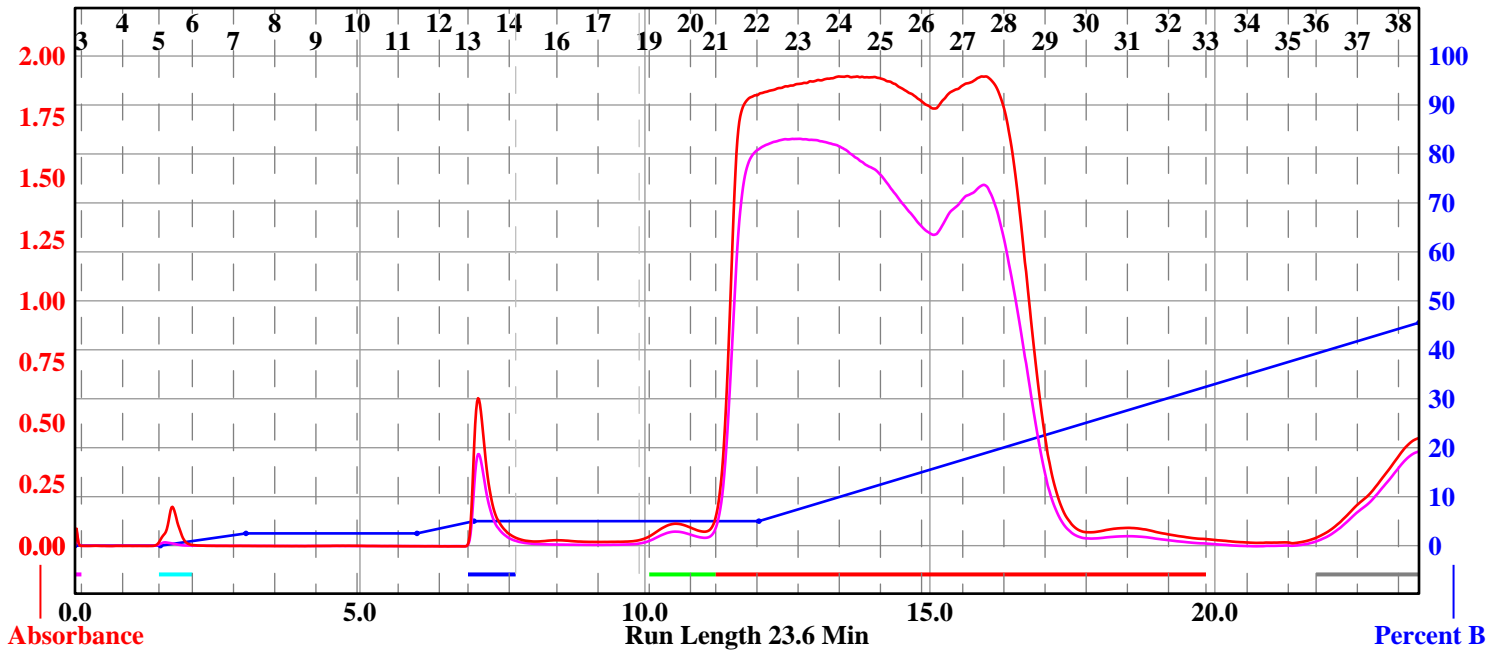

| Rack A |      |      |      |      | Peak # | Start Tube | End Tube |
|--------|------|------|------|------|--------|------------|----------|
| (71)   | (72) | (73) | (74) | (75) | 1      | A:2        | A:2      |
| (70)   | (69) | (68) | (67) | (66) | 2      | A:5        | A:5      |
| (61)   | (62) | (63) | (64) | (65) | 3      | A:13       | A:14     |
| (60)   | (59) | (58) | (57) | (56) | 4      | A:19       | A:20     |
| (51)   | (52) | (53) | (54) | (55) | 5      | A:21       | A:32     |
| (50)   | (49) | (48) | (47) | (46) | 6      | A:36       | A:38     |
| (41)   | (42) | (43) | (44) | (45) |        |            |          |
| (40)   | (39) | (38) | (37) | (36) |        |            |          |
| (31)   | (32) | (33) | (34) | (35) |        |            |          |
| (30)   | (29) | (28) | (27) | (26) |        |            |          |
| (21)   | (22) | (23) | (24) | (25) |        |            |          |
| (20)   | (19) | (18) | (17) | (16) |        |            |          |
| (11)   | (12) | (13) | (14) | (15) |        |            |          |
| (10)   | (9)  | (8)  | (7)  | (6)  |        |            |          |
| (1)    | (2)  | (3)  | (4)  | (5)  |        |            |          |

  

| Duration | %B   | Solvent A | Solvent B |
|----------|------|-----------|-----------|
| 0.0      | 0.0  | Hexane    | MTBE      |
| 1.5      | 0.0  | Hexane    | MTBE      |
| 1.5      | 2.5  | Hexane    | MTBE      |
| 3.0      | 2.5  | Hexane    | MTBE      |
| 1.0      | 5.0  | Hexane    | MTBE      |
| 5.0      | 5.0  | Hexane    | MTBE      |
| 11.6     | 45.5 | Hexane    | MTBE      |

16 mm x 100 mm Tubes

Sample: ZZG-F-251

Rf+

Wednesday 05 August 2020 11:25AM

RediSep Column: Silica 12g  
SN: E04150D81BD3C Lot: 301341205X  
Flow Rate: 30 ml/min  
Equilibration Volume: 100.8 ml  
Initial Waste: 0.0 ml  
Air Purge: 0.5 min  
Solvent A: Hexane  
Solvent B: Ethyl Acetate

Peak Tube Volume: Max.  
Non-Peak Tube Volume: Max.  
Loading Type: Solid  
Wavelength 1 (red): 254nm  
Peak Width: 1 min  
Threshold: 0.20 AU  
Wavelength 2 (purple): 280nm

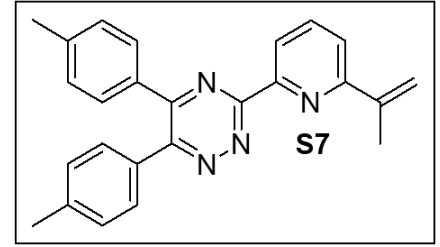

Run Notes:

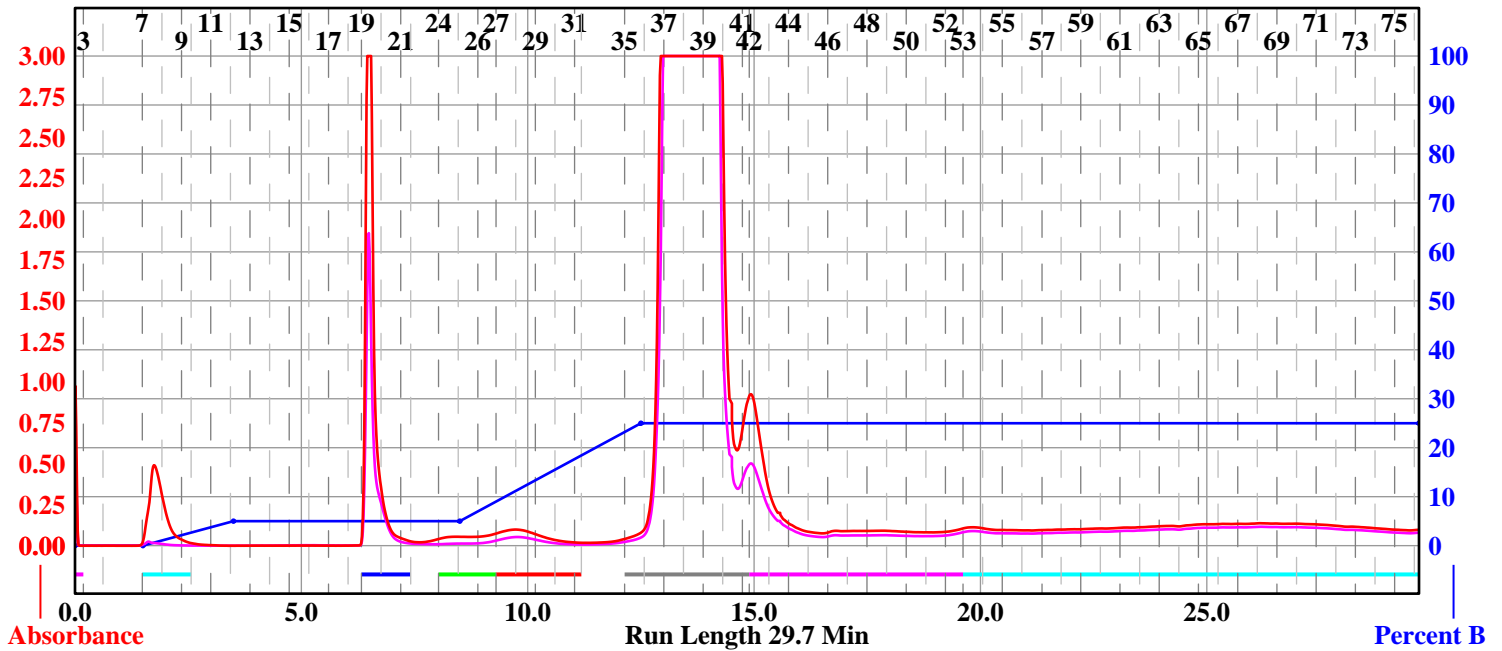

| Rack A |    |    |    |    |
|--------|----|----|----|----|
| 71     | 72 | 73 | 74 | 75 |
| 70     | 69 | 68 | 67 | 66 |
| 61     | 62 | 63 | 64 | 65 |
| 60     | 59 | 58 | 57 | 56 |
| 51     | 52 | 53 | 54 | 55 |
| 50     | 49 | 48 | 47 | 46 |
| 41     | 42 | 43 | 44 | 45 |
| 40     | 39 | 38 | 37 | 36 |
| 31     | 32 | 33 | 34 | 35 |
| 30     | 29 | 28 | 27 | 26 |
| 21     | 22 | 23 | 24 | 25 |
| 20     | 19 | 18 | 17 | 16 |
| 11     | 12 | 13 | 14 | 15 |
| 10     | 9  | 8  | 7  | 6  |
| 1      | 2  | 3  | 4  | 5  |

| Peak # | Start Tube | End Tube |
|--------|------------|----------|
| 1      | A:2        | A:2      |
| 2      | A:7        | A:9      |
| 3      | A:19       | A:21     |
| 4      | A:24       | A:26     |
| 5      | A:27       | A:31     |
| 6      | A:35       | A:41     |
| 7      | A:42       | A:52     |
| 8      | A:53       | A:1      |

| Duration | %B   | Solvent A | Solvent B     |
|----------|------|-----------|---------------|
| 0.0      | 0.0  | Hexane    | Ethyl Acetate |
| 1.5      | 0.0  | Hexane    | Ethyl Acetate |
| 2.0      | 5.0  | Hexane    | Ethyl Acetate |
| 5.0      | 5.0  | Hexane    | Ethyl Acetate |
| 4.0      | 25.0 | Hexane    | Ethyl Acetate |
| 17.2     | 25.0 | Hexane    | Ethyl Acetate |

16 mm x 100 mm Tubes

Sample: ZZG-G-11

Rf+

Friday 28 August 2020 07:42AM

RediSep Column: Silica 4g  
Flow Rate: 18 ml/min  
Equilibration Volume: 33.6 ml  
Initial Waste: 0.0 ml  
Air Purge: 0.5 min  
Solvent A: Hexane  
Solvent B: 1:1 MTBE:EtOAc

Peak Tube Volume: Max.  
Non-Peak Tube Volume: Max.  
Loading Type: Solid  
Wavelength 1 (red): 254nm  
Peak Width: 30 sec  
Threshold: 0.20 AU  
Wavelength 2 (purple): 280nm

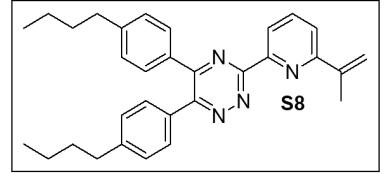

Run Notes:

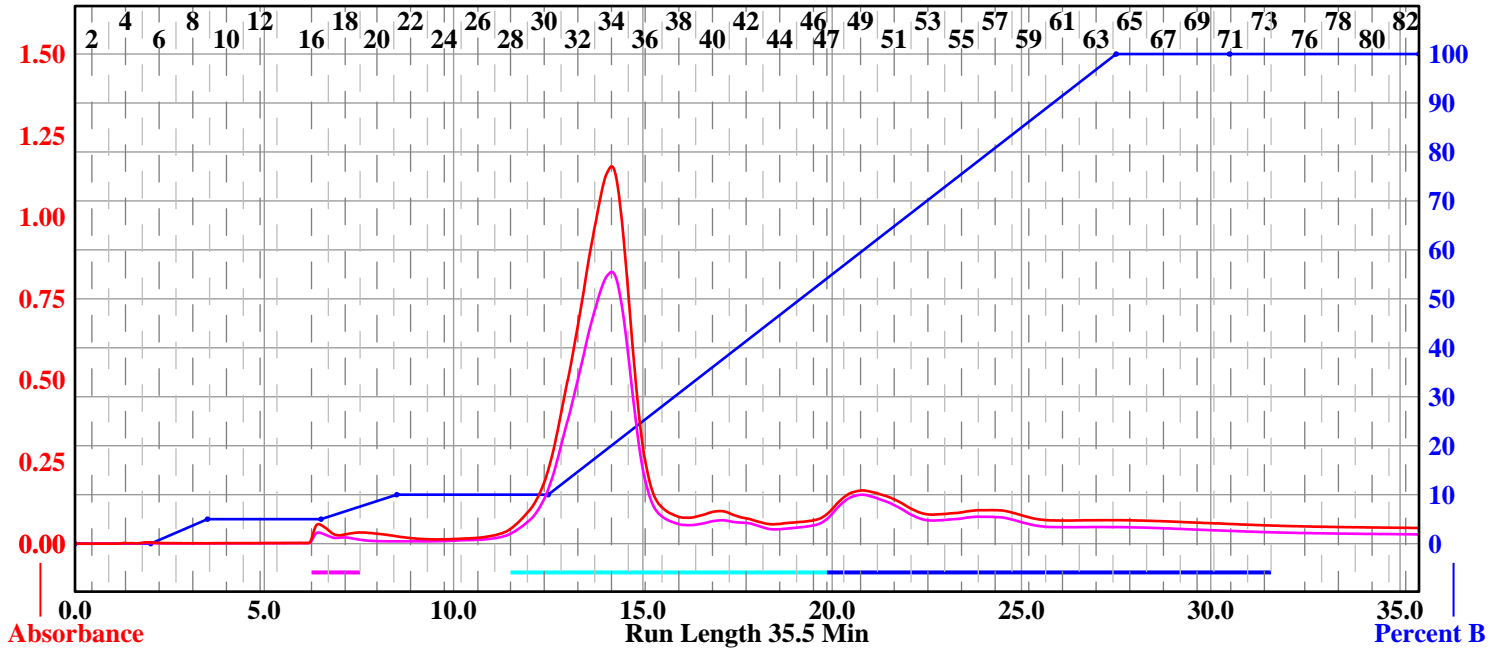

| Rack A |     |     |     |     |     |
|--------|-----|-----|-----|-----|-----|
| 108    | 107 | 106 | 105 | 104 | 103 |
| 97     | 98  | 99  | 100 | 101 | 102 |
| 96     | 95  | 94  | 93  | 92  | 91  |
| 85     | 86  | 87  | 88  | 89  | 90  |
| 84     | 83  | 82  | 81  | 80  | 79  |
| 74     | 74  | 75  | 76  | 77  | 78  |
| 64     | 64  | 64  | 64  | 64  | 64  |
| 54     | 54  | 54  | 54  | 54  | 54  |
| 44     | 44  | 44  | 44  | 44  | 44  |
| 34     | 34  | 34  | 34  | 34  | 34  |
| 25     | 26  | 27  | 28  | 29  | 30  |
| 24     | 23  | 22  | 21  | 20  | 19  |
| 13     | 14  | 15  | 16  | 17  | 18  |
| 12     | 11  | 10  | 9   | 8   | 7   |
| 1      | 2   | 3   | 4   | 5   | 6   |

| Peak # | Start Tube | End Tube |
|--------|------------|----------|
| 1      | A:16       | A:18     |
| 2      | A:28       | A:46     |
| 3      | A:47       | A:73     |

| Duration | %B    | Solvent A | Solvent B      |
|----------|-------|-----------|----------------|
| 0.0      | 0.0   | Hexane    | 1:1 MTBE:EtOAc |
| 2.0      | 0.0   | Hexane    | 1:1 MTBE:EtOAc |
| 1.5      | 5.0   | Hexane    | 1:1 MTBE:EtOAc |
| 3.0      | 5.0   | Hexane    | 1:1 MTBE:EtOAc |
| 2.0      | 10.0  | Hexane    | 1:1 MTBE:EtOAc |
| 4.0      | 10.0  | Hexane    | 1:1 MTBE:EtOAc |
| 15.0     | 100.0 | Hexane    | 1:1 MTBE:EtOAc |
| 3.0      | 100.0 | Hexane    | 1:1 MTBE:EtOAc |
| 5.0      | 100.0 | Hexane    | 1:1 MTBE:EtOAc |

13 mm x 100 mm Tubes

Sample: ZZG-G-51

Rf+

Friday 04 September 2020 12:44PM

RediSep Column: Silica 4g  
Flow Rate: 18 ml/min  
Equilibration Volume: 33.6 ml  
Initial Waste: 0.0 ml  
Air Purge: 0.5 min  
Solvent A: Hexane  
Solvent B: 1:1 MTBE:EtOAc

Peak Tube Volume: Max.  
Non-Peak Tube Volume: Max.  
Loading Type: Solid  
Wavelength 1 (red): 254nm  
Peak Width: 30 sec  
Threshold: 0.20 AU  
Wavelength 2 (purple): 280nm

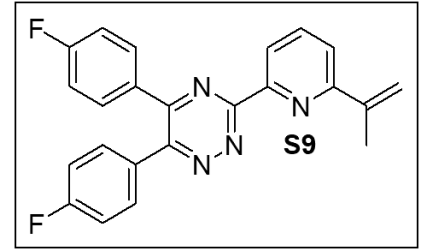

Run Notes:

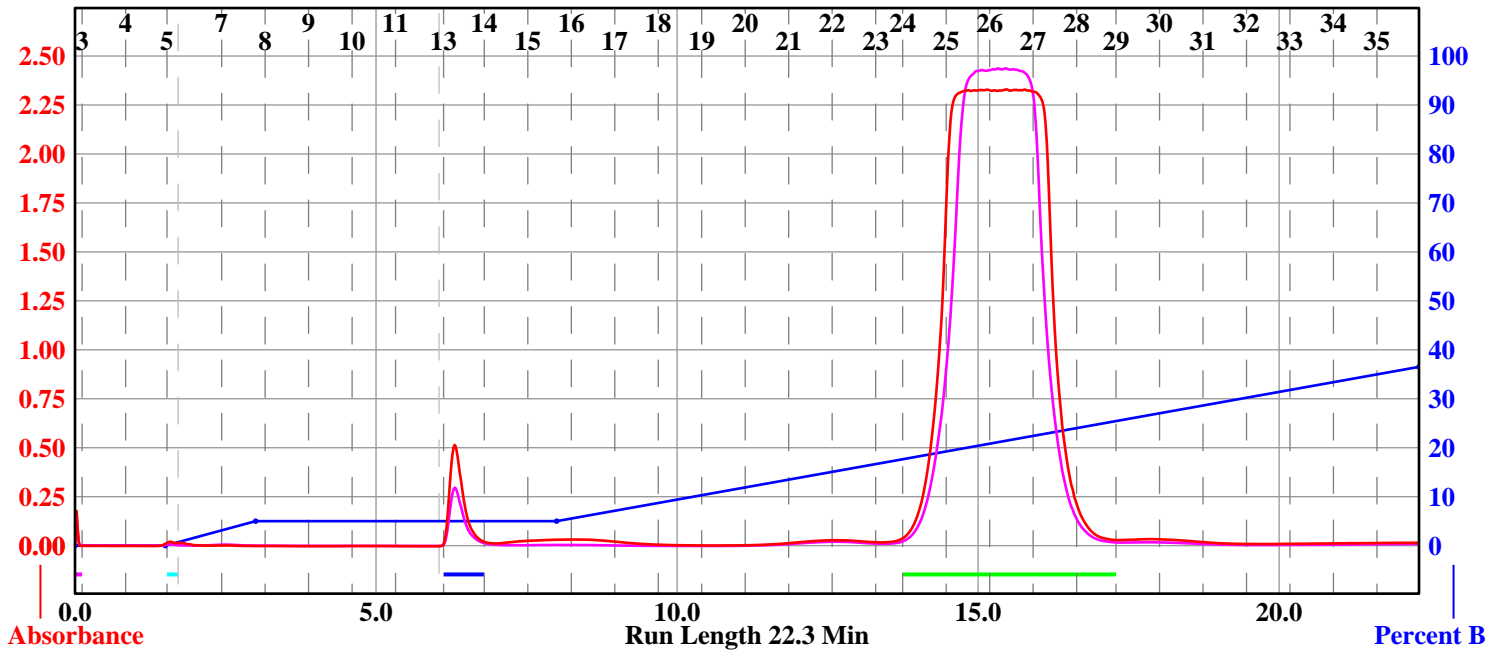

| Rack A |    |    |    |    |
|--------|----|----|----|----|
| 71     | 72 | 73 | 74 | 75 |
| 70     | 69 | 68 | 67 | 66 |
| 61     | 62 | 63 | 64 | 65 |
| 60     | 59 | 58 | 57 | 56 |
| 51     | 52 | 53 | 54 | 55 |
| 50     | 49 | 48 | 47 | 46 |
| 41     | 42 | 43 | 44 | 45 |
| 40     | 39 | 38 | 37 | 36 |
| 31     | 32 | 33 | 34 | 35 |
| 30     | 29 | 28 | 27 | 26 |
| 21     | 22 | 23 | 24 | 25 |
| 20     | 19 | 18 | 17 | 16 |
| 11     | 12 | 13 | 14 | 15 |
| 10     | 9  | 8  | 7  | 6  |
| 1      | 2  | 3  | 4  | 5  |

| Peak # | Start Tube | End Tube |
|--------|------------|----------|
| 1      | A:2        | A:2      |
| 2      | A:5        | A:5      |
| 3      | A:13       | A:13     |
| 4      | A:24       | A:28     |

| Duration | %B   | Solvent A | Solvent B      |
|----------|------|-----------|----------------|
| 0.0      | 0.0  | Hexane    | 1:1 MTBE:EtOAc |
| 1.5      | 0.0  | Hexane    | 1:1 MTBE:EtOAc |
| 1.5      | 5.0  | Hexane    | 1:1 MTBE:EtOAc |
| 5.0      | 5.0  | Hexane    | 1:1 MTBE:EtOAc |
| 14.3     | 36.5 | Hexane    | 1:1 MTBE:EtOAc |

16 mm x 100 mm Tubes

Sample: ZZG-G-11

Rf+

Friday 28 August 2020 07:42AM

RediSep Column: Silica 4g  
Flow Rate: 18 ml/min  
Equilibration Volume: 33.6 ml  
Initial Waste: 0.0 ml  
Air Purge: 0.5 min  
Solvent A: Hexane  
Solvent B: 1:1 MTBE:EtOAc

Peak Tube Volume: Max.  
Non-Peak Tube Volume: Max.  
Loading Type: Solid  
Wavelength 1 (red): 254nm  
Peak Width: 30 sec  
Threshold: 0.20 AU  
Wavelength 2 (purple): 280nm

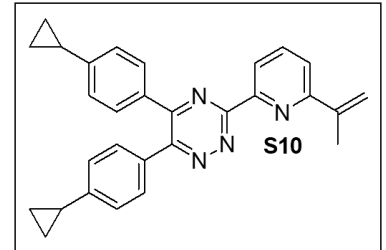

Run Notes:

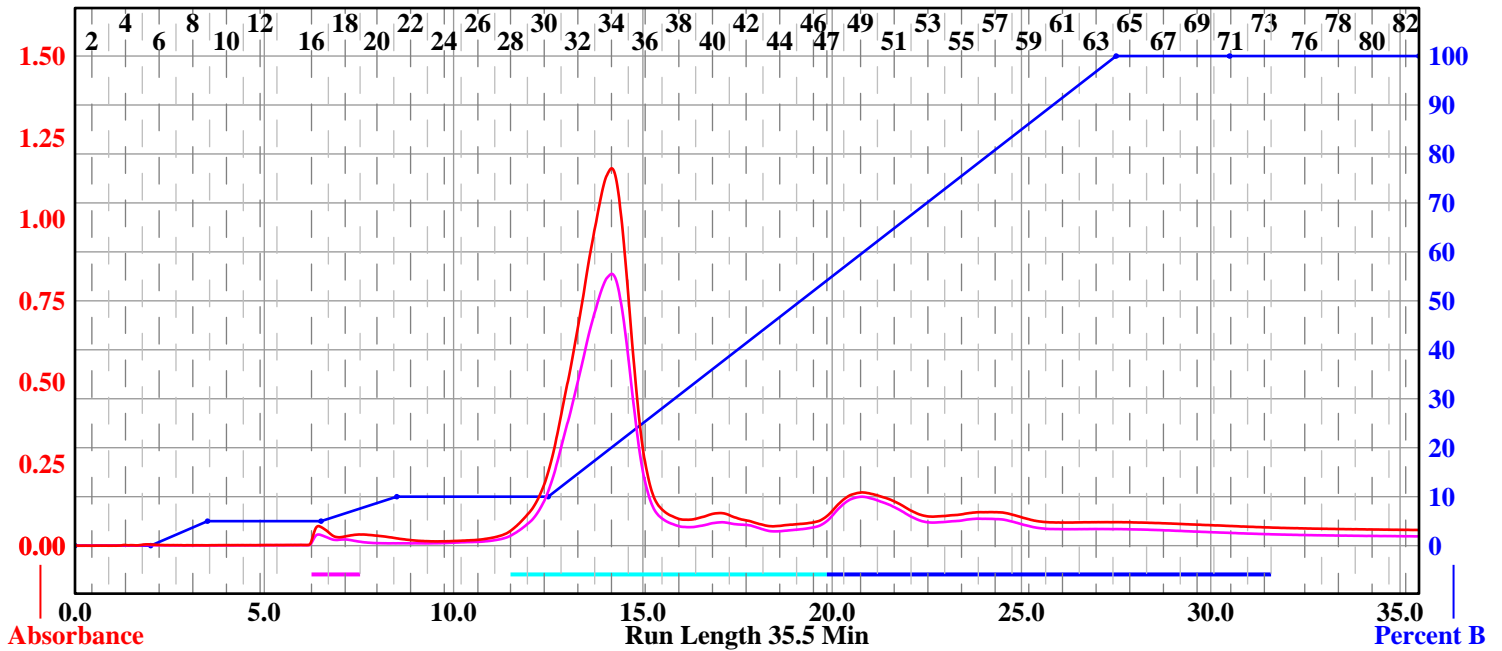

| Rack A |     |     |     |     |     |
|--------|-----|-----|-----|-----|-----|
| 108    | 107 | 106 | 105 | 104 | 103 |
| 97     | 98  | 99  | 100 | 101 | 102 |
| 96     | 95  | 94  | 93  | 92  | 91  |
| 85     | 86  | 87  | 88  | 89  | 90  |
| 84     | 83  | 82  | 81  | 80  | 79  |
| 73     | 74  | 75  | 76  | 77  | 78  |
| 62     | 61  | 60  | 59  | 58  | 57  |
| 51     | 50  | 49  | 48  | 47  | 46  |
| 40     | 39  | 38  | 37  | 36  | 35  |
| 39     | 38  | 37  | 36  | 35  | 34  |
| 25     | 26  | 27  | 28  | 29  | 30  |
| 24     | 23  | 22  | 21  | 20  | 19  |
| 13     | 14  | 15  | 16  | 17  | 18  |
| 12     | 11  | 10  | 9   | 8   | 7   |
| 1      | 2   | 3   | 4   | 5   | 6   |

| Peak # | Start Tube | End Tube |
|--------|------------|----------|
| 1      | A:16       | A:18     |
| 2      | A:28       | A:46     |
| 3      | A:47       | A:73     |

| Duration | %B    | Solvent A | Solvent B      |
|----------|-------|-----------|----------------|
| 0.0      | 0.0   | Hexane    | 1:1 MTBE:EtOAc |
| 2.0      | 0.0   | Hexane    | 1:1 MTBE:EtOAc |
| 1.5      | 5.0   | Hexane    | 1:1 MTBE:EtOAc |
| 3.0      | 5.0   | Hexane    | 1:1 MTBE:EtOAc |
| 2.0      | 10.0  | Hexane    | 1:1 MTBE:EtOAc |
| 4.0      | 10.0  | Hexane    | 1:1 MTBE:EtOAc |
| 15.0     | 100.0 | Hexane    | 1:1 MTBE:EtOAc |
| 3.0      | 100.0 | Hexane    | 1:1 MTBE:EtOAc |
| 5.0      | 100.0 | Hexane    | 1:1 MTBE:EtOAc |

13 mm x 100 mm Tubes

Sample: ZZG-G-61

Rf+

Wednesday 09 September 2020 06:15AM

RediSep Column: Silica 4g  
Flow Rate: 18 ml/min  
Equilibration Volume: 33.6 ml  
Initial Waste: 0.0 ml  
Air Purge: 1.0 min  
Solvent A: Hexane  
Solvent B: 1:1 MTBE:EtOAc

Peak Tube Volume: Max.  
Non-Peak Tube Volume: Max.  
Loading Type: Solid  
Wavelength 1 (red): 254nm  
Peak Width: 30 sec  
Threshold: 0.20 AU  
Wavelength 2 (purple): 280nm

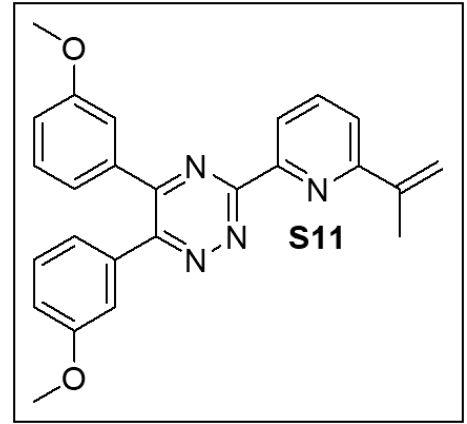

Run Notes:

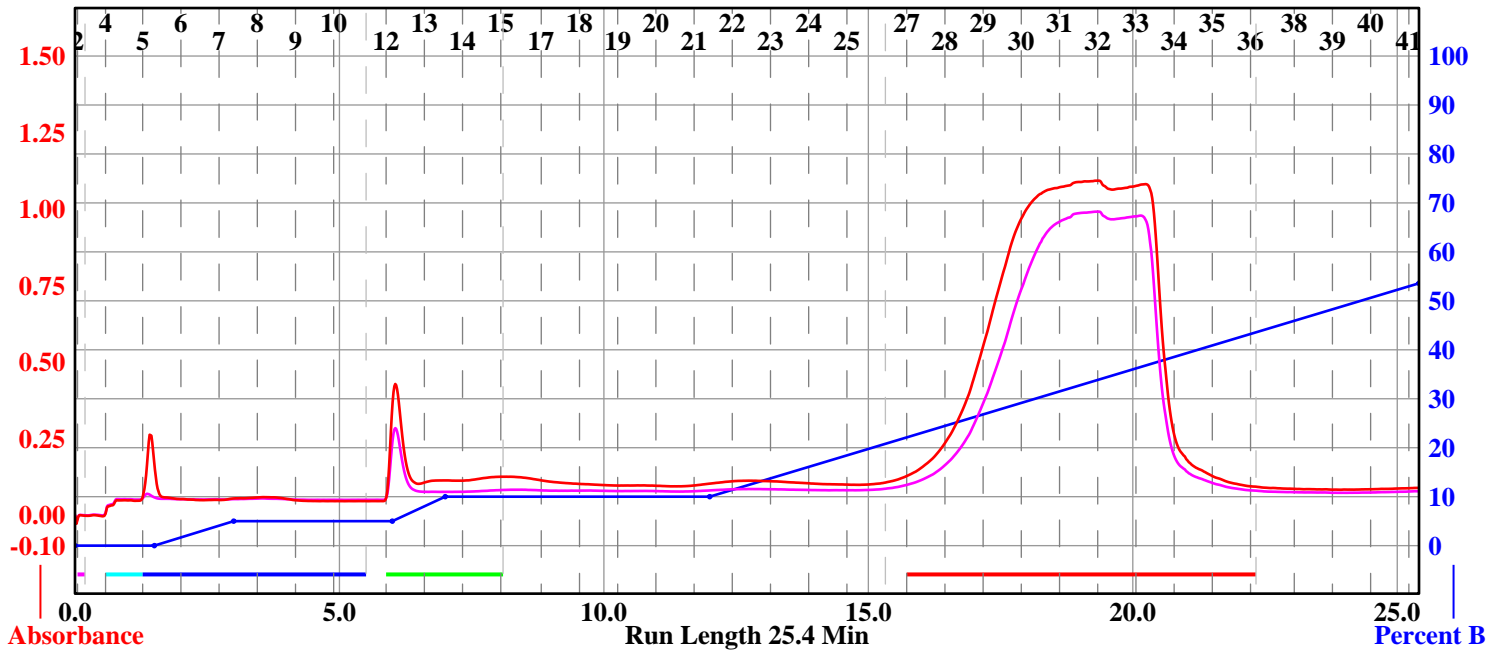

| Rack A |      |      |      |      | Peak # | Start Tube | End Tube |
|--------|------|------|------|------|--------|------------|----------|
| (71)   | (72) | (73) | (74) | (75) | 1      | A:2        | A:2      |
| (70)   | (69) | (68) | (67) | (66) | 2      | A:4        | A:4      |
| (61)   | (62) | (63) | (64) | (65) | 3      | A:5        | A:10     |
| (60)   | (59) | (58) | (57) | (56) | 4      | A:12       | A:15     |
| (51)   | (52) | (53) | (54) | (55) | 5      | A:27       | A:36     |
| (50)   | (49) | (48) | (47) | (46) |        |            |          |
| (41)   | (42) | (43) | (44) | (45) |        |            |          |
| (40)   | (39) | (38) | (37) | (36) |        |            |          |
| (31)   | (32) | (33) | (34) | (35) |        |            |          |
| (30)   | (29) | (28) | (27) | (26) |        |            |          |
| (21)   | (22) | (23) | (24) | (25) |        |            |          |
| (20)   | (19) | (18) | (17) | (16) |        |            |          |
| (11)   | (12) | (13) | (14) | (15) |        |            |          |
| (10)   | (9)  | (8)  | (7)  | (6)  |        |            |          |
| (1)    | (2)  | (3)  | (4)  | (5)  |        |            |          |

  

| Duration | %B   | Solvent A | Solvent B      |
|----------|------|-----------|----------------|
| 0.0      | 0.0  | Hexane    | 1:1 MTBE:EtOAc |
| 1.5      | 0.0  | Hexane    | 1:1 MTBE:EtOAc |
| 1.5      | 5.0  | Hexane    | 1:1 MTBE:EtOAc |
| 3.0      | 5.0  | Hexane    | 1:1 MTBE:EtOAc |
| 1.0      | 10.0 | Hexane    | 1:1 MTBE:EtOAc |
| 5.0      | 10.0 | Hexane    | 1:1 MTBE:EtOAc |
| 13.4     | 53.6 | Hexane    | 1:1 MTBE:EtOAc |

16 mm x 100 mm Tubes

Sample: ccp-a-71

Rf 200

Tuesday 15 June 2021 06:47AM

RediSep Column: Silica 12g  
 SN: E04150E8066AB Lot: 302224502X  
 Flow Rate: 30 ml/min  
 Equilibration Volume: 100.8 ml  
 Initial Waste: 0.0 ml  
 Air Purge: 0.5 min  
 Solvent: A1 Hexane  
 Solvent: B2 MTBE

Peak Tube Volume: Max.  
 Non-Peak Tube Volume: Max.  
 Loading Type: Solid  
 Wavelength 1 (red): 254nm  
 Peak Width: 1 min  
 Threshold: 0.20 AU  
 Wavelength 2 (purple): 280nm

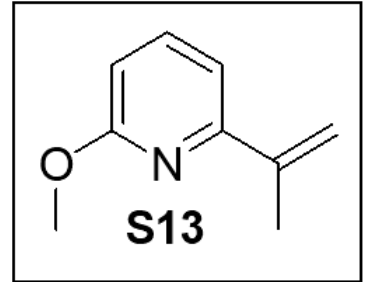

Run Notes:

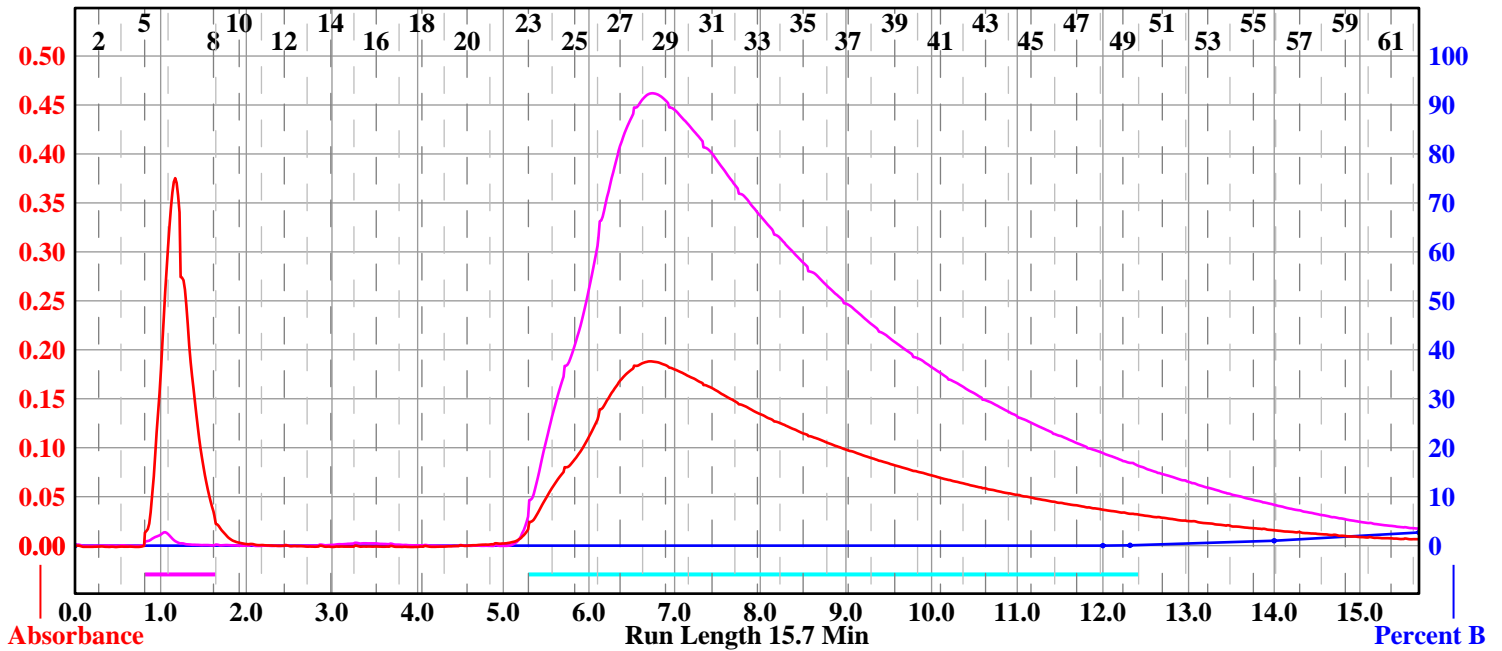

| Rack A |     |     |     |     |     |
|--------|-----|-----|-----|-----|-----|
| 108    | 107 | 106 | 105 | 104 | 103 |
| 97     | 98  | 99  | 100 | 101 | 102 |
| 96     | 95  | 94  | 93  | 92  | 91  |
| 85     | 86  | 87  | 88  | 89  | 90  |
| 84     | 83  | 82  | 81  | 80  | 79  |
| 73     | 74  | 75  | 76  | 77  | 78  |
| 72     | 71  | 70  | 69  | 68  | 67  |
| 61     | 62  | 63  | 64  | 65  | 66  |
| 60     | 59  | 58  | 57  | 56  | 55  |
| 49     | 50  | 51  | 52  | 53  | 54  |
| 48     | 47  | 46  | 45  | 44  | 43  |
| 37     | 38  | 39  | 40  | 41  | 42  |
| 36     | 35  | 34  | 33  | 32  | 31  |
| 25     | 26  | 27  | 28  | 29  | 30  |
| 24     | 23  | 22  | 21  | 20  | 19  |
| 13     | 14  | 15  | 16  | 17  | 18  |
| 12     | 11  | 10  | 9   | 8   | 7   |
| 1      | 2   | 3   | 4   | 5   | 6   |

| Peak # | Start Tube | End Tube |
|--------|------------|----------|
| 1      | A:5        | A:8      |
| 2      | A:23       | A:49     |

| Duration | %B  | Solvent A | Solvent B |
|----------|-----|-----------|-----------|
| 0.0      | 0.0 | A1 Hexane | B2 MTBE   |
| 12.0     | 0.0 | A1 Hexane | B2 MTBE   |
| 0.3      | 0.1 | A1 Hexane | B2 MTBE   |
| 1.7      | 1.0 | A1 Hexane | B2 MTBE   |
| 1.7      | 2.7 | A1 Hexane | B2 MTBE   |

13 mm x 100 mm Tubes

Sample: ccp-a-159

Rf 200

Thursday 23 September 2021 09:51AM

RediSep Column: Silica 4g  
Flow Rate: 18 ml/min  
Equilibration Volume: 33.6 ml  
Initial Waste: 0.0 ml  
Air Purge: 0.5 min  
Solvent: A1 Hexane  
Solvent: B2 MTBE

Peak Tube Volume: Max.  
Non-Peak Tube Volume: Max.  
Loading Type: Solid  
Wavelength 1 (red): 254nm  
Peak Width: 30 sec  
Threshold: 0.20 AU  
Wavelength 2 (purple): 280nm

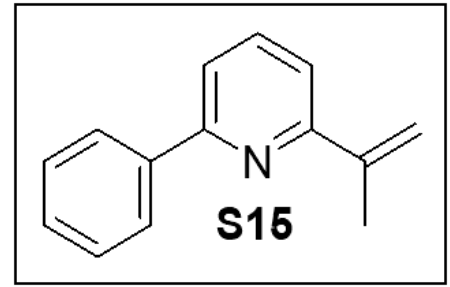

Run Notes:

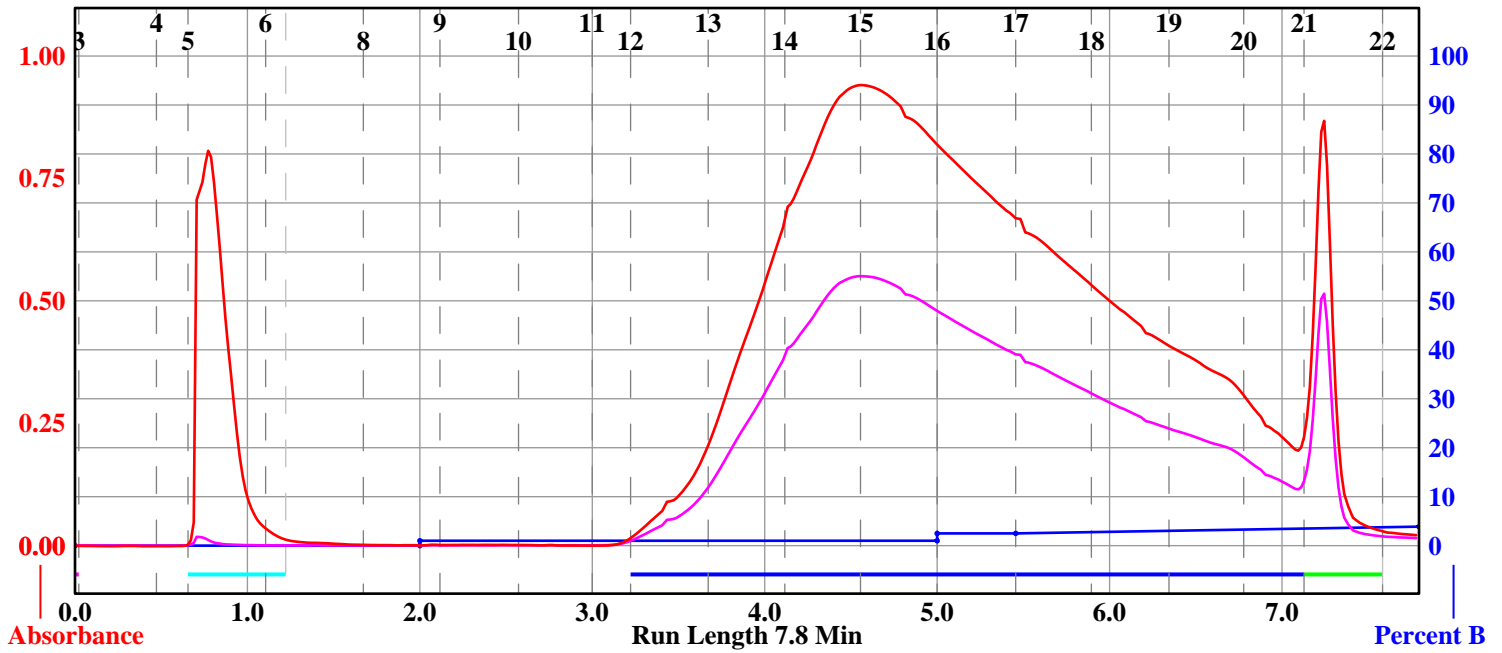

| Rack A |     |     |     |     |     | Peak # | Start Tube | End Tube |
|--------|-----|-----|-----|-----|-----|--------|------------|----------|
| 108    | 107 | 106 | 105 | 104 | 103 | 1      | A:2        | A:2      |
| 97     | 98  | 99  | 100 | 101 | 102 | 2      | A:5        | A:6      |
| 96     | 95  | 94  | 93  | 92  | 91  | 3      | A:12       | A:20     |
| 85     | 86  | 87  | 88  | 89  | 90  | 4      | A:21       | A:22     |
| 84     | 83  | 82  | 81  | 80  | 79  |        |            |          |
| 73     | 74  | 75  | 76  | 77  | 78  |        |            |          |
| 72     | 71  | 70  | 69  | 68  | 67  |        |            |          |
| 61     | 62  | 63  | 64  | 65  | 66  |        |            |          |
| 60     | 59  | 58  | 57  | 56  | 55  |        |            |          |
| 49     | 50  | 51  | 52  | 53  | 54  |        |            |          |
| 48     | 47  | 46  | 45  | 44  | 43  |        |            |          |
| 37     | 38  | 39  | 40  | 41  | 42  |        |            |          |
| 36     | 35  | 34  | 33  | 32  | 31  |        |            |          |
| 25     | 26  | 27  | 28  | 29  | 30  |        |            |          |
| 24     | 23  | 22  | 21  | 20  | 19  |        |            |          |
| 18     | 19  | 18  | 17  | 16  | 15  |        |            |          |
| 14     | 15  | 14  | 13  | 12  | 11  |        |            |          |
| 10     | 11  | 10  | 9   | 8   | 7   |        |            |          |
| 1      | 2   | 3   | 4   | 5   | 6   |        |            |          |

  

| Duration | %B  | Solvent A | Solvent B |
|----------|-----|-----------|-----------|
| 0.0      | 0.0 | A1 Hexane | B2 MTBE   |
| 2.0      | 0.0 | A1 Hexane | B2 MTBE   |
| 0.0      | 1.0 | A1 Hexane | B2 MTBE   |
| 3.0      | 1.0 | A1 Hexane | B2 MTBE   |
| 0.0      | 2.5 | A1 Hexane | B2 MTBE   |
| 0.5      | 2.5 | A1 Hexane | B2 MTBE   |
| 2.3      | 3.9 | A1 Hexane | B2 MTBE   |

13 mm x 100 mm Tubes



Sample: ccp-a-81

Rf 200

Thursday 24 June 2021 04:51AM

RediSep Column: Silica 4g  
Flow Rate: 18 ml/min  
Equilibration Volume: 33.6 ml  
Initial Waste: 0.0 ml  
Air Purge: 0.5 min  
Solvent: A1 Hexane  
Solvent: B2 MTBE

Peak Tube Volume: Max.  
Non-Peak Tube Volume: Max.  
Loading Type: Solid  
Wavelength 1 (red): 254nm  
Peak Width: 30 sec  
Threshold: 0.20 AU  
Wavelength 2 (purple): 280nm

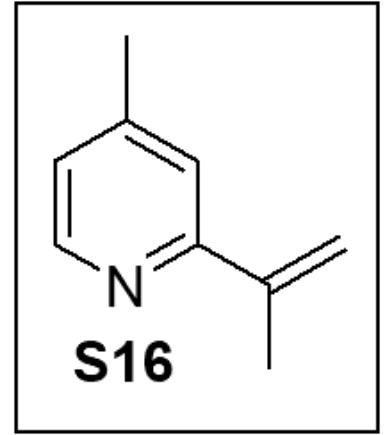

Run Notes:

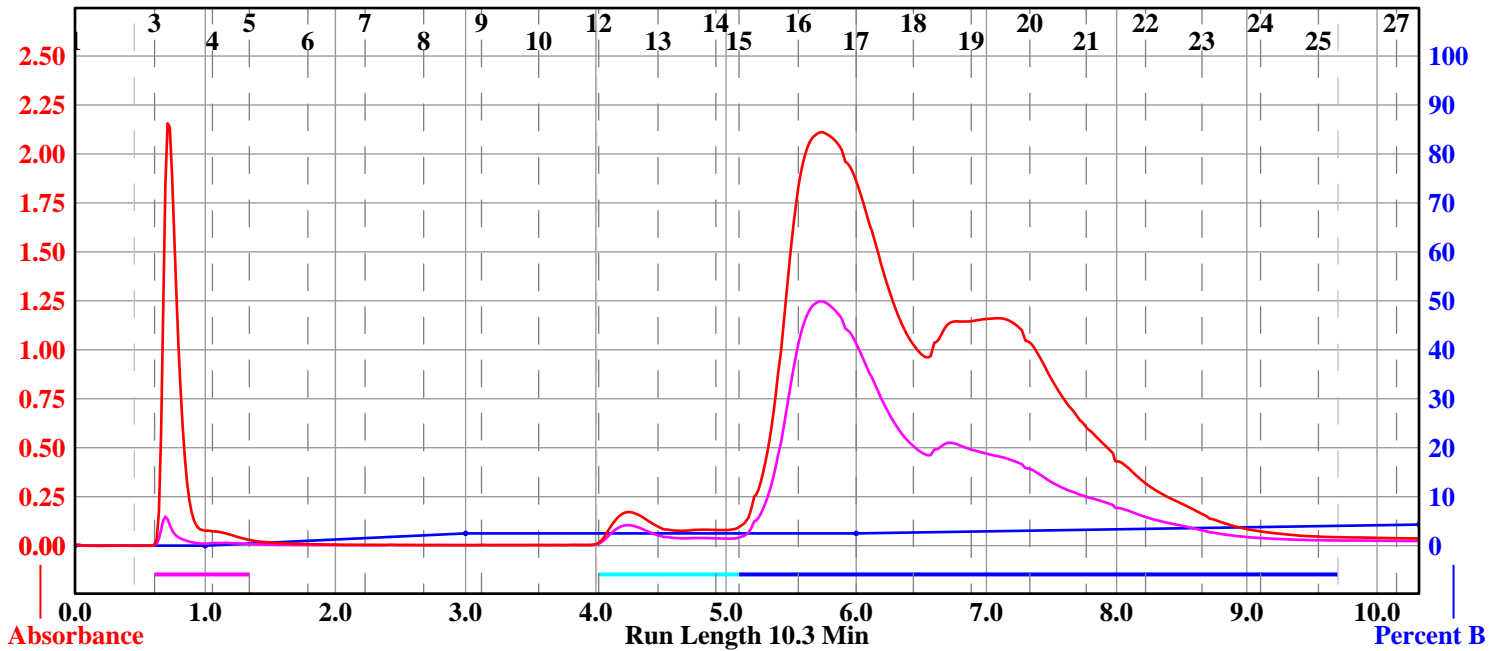

| Rack A |     |     |     |     |     |
|--------|-----|-----|-----|-----|-----|
| 108    | 107 | 106 | 105 | 104 | 103 |
| 97     | 98  | 99  | 100 | 101 | 102 |
| 96     | 95  | 94  | 93  | 92  | 91  |
| 85     | 86  | 87  | 88  | 89  | 90  |
| 84     | 83  | 82  | 81  | 80  | 79  |
| 73     | 74  | 75  | 76  | 77  | 78  |
| 72     | 71  | 70  | 69  | 68  | 67  |
| 61     | 62  | 63  | 64  | 65  | 66  |
| 60     | 59  | 58  | 57  | 56  | 55  |
| 49     | 50  | 51  | 52  | 53  | 54  |
| 48     | 47  | 46  | 45  | 44  | 43  |
| 37     | 38  | 39  | 40  | 41  | 42  |
| 36     | 35  | 34  | 33  | 32  | 31  |
| 25     | 26  | 27  | 28  | 29  | 30  |
| 14     | 15  | 16  | 17  | 18  | 19  |
| 13     | 12  | 11  | 10  | 9   | 8   |
| 12     | 11  | 10  | 9   | 8   | 7   |
| 1      | 2   | 3   | 4   | 5   | 6   |

| Peak # | Start Tube | End Tube |
|--------|------------|----------|
| 1      | A:3        | A:4      |
| 2      | A:12       | A:14     |
| 3      | A:15       | A:25     |

| Duration | %B  | Solvent A | Solvent B |
|----------|-----|-----------|-----------|
| 0.0      | 0.0 | A1 Hexane | B2 MTBE   |
| 1.0      | 0.0 | A1 Hexane | B2 MTBE   |
| 0.0      | 0.0 | A1 Hexane | B2 MTBE   |
| 2.0      | 2.5 | A1 Hexane | B2 MTBE   |
| 3.0      | 2.5 | A1 Hexane | B2 MTBE   |
| 4.3      | 4.3 | A1 Hexane | B2 MTBE   |

13 mm x 100 mm Tubes

RediSep Column: Silica 12g  
 SN: E04150E63D749A Lot: 311537906Z  
 Flow Rate: 30 ml/min  
 Equilibration Volume: 100.8 ml  
 Initial Waste: 0.0 ml  
 Air Purge: 0.5 min  
 Solvent: A1 Hexane  
 Solvent: B1 Ethyl Acetate

Peak Tube Volume: Max.  
 Non-Peak Tube Volume: Max.  
 Loading Type: Solid  
 Wavelength 1 (red): 254nm  
 Peak Width: 1 min  
 Threshold: 0.20 AU  
 Wavelength 2 (purple): 280nm

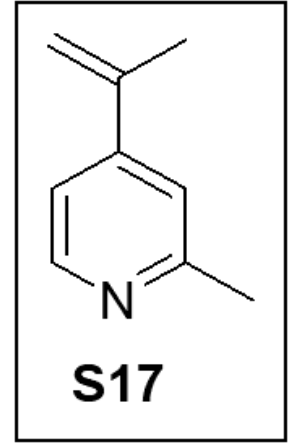

Run Notes:

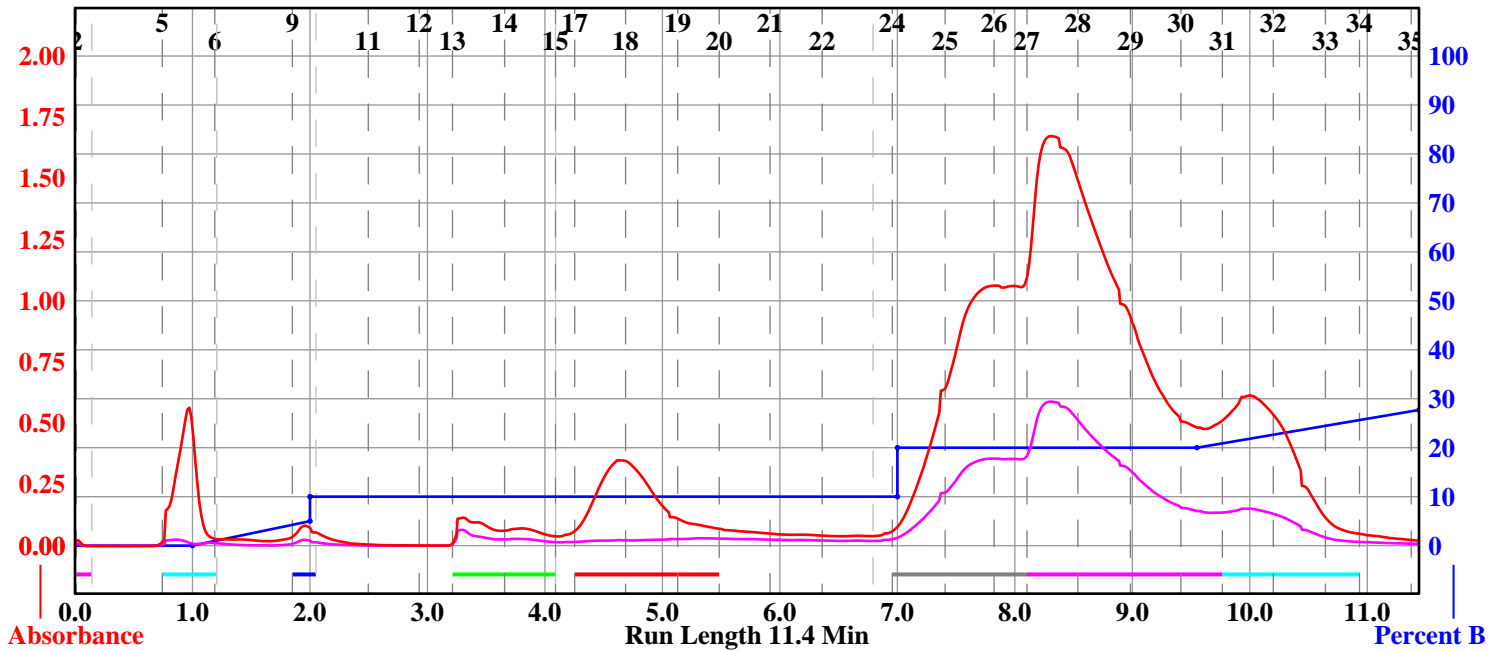

| Rack A |    |    |    |    |
|--------|----|----|----|----|
| 71     | 72 | 73 | 74 | 75 |
| 70     | 69 | 68 | 67 | 66 |
| 61     | 62 | 63 | 64 | 65 |
| 60     | 59 | 58 | 57 | 56 |
| 51     | 52 | 53 | 54 | 55 |
| 50     | 49 | 48 | 47 | 46 |
| 41     | 42 | 43 | 44 | 45 |
| 40     | 39 | 38 | 37 | 36 |
| 31     | 32 | 33 | 34 | 35 |
| 30     | 29 | 28 | 27 | 26 |
| 21     | 22 | 23 | 24 | 25 |
| 20     | 19 | 18 | 17 | 16 |
| 11     | 12 | 13 | 14 | 15 |
| 10     | 9  | 8  | 7  | 6  |
| 1      | 2  | 3  | 4  | 5  |

| Peak # | Start Tube | End Tube |
|--------|------------|----------|
| 1      | A:2        | A:2      |
| 2      | A:5        | A:6      |
| 3      | A:9        | A:9      |
| 4      | A:13       | A:15     |
| 5      | A:17       | A:19     |
| 6      | A:24       | A:26     |
| 7      | A:27       | A:30     |
| 8      | A:31       | A:33     |

| Duration | %B   | Solvent A | Solvent B        |
|----------|------|-----------|------------------|
| 0.0      | 0.0  | A1 Hexane | B1 Ethyl Acetate |
| 1.0      | 0.0  | A1 Hexane | B1 Ethyl Acetate |
| 1.0      | 5.0  | A1 Hexane | B1 Ethyl Acetate |
| 0.0      | 10.0 | A1 Hexane | B1 Ethyl Acetate |
| 5.0      | 10.0 | A1 Hexane | B1 Ethyl Acetate |
| 0.0      | 20.0 | A1 Hexane | B1 Ethyl Acetate |
| 2.5      | 20.0 | A1 Hexane | B1 Ethyl Acetate |
| 1.9      | 27.7 | A1 Hexane | B1 Ethyl Acetate |

16 mm x 100 mm Tubes

Sample: ccp-a-163

Rf 200

Thursday 14 October 2021 09:40AM

RediSep Column: Silica 4g  
Flow Rate: 18 ml/min  
Equilibration Volume: 33.6 ml  
Initial Waste: 0.0 ml  
Air Purge: 0.5 min  
Solvent: A1 pentane  
Solvent: B2 MTBE

Peak Tube Volume: Max.  
Non-Peak Tube Volume: Max.  
Loading Type: Solid  
Wavelength 1 (red): 254nm  
Peak Width: 30 sec  
Threshold: 0.20 AU  
Wavelength 2 (purple): 280nm

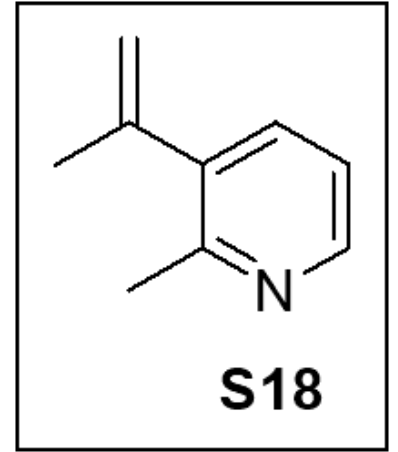

Run Notes:

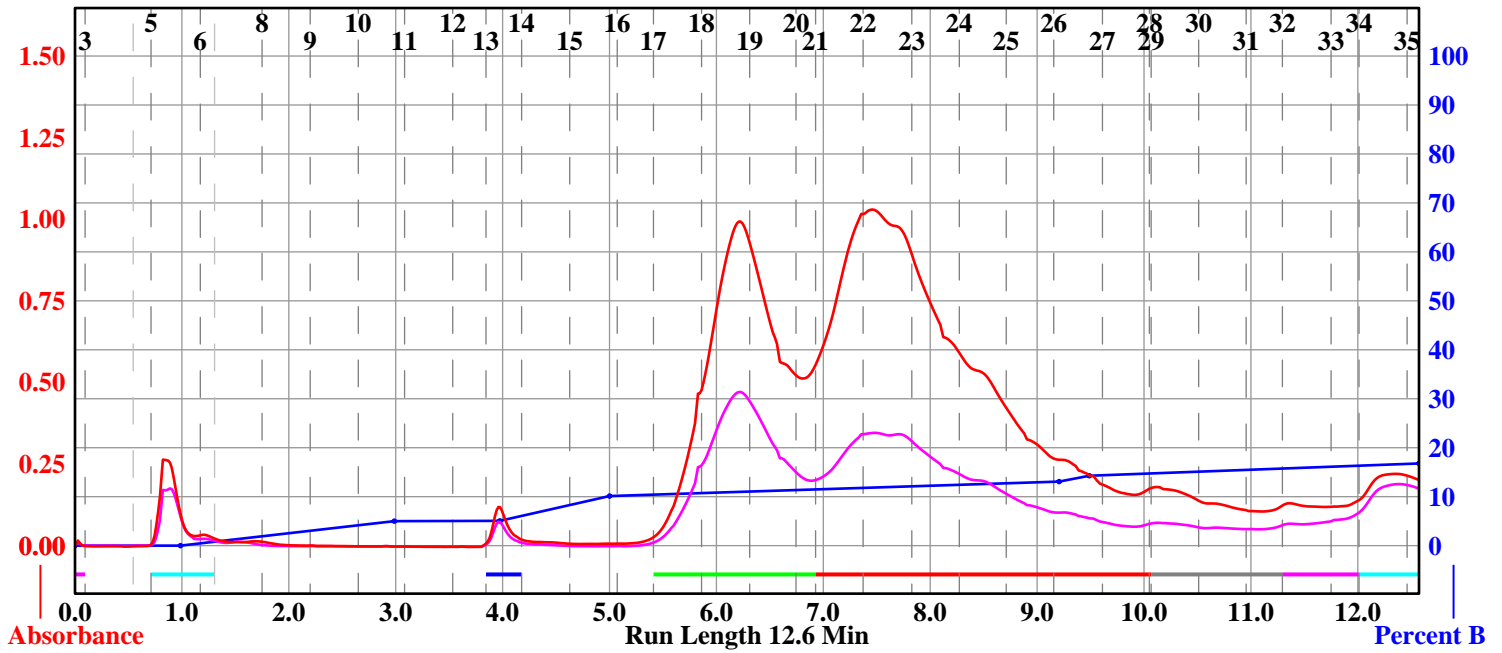

| Rack A |     |     |     |     |     |
|--------|-----|-----|-----|-----|-----|
| 108    | 107 | 106 | 105 | 104 | 103 |
| 97     | 98  | 99  | 100 | 101 | 102 |
| 96     | 95  | 94  | 93  | 92  | 91  |
| 85     | 86  | 87  | 88  | 89  | 90  |
| 84     | 83  | 82  | 81  | 80  | 79  |
| 73     | 74  | 75  | 76  | 77  | 78  |
| 72     | 71  | 70  | 69  | 68  | 67  |
| 61     | 62  | 63  | 64  | 65  | 66  |
| 60     | 59  | 58  | 57  | 56  | 55  |
| 49     | 50  | 51  | 52  | 53  | 54  |
| 48     | 47  | 46  | 45  | 44  | 43  |
| 37     | 38  | 39  | 40  | 41  | 42  |
| 36     | 35  | 34  | 33  | 32  | 31  |
| 25     | 26  | 27  | 28  | 29  | 30  |
| 24     | 23  | 22  | 21  | 20  | 19  |
| 13     | 14  | 15  | 16  | 17  | 18  |
| 12     | 11  | 10  | 9   | 8   | 7   |
| 1      | 2   | 3   | 4   | 5   | 6   |

| Peak # | Start Tube | End Tube |
|--------|------------|----------|
| 1      | A:2        | A:2      |
| 2      | A:5        | A:6      |
| 3      | A:13       | A:13     |
| 4      | A:17       | A:20     |
| 5      | A:21       | A:28     |
| 6      | A:29       | A:31     |
| 7      | A:32       | A:33     |
| 8      | A:34       | A:1      |

| Duration | %B   | Solvent A  | Solvent B |
|----------|------|------------|-----------|
| 0.0      | 0.0  | A1 pentane | B2 MTBE   |
| 1.0      | 0.0  | A1 pentane | B2 MTBE   |
| 2.0      | 5.0  | A1 pentane | B2 MTBE   |
| 1.0      | 5.1  | A1 pentane | B2 MTBE   |
| 1.0      | 10.1 | A1 pentane | B2 MTBE   |
| 4.2      | 13.1 | A1 pentane | B2 MTBE   |
| 0.3      | 14.3 | A1 pentane | B2 MTBE   |
| 3.1      | 16.8 | A1 pentane | B2 MTBE   |

13 mm x 100 mm Tubes

RediSep Column: Silica 24g  
 SN: E04150D74CBF37 Lot: 301334205X  
 Flow Rate: 35 ml/min  
 Equilibration Volume: 168.0 ml  
 Initial Waste: 0.0 ml  
 Air Purge: 1.0 min  
 Solvent: A1 Hexane  
 Solvent: B1 MTBE

Peak Tube Volume: Max.  
 Non-Peak Tube Volume: Max.  
 Loading Type: Solid  
 Wavelength 1 (red): 254nm  
 Peak Width: 1 min  
 Threshold: 0.20 AU  
 Wavelength 2 (purple): 280nm

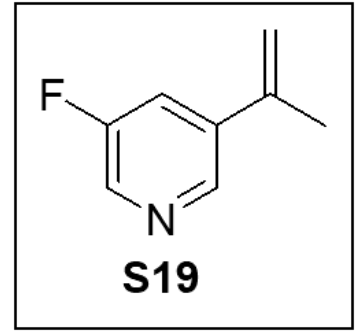

Run Notes:

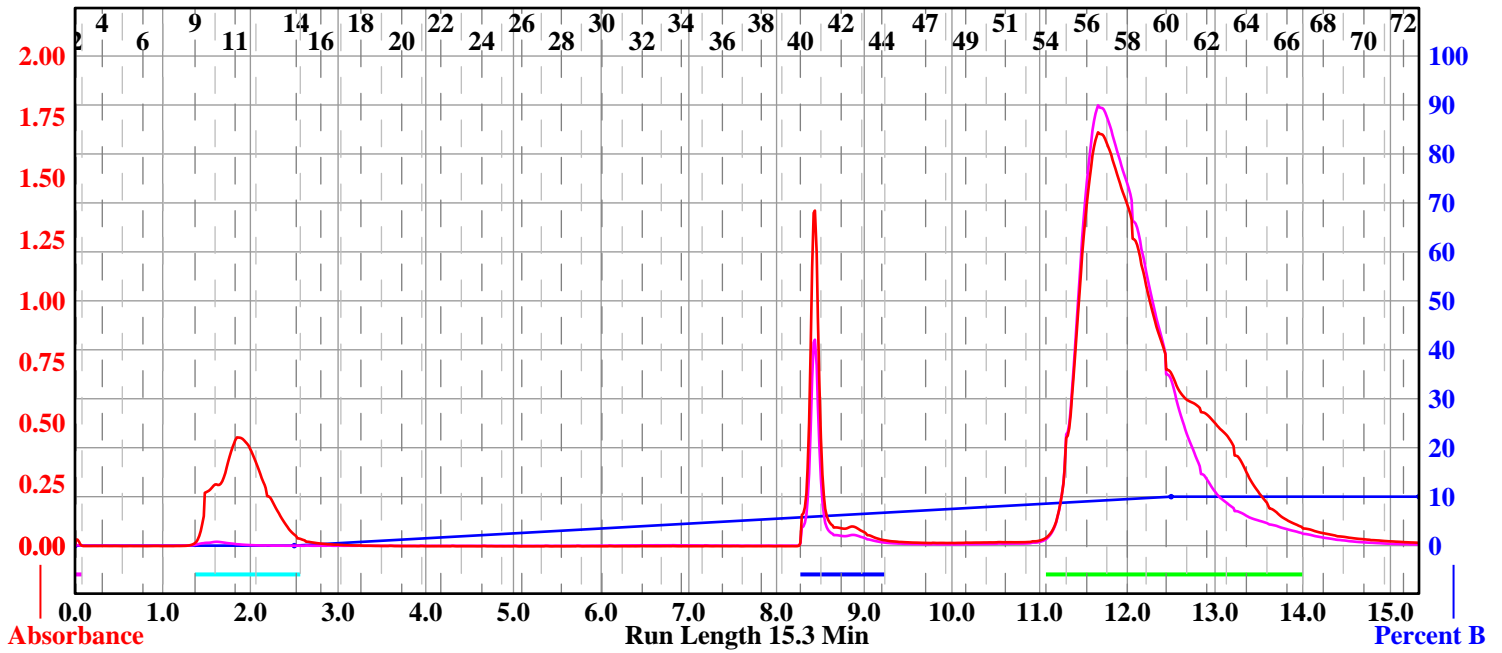

| Rack A |     |     |     |     |     |
|--------|-----|-----|-----|-----|-----|
| 108    | 107 | 106 | 105 | 104 | 103 |
| 97     | 98  | 99  | 100 | 101 | 102 |
| 96     | 95  | 94  | 93  | 92  | 91  |
| 85     | 86  | 87  | 88  | 89  | 90  |
| 84     | 83  | 82  | 81  | 80  | 79  |
| 73     | 74  | 75  | 76  | 77  | 78  |
| 72     | 71  | 70  | 69  | 68  | 67  |
| 66     | 65  | 64  | 63  | 62  | 61  |
| 60     | 59  | 58  | 57  | 56  | 55  |
| 49     | 50  | 51  | 52  | 53  | 54  |
| 48     | 47  | 46  | 45  | 44  | 43  |
| 37     | 38  | 39  | 40  | 41  | 42  |
| 36     | 35  | 34  | 33  | 32  | 31  |
| 25     | 26  | 27  | 28  | 29  | 30  |
| 24     | 23  | 22  | 21  | 20  | 19  |
| 13     | 14  | 15  | 16  | 17  | 18  |
| 12     | 11  | 10  | 9   | 8   | 7   |
| 1      | 2   | 3   | 4   | 5   | 6   |

| Peak # | Start Tube | End Tube |
|--------|------------|----------|
| 1      | A:2        | A:2      |
| 2      | A:9        | A:14     |
| 3      | A:40       | A:44     |
| 4      | A:54       | A:66     |

| Duration | %B   | Solvent A | Solvent B |
|----------|------|-----------|-----------|
| 0.0      | 0.0  | A1 Hexane | B1 MTBE   |
| 2.5      | 0.0  | A1 Hexane | B1 MTBE   |
| 10.0     | 10.0 | A1 Hexane | B1 MTBE   |
| 2.8      | 10.0 | A1 Hexane | B1 MTBE   |

13 mm x 100 mm Tubes

Sample: ccp-a-55

Rf 200

Thursday 03 June 2021 07:00AM

RediSep Column: Silica 12g  
 SN: E04150E8067D5 Lot: 302224502X  
 Flow Rate: 30 ml/min  
 Equilibration Volume: 100.8 ml  
 Initial Waste: 0.0 ml  
 Air Purge: 0.5 min  
 Solvent: A1 Hexane  
 Solvent: B1 Ethyl Acetate

Peak Tube Volume: Max.  
 Non-Peak Tube Volume: Max.  
 Loading Type: Solid  
 Wavelength 1 (red): 254nm  
 Peak Width: 1 min  
 Threshold: 0.20 AU  
 Wavelength 2 (purple): 280nm

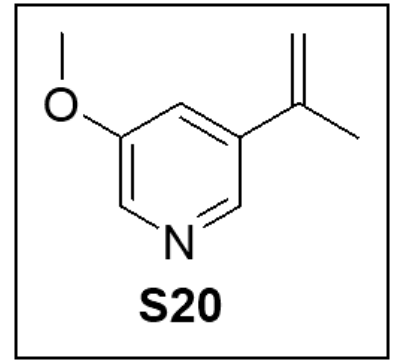

Run Notes:

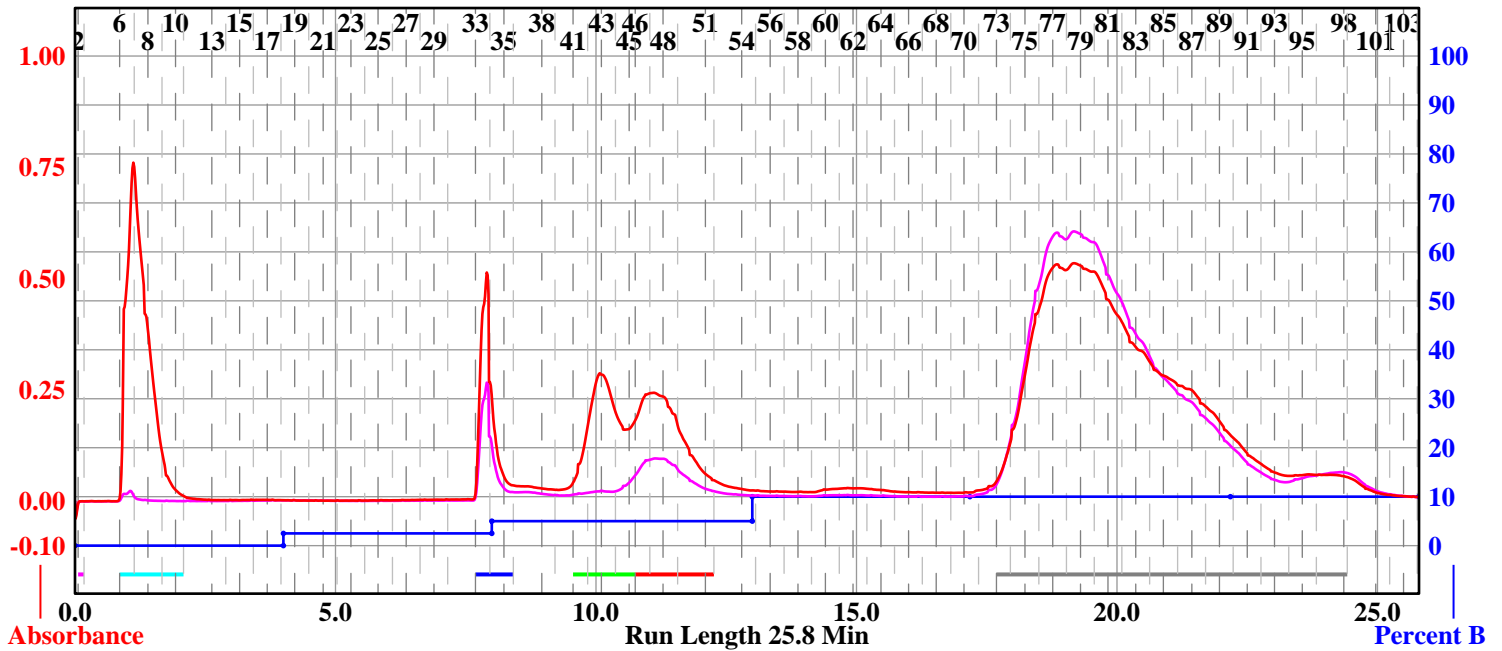

| Rack A |     |     |     |     |     |
|--------|-----|-----|-----|-----|-----|
| 108    | 107 | 106 | 105 | 104 | 103 |
| 97     | 98  | 99  | 100 | 101 | 102 |
| 96     | 95  | 94  | 93  | 92  | 91  |
| 85     | 86  | 87  | 88  | 89  | 90  |
| 84     | 83  | 82  | 81  | 80  | 79  |
| 76     | 74  | 75  | 76  | 77  | 78  |
| 72     | 71  | 70  | 69  | 68  | 67  |
| 61     | 62  | 63  | 64  | 65  | 66  |
| 60     | 59  | 58  | 57  | 56  | 55  |
| 48     | 49  | 50  | 52  | 53  | 54  |
| 48     | 47  | 46  | 45  | 44  | 43  |
| 37     | 38  | 39  | 40  | 41  | 42  |
| 36     | 35  | 34  | 33  | 32  | 31  |
| 25     | 26  | 27  | 28  | 29  | 30  |
| 24     | 23  | 22  | 21  | 20  | 19  |
| 13     | 14  | 15  | 16  | 17  | 18  |
| 12     | 11  | 10  | 9   | 8   | 7   |
| 1      | 2   | 3   | 4   | 5   | 6   |

| Peak # | Start Tube | End Tube |
|--------|------------|----------|
| 1      | A:2        | A:2      |
| 2      | A:6        | A:10     |
| 3      | A:33       | A:35     |
| 4      | A:41       | A:45     |
| 5      | A:46       | A:51     |
| 6      | A:73       | A:98     |

| Duration | %B   | Solvent A | Solvent B        |
|----------|------|-----------|------------------|
| 0.0      | 0.0  | A1 Hexane | B1 Ethyl Acetate |
| 4.0      | 0.0  | A1 Hexane | B1 Ethyl Acetate |
| 0.0      | 2.5  | A1 Hexane | B1 Ethyl Acetate |
| 4.0      | 2.5  | A1 Hexane | B1 Ethyl Acetate |
| 0.0      | 5.0  | A1 Hexane | B1 Ethyl Acetate |
| 5.0      | 5.0  | A1 Hexane | B1 Ethyl Acetate |
| 0.0      | 10.0 | A1 Hexane | B1 Ethyl Acetate |
| 4.2      | 10.0 | A1 Hexane | B1 Ethyl Acetate |
| 5.0      | 10.0 | A1 Hexane | B1 Ethyl Acetate |
| 3.6      | 10.0 | A1 Hexane | B1 Ethyl Acetate |

13 mm x 100 mm Tubes

Sample: ccp-a-93

Rf 200

Wednesday 07 July 2021 05:16AM

RediSep Column: Silica 4g  
Flow Rate: 18 ml/min  
Equilibration Volume: 33.6 ml  
Initial Waste: 0.0 ml  
Air Purge: 0.5 min  
Solvent: A1 Hexane  
Solvent: B2 MTBE

Peak Tube Volume: Max.  
Non-Peak Tube Volume: Max.  
Loading Type: Solid  
Wavelength 1 (red): 254nm  
Peak Width: 30 sec  
Threshold: 0.20 AU  
Wavelength 2 (purple): 280nm

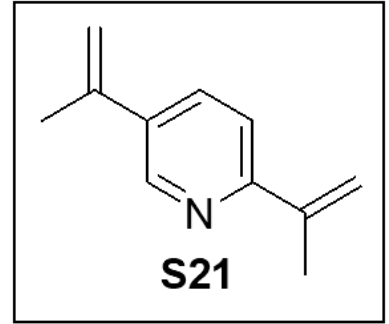

Run Notes:

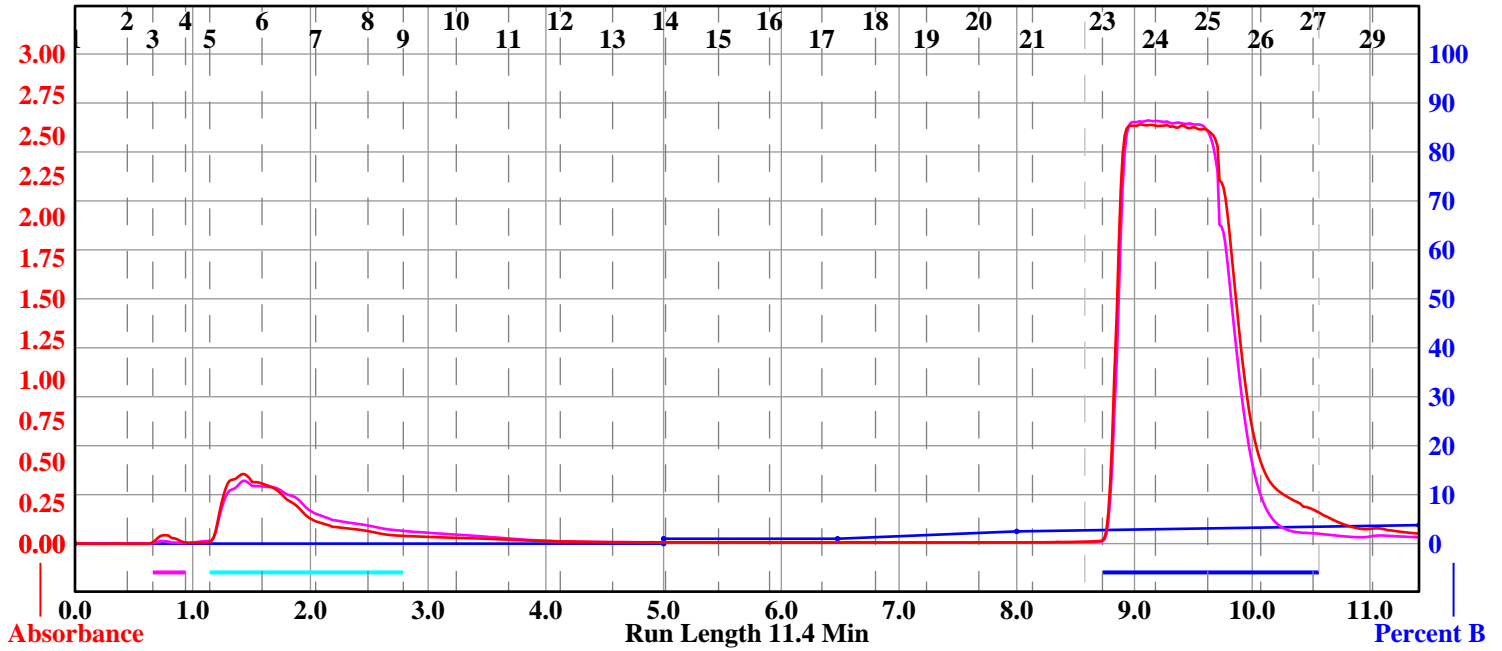

| Rack A |     |     |     |     |     |
|--------|-----|-----|-----|-----|-----|
| 108    | 107 | 106 | 105 | 104 | 103 |
| 97     | 98  | 99  | 100 | 101 | 102 |
| 96     | 95  | 94  | 93  | 92  | 91  |
| 85     | 86  | 87  | 88  | 89  | 90  |
| 84     | 83  | 82  | 81  | 80  | 79  |
| 73     | 74  | 75  | 76  | 77  | 78  |
| 72     | 71  | 70  | 69  | 68  | 67  |
| 61     | 62  | 63  | 64  | 65  | 66  |
| 60     | 59  | 58  | 57  | 56  | 55  |
| 49     | 50  | 51  | 52  | 53  | 54  |
| 48     | 47  | 46  | 45  | 44  | 43  |
| 37     | 38  | 39  | 40  | 41  | 42  |
| 36     | 35  | 34  | 33  | 32  | 31  |
| 25     | 26  | 27  | 28  | 29  | 30  |
| 24     | 23  | 22  | 21  | 20  | 19  |
| 13     | 14  | 15  | 16  | 17  | 18  |
| 12     | 11  | 10  | 9   | 8   | 7   |
| 1      | 2   | 3   | 4   | 5   | 6   |

| Peak # | Start Tube | End Tube |
|--------|------------|----------|
| 1      | A:3        | A:3      |
| 2      | A:5        | A:8      |
| 3      | A:23       | A:27     |

| Duration | %B  | Solvent A | Solvent B |
|----------|-----|-----------|-----------|
| 0.0      | 0.0 | A1 Hexane | B2 MTBE   |
| 5.0      | 0.0 | A1 Hexane | B2 MTBE   |
| 0.0      | 1.0 | A1 Hexane | B2 MTBE   |
| 1.5      | 1.0 | A1 Hexane | B2 MTBE   |
| 1.5      | 2.5 | A1 Hexane | B2 MTBE   |
| 3.4      | 3.8 | A1 Hexane | B2 MTBE   |

13 mm x 100 mm Tubes

Sample: ccp-a-101

Rf 200

Wednesday 14 July 2021 05:35AM

RediSep Column: Silica 4g  
Flow Rate: 18 ml/min  
Equilibration Volume: 33.6 ml  
Initial Waste: 0.0 ml  
Air Purge: 0.5 min  
Solvent: A1 Hexane  
Solvent: B2 MTBE

Peak Tube Volume: Max.  
Non-Peak Tube Volume: Max.  
Loading Type: Solid  
Wavelength 1 (red): 254nm  
Peak Width: 30 sec  
Threshold: 0.20 AU  
Wavelength 2 (purple): 280nm

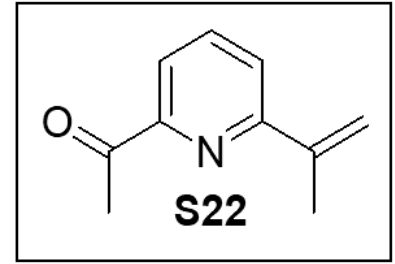

Run Notes:

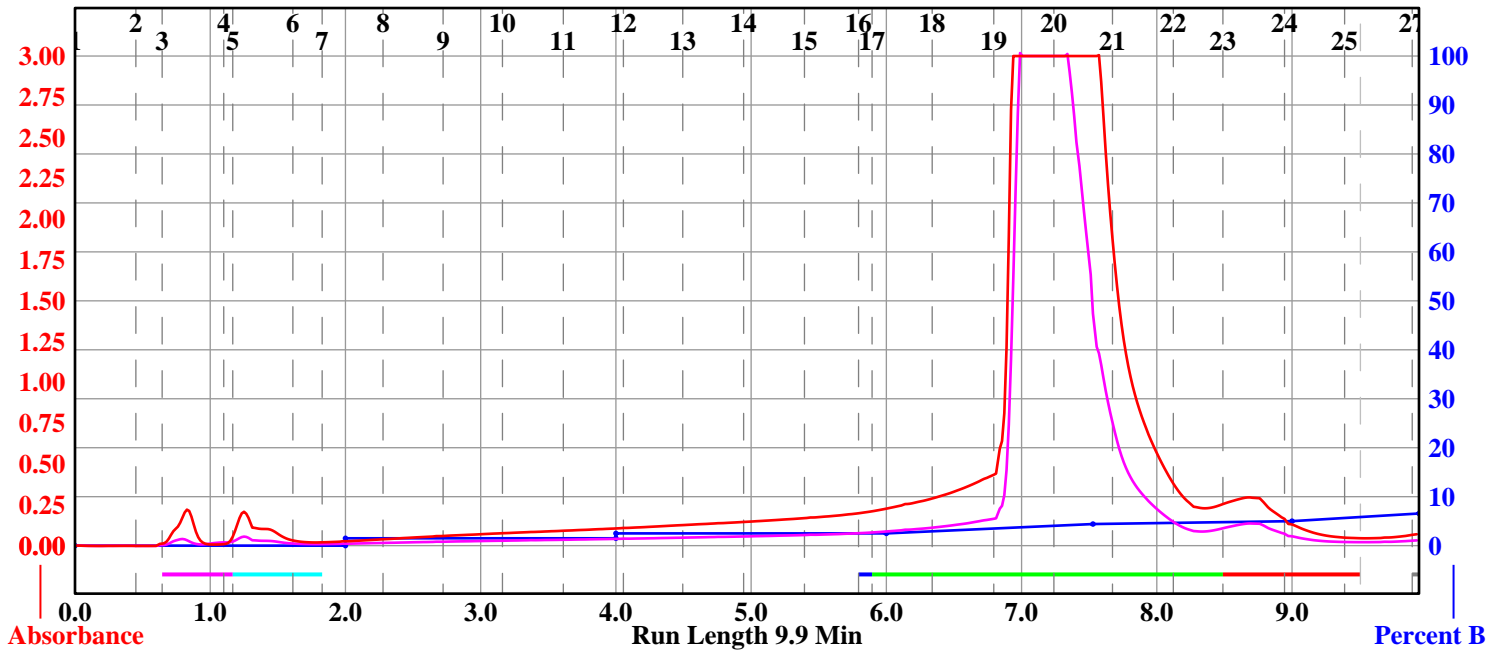

| Rack A |     |     |     |     |     |
|--------|-----|-----|-----|-----|-----|
| 108    | 107 | 106 | 105 | 104 | 103 |
| 97     | 98  | 99  | 100 | 101 | 102 |
| 96     | 95  | 94  | 93  | 92  | 91  |
| 85     | 86  | 87  | 88  | 89  | 90  |
| 84     | 83  | 82  | 81  | 80  | 79  |
| 73     | 74  | 75  | 76  | 77  | 78  |
| 72     | 71  | 70  | 69  | 68  | 67  |
| 61     | 62  | 63  | 64  | 65  | 66  |
| 60     | 59  | 58  | 57  | 56  | 55  |
| 49     | 50  | 51  | 52  | 53  | 54  |
| 48     | 47  | 46  | 45  | 44  | 43  |
| 37     | 38  | 39  | 40  | 41  | 42  |
| 36     | 35  | 34  | 33  | 32  | 31  |
| 25     | 26  | 27  | 28  | 29  | 30  |
| 14     | 13  | 12  | 11  | 10  | 9   |
| 13     | 14  | 15  | 16  | 17  | 18  |
| 12     | 11  | 10  | 9   | 8   | 7   |
| 1      | 2   | 3   | 4   | 5   | 6   |

| Peak # | Start Tube | End Tube |
|--------|------------|----------|
| 1      | A:3        | A:4      |
| 2      | A:5        | A:6      |
| 3      | A:16       | A:16     |
| 4      | A:17       | A:22     |
| 5      | A:23       | A:25     |
| 6      | A:27       | A:27     |

| Duration | %B  | Solvent A | Solvent B |
|----------|-----|-----------|-----------|
| 0.0      | 0.0 | A1 Hexane | B2 MTBE   |
| 2.0      | 0.0 | A1 Hexane | B2 MTBE   |
| 0.0      | 1.5 | A1 Hexane | B2 MTBE   |
| 2.0      | 1.5 | A1 Hexane | B2 MTBE   |
| 0.0      | 2.5 | A1 Hexane | B2 MTBE   |
| 2.0      | 2.5 | A1 Hexane | B2 MTBE   |
| 1.5      | 4.4 | A1 Hexane | B2 MTBE   |
| 1.5      | 5.0 | A1 Hexane | B2 MTBE   |
| 0.9      | 6.6 | A1 Hexane | B2 MTBE   |

13 mm x 100 mm Tubes

Sample: ccp-a-95

Rf 200

Wednesday 07 July 2021 10:12AM

RediSep Column: Silica 4g  
Flow Rate: 18 ml/min  
Equilibration Volume: 33.6 ml  
Initial Waste: 0.0 ml  
Air Purge: 0.5 min  
Solvent: A1 Hexane  
Solvent: B2 MTBE

Peak Tube Volume: Max.  
Non-Peak Tube Volume: Max.  
Loading Type: Solid  
Wavelength 1 (red): 254nm  
Peak Width: 30 sec  
Threshold: 0.20 AU  
Wavelength 2 (purple): 280nm

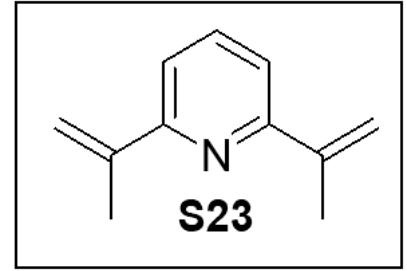

Run Notes: 2,6-Diisopropenyl-pyridine (S24)

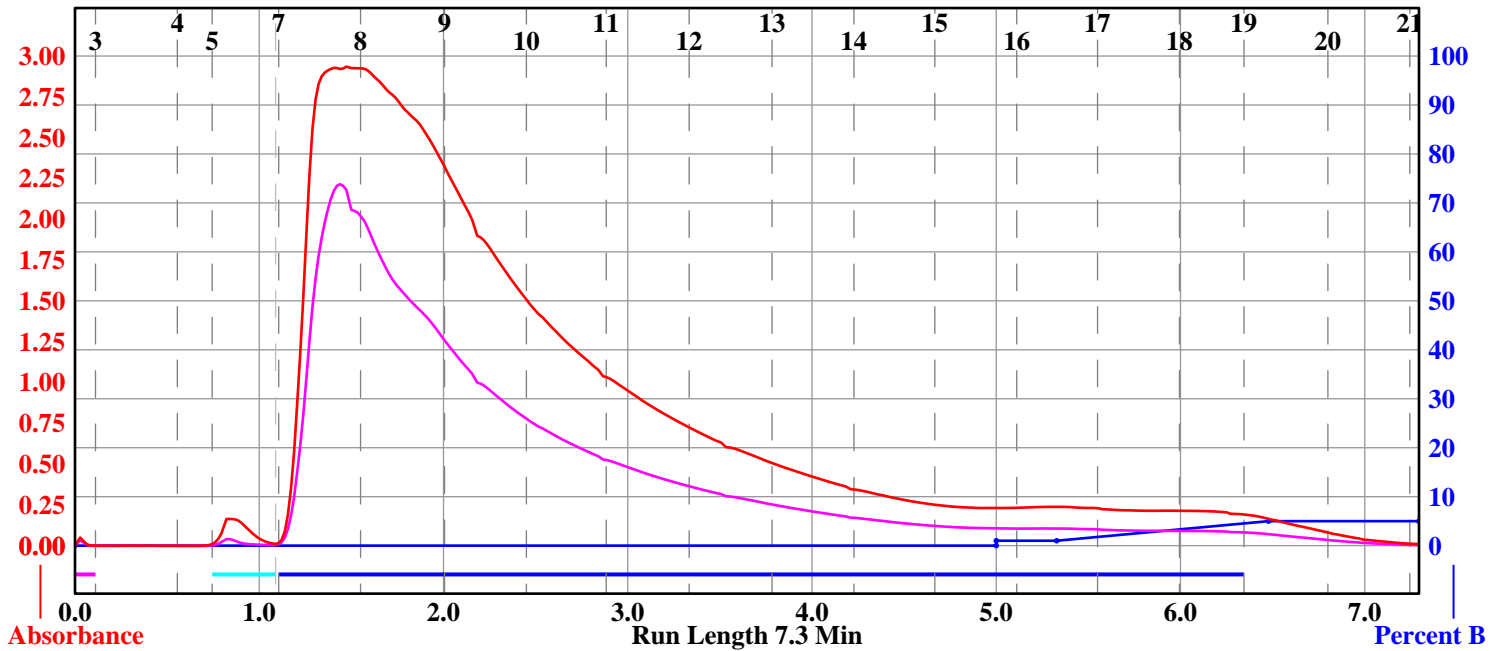

| Rack A |     |     |     |     |     |
|--------|-----|-----|-----|-----|-----|
| 108    | 107 | 106 | 105 | 104 | 103 |
| 97     | 98  | 99  | 100 | 101 | 102 |
| 96     | 95  | 94  | 93  | 92  | 91  |
| 85     | 86  | 87  | 88  | 89  | 90  |
| 84     | 83  | 82  | 81  | 80  | 79  |
| 73     | 74  | 75  | 76  | 77  | 78  |
| 72     | 71  | 70  | 69  | 68  | 67  |
| 61     | 62  | 63  | 64  | 65  | 66  |
| 60     | 59  | 58  | 57  | 56  | 55  |
| 49     | 50  | 51  | 52  | 53  | 54  |
| 48     | 47  | 46  | 45  | 44  | 43  |
| 37     | 38  | 39  | 40  | 41  | 42  |
| 36     | 35  | 34  | 33  | 32  | 31  |
| 25     | 26  | 27  | 28  | 29  | 30  |
| 24     | 23  | 22  | 21  | 20  | 19  |
| 13     | 14  | 15  | 16  | 17  | 18  |
| 7      | 8   | 9   | 10  | 11  | 12  |
| 1      | 2   | 3   | 4   | 5   | 6   |

| Peak # | Start Tube | End Tube |
|--------|------------|----------|
| 1      | A:2        | A:2      |
| 2      | A:5        | A:5      |
| 3      | A:7        | A:18     |

| Duration | %B  | Solvent A | Solvent B |
|----------|-----|-----------|-----------|
| 0.0      | 0.0 | A1 Hexane | B2 MTBE   |
| 5.0      | 0.0 | A1 Hexane | B2 MTBE   |
| 0.0      | 1.0 | A1 Hexane | B2 MTBE   |
| 0.3      | 1.0 | A1 Hexane | B2 MTBE   |
| 1.2      | 5.0 | A1 Hexane | B2 MTBE   |
| 0.8      | 5.0 | A1 Hexane | B2 MTBE   |

13 mm x 100 mm Tubes



RediSep Column: Al2O3 pH=7 8g  
 Flow Rate: 18 ml/min  
 Equilibration Volume: 33.6 ml  
 Initial Waste: 0.0 ml  
 Air Purge: 0.5 min  
 Solvent: A1 Hexane  
 Solvent: B1 1:1 MTBE:EtOAc

Peak Tube Volume: Max.  
 Non-Peak Tube Volume: Max.  
 Loading Type: Solid  
 Wavelength 1 (red): 254nm  
 Peak Width: 30 sec  
 Threshold: 0.20 AU  
 Wavelength 2 (purple): 280nm

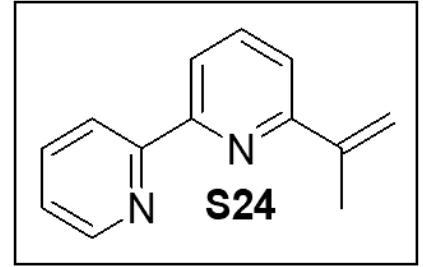

Run Notes:

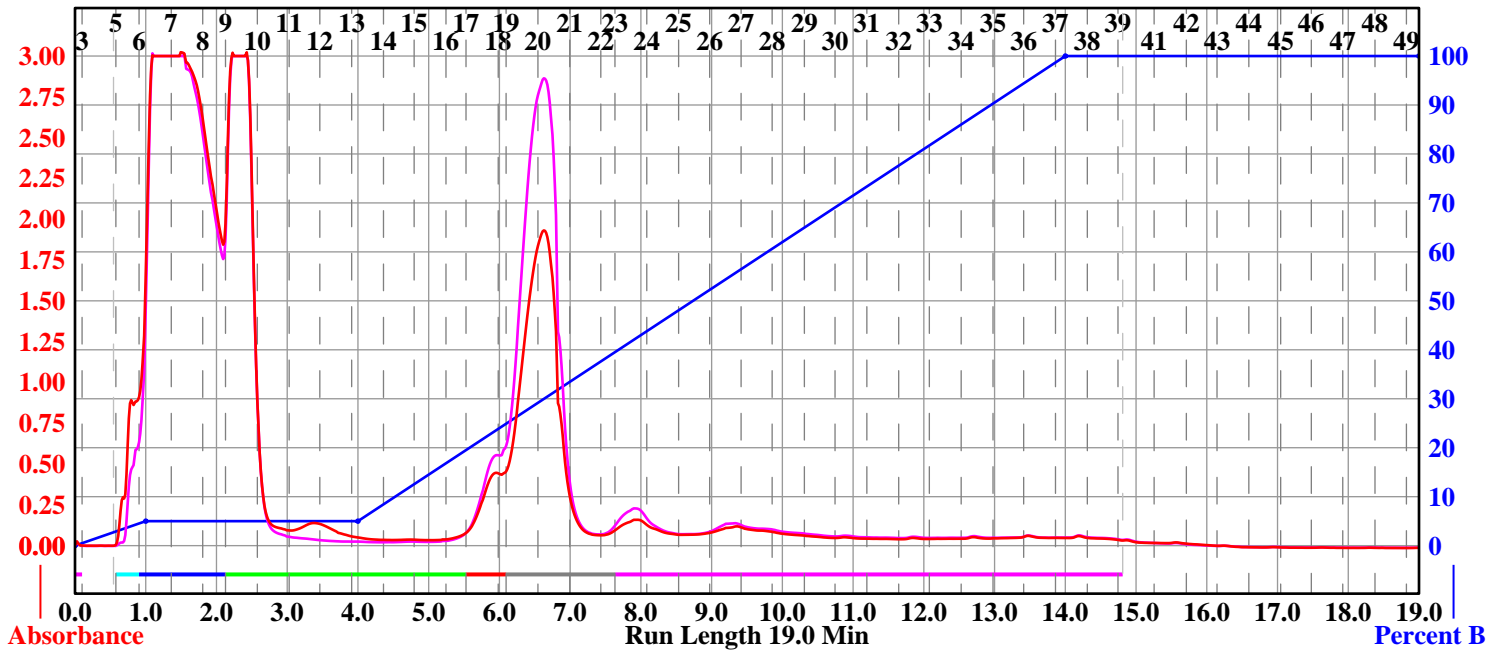

| Rack A |     |     |     |     |     |
|--------|-----|-----|-----|-----|-----|
| 108    | 107 | 106 | 105 | 104 | 103 |
| 97     | 98  | 99  | 100 | 101 | 102 |
| 96     | 95  | 94  | 93  | 92  | 91  |
| 85     | 86  | 87  | 88  | 89  | 90  |
| 84     | 83  | 82  | 81  | 80  | 79  |
| 73     | 74  | 75  | 76  | 77  | 78  |
| 72     | 71  | 70  | 69  | 68  | 67  |
| 61     | 62  | 63  | 64  | 65  | 66  |
| 60     | 59  | 58  | 57  | 56  | 55  |
| 49     | 50  | 51  | 52  | 53  | 54  |
| 48     | 47  | 46  | 45  | 44  | 43  |
| 37     | 38  | 39  | 40  | 41  | 42  |
| 36     | 35  | 34  | 33  | 32  | 31  |
| 25     | 26  | 27  | 28  | 29  | 30  |
| 24     | 23  | 22  | 21  | 20  | 19  |
| 13     | 14  | 15  | 16  | 17  | 18  |
| 12     | 11  | 10  | 9   | 8   | 7   |
| 1      | 2   | 3   | 4   | 5   | 6   |

13 mm x 100 mm Tubes

| Peak # | Start Tube | End Tube |
|--------|------------|----------|
| 1      | A:2        | A:2      |
| 2      | A:5        | A:5      |
| 3      | A:6        | A:8      |
| 4      | A:9        | A:16     |
| 5      | A:17       | A:18     |
| 6      | A:19       | A:22     |
| 7      | A:23       | A:39     |

| Duration | %B    | Solvent A | Solvent B       |
|----------|-------|-----------|-----------------|
| 0.0      | 0.0   | A1 Hexane | B1 1:1 MTBE:EtO |
| 1.0      | 5.0   | A1 Hexane | B1 1:1 MTBE:EtO |
| 3.0      | 5.0   | A1 Hexane | B1 1:1 MTBE:EtO |
| 10.0     | 100.0 | A1 Hexane | B1 1:1 MTBE:EtO |
| 5.0      | 100.0 | A1 Hexane | B1 1:1 MTBE:EtO |

Sample: bis-isoprenylBIPY-ACTUAL

Rf+

Sunday 04 July 2021 02:33PM

RediSep Column: Silica 12g  
 SN: E04150E63D52C Lot: 311537906Z  
 Flow Rate: 30 ml/min  
 Equilibration Volume: 100.8 ml  
 Initial Waste: 0.0 ml  
 Air Purge: 0.5 min  
 Solvent A: Hexane  
 Solvent B: Acetone

Peak Tube Volume: Max.  
 Non-Peak Tube Volume: Max.  
 Loading Type: Solid  
 Wavelength 1 (red): 254nm  
 Peak Width: 1 min  
 Threshold: 0.20 AU  
 Wavelength 2 (purple): 280nm

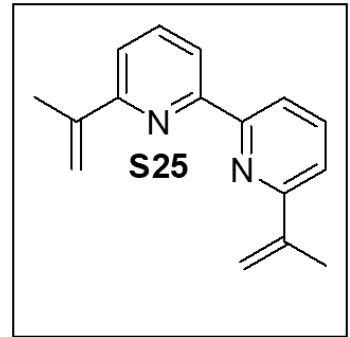

Run Notes:

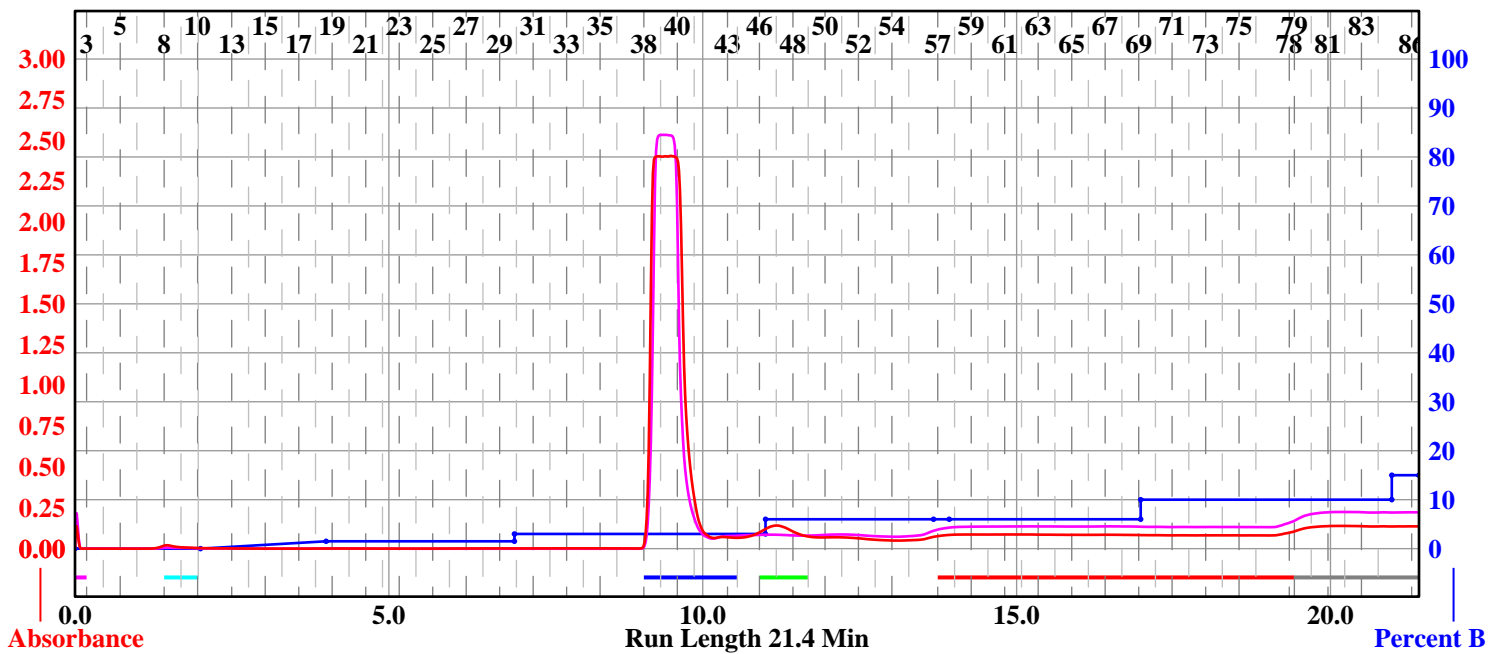

| Rack A |     |     |     |     |     |
|--------|-----|-----|-----|-----|-----|
| 108    | 107 | 106 | 105 | 104 | 103 |
| 97     | 98  | 99  | 100 | 101 | 102 |
| 96     | 95  | 94  | 93  | 92  | 91  |
| 85     | 86  | 87  | 88  | 89  | 90  |
| 84     | 83  | 82  | 81  | 80  | 79  |
| 78     | 77  | 76  | 75  | 74  | 73  |
| 72     | 71  | 70  | 69  | 68  | 67  |
| 61     | 62  | 63  | 64  | 65  | 66  |
| 55     | 54  | 53  | 52  | 51  | 50  |
| 49     | 50  | 51  | 52  | 53  | 54  |
| 43     | 44  | 45  | 46  | 47  | 48  |
| 37     | 38  | 39  | 40  | 41  | 42  |
| 31     | 32  | 33  | 34  | 35  | 36  |
| 25     | 26  | 27  | 28  | 29  | 30  |
| 19     | 20  | 21  | 22  | 23  | 24  |
| 13     | 14  | 15  | 16  | 17  | 18  |
| 7      | 8   | 9   | 10  | 11  | 12  |
| 1      | 2   | 3   | 4   | 5   | 6   |

| Peak # | Start Tube | End Tube |
|--------|------------|----------|
| 1      | A:2        | A:2      |
| 2      | A:8        | A:10     |
| 3      | A:38       | A:43     |
| 4      | A:46       | A:48     |
| 5      | A:57       | A:78     |
| 6      | A:79       | A:86     |

| Duration | %B  | Solvent A | Solvent B |
|----------|-----|-----------|-----------|
| 0.0      | 0.0 | Hexane    | Acetone   |
| 2.0      | 0.0 | Hexane    | Acetone   |
| 2.0      | 1.5 | Hexane    | Acetone   |
| 3.0      | 1.5 | Hexane    | Acetone   |
| 0.0      | 3.0 | Hexane    | Acetone   |
| 4.0      | 3.0 | Hexane    | Acetone   |
| 0.0      | 6.0 | Hexane    | Acetone   |
| 2.7      | 6.0 | Hexane    | Acetone   |
| 0.3      | 6.0 | Hexane    | Acetone   |
| 3.0      | 6.0 | Hexane    | Acetone   |
| ...      | ... | ...       | ...       |

13 mm x 100 mm Tubes

Sample: AMS-A-117

Rf 200

Friday 23 July 2021 07:01AM

RediSep Column: Silica 4g  
Flow Rate: 18 ml/min  
Equilibration Volume: 33.6 ml  
Initial Waste: 0.0 ml  
Air Purge: 0.5 min  
Solvent: A1 Hexane  
Solvent: B1 Ethyl Acetate

Peak Tube Volume: Max.  
Non-Peak Tube Volume: Max.  
Loading Type: Solid  
Wavelength 1 (red): 254nm  
Peak Width: 30 sec  
Threshold: 0.20 AU  
Wavelength 2 (purple): 280nm

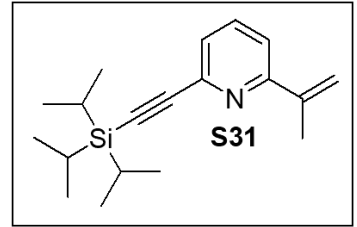

Run Notes:

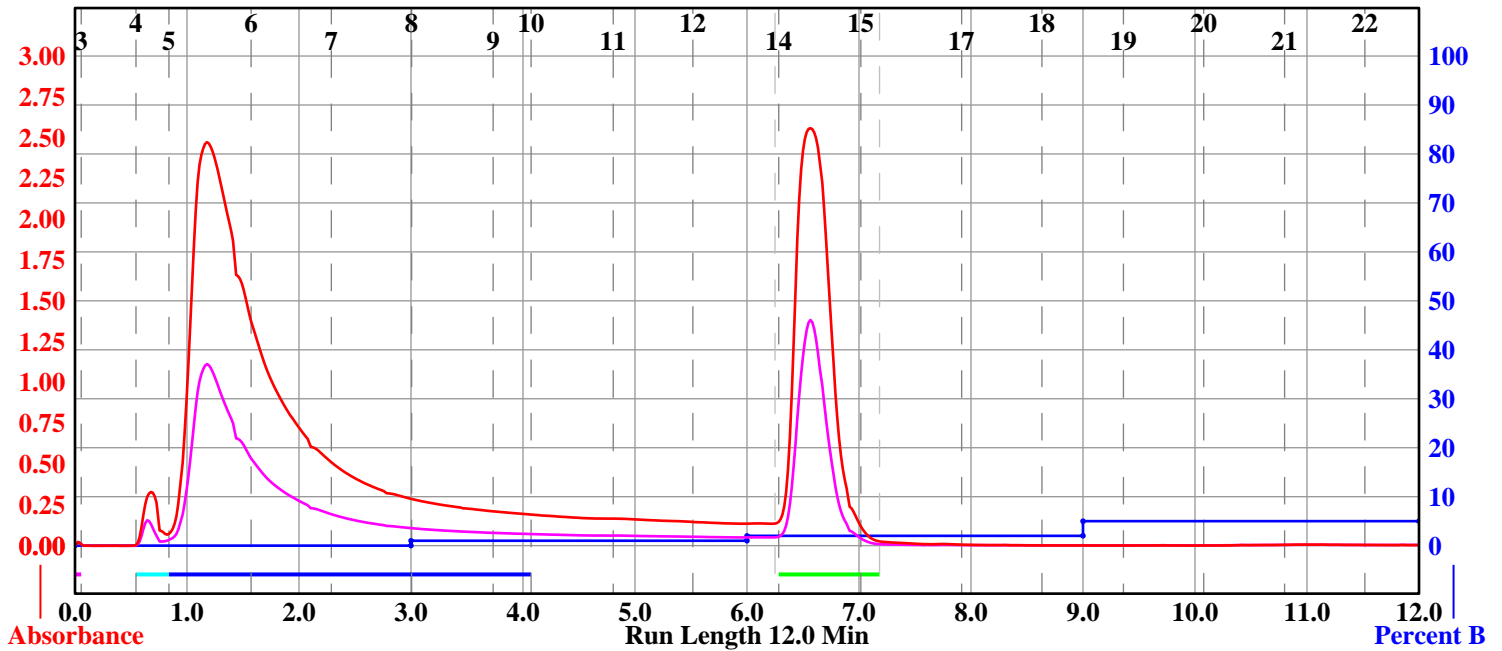

| Rack A |    |    |    |    |
|--------|----|----|----|----|
| 71     | 72 | 73 | 74 | 75 |
| 70     | 69 | 68 | 67 | 66 |
| 61     | 62 | 63 | 64 | 65 |
| 60     | 59 | 58 | 57 | 56 |
| 51     | 52 | 53 | 54 | 55 |
| 50     | 49 | 48 | 47 | 46 |
| 41     | 42 | 43 | 44 | 45 |
| 40     | 39 | 38 | 37 | 36 |
| 31     | 32 | 33 | 34 | 35 |
| 30     | 29 | 28 | 27 | 26 |
| 21     | 22 | 23 | 24 | 25 |
| 20     | 19 | 18 | 17 | 16 |
| 11     | 12 | 13 | 14 | 15 |
| 10     | 9  | 8  | 7  | 6  |
| 1      | 2  | 3  | 4  | 5  |

| Peak # | Start Tube | End Tube |
|--------|------------|----------|
| 1      | A:2        | A:2      |
| 2      | A:4        | A:4      |
| 3      | A:5        | A:9      |
| 4      | A:14       | A:15     |

| Duration | %B  | Solvent A | Solvent B        |
|----------|-----|-----------|------------------|
| 0.0      | 0.0 | A1 Hexane | B1 Ethyl Acetate |
| 3.0      | 0.0 | A1 Hexane | B1 Ethyl Acetate |
| 0.0      | 1.0 | A1 Hexane | B1 Ethyl Acetate |
| 3.0      | 1.0 | A1 Hexane | B1 Ethyl Acetate |
| 0.0      | 2.0 | A1 Hexane | B1 Ethyl Acetate |
| 3.0      | 2.0 | A1 Hexane | B1 Ethyl Acetate |
| 0.0      | 5.0 | A1 Hexane | B1 Ethyl Acetate |
| 3.0      | 5.0 | A1 Hexane | B1 Ethyl Acetate |

16 mm x 100 mm Tubes

Sample: AMS-B-25

Rf 200

Tuesday 29 March 2022 12:27PM

RediSep Column: Silica 12g Gold  
 SN: E04150AA31743 Lot: 312220702W  
 Flow Rate: 30 ml/min  
 Equilibration Volume: 100.8 ml  
 Initial Waste: 0.0 ml  
 Air Purge: 0.5 min  
 Solvent: A1 Hexane  
 Solvent: B1 Ethyl Acetate

Peak Tube Volume: Max.  
 Non-Peak Tube Volume: Max.  
 Loading Type: Solid  
 Wavelength 1 (red): 254nm  
 Peak Width: 1 min  
 Threshold: 0.20 AU  
 Wavelength 2 (purple): 280nm

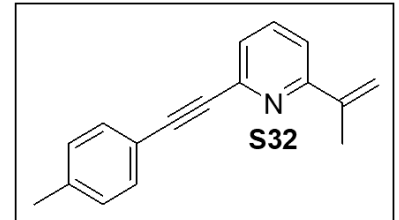

Run Notes:

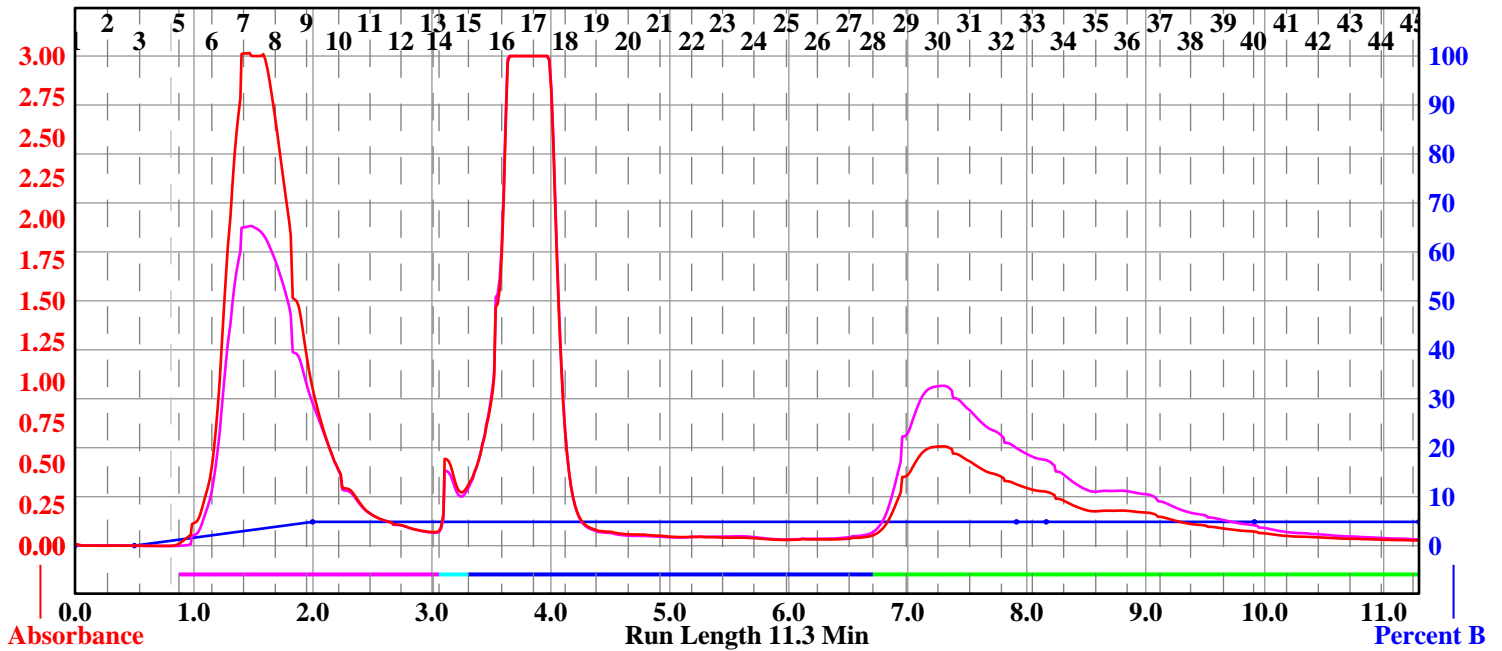

| Rack A |     |     |     |     |     |
|--------|-----|-----|-----|-----|-----|
| 108    | 107 | 106 | 105 | 104 | 103 |
| 97     | 98  | 99  | 100 | 101 | 102 |
| 96     | 95  | 94  | 93  | 92  | 91  |
| 85     | 86  | 87  | 88  | 89  | 90  |
| 84     | 83  | 82  | 81  | 80  | 79  |
| 73     | 74  | 75  | 76  | 77  | 78  |
| 72     | 71  | 70  | 69  | 68  | 67  |
| 61     | 62  | 63  | 64  | 65  | 66  |
| 60     | 59  | 58  | 57  | 56  | 55  |
| 49     | 50  | 51  | 52  | 53  | 54  |
| 48     | 47  | 46  | 45  | 44  | 43  |
| 32     | 33  | 34  | 35  | 36  | 37  |
| 26     | 27  | 28  | 29  | 30  | 31  |
| 20     | 21  | 22  | 23  | 24  | 25  |
| 14     | 15  | 16  | 17  | 18  | 19  |
| 8      | 9   | 10  | 11  | 12  | 13  |
| 2      | 3   | 4   | 5   | 6   | 7   |

| Peak # | Start Tube | End Tube |
|--------|------------|----------|
| 1      | A:5        | A:13     |
| 2      | A:14       | A:14     |
| 3      | A:15       | A:27     |
| 4      | A:28       | A:45     |

| Duration | %B  | Solvent A | Solvent B        |
|----------|-----|-----------|------------------|
| 0.0      | 0.0 | A1 Hexane | B1 Ethyl Acetate |
| 0.5      | 0.0 | A1 Hexane | B1 Ethyl Acetate |
| 1.5      | 4.9 | A1 Hexane | B1 Ethyl Acetate |
| 5.9      | 4.9 | A1 Hexane | B1 Ethyl Acetate |
| 0.2      | 4.9 | A1 Hexane | B1 Ethyl Acetate |
| 1.8      | 4.9 | A1 Hexane | B1 Ethyl Acetate |
| 1.4      | 4.9 | A1 Hexane | B1 Ethyl Acetate |

13 mm x 100 mm Tubes
